# Supplementary material for: Insights from a Pan India Sero-Epidemiological survey (Phenome-India Cohort) for SARS-CoV2
Source: eLife. 2021 Apr 20;10:e66537. doi: 10.7554/eLife.66537 (PMC8118652; doi:10.7554/eLife.66537)
Supplement: Figure 3—source data 1. [file elife-66537-fig3-data1.xlsx]

## Sheet: Data
S.No	COI	Sero-Status Binary	Sero-Status (N/P)	Gender	Staff Type Question Raw Format	Age	Occupation Response Raw	Occupation Response Categorized (S/OS)	Blood Group Response Raw	Blood Group Clubbed	Rh factor Clubbed	Diabetes Response Raw	Diabetes Response Clubbed	Hypertension Response Raw	Hypertension Response Clubbed	Heart or circulatory disorders Response Raw	Heart or circulatory disorders Response Clubbed	Have you been tested for SARS Cov2 virus in the last 6 months response Raw	Have you been tested for SARS Cov2 virus in the last 6 months response clubbed	If yes was the test positive or negative	Fever Response Raw	Fever Response Clubbed	Cough Response Raw	Cough Response Clubbed	Sore throat Response Raw	Sore throat Response Clubbed	Loss of smell Response Raw	Loss of smell Response Clubbed	Loss of taste Response Raw	Loss of taste Response Clubbed	Tiredness(grade on the scale) Respnse Raw	Tiredness(grade on the scale) Response Clubbed	Body ache Response Raw	BodyAche Response Clubbed	Head ache Response Raw	Headache Response Clubbed	Difficulty in breathing Response Raw	Difficulty in breathing Response Clubbed	All Symptoms Response Generated	All Symptom Response Clubbed	Your mode of transportation Response Raw	Your mode of transportation Response Clubbed	Smoking Response Raw	Smoking Response Clubbed	Alcohol Response Raw	Alcohol Response Clubbed	Diet Respnse Raw	Diet Response Clubbed
1	0.067	0	Negative	Male	Staff	48	staff	S		SU	SU	No	No	No	No	No	No	No	No		No	No	No	No	No	No	No	No	No	No	0	No	0	No	0	No	0	No	No;No;No;No;No;No;No;No;No	Asymptomatic	Personal vehicle	Private	Never	No	Never	No	Vegetarian	V
2	0.065	0	Negative	Male	Faculty	43	Principal Scientist	S	B-	B	Negative	Yes	Yes	Yes	Yes	No	No	No	No		No	No	No	No	No	No	No	No	No	No	0	No	0	No	0	No	0	No	No;No;No;No;No;No;No;No;No	Asymptomatic	Personal vehicle	Private	Never	No	Never	No	Vegetarian	V
3	0.062	0	Negative	Male	Student	29	PhD Scholar	S	A+	A	Positive	No	No	No	No	No	No	No	No		No	No	No	No	No	No	No	No	No	No	0	No	0	No	0	No	0	No	No;No;No;No;No;No;No;No;No	Asymptomatic	Personal vehicle	Private	Never	No	Never	No	Non vegetarian	NV
4	0.065	0	Negative	Male	Staff	40	staff	S		SU	SU	No	No	No	No	No	No	No	No		No	No	No	No	No	No	No	No	No	No	0	No	0	No	0	No	0	No	No;No;No;No;No;No;No;No;No	Asymptomatic	Personal vehicle	Private	Never	No	Never	No	Vegetarian	V
5	0.067	0	Negative	Male	Student	27	PhD Scholar	S	AB+	AB	Positive	No	No	No	No	No	No	No	No		No	No	No	No	No	No	No	No	No	No	0	No	0	No	0	No	0	No	No;No;No;No;No;No;No;No;No	Asymptomatic	Personal vehicle	Private	Never	No	Never	No	Non vegetarian	NV
6	0.075	0	Negative	Male	Staff	43	Staff	S		SU	SU	Yes	Yes	No	No	No	No	No	No		No	No	No	No	No	No	No	No	No	No	0	No	0	No	0	No	0	No	No;No;No;No;No;No;No;No;No	Asymptomatic	Personal vehicle	Private	Never	No	Never	No	Occasionally non veg	NV
7	0.061	0	Negative	Male	Staff	40	Technical Officer	S		SU	SU	No	No	No	No	No	No	No	No		No	No	No	No	No	No	No	No	No	No	0	No	0	No	0	No	0	No	No;No;No;No;No;No;No;No;No	Asymptomatic	Personal vehicle	Private	Never	No	Never	No	Vegetarian	V
8	0.066	0	Negative	Male	Staff	50	staff	S		SU	SU	No	No	No	No	No	No	No	No		No	No	No	No	No	No	No	No	No	No	0	No	0	No	0	No	0	No	No;No;No;No;No;No;No;No;No	Asymptomatic	Personal vehicle	Private	Never	No	Never	No	Vegetarian	V
9	0.066	0	Negative	Male	Staff	46	staff	S		SU	SU	No	No	No	No	No	No	No	No		No	No	No	No	No	No	No	No	No	No	0	No	0	No	0	No	0	No	No;No;No;No;No;No;No;No;No	Asymptomatic	Personal vehicle	Private	Never	No	Never	No	Vegetarian	V
10	0.065	0	Negative	Male	Student	25	Student	S	B+	B	Positive	No	No	No	No	No	No	No	No		Yes	Yes	No	No	No	No	No	No	No	No	3	Yes	3	Yes	4	Yes	0	No	Yes;No;No;No;No;Yes;Yes;Yes;No	Symptomatic	Personal vehicle	Private	Never	No	Never	No	Vegetarian	V
11	0.074	0	Negative	Male	Staff	40	staff	S		SU	SU	No	No	No	No	No	No	No	No		No	No	No	No	No	No	No	No	No	No	0	No	0	No	0	No	0	No	No;No;No;No;No;No;No;No;No	Asymptomatic	Personal vehicle	Private	Never	No	Never	No	Vegetarian	V
12	0.134	0	Negative	Male	Staff	45	staff	S		SU	SU	No	No	No	No	No	No	No	No		No	No	No	No	No	No	No	No	No	No	0	No	0	No	0	No	0	No	No;No;No;No;No;No;No;No;No	Asymptomatic	Personal vehicle	Private	Never	No	Never	No	Vegetarian	V
13	0.064	0	Negative	Male	Staff	30	staff	S		SU	SU	No	No	No	No	No	No	No	No		No	No	No	No	No	No	No	No	No	No	0	No	0	No	0	No	0	No	No;No;No;No;No;No;No;No;No	Asymptomatic	Personal vehicle	Private	Never	No	Never	No	Vegetarian	V
14	0.066	0	Negative	Male	Staff	39	staff	S		SU	SU	No	No	No	No	No	No	No	No		No	No	No	No	No	No	No	No	No	No	0	No	0	No	0	No	0	No	No;No;No;No;No;No;No;No;No	Asymptomatic	Personal vehicle	Private	Never	No	Never	No	Vegetarian	V
15	0.067	0	Negative	Male	Staff	43	staff	S		SU	SU	No	No	No	No	No	No	No	No		No	No	No	No	No	No	No	No	No	No	0	No	0	No	0	No	0	No	No;No;No;No;No;No;No;No;No	Asymptomatic	Personal vehicle	Private	Never	No	Never	No	Vegetarian	V
16	0.062	0	Negative	Male	Staff	47	Staff	S		SU	SU	No	No	No	No	No	No	No	No		No	No	No	No	No	No	No	No	No	No	0	No	0	No	0	No	0	No	No;No;No;No;No;No;No;No;No	Asymptomatic	Personal vehicle	Private	Never	No	Never	No	Vegetarian	V
17	0.064	0	Negative	Female	Staff	38	staff	S		SU	SU	No	No	No	No	No	No	No	No		No	No	No	No	No	No	No	No	No	No	0	No	0	No	0	No	0	No	No;No;No;No;No;No;No;No;No	Asymptomatic	Personal vehicle	Private	Never	No	Never	No	Vegetarian	V
18	0.116	0	Negative	Male	Staff	42	staff	S		SU	SU	No	No	No	No	No	No	No	No		No	No	No	No	No	No	No	No	No	No	0	No	0	No	0	No	0	No	No;No;No;No;No;No;No;No;No	Asymptomatic	Personal vehicle	Private	Never	No	Never	No	Vegetarian	V
19	0.063	0	Negative	Male	Staff	70	Staff	S	B+	B	Positive	No	No	No	No	No	No	No	No		No	No	No	No	No	No	No	No	No	No	0	No	0	No	0	No	0	No	No;No;No;No;No;No;No;No;No	Asymptomatic	Personal vehicle	Private	Never	No	Never	No	Vegetarian	V
20	0.085	0	Negative	Male	Staff	60	staff	S		SU	SU	No	No	No	No	No	No	No	No		No	No	No	No	No	No	No	No	No	No	0	No	0	No	0	No	0	No	No;No;No;No;No;No;No;No;No	Asymptomatic	Personal vehicle	Private	Never	No	Never	No	Vegetarian	V
21	0.108	0	Negative	Male	Contractual Staff	56	staff	S	B+	B	Positive	No	No	No	No	No	No	No	No		No	No	No	No	No	No	No	No	No	No	0	No	0	No	0	No	0	No	No;No;No;No;No;No;No;No;No	Asymptomatic	Personal vehicle	Private	Never	No	Never	No	Vegetarian	V
22	0.064	0	Negative	Male	Staff	45	Staff	S	B+	B	Positive	No	No	No	No	No	No	No	No		No	No	No	No	No	No	No	No	No	No	0	No	0	No	0	No	0	No	No;No;No;No;No;No;No;No;No	Asymptomatic	Personal vehicle	Private	Never	No	Never	No	Vegetarian	V
23	0.064	0	Negative	Male	Contractual Staff	28	Staff	S	B+	B	Positive	No	No	No	No	No	No	No	No		No	No	No	No	No	No	No	No	No	No	0	No	0	No	0	No	0	No	No;No;No;No;No;No;No;No;No	Asymptomatic	Personal vehicle	Private	Never	No	Never	No	Vegetarian	V
24	0.07	0	Negative	Male	Staff	35	Govt.	S	B+	B	Positive	No	No	No	No	No	No	No	No		No	No	No	No	No	No	No	No	No	No	2	No	1	No	1	No	0	No	No;No;No;No;No;No;No;No;No	Asymptomatic	Personal vehicle	Private	Never	No	Never	No	Non vegetarian	NV
25	0.086	0	Negative	Female	Others	49	HOMEMAKER	S	A+	A	Positive	Yes	Yes	Yes	Yes	No	No	No	No		No	No	No	No	No	No	No	No	No	No	0	No	0	No	0	No	0	No	No;No;No;No;No;No;No;No;No	Asymptomatic	Personal vehicle	Private	Never	No	Never	No	Occasionally non veg	NV
26	0.067	0	Negative	Male	Student	29	Student	S	AB+	AB	Positive	No	No	No	No	No	No	No	No		No	No	No	No	No	No	No	No	No	No	0	No	0	No	0	No	0	No	No;No;No;No;No;No;No;No;No	Asymptomatic	Personal vehicle	Private	Never	No	Never	No	Vegetarian	V
27	0.06	0	Negative	Male	Student	28	Student	S	O+	O	Positive	No	No	No	No	No	No	No	No		No	No	No	No	No	No	No	No	No	No	0	No	0	No	0	No	0	No	No;No;No;No;No;No;No;No;No	Asymptomatic	Personal vehicle	Private	Never	No	Never	No	Non vegetarian	NV
28	0.063	0	Negative	Male	Staff	47	Staff	S		SU	SU	No	No	No	No	No	No	No	No		No	No	No	No	No	No	No	No	No	No	0	No	0	No	0	No	0	No	No;No;No;No;No;No;No;No;No	Asymptomatic	Personal vehicle	Private	Never	No	Never	No	Vegetarian	V
29	0.06	0	Negative	Male	Staff	60	staff	S		SU	SU	No	No	No	No	No	No	No	No		No	No	No	No	No	No	No	No	No	No	0	No	0	No	0	No	0	No	No;No;No;No;No;No;No;No;No	Asymptomatic	Personal vehicle	Private	Never	No	Never	No	Vegetarian	V
30	0.063	0	Negative	Male	Staff	40	Staff	S	B+	B	Positive	No	No	No	No	No	No	No	No		No	No	No	No	No	No	No	No	No	No	0	No	0	No	0	No	0	No	No;No;No;No;No;No;No;No;No	Asymptomatic	Personal vehicle	Private	Never	No	Never	No	Vegetarian	V
31	0.065	0	Negative	Male	Contractual Staff	37	Staff	S	B+	B	Positive	No	No	No	No	No	No	No	No		No	No	No	No	No	No	No	No	No	No	0	No	0	No	0	No	0	No	No;No;No;No;No;No;No;No;No	Asymptomatic	Personal vehicle	Private	Never	No	Never	No	Vegetarian	V
32	0.073	0	Negative	Male	Student	27	Student	S		SU	SU	No	No	Yes	Yes	No	No	No	No		No	No	Yes	Yes	Yes	Yes	No	No	No	No	2	No	3	Yes	5	Yes	2	No	No;Yes;Yes;No;No;No;Yes;Yes;No	Symptomatic	Personal vehicle	Private	Never	No	Occasionally	Occ	Vegetarian	V
33	0.077	0	Negative	Male	Student	29	Student	S	B+	B	Positive	No	No	No	No	No	No	No	No		No	No	No	No	No	No	No	No	No	No	0	No	0	No	0	No	0	No	No;No;No;No;No;No;No;No;No	Asymptomatic	Personal vehicle	Private	Never	No	Never	No	Vegetarian	V
34	0.072	0	Negative	Male	Staff	36	staff	S		SU	SU	No	No	No	No	No	No	No	No		No	No	No	No	No	No	No	No	No	No	0	No	0	No	0	No	0	No	No;No;No;No;No;No;No;No;No	Asymptomatic	Personal vehicle	Private	Never	No	Never	No	Vegetarian	V
35	0.091	0	Negative	Male	Contractual Staff	28	Student	S	A+	A	Positive	No	No	No	No	No	No	No	No		No	No	No	No	No	No	No	No	No	No	0	No	0	No	0	No	0	No	No;No;No;No;No;No;No;No;No	Asymptomatic	Personal vehicle	Private	Never	No	Occasionally	Occ	Occasionally non veg	NV
36	0.06	0	Negative	Male	Student	36	Student	S	O+	O	Positive	No	No	No	No	No	No	No	No		No	No	No	No	No	No	No	No	No	No	0	No	0	No	0	No	0	No	No;No;No;No;No;No;No;No;No	Asymptomatic	No	Private	Never	No	Occasionally	Occ	Occasionally non veg	NV
37	0.069	0	Negative	Female	Faculty	39	Government employee	S	AB+	AB	Positive	No	No	No	No	No	No	No	No		No	No	No	No	No	No	No	No	No	No	0	No	0	No	0	No	0	No	No;No;No;No;No;No;No;No;No	Asymptomatic	Personal vehicle	Private	Never	No	Never	No	Occasionally non veg	NV
38	0.065	0	Negative	Male	Staff	44	Govt employee	S	B+	B	Positive	No	No	No	No	No	No	No	No		No	No	No	No	No	No	No	No	No	No	1	No	1	No	1	No	0	No	No;No;No;No;No;No;No;No;No	Asymptomatic	Personal vehicle	Private	Never	No	Occasionally	Occ	Occasionally non veg	NV
39	0.071	0	Negative	Male	Staff	36	Staff	S	B+	B	Positive	No	No	No	No	No	No	No	No		No	No	No	No	No	No	No	No	No	No	0	No	0	No	0	No	0	No	No;No;No;No;No;No;No;No;No	Asymptomatic	Personal vehicle	Private	Never	No	Never	No	Occasionally non veg	NV
40	0.067	0	Negative	Male	Faculty	SU	Scientist	S	B+	B	Positive	No	No	No	No	No	No	No	No		No	No	No	No	No	No	No	No	No	No	0	No	0	No	0	No	0	No	No;No;No;No;No;No;No;No;No	Asymptomatic	Personal vehicle	Private	Never	No	Never	No	Vegetarian	V
41	0.084	0	Negative	Male	Faculty	36	Scientist	S	O+	O	Positive	No	No	Yes	Yes	No	No	No	No		No	No	No	No	No	No	No	No	No	No	2	No	1	No	2	No	0	No	No;No;No;No;No;No;No;No;No	Asymptomatic	Personal vehicle	Private	Never	No	Never	No	Vegetarian	V
42	0.065	0	Negative	Female	Others	38	House wife	S	A-	A	Negative	No	No	No	No	No	No	No	No		No	No	No	No	No	No	No	No	No	No	0	No	0	No	0	No	0	No	No;No;No;No;No;No;No;No;No	Asymptomatic	Personal vehicle	Private	Never	No	Never	No	Occasionally non veg	NV
43	0.066	0	Negative	Male	Staff	35	staff	S		SU	SU	No	No	No	No	No	No	No	No		No	No	No	No	No	No	No	No	No	No	0	No	0	No	0	No	0	No	No;No;No;No;No;No;No;No;No	Asymptomatic	Personal vehicle	Private	Never	No	Never	No	Vegetarian	V
44	0.07	0	Negative	Male	Staff	44	Staff	S		SU	SU	No	No	No	No	No	No	No	No		No	No	No	No	No	No	No	No	No	No	0	No	0	No	0	No	0	No	No;No;No;No;No;No;No;No;No	Asymptomatic	Personal vehicle	Private	Never	No	Never	No	Vegetarian	V
45	0.069	0	Negative	Male	Staff	34	Government servant	S	AB+	AB	Positive	No	No	No	No	No	No	No	No		No	No	No	No	No	No	No	No	No	No	0	No	0	No	0	No	0	No	No;No;No;No;No;No;No;No;No	Asymptomatic	Personal vehicle	Private	Sporadic	Yes	Occasionally	Occ	Occasionally non veg	NV
46	41.49	1	Positive	Male	Staff	42	GOVT Servent	S	B+	B	Positive	Yes	Yes	No	No	No	No	No	No		No	No	No	No	No	No	No	No	No	No	0	No	0	No	0	No	0	No	No;No;No;No;No;No;No;No;No	Asymptomatic	Personal vehicle	Private	Never	No	Never	No	Non vegetarian	NV
47	0.072	0	Negative	Male	Faculty	40	Scientist	S	O+	O	Positive	No	No	No	No	No	No	No	No		No	No	No	No	No	No	No	No	No	No	1	No	1	No	0	No	0	No	No;No;No;No;No;No;No;No;No	Asymptomatic	Personal vehicle	Private	Never	No	Occasionally	Occ	Vegetarian	V
48	0.07	0	Negative	Female	Staff	54	Staff	S	B+	B	Positive	No	No	No	No	No	No	No	No		No	No	No	No	No	No	No	No	No	No	0	No	0	No	0	No	0	No	No;No;No;No;No;No;No;No;No	Asymptomatic	Personal vehicle	Private	Never	No	Never	No	Vegetarian	V
49	8.39	1	Positive	Male	Staff	53	staff	S		SU	SU	No	No	No	No	No	No	No	No		No	No	No	No	No	No	No	No	No	No	0	No	0	No	0	No	0	No	No;No;No;No;No;No;No;No;No	Asymptomatic	Personal vehicle	Private	Never	No	Never	No	Vegetarian	V
50	0.067	0	Negative	Male	Faculty	40	Scientist	S	B+	B	Positive	Yes	Yes	No	No	No	No	No	No		No	No	No	No	No	No	No	No	No	No	1	No	0	No	0	No	0	No	No;No;No;No;No;No;No;No;No	Asymptomatic	Personal vehicle	Private	Never	No	Occasionally	Occ	Non vegetarian	NV
51	0.066	0	Negative	Male	Staff	61	staff	S		SU	SU	No	No	No	No	No	No	No	No		No	No	No	No	No	No	No	No	No	No	0	No	0	No	0	No	0	No	No;No;No;No;No;No;No;No;No	Asymptomatic	Personal vehicle	Private	Never	No	Never	No	Vegetarian	V
52	0.061	0	Negative	Male	Staff	27	Employee	S	A+	A	Positive	No	No	No	No	No	No	No	No		No	No	No	No	No	No	No	No	No	No	1	No	0	No	0	No	0	No	No;No;No;No;No;No;No;No;No	Asymptomatic	Personal vehicle	Private	Sporadic	Yes	Occasionally	Occ	Vegetarian	V
53	0.062	0	Negative	Male	Student	33	Student	S	O+	O	Positive	No	No	No	No	No	No	No	No		No	No	Yes	Yes	No	No	No	No	No	No	1	No	0	No	1	No	0	No	No;Yes;No;No;No;No;No;No;No	Symptomatic	Personal vehicle	Private	Regular	Yes	Never	No	Vegetarian	V
54	0.064	0	Negative	Male	Staff	53	Govt service	S	B+	B	Positive	No	No	Yes	Yes	No	No	No	No		No	No	No	No	No	No	No	No	No	No	3	Yes	0	No	0	No	0	No	No;No;No;No;No;Yes;No;No;No	Symptomatic	Personal vehicle	Private	Never	No	Occasionally	Occ	Non vegetarian	NV
55	0.065	0	Negative	Female	Others	46	house wife	S	B+	B	Positive	No	No	No	No	No	No	No	No		No	No	No	No	No	No	No	No	No	No	0	No	0	No	3	Yes	0	No	No;No;No;No;No;No;No;Yes;No	Symptomatic	Personal vehicle	Private	Never	No	Never	No	Non vegetarian	NV
56	0.065	0	Negative	Male	Staff	30	staff	S		SU	SU	No	No	No	No	No	No	No	No		No	No	No	No	No	No	No	No	No	No	0	No	0	No	0	No	0	No	No;No;No;No;No;No;No;No;No	Asymptomatic	Personal vehicle	Private	Never	No	Never	No	Vegetarian	V
57	0.065	0	Negative	Male	Staff	45	staff	S		SU	SU	No	No	No	No	No	No	No	No		No	No	No	No	No	No	No	No	No	No	0	No	0	No	0	No	0	No	No;No;No;No;No;No;No;No;No	Asymptomatic	Personal vehicle	Private	Never	No	Never	No	Vegetarian	V
58	0.081	0	Negative	Male	Staff	38	staff	S		SU	SU	No	No	No	No	No	No	No	No		No	No	No	No	No	No	No	No	No	No	0	No	0	No	0	No	0	No	No;No;No;No;No;No;No;No;No	Asymptomatic	Personal vehicle	Private	Never	No	Never	No	Vegetarian	V
59	0.091	0	Negative	Male	Staff	43	Staff	S	A+	A	Positive	No	No	No	No	No	No	No	No		No	No	No	No	No	No	No	No	No	No	0	No	0	No	0	No	0	No	No;No;No;No;No;No;No;No;No	Asymptomatic	Personal vehicle	Private	Never	No	Never	No	Vegetarian	V
60	0.062	0	Negative	Male	Staff	59	Staff	S	B+	B	Positive	No	No	No	No	No	No	No	No		No	No	No	No	No	No	No	No	No	No	0	No	0	No	0	No	0	No	No;No;No;No;No;No;No;No;No	Asymptomatic	Personal vehicle	Private	Never	No	Never	No	Occasionally non veg	NV
61	0.101	0	Negative	Male	Contractual Staff	37	Staff	S	A+	A	Positive	No	No	No	No	No	No	No	No		No	No	No	No	No	No	No	No	No	No	0	No	0	No	0	No	0	No	No;No;No;No;No;No;No;No;No	Asymptomatic	Personal vehicle	Private	Never	No	Never	No	Vegetarian	V
62	0.066	0	Negative	Male	Staff	45	staff	S		SU	SU	No	No	No	No	No	No	No	No		No	No	No	No	No	No	No	No	No	No	0	No	0	No	0	No	0	No	No;No;No;No;No;No;No;No;No	Asymptomatic	Personal vehicle	Private	Never	No	Never	No	Vegetarian	V
63	0.063	0	Negative	Male	Staff	57	Lab.Assistant	S	A+	A	Positive	Yes	Yes	Yes	Yes	No	No	No	No		No	No	No	No	No	No	No	No	No	No	0	No	0	No	0	No	0	No	No;No;No;No;No;No;No;No;No	Asymptomatic	Bycycle	Private	Never	No	Occasionally	Occ	Vegetarian	V
64	0.065	0	Negative	Male	Staff	51	Security guard	OS	B+	B	Positive	No	No	No	No	No	No	No	No		No	No	No	No	No	No	No	No	No	No	0	No	0	No	0	No	0	No	No;No;No;No;No;No;No;No;No	Asymptomatic	Personal vehicle	Private	Never	No	Never	No	Occasionally non veg	NV
65	0.065	0	Negative	Male	Faculty	60	Chief Scientist	S	A+	A	Positive	No	No	No	No	No	No	No	No		No	No	No	No	No	No	No	No	No	No	1	No	0	No	1	No	0	No	No;No;No;No;No;No;No;No;No	Asymptomatic	Personal vehicle	Private	Sporadic	Yes	Occasionally	Occ	Occasionally non veg	NV
66	0.063	0	Negative	Male	Staff	49	Staff	S	A-	A	Negative	No	No	No	No	No	No	No	No		No	No	No	No	No	No	No	No	No	No	0	No	0	No	0	No	0	No	No;No;No;No;No;No;No;No;No	Asymptomatic	Personal vehicle	Private	Never	No	Never	No	Occasionally non veg	NV
67	94.24	1	Positive	Male	Staff	44	Security Guard	OS	O+	O	Positive	No	No	No	No	No	No	Yes	Yes	Positive	No	No	No	No	No	No	No	No	No	No	0	No	0	No	0	No	0	No	No;No;No;No;No;No;No;No;No	Asymptomatic	Personal vehicle	Private	Never	No	Never	No	Vegetarian	V
68	0.134	0	Negative	Male	Student	25	Student	S		SU	SU	No	No	No	No	No	No	No	No		No	No	No	No	No	No	No	No	No	No	1	No	0	No	0	No	0	No	No;No;No;No;No;No;No;No;No	Asymptomatic	Personal vehicle	Private	Never	No	Never	No	Vegetarian	V
69	0.065	0	Negative	Male	Student	25	Student	S		SU	SU	No	No	No	No	No	No	No	No		No	No	Yes	Yes	Yes	Yes	No	No	No	No	2	No	1	No	0	No	0	No	No;Yes;Yes;No;No;No;No;No;No	Symptomatic	Personal vehicle	Private	Never	No	Never	No	Vegetarian	V
70	0.206	0	Negative	Male	Staff	36	Security Guard	OS	B+	B	Positive	No	No	No	No	No	No	No	No		No	No	No	No	No	No	No	No	No	No	0	No	0	No	0	No	0	No	No;No;No;No;No;No;No;No;No	Asymptomatic	Personal vehicle	Private	Never	No	Never	No	Occasionally non veg	NV
71	0.228	0	Negative	Male	Faculty	35	SCIENTIST	S	B+	B	Positive	No	No	No	No	No	No	No	No		No	No	No	No	Yes	Yes	No	No	No	No	2	No	1	No	1	No	0	No	No;No;Yes;No;No;No;No;No;No	Symptomatic	Personal vehicle	Private	Never	No	Never	No	Vegetarian	V
72	0.076	0	Negative	Female	Faculty	36	Senior Scientist	S	O+	O	Positive	No	No	No	No	No	No	No	No		No	No	No	No	Yes	Yes	No	No	No	No	2	No	2	No	2	No	0	No	No;No;Yes;No;No;No;No;No;No	Symptomatic	Personal vehicle	Private	Never	No	Never	No	Vegetarian	V
73	0.074	0	Negative	Male	Staff	49	Security Guard	OS	A+	A	Positive	No	No	No	No	No	No	No	No		No	No	No	No	No	No	No	No	No	No	0	No	0	No	0	No	0	No	No;No;No;No;No;No;No;No;No	Asymptomatic	Personal vehicle	Private	Never	No	Never	No	Vegetarian	V
74	0.428	0	Negative	Male	Staff	52	Staff	S	B+	B	Positive	No	No	No	No	No	No	No	No		No	No	No	No	No	No	No	No	No	No	0	No	0	No	0	No	0	No	No;No;No;No;No;No;No;No;No	Asymptomatic	Personal vehicle	Private	Never	No	Never	No	Occasionally non veg	NV
75	0.071	0	Negative	Male	Staff	46	Staff	S		SU	SU	No	No	No	No	No	No	No	No		No	No	No	No	No	No	No	No	No	No	0	No	0	No	0	No	0	No	No;No;No;No;No;No;No;No;No	Asymptomatic	Personal vehicle	Private	Never	No	Never	No	Vegetarian	V
76	0.067	0	Negative	Male	Staff	59	Staff	S		SU	SU	No	No	No	No	No	No	No	No		No	No	No	No	No	No	No	No	No	No	0	No	0	No	0	No	0	No	No;No;No;No;No;No;No;No;No	Asymptomatic	Personal vehicle	Private	Never	No	Never	No	Vegetarian	V
77	0.065	0	Negative	Male	Staff	52	staff	S		SU	SU	No	No	No	No	No	No	No	No		No	No	No	No	No	No	No	No	No	No	0	No	0	No	0	No	0	No	No;No;No;No;No;No;No;No;No	Asymptomatic	Personal vehicle	Private	Never	No	Never	No	Vegetarian	V
78	9.01	1	Positive	Male	Staff	45	Security Guard	OS		SU	SU	No	No	No	No	No	No	No	No		No	No	No	No	No	No	No	No	No	No	0	No	0	No	0	No	0	No	No;No;No;No;No;No;No;No;No	Asymptomatic	Personal vehicle	Private	Never	No	Never	No	Vegetarian	V
79	74.38	1	Positive	Male	Staff	50	Staff	S	A+	A	Positive	No	No	Yes	Yes	No	No	No	No		No	No	No	No	No	No	No	No	No	No	0	No	0	No	0	No	0	No	No;No;No;No;No;No;No;No;No	Asymptomatic	Personal vehicle	Private	Never	No	Never	No	Occasionally non veg	NV
80	0.177	0	Negative	Male	Staff	36	Technical Officer	S	A+	A	Positive	No	No	No	No	No	No	No	No		No	No	No	No	No	No	No	No	No	No	0	No	0	No	0	No	0	No	No;No;No;No;No;No;No;No;No	Asymptomatic	Personal vehicle	Private	Never	No	Never	No	Vegetarian	V
81	0.095	0	Negative	Male	Staff	57	Staff	S	O+	O	Positive	No	No	No	No	No	No	No	No		No	No	No	No	No	No	No	No	No	No	0	No	0	No	0	No	0	No	No;No;No;No;No;No;No;No;No	Asymptomatic	Personal vehicle	Private	Never	No	Never	No	Vegetarian	V
82	0.085	0	Negative	Male	Staff	48	Security Guard	OS	B+	B	Positive	No	No	No	No	No	No	No	No		No	No	No	No	No	No	No	No	No	No	0	No	0	No	0	No	0	No	No;No;No;No;No;No;No;No;No	Asymptomatic	Personal vehicle	Private	Never	No	Never	No	Vegetarian	V
83	0.126	0	Negative	Male	Staff	32	GOVT	S	B+	B	Positive	No	No	No	No	No	No	No	No		No	No	No	No	No	No	No	No	No	No	0	No	0	No	0	No	0	No	No;No;No;No;No;No;No;No;No	Asymptomatic	Personal vehicle	Private	Regular	Yes	Occasionally	Occ	Non vegetarian	NV
84	0.068	0	Negative	Male	Staff	47	Security Guard	OS		SU	SU	No	No	No	No	No	No	No	No		No	No	No	No	No	No	No	No	No	No	0	No	0	No	0	No	0	No	No;No;No;No;No;No;No;No;No	Asymptomatic	Personal vehicle	Private	Never	No	Never	No	Non vegetarian	NV
85	0.07	0	Negative	Male	Staff	52	Security Guard	OS	O+	O	Positive	No	No	No	No	No	No	No	No		No	No	No	No	No	No	No	No	No	No	0	No	0	No	0	No	0	No	No;No;No;No;No;No;No;No;No	Asymptomatic	Personal vehicle	Private	Never	No	Never	No	Non vegetarian	NV
86	0.339	0	Negative	Male	Staff	29	Security Guard	OS	B+	B	Positive	No	No	No	No	No	No	No	No		No	No	No	No	No	No	No	No	No	No	0	No	0	No	0	No	0	No	No;No;No;No;No;No;No;No;No	Asymptomatic	Personal vehicle	Private	Never	No	Never	No	Occasionally non veg	NV
87	0.126	0	Negative	Male	Staff	26	Security Guard	OS		SU	SU	No	No	No	No	No	No	No	No		No	No	No	No	No	No	No	No	No	No	0	No	0	No	0	No	0	No	No;No;No;No;No;No;No;No;No	Asymptomatic	Personal vehicle	Private	Never	No	Never	No	Non vegetarian	NV
88	0.146	0	Negative	Male	Staff	46	Staff	S		SU	SU	No	No	No	No	No	No	No	No		No	No	No	No	No	No	No	No	No	No	0	No	0	No	0	No	0	No	No;No;No;No;No;No;No;No;No	Asymptomatic	Personal vehicle	Private	Never	No	Never	No	Vegetarian	V
89	0.067	0	Negative	Male	Staff	39	staff	S		SU	SU	No	No	No	No	No	No	No	No		No	No	No	No	No	No	No	No	No	No	0	No	0	No	0	No	0	No	No;No;No;No;No;No;No;No;No	Asymptomatic	Personal vehicle	Private	Never	No	Never	No	Vegetarian	V
90	0.225	0	Negative	Male	Staff	51	Staff	S		SU	SU	No	No	No	No	No	No	No	No		No	No	No	No	No	No	No	No	No	No	0	No	0	No	0	No	0	No	No;No;No;No;No;No;No;No;No	Asymptomatic	Personal vehicle	Private	Never	No	Never	No	Vegetarian	V
91	0.101	0	Negative	Male	Faculty	58	SERVICE	S	O+	O	Positive	No	No	No	No	No	No	No	No		No	No	No	No	No	No	No	No	No	No	1	No	0	No	0	No	0	No	No;No;No;No;No;No;No;No;No	Asymptomatic	Personal vehicle	Private	Never	No	Never	No	Occasionally non veg	NV
92	0.063	0	Negative	Male	Faculty	58	Scientist	S	O+	O	Positive	Yes	Yes	Yes	Yes	No	No	No	No		No	No	No	No	No	No	No	No	No	No	0	No	0	No	0	No	0	No	No;No;No;No;No;No;No;No;No	Asymptomatic	Personal vehicle	Private	Never	No	Never	No	Non vegetarian	NV
93	0.14	0	Negative	Female	Staff	56	Govt service	S	B-	B	Negative	No	No	Yes	Yes	No	No	No	No		No	No	No	No	No	No	No	No	No	No	1	No	0	No	0	No	0	No	No;No;No;No;No;No;No;No;No	Asymptomatic	Personal vehicle	Private	Never	No	Never	No	Vegetarian	V
94	0.123	0	Negative	Male	Student	32	PhD Scholar	S	A+	A	Positive	No	No	No	No	No	No	No	No		No	No	No	No	No	No	No	No	No	No	1	No	1	No	0	No	0	No	No;No;No;No;No;No;No;No;No	Asymptomatic	Personal vehicle	Private	Sporadic	Yes	Occasionally	Occ	Non vegetarian	NV
95	0.07	0	Negative	Male	Staff	45	Central Govt service	S	B+	B	Positive	No	No	No	No	No	No	No	No		No	No	No	No	No	No	No	No	No	No	0	No	0	No	0	No	0	No	No;No;No;No;No;No;No;No;No	Asymptomatic	Personal vehicle	Private	Sporadic	Yes	Occasionally	Occ	Occasionally non veg	NV
96	0.068	0	Negative	Male	Staff	45	Service	S	B+	B	Positive	No	No	No	No	No	No	No	No		No	No	No	No	No	No	No	No	No	No	0	No	0	No	0	No	0	No	No;No;No;No;No;No;No;No;No	Asymptomatic	Personal vehicle	Private	Never	No	Never	No	Vegetarian	V
97	0.066	0	Negative	Male	Staff	53	Staff	S		SU	SU	Yes	Yes	Yes	Yes	No	No	No	No		No	No	No	No	No	No	No	No	No	No	0	No	0	No	0	No	0	No	No;No;No;No;No;No;No;No;No	Asymptomatic	Personal vehicle	Private	Never	No	Never	No	Vegetarian	V
98	0.068	0	Negative	Female	Staff	55	12th	S	B+	B	Positive	Yes	Yes	No	No	No	No	No	No		No	No	No	No	No	No	No	No	No	No	2	No	2	No	2	No	2	No	No;No;No;No;No;No;No;No;No	Asymptomatic	Personal vehicle	Private	Never	No	Never	No	Occasionally non veg	NV
99	0.064	0	Negative	Male	Staff	28	Staff	S	AB+	AB	Positive	No	No	No	No	No	No	No	No		No	No	No	No	No	No	No	No	No	No	0	No	0	No	0	No	0	No	No;No;No;No;No;No;No;No;No	Asymptomatic	Personal vehicle	Private	Never	No	Never	No	Vegetarian	V
100	4.77	1	Positive	Female	Others	49	Housewife	S		SU	SU	No	No	No	No	No	No	No	No		No	No	No	No	No	No	No	No	No	No	0	No	0	No	0	No	0	No	No;No;No;No;No;No;No;No;No	Asymptomatic	Personal vehicle	Private	Never	No	Never	No	Vegetarian	V
101	44.85	1	Positive	Female	Student	25	Student	S		SU	SU	No	No	No	No	No	No	No	No		No	No	No	No	No	No	No	No	No	No	0	No	0	No	0	No	0	No	No;No;No;No;No;No;No;No;No	Asymptomatic	Personal vehicle	Private	Never	No	Never	No	Vegetarian	V
102	0.127	0	Negative	Male	Staff	55	Staff	S		SU	SU	No	No	No	No	No	No	No	No		No	No	No	No	No	No	No	No	No	No	0	No	0	No	0	No	0	No	No;No;No;No;No;No;No;No;No	Asymptomatic	Personal vehicle	Private	Never	No	Never	No	Vegetarian	V
103	0.223	0	Negative	Male	Staff	50	staff	S		SU	SU	No	No	No	No	No	No	No	No		No	No	No	No	No	No	No	No	No	No	0	No	0	No	0	No	0	No	No;No;No;No;No;No;No;No;No	Asymptomatic	Personal vehicle	Private	Never	No	Never	No	Vegetarian	V
104	0.07	0	Negative	Male	Staff	45	staff	S		SU	SU	No	No	No	No	No	No	No	No		No	No	No	No	No	No	No	No	No	No	0	No	0	No	0	No	0	No	No;No;No;No;No;No;No;No;No	Asymptomatic	Personal vehicle	Private	Never	No	Never	No	Vegetarian	V
105	0.078	0	Negative	Female	Student	29	Student	S	A+	A	Positive	No	No	No	No	No	No	No	No		No	No	No	No	No	No	No	No	No	No	0	No	0	No	0	No	0	No	No;No;No;No;No;No;No;No;No	Asymptomatic	Personal vehicle	Private	Never	No	Never	No	Vegetarian	V
106	0.096	0	Negative	Female	Student	23	Project staff	S		SU	SU	No	No	No	No	No	No	No	No		No	No	No	No	No	No		SU		SU	2	No	0	No	0	No	0	No	No;No;No;SU;SU;No;No;No;No	Asymptomatic	Personal vehicle	Private	Never	No	Never	No	Vegetarian	V
107	0.079	0	Negative	Male	Staff	48	Govt servant	S	O+	O	Positive	Yes	Yes	Yes	Yes	No	No	Yes	Yes	Negative	Yes	Yes	No	No	Yes	Yes	No	No	No	No	2	No	0	No	0	No	0	No	Yes;No;Yes;No;No;No;No;No;No	Symptomatic	Personal vehicle	Private	Never	No	Never	No	Non vegetarian	NV
108	0.15	0	Negative	Male	Staff	44	staff	S		SU	SU	No	No	No	No	No	No	No	No		No	No	No	No	No	No	No	No	No	No	0	No	0	No	0	No	0	No	No;No;No;No;No;No;No;No;No	Asymptomatic	Personal vehicle	Private	Never	No	Never	No	Vegetarian	V
109	0.137	0	Negative	Male	Staff	30	staff	S		SU	SU	No	No	No	No	No	No	No	No		No	No	No	No	No	No	No	No	No	No	0	No	0	No	0	No	0	No	No;No;No;No;No;No;No;No;No	Asymptomatic	Personal vehicle	Private	Never	No	Never	No	Vegetarian	V
110	0.068	0	Negative	Female	Student	32	Research	S	B+	B	Positive	No	No	No	No	No	No	No	No		No	No	No	No	No	No	No	No	No	No	0	No	1	No	0	No	0	No	No;No;No;No;No;No;No;No;No	Asymptomatic	Personal vehicle	Private	Never	No	Never	No	Vegetarian	V
111	0.064	0	Negative	Male	Others	36	Researcher	S	O+	O	Positive	No	No	No	No	No	No	No	No		No	No	No	No	No	No	No	No	No	No	1	No	0	No	0	No	0	No	No;No;No;No;No;No;No;No;No	Asymptomatic	Personal vehicle	Private	Never	No	Never	No	Vegetarian	V
112	0.105	0	Negative	Male	Student	27	Student	S	B+	B	Positive	No	No	No	No	No	No	No	No		No	No	No	No	No	No	No	No	No	No	1	No	0	No	0	No	0	No	No;No;No;No;No;No;No;No;No	Asymptomatic	Personal vehicle	Private	Never	No	Occasionally	Occ	Occasionally non veg	NV
113	0.07	0	Negative	Male	Student	26	Student	S	A+	A	Positive	No	No	No	No	No	No	No	No		No	No	No	No	No	No	No	No	No	No	0	No	0	No	0	No	0	No	No;No;No;No;No;No;No;No;No	Asymptomatic	Personal vehicle	Private	Never	No	Never	No	Vegetarian	V
114	0.069	0	Negative	Female	Student	24	student	S	A+	A	Positive	No	No	No	No	No	No	No	No		No	No	No	No	No	No	No	No	No	No	2	No	2	No	2	No	1	No	No;No;No;No;No;No;No;No;No	Asymptomatic	Personal vehicle	Private	Never	No	Never	No	Vegetarian	V
115	0.067	0	Negative	Male	Staff	31	GOVT EMPLOYEE	S	O+	O	Positive	No	No	No	No	No	No	No	No		No	No	No	No	No	No	No	No	No	No	0	No	0	No	0	No	0	No	No;No;No;No;No;No;No;No;No	Asymptomatic	Personal vehicle	Private	Never	No	Never	No	Vegetarian	V
116	0.091	0	Negative	Male	Staff	44	Staff	S	O+	O	Positive	Yes	Yes	No	No	No	No	No	No		No	No	No	No	No	No	No	No	No	No	0	No	0	No	0	No	0	No	No;No;No;No;No;No;No;No;No	Asymptomatic	Personal vehicle	Private	Never	No	Never	No	Occasionally non veg	NV
117	0.206	0	Negative	Male	Staff	38	staff	S		SU	SU	No	No	No	No	No	No	No	No		No	No	No	No	No	No	No	No	No	No	0	No	0	No	0	No	0	No	No;No;No;No;No;No;No;No;No	Asymptomatic	Personal vehicle	Private	Never	No	Never	No	Vegetarian	V
118	0.08	0	Negative	Male	Student	22	Student	S	A+	A	Positive	No	No	No	No	No	No	No	No		No	No	No	No	No	No	No	No	No	No	0	No	0	No	0	No	0	No	No;No;No;No;No;No;No;No;No	Asymptomatic	Personal vehicle	Private	Never	No	Never	No	Occasionally non veg	NV
119	0.063	0	Negative	Male	Student	29	Senior Research Fellow	S	O+	O	Positive	No	No	No	No	No	No	No	No		No	No	No	No	No	No	No	No	No	No	3	Yes	2	No	0	No	0	No	No;No;No;No;No;Yes;No;No;No	Symptomatic	Personal vehicle	Private	Never	No	Never	No	Vegetarian	V
120	1.15	1	Positive	Male	Others	29	Student	S	B+	B	Positive	No	No	No	No	No	No	No	No		No	No	No	No	No	No	No	No	No	No	0	No	0	No	0	No	0	No	No;No;No;No;No;No;No;No;No	Asymptomatic	Personal vehicle	Private	Never	No	Never	No	Non vegetarian	NV
121	0.068	0	Negative	Male	Staff	31	SCIENTIST	S	O-	O	Negative	No	No	No	No	No	No	No	No		No	No	No	No	No	No	No	No	No	No	2	No	0	No	0	No	0	No	No;No;No;No;No;No;No;No;No	Asymptomatic	Personal vehicle	Private	Never	No	Never	No	Non vegetarian	NV
122	0.092	0	Negative	Female	Others	25	HOUSE WIFE	S	O+	O	Positive	No	No	No	No	No	No	No	No		No	No	No	No	No	No	No	No	No	No	0	No	0	No	0	No	0	No	No;No;No;No;No;No;No;No;No	Asymptomatic	Personal vehicle	Private	Never	No	Never	No	Non vegetarian	NV
123	0.1	0	Negative	Male	Staff	43	staff	S		SU	SU	No	No	No	No	No	No	No	No		No	No	No	No	No	No	No	No	No	No	0	No	0	No	0	No	0	No	No;No;No;No;No;No;No;No;No	Asymptomatic	Personal vehicle	Private	Never	No	Never	No	Vegetarian	V
124	0.092	0	Negative	Male	Student	30	PhD scholar	S	B+	B	Positive	No	No	No	No	No	No	No	No		No	No	No	No	No	No	No	No	No	No	3	Yes	2	No	2	No	0	No	No;No;No;No;No;Yes;No;No;No	Symptomatic	Personal vehicle	Private	Never	No	Never	No	Occasionally non veg	NV
125	0.073	0	Negative	Male	Staff	53	staff	S		SU	SU	No	No	No	No	No	No	No	No		No	No	No	No	No	No	No	No	No	No	0	No	0	No	0	No	0	No	No;No;No;No;No;No;No;No;No	Asymptomatic	Personal vehicle	Private	Never	No	Never	No	Vegetarian	V
126	0.066	0	Negative	Male	Staff	42	Staff	S		SU	SU	No	No	No	No	No	No	No	No		No	No	No	No	No	No	No	No	No	No	0	No	0	No	0	No	0	No	No;No;No;No;No;No;No;No;No	Asymptomatic	Personal vehicle	Private	Never	No	Never	No	Vegetarian	V
127	0.066	0	Negative	Male	Faculty	38	Scientist	S	B+	B	Positive	No	No	No	No	No	No	No	No		No	No	No	No	No	No	No	No	No	No	0	No	0	No	0	No	0	No	No;No;No;No;No;No;No;No;No	Asymptomatic	Personal vehicle	Private	Never	No	Never	No	Occasionally non veg	NV
128	0.079	0	Negative	Male	Staff	31	EMPLOYEE	S	B+	B	Positive	No	No	No	No	No	No	No	No		No	No	No	No	No	No	No	No	No	No	3	Yes	2	No	2	No	0	No	No;No;No;No;No;Yes;No;No;No	Symptomatic	Personal vehicle	Private	Never	No	Never	No	Vegetarian	V
129	0.1	0	Negative	Female	Student	33	Student	S	B-	B	Negative	No	No	No	No	No	No	No	No		No	No	No	No	No	No	No	No	No	No	2	No	0	No	0	No	0	No	No;No;No;No;No;No;No;No;No	Asymptomatic	Personal vehicle	Private	Never	No	Never	No	Vegetarian	V
130	0.07	0	Negative	Female	Student	27	Student	S	A+	A	Positive	No	No	No	No	No	No	No	No		No	No	No	No	No	No	No	No	No	No	3	Yes	0	No	0	No	0	No	No;No;No;No;No;Yes;No;No;No	Symptomatic	Personal vehicle	Private	Never	No	Never	No	Vegetarian	V
131	0.149	0	Negative	Male	Staff	30	Govt sarvent	S	B+	B	Positive	No	No	No	No	No	No	No	No		No	No	No	No	No	No	No	No	No	No	2	No	2	No	2	No	1	No	No;No;No;No;No;No;No;No;No	Asymptomatic	Personal vehicle	Private	Never	No	Occasionally	Occ	Occasionally non veg	NV
132	0.18	0	Negative	Male	Faculty	34	Scientist	S	A+	A	Positive	No	No	No	No	No	No	No	No		No	No	No	No	No	No	No	No	No	No	0	No	0	No	0	No	0	No	No;No;No;No;No;No;No;No;No	Asymptomatic	Personal vehicle	Private	Never	No	Never	No	Vegetarian	V
133	0.072	0	Negative	Male	Staff	41	Section Officer	S	B+	B	Positive	Yes	Yes	Yes	Yes	No	No	No	No		No	No	No	No	No	No	No	No	No	No	0	No	0	No	0	No	0	No	No;No;No;No;No;No;No;No;No	Asymptomatic	Personal vehicle	Private	Never	No	Never	No	Vegetarian	V
134	0.096	0	Negative	Male	Staff	44	Assistant	OS	A+	A	Positive	No	No	No	No	No	No	No	No		No	No	No	No	No	No	No	No	No	No	0	No	0	No	0	No	0	No	No;No;No;No;No;No;No;No;No	Asymptomatic	Personal vehicle	Private	Never	No	Never	No	Non vegetarian	NV
135	0.096	0	Negative	Male	Faculty	35	Scientist	S	O+	O	Positive	No	No	No	No	No	No	No	No		No	No	No	No	No	No	No	No	No	No	1	No	1	No	0	No	0	No	No;No;No;No;No;No;No;No;No	Asymptomatic	Personal vehicle	Private	Never	No	Occasionally	Occ	Occasionally non veg	NV
136	0.067	0	Negative	Male	Staff	48	Security Guard	OS		SU	SU	No	No	No	No	No	No	No	No		No	No	No	No	No	No	No	No	No	No	0	No	0	No	0	No	0	No	No;No;No;No;No;No;No;No;No	Asymptomatic	Personal vehicle	Private	Sporadic	Yes	Never	No	Vegetarian	V
137	0.071	0	Negative	Male	Staff	48	Staff	S		SU	SU	No	No	No	No	No	No	No	No		No	No	No	No	No	No	No	No	No	No	0	No	0	No	0	No	0	No	No;No;No;No;No;No;No;No;No	Asymptomatic	Personal vehicle	Private	Never	No	Never	No	Vegetarian	V
138	0.077	0	Negative	Male	Staff	65	Security Guard	OS	B+	B	Positive	Yes	Yes	Yes	Yes	No	No	No	No		No	No	No	No	No	No	No	No	No	No	0	No	0	No	0	No	0	No	No;No;No;No;No;No;No;No;No	Asymptomatic	Personal vehicle	Private	Never	No	Never	No	Vegetarian	V
139	0.065	0	Negative	Male	Staff	48	Staff	S		SU	SU	No	No	No	No	No	No	No	No		No	No	No	No	No	No		SU	No	No	0	No	0	No	0	No	0	No	No;No;No;SU;No;No;No;No;No	Asymptomatic	Personal vehicle	Private	Never	No	Never	No	Vegetarian	V
140	0.106	0	Negative	Male	Staff	47	Staff	S		SU	SU	No	No	No	No	No	No	No	No		No	No	No	No	No	No	No	No	No	No	0	No	0	No	0	No	0	No	No;No;No;No;No;No;No;No;No	Asymptomatic	Personal vehicle	Private	Never	No	Never	No	Occasionally non veg	NV
141	0.237	0	Negative	Male	Staff	46	Staff	S		SU	SU	No	No	No	No	No	No	No	No		No	No	No	No	No	No	No	No	No	No	0	No	0	No	0	No	0	No	No;No;No;No;No;No;No;No;No	Asymptomatic	Personal vehicle	Private	Never	No	Never	No	Occasionally non veg	NV
142	0.065	0	Negative	Female	Student	37	Student	S	B+	B	Positive	No	No	No	No	Yes	Yes	No	No		No	No	Yes	Yes	No	No	No	No	No	No	3	Yes	3	Yes	2	No	3	Yes	No;Yes;No;No;No;Yes;Yes;No;Yes	Symptomatic	Personal vehicle	Private	Never	No	Never	No	Occasionally non veg	NV
143	0.077	0	Negative	Male	Student	27	Students	S	A+	A	Positive	No	No	No	No	No	No	No	No		No	No	No	No	No	No	No	No	No	No	0	No	0	No	1	No	0	No	No;No;No;No;No;No;No;No;No	Asymptomatic	Personal vehicle	Private	Never	No	Never	No	Vegetarian	V
144	0.077	0	Negative	Male	Student	27	Ph.D. Student	S	O+	O	Positive	No	No	No	No	No	No	No	No		No	No	No	No	No	No	No	No	No	No	2	No	1	No	1	No	0	No	No;No;No;No;No;No;No;No;No	Asymptomatic	Cycle	Private	Never	No	Never	No	Vegetarian	V
145	0.07	0	Negative	Male	Student	27	Student	S	B+	B	Positive	No	No	No	No	No	No	No	No		No	No	No	No	No	No	No	No	No	No	0	No	0	No	0	No	0	No	No;No;No;No;No;No;No;No;No	Asymptomatic	Personal vehicle	Private	Never	No	Never	No	Non vegetarian	NV
146	0.076	0	Negative	Male	Student	30	PhD Scholar	S	B+	B	Positive	No	No	No	No	No	No	No	No		No	No	No	No	No	No		SU		SU	0	No	0	No	0	No	0	No	No;No;No;SU;SU;No;No;No;No	Asymptomatic	Personal vehicle	Private	Never	No	Never	No	Vegetarian	V
147	0.069	0	Negative	Male	Staff	37	Technical Officer	S	B+	B	Positive	No	No	No	No	No	No	No	No		No	No	No	No	No	No	No	No	No	No	0	No	0	No	0	No	0	No	No;No;No;No;No;No;No;No;No	Asymptomatic	Personal vehicle	Private	Never	No	Never	No	Occasionally non veg	NV
148	0.068	0	Negative	Male	Staff	51	Staff	S	A+	A	Positive	No	No	No	No	No	No	No	No		No	No	No	No	No	No	No	No	No	No	0	No	0	No	0	No	0	No	No;No;No;No;No;No;No;No;No	Asymptomatic	Personal vehicle	Private	Never	No	Never	No	Occasionally non veg	NV
149	0.067	0	Negative	Male	Faculty	43	Scientist	S	A+	A	Positive	No	No	Yes	Yes	No	No	No	No		No	No	No	No	No	No	No	No	No	No	0	No	0	No	0	No	0	No	No;No;No;No;No;No;No;No;No	Asymptomatic	Personal vehicle	Private	Never	No	Often	Yes	Vegetarian	V
150	0.065	0	Negative	Male	Faculty	36	Scientist	S	B+	B	Positive	No	No	No	No	No	No	No	No		No	No	No	No	No	No	No	No	No	No	0	No	0	No	0	No	0	No	No;No;No;No;No;No;No;No;No	Asymptomatic	Personal vehicle	Private	Never	No	Occasionally	Occ	Non vegetarian	NV
151	7.92	1	Positive	Male	Staff	53	Staff	S		SU	SU	No	No	No	No	No	No	No	No		No	No	No	No	No	No	No	No	No	No	0	No	0	No	0	No	0	No	No;No;No;No;No;No;No;No;No	Asymptomatic	Personal vehicle	Private	Never	No	Never	No	Vegetarian	V
152	0.076	0	Negative	Male	Staff	36	Staff	S	B+	B	Positive	No	No	No	No	No	No	No	No		No	No	No	No	No	No	No	No	No	No	0	No	0	No	0	No	0	No	No;No;No;No;No;No;No;No;No	Asymptomatic	Personal vehicle	Private	Never	No	Never	No	Vegetarian	V
153	0.069	0	Negative	Female	Others	30	Government	S	A+	A	Positive	No	No	No	No	No	No	No	No		No	No	No	No	No	No	No	No	No	No	1	No	1	No	0	No	0	No	No;No;No;No;No;No;No;No;No	Asymptomatic	Personal vehicle	Private	Never	No	Never	No	Vegetarian	V
154	0.073	0	Negative	Male	Staff	40	Principal Scientist	S	AB+	AB	Positive	No	No	No	No	No	No	No	No		No	No	No	No	Yes	Yes	No	No	No	No	2	No	1	No	1	No	1	No	No;No;Yes;No;No;No;No;No;No	Symptomatic	Personal vehicle	Private	Never	No	Occasionally	Occ	Vegetarian	V
155	8.64	1	Positive	Male	Faculty	35	Research	S	B+	B	Positive	Yes	Yes	No	No	No	No	No	No		No	No	No	No	No	No	No	No	No	No	0	No	0	No	0	No	0	No	No;No;No;No;No;No;No;No;No	Asymptomatic	Personal vehicle	Private	Never	No	Never	No	Non vegetarian	NV
156	0.072	0	Negative	Male	Staff	49	Doctor	S	O-	O	Negative	Yes	Yes	No	No	No	No	No	No		No	No	No	No	No	No	No	No	No	No	0	No	0	No	0	No	0	No	No;No;No;No;No;No;No;No;No	Asymptomatic	Personal vehicle	Private	Never	No	Never	No	Vegetarian	V
157	0.074	0	Negative	Male	Staff	56	Staff	S		SU	SU	Yes	Yes	Yes	Yes	Yes	Yes	No	No		No	No	No	No	No	No	No	No	No	No	0	No	0	No	0	No	0	No	No;No;No;No;No;No;No;No;No	Asymptomatic	Personal vehicle	Private	Never	No	Never	No	Non vegetarian	NV
158	0.069	0	Negative	Female	Others	51	House wife	S		SU	SU	No	No	No	No	No	No	No	No		No	No	No	No	No	No	No	No	No	No	0	No	0	No	0	No	0	No	No;No;No;No;No;No;No;No;No	Asymptomatic	Personal vehicle	Private	Never	No	Never	No	Vegetarian	V
159	0.067	0	Negative	Male	Others	26	Student	S		SU	SU	No	No	No	No	No	No	No	No		No	No	No	No	No	No	No	No	No	No	0	No	0	No	0	No	0	No	No;No;No;No;No;No;No;No;No	Asymptomatic	Personal vehicle	Private	Never	No	Never	No	Vegetarian	V
160	0.064	0	Negative	Male	Staff	44	Administration staff	S	B+	B	Positive	No	No	No	No	No	No	No	No		No	No	No	No	No	No	No	No	No	No	0	No	0	No	0	No	0	No	No;No;No;No;No;No;No;No;No	Asymptomatic	Personal vehicle	Private	Never	No	Never	No	Vegetarian	V
161	0.069	0	Negative	Male	Staff	43	Staff	S		SU	SU	No	No	No	No	No	No	No	No		No	No	No	No	No	No	No	No	No	No	0	No	0	No	0	No	0	No	No;No;No;No;No;No;No;No;No	Asymptomatic	Personal vehicle	Private	Never	No	Never	No	Occasionally non veg	NV
162	32.15	1	Positive	Male	Student	36	Research and Development	S	B+	B	Positive	No	No	No	No	No	No	No	No		No	No	No	No	No	No	No	No	No	No	0	No	0	No	0	No	0	No	No;No;No;No;No;No;No;No;No	Asymptomatic	Personal vehicle	Private	Never	No	Occasionally	Occ	Vegetarian	V
163	0.083	0	Negative	Male	Staff	44	Staff	S	O+	O	Positive	No	No	No	No	No	No	No	No		No	No	No	No	No	No	No	No	No	No	0	No	0	No	0	No	0	No	No;No;No;No;No;No;No;No;No	Asymptomatic	Personal vehicle	Private	Never	No	Never	No	Occasionally non veg	NV
164	0.069	0	Negative	Male	Staff	54	Principal Scientist	S	O+	O	Positive	No	No	No	No	No	No	No	No		No	No	No	No	No	No	No	No	No	No	0	No	0	No	0	No	0	No	No;No;No;No;No;No;No;No;No	Asymptomatic	Personal vehicle	Private	Never	No	Never	No	Vegetarian	V
165	0.217	0	Negative	Male	Staff	37	Security Supervisor	OS	B+	B	Positive	No	No	No	No	No	No	No	No		No	No	No	No	No	No	No	No	No	No	0	No	0	No	0	No	0	No	No;No;No;No;No;No;No;No;No	Asymptomatic	Personal vehicle	Private	Never	No	Never	No	Vegetarian	V
166	2.04	1	Positive	Male	Others	30	Scientist	S	B+	B	Positive	No	No	No	No	No	No	No	No		No	No	No	No	No	No	No	No	No	No	0	No	0	No	0	No	0	No	No;No;No;No;No;No;No;No;No	Asymptomatic	Personal vehicle	Private	Never	No	Occasionally	Occ	Vegetarian	V
167	0.186	0	Negative	Male	Staff	46	Technical	S	A+	A	Positive	No	No	No	No	No	No	No	No		No	No	No	No	No	No	No	No	No	No	0	No	0	No	0	No	0	No	No;No;No;No;No;No;No;No;No	Asymptomatic	Personal vehicle	Private	Never	No	Never	No	Occasionally non veg	NV
168	0.139	0	Negative	Male	Contractual Staff	50	Contract employee	OS	B+	B	Positive	No	No	No	No	No	No	No	No		No	No	No	No	No	No	No	No	No	No	0	No	0	No	0	No	0	No	No;No;No;No;No;No;No;No;No	Asymptomatic	Personal vehicle	Private	Never	No	Never	No	Vegetarian	V
169	0.069	0	Negative	Male	Faculty	31	Scientist (Government Servant)	S		SU	SU	No	No	No	No	No	No	No	No		No	No	No	No	No	No		SU		SU	1	No	0	No	1	No	0	No	No;No;No;SU;SU;No;No;No;No	Asymptomatic	Personal vehicle	Private	Never	No	Never	No	Occasionally non veg	NV
170	0.069	0	Negative	Female	Others	26	Freelancer	S		SU	SU	No	No	No	No	No	No	No	No		No	No	No	No	No	No		SU		SU	1	No	1	No	0	No	0	No	No;No;No;SU;SU;No;No;No;No	Asymptomatic	Personal vehicle	Private	Never	No	Never	No	Occasionally non veg	NV
171	0.067	0	Negative	Male	Faculty	32	Scientist	S	A+	A	Positive	No	No	No	No	No	No	No	No		No	No	No	No	No	No	No	No	No	No	2	No	1	No	0	No	0	No	No;No;No;No;No;No;No;No;No	Asymptomatic	Personal vehicle	Private	Never	No	Never	No	Vegetarian	V
172	0.066	0	Negative	Male	Faculty	56	Scientist	S	A+	A	Positive	No	No	No	No	No	No	No	No		No	No	No	No	No	No	No	No	No	No	0	No	0	No	0	No	0	No	No;No;No;No;No;No;No;No;No	Asymptomatic	Personal vehicle	Private	Never	No	Never	No	Non vegetarian	NV
173	0.07	0	Negative	Male	Staff	48	Staff	S	B+	B	Positive	Yes	Yes	Yes	Yes	Yes	Yes	No	No		No	No	No	No	No	No	No	No	No	No	0	No	0	No	0	No	0	No	No;No;No;No;No;No;No;No;No	Asymptomatic	Personal vehicle	Private	Never	No	Never	No	Vegetarian	V
174	0.13	0	Negative	Male	Staff	58	Technician	S	O+	O	Positive	No	No	Yes	Yes	No	No	No	No		No	No	No	No	No	No	No	No	No	No	0	No	0	No	0	No	0	No	No;No;No;No;No;No;No;No;No	Asymptomatic	Personal vehicle	Private	Never	No	Never	No	Occasionally non veg	NV
175	0.065	0	Negative	Male	Staff	57	House wife	S		SU	SU	No	No	No	No	No	No	No	No		No	No	No	No	No	No	No	No	No	No	0	No	0	No	0	No	0	No	No;No;No;No;No;No;No;No;No	Asymptomatic	Personal vehicle	Private	Never	No	Never	No	Vegetarian	V
176	0.075	0	Negative	Female	Staff	29	Student	S		SU	SU	No	No	No	No	No	No	No	No		No	No	No	No	No	No	No	No	No	No	0	No	0	No	0	No	0	No	No;No;No;No;No;No;No;No;No	Asymptomatic	Personal vehicle	Private	Never	No	Never	No	Vegetarian	V
177	0.12	0	Negative	Female	Staff	37	House wife	S		SU	SU	No	No	No	No	No	No	No	No		No	No	No	No	No	No	No	No	No	No	0	No	0	No	0	No	0	No	No;No;No;No;No;No;No;No;No	Asymptomatic	Personal vehicle	Private	Never	No	Never	No	Vegetarian	V
178	0.124	0	Negative	Female	Staff	27	Admin Staff	S	A+	A	Positive	No	No	No	No	No	No	No	No		No	No	No	No	No	No	No	No	No	No	0	No	0	No	0	No	0	No	No;No;No;No;No;No;No;No;No	Asymptomatic	Personal vehicle	Private	Never	No	Never	No	Vegetarian	V
179	0.066	0	Negative	Male	Faculty	45	Scientist	S	B+	B	Positive	No	No	No	No	No	No	No	No		No	No	No	No	No	No	No	No	No	No	0	No	0	No	0	No	0	No	No;No;No;No;No;No;No;No;No	Asymptomatic	Personal vehicle	Private	Never	No	Never	No	Non vegetarian	NV
180	0.182	0	Negative	Male	Faculty	49	Faculty	S	B+	B	Positive	No	No	No	No	No	No	No	No		No	No	No	No	No	No	No	No	No	No	0	No	0	No	0	No	0	No	No;No;No;No;No;No;No;No;No	Asymptomatic	Personal vehicle	Private	Never	No	Never	No	Vegetarian	V
181	0.066	0	Negative	Female	Student	28	Research scholar	S	O+	O	Positive	No	No	No	No	No	No	No	No		No	No	No	No	No	No	No	No	No	No	1	No	1	No	1	No	0	No	No;No;No;No;No;No;No;No;No	Asymptomatic	Personal vehicle	Private	Never	No	Never	No	Vegetarian	V
182	0.066	0	Negative	Male	Others	57	Scientist	S	O+	O	Positive	Yes	Yes	No	No	No	No	No	No		No	No	No	No	No	No	No	No	No	No	0	No	0	No	0	No	0	No	No;No;No;No;No;No;No;No;No	Asymptomatic	Personal vehicle	Private	Never	No	Never	No	Non vegetarian	NV
183	0.068	0	Negative	Male	Staff	53	Staff	S		SU	SU	No	No	No	No	No	No	No	No		No	No	No	No	No	No	No	No	No	No	0	No	0	No	0	No	0	No	No;No;No;No;No;No;No;No;No	Asymptomatic	Personal vehicle	Private	Never	No	Never	No	Vegetarian	V
184	0.065	0	Negative	Male	Staff	61	Staff	S	A+	A	Positive	Yes	Yes	No	No	No	No	No	No		No	No	No	No	No	No	No	No	No	No	0	No	0	No	0	No	0	No	No;No;No;No;No;No;No;No;No	Asymptomatic	Personal vehicle	Private	Never	No	Never	No	Vegetarian	V
185	0.126	0	Negative	Female	Others	21	Student	S		SU	SU	No	No	No	No	No	No	No	No		No	No	No	No	No	No	No	No	No	No	0	No	0	No	0	No	0	No	No;No;No;No;No;No;No;No;No	Asymptomatic	Personal vehicle	Private	Never	No	Never	No	Vegetarian	V
186	0.142	0	Negative	Female	Others	40	House wife	S		SU	SU	No	No	No	No	No	No	No	No		No	No	No	No	No	No	No	No	No	No	0	No	0	No	0	No	0	No	No;No;No;No;No;No;No;No;No	Asymptomatic	Personal vehicle	Private	Never	No	Never	No	Vegetarian	V
187	0.072	0	Negative	Female	Student	23	Student	S	B-	B	Negative	No	No	No	No	No	No	No	No		No	No	No	No	No	No	No	No	No	No	0	No	0	No	0	No	0	No	No;No;No;No;No;No;No;No;No	Asymptomatic	Personal vehicle	Private	Never	No	Never	No	Non vegetarian	NV
188	0.067	0	Negative	Female	Others	51	House wife	S		SU	SU	No	No	No	No	No	No	No	No		No	No	No	No	No	No	No	No	No	No	0	No	0	No	0	No	0	No	No;No;No;No;No;No;No;No;No	Asymptomatic	Personal vehicle	Private	Never	No	Never	No	Vegetarian	V
189	0.11	0	Negative	Male	Staff	56	Service	S	O+	O	Positive	Yes	Yes	Yes	Yes	No	No	No	No		No	No	No	No	No	No	No	No	No	No	1	No	0	No	0	No	0	No	No;No;No;No;No;No;No;No;No	Asymptomatic	Personal vehicle	Private	Never	No	Never	No	Occasionally non veg	NV
190	0.09	0	Negative	Male	Staff	53	Scientists	S	B+	B	Positive	No	No	No	No	No	No	No	No		No	No	No	No	No	No	No	No	No	No	1	No	0	No	0	No	0	No	No;No;No;No;No;No;No;No;No	Asymptomatic	Personal vehicle	Private	Never	No	Occasionally	Occ	Occasionally non veg	NV
191	0.09	0	Negative	Female	Staff	58	Scientist	S	A+	A	Positive	No	No	No	No	No	No	No	No		No	No	No	No	No	No	No	No	No	No	2	No	0	No	0	No	1	No	No;No;No;No;No;No;No;No;No	Asymptomatic	Personal vehicle	Private	Never	No	Never	No	Vegetarian	V
192	0.09	0	Negative	Male	Others	55	Faculty	S	O-	O	Negative	Yes	Yes	No	No	No	No	No	No		No	No	No	No	No	No	No	No	No	No	1	No	0	No	0	No	0	No	No;No;No;No;No;No;No;No;No	Asymptomatic	Personal vehicle	Private	Never	No	Occasionally	Occ	Occasionally non veg	NV
193	0.1	0	Negative	Male	Student	29	Student	S	A+	A	Positive	No	No	No	No	No	No	No	No		No	No	No	No	No	No	No	No	No	No	0	No	0	No	0	No	0	No	No;No;No;No;No;No;No;No;No	Asymptomatic	Personal vehicle	Private	Never	No	Often	Yes	Non vegetarian	NV
194	0.09	0	Negative	Male	Staff	44	Service	S	AB+	AB	Positive	No	No	No	No	No	No	No	No		No	No	No	No	No	No	No	No	No	No	1	No	0	No	1	No	0	No	No;No;No;No;No;No;No;No;No	Asymptomatic	Scooter	Private	Sporadic	Yes	Often	Yes	Occasionally non veg	NV
195	0.1	0	Negative	Female	Others	43	Teacher	S	B+	B	Positive	No	No	No	No	No	No	No	No		No	No	No	No	No	No	No	No	No	No	2	No	0	No	1	No	0	No	No;No;No;No;No;No;No;No;No	Asymptomatic	Personal vehicle	Private	Never	No	Occasionally	Occ	Vegetarian	V
196	0.09	0	Negative	Male	Staff	55	Security Officer	OS	A+	A	Positive	No	No	No	No	No	No	No	No		No	No	No	No	Yes	Yes	No	No	No	No	3	Yes	0	No	0	No	0	No	No;No;Yes;No;No;Yes;No;No;No	Symptomatic	Personal vehicle	Private	Never	No	Occasionally	Occ	Occasionally non veg	NV
197	0.1	0	Negative	Female	Others	23	STUDENT	S	AB+	AB	Positive	No	No	No	No	No	No	No	No		No	No	No	No	No	No	No	No	No	No	0	No	0	No	0	No	0	No	No;No;No;No;No;No;No;No;No	Asymptomatic	Personal vehicle	Private	Never	No	Never	No	Vegetarian	V
198	0.08	0	Negative	Female	Others	50	TEACHER	S	AB+	AB	Positive	No	No	No	No	No	No	No	No		No	No	No	No	No	No	No	No	No	No	0	No	0	No	0	No	0	No	No;No;No;No;No;No;No;No;No	Asymptomatic	Personal vehicle	Private	Never	No	Never	No	Vegetarian	V
199	0.09	0	Negative	Male	Staff	24	Service	S		SU	SU	No	No	No	No	No	No	No	No		No	No	No	No	No	No	No	No	No	No	1	No	0	No	0	No	0	No	No;No;No;No;No;No;No;No;No	Asymptomatic	Personal vehicle	Private	Never	No	Never	No	Occasionally non veg	NV
200	0.1	0	Negative	Male	Others	20	STUDENT	S	B+	B	Positive	No	No	No	No	No	No	No	No		No	No	No	No	No	No	No	No	No	No	2	No	0	No	0	No	0	No	No;No;No;No;No;No;No;No;No	Asymptomatic	Personal vehicle	Private	Never	No	Never	No	Non vegetarian	NV
201	0.08	0	Negative	Male	Staff	51	Scientist	S	B+	B	Positive	Yes	Yes	No	No	No	No	No	No		No	No	No	No	No	No	No	No	No	No	3	Yes	1	No	0	No	0	No	No;No;No;No;No;Yes;No;No;No	Symptomatic	Personal vehicle	Private	Never	No	Occasionally	Occ	Occasionally non veg	NV
202	0.22	0	Negative	Male	Staff	57	Govt servent	S	B+	B	Positive	Yes	Yes	No	No	No	No	No	No		No	No	No	No	No	No	No	No	No	No	1	No	0	No	0	No	0	No	No;No;No;No;No;No;No;No;No	Asymptomatic	Personal vehicle	Private	Never	No	Occasionally	Occ	Vegetarian	V
203	0.09	0	Negative	Female	Others	52	House Wife	S	B+	B	Positive	No	No	Yes	Yes	No	No	No	No		No	No	No	No	No	No	No	No	No	No	2	No	2	No	1	No	0	No	No;No;No;No;No;No;No;No;No	Asymptomatic	Personal vehicle	Private	Never	No	Never	No	Vegetarian	V
204	0.11	0	Negative	Male	Student	21	Student	S	B+	B	Positive	No	No	No	No	No	No	No	No		No	No	No	No	No	No	No	No	No	No	0	No	0	No	0	No	0	No	No;No;No;No;No;No;No;No;No	Asymptomatic	Personal vehicle	Private	Never	No	Never	No	Vegetarian	V
205	0.08	0	Negative	Female	Faculty	45	Nil	S	A+	A	Positive	No	No	No	No	No	No	No	No		No	No	No	No	No	No	No	No	No	No	0	No	0	No	0	No	1	No	No;No;No;No;No;No;No;No;No	Asymptomatic	Personal vehicle	Private	Never	No	Occasionally	Occ	Occasionally non veg	NV
206	0.17	0	Negative	Male	Staff	51	GOVT JOB	S	B+	B	Positive	No	No	Yes	Yes	No	No	No	No		No	No	No	No	No	No	No	No	No	No	3	Yes	2	No	1	No	1	No	No;No;No;No;No;Yes;No;No;No	Symptomatic	Personal vehicle	Private	Never	No	Occasionally	Occ	Vegetarian	V
207	0.09	0	Negative	Female	Others	52	Home maker	S		SU	SU	No	No	No	No	No	No	No	No		No	No	No	No	No	No	No	No	No	No	1	No	0	No	0	No	0	No	No;No;No;No;No;No;No;No;No	Asymptomatic	Personal vehicle	Private	Never	No	Never	No	Vegetarian	V
208	0.09	0	Negative	Male	Staff	59	Govt. Job	S	AB+	AB	Positive	No	No	No	No	No	No	No	No		No	No	No	No	No	No	No	No	No	No	1	No	2	No	1	No	1	No	No;No;No;No;No;No;No;No;No	Asymptomatic	Personal vehicle	Private	Never	No	Occasionally	Occ	Occasionally non veg	NV
209	56.08	1	Positive	Female	Staff	37	Scientist	S	A+	A	Positive	No	No	No	No	No	No	No	No		No	No	No	No	Yes	Yes	No	No	No	No	2	No	2	No	1	No	0	No	No;No;Yes;No;No;No;No;No;No	Symptomatic	Personal vehicle	Private	Never	No	Never	No	Vegetarian	V
210	1.32	1	Positive	Female	Others	29	No	S	A+	A	Positive	No	No	No	No	No	No	No	No		No	No	No	No	Yes	Yes	No	No	No	No	0	No	0	No	0	No	0	No	No;No;Yes;No;No;No;No;No;No	Symptomatic	Personal vehicle	Private	Never	No	Never	No	Vegetarian	V
211	2.71	1	Positive	Female	Others	22	No	S	B+	B	Positive	No	No	No	No	No	No	No	No		No	No	No	No	No	No	No	No	No	No	0	No	0	No	0	No	0	No	No;No;No;No;No;No;No;No;No	Asymptomatic	Personal vehicle	Private	Never	No	Never	No	Vegetarian	V
212	0.09	0	Negative	Male	Contractual Staff	29	CONTRACTUAL STAFF AT CBRI ROORKEE	OS	O+	O	Positive	No	No	No	No	No	No	No	No		No	No	No	No	No	No	May be	Yes	No	No	1	No	0	No	0	No	0	No	No;No;No;Yes;No;No;No;No;No	Symptomatic	Personal vehicle	Private	Never	No	Never	No	Vegetarian	V
213	0.08	0	Negative	Male	Faculty	56	Chief Scientist	S	O+	O	Positive	No	No	No	No	No	No	No	No		No	No	No	No	No	No	No	No	No	No	0	No	0	No	0	No	0	No	No;No;No;No;No;No;No;No;No	Asymptomatic	Personal vehicle	Private	Sporadic	Yes	Often	Yes	Non vegetarian	NV
214	0.1	0	Negative	Male	Staff	46	Service	S	B-	B	Negative	No	No	No	No	No	No	No	No		No	No	No	No	No	No	No	No	No	No	2	No	2	No	0	No	0	No	No;No;No;No;No;No;No;No;No	Asymptomatic	Personal vehicle	Private	Never	No	Never	No	Vegetarian	V
215	0.08	0	Negative	Male	Staff	36	Scientist	S	O+	O	Positive	No	No	No	No	No	No	No	No		No	No	No	No	No	No	No	No	No	No	2	No	0	No	1	No	0	No	No;No;No;No;No;No;No;No;No	Asymptomatic	Personal vehicle	Private	Never	No	Never	No	Vegetarian	V
216	0.1	0	Negative	Female	Others	53	House wife	S	B+	B	Positive	No	No	No	No	Yes	Yes	No	No		No	No	No	No	No	No	No	No	No	No	4	Yes	2	No	1	No	2	No	No;No;No;No;No;Yes;No;No;No	Symptomatic	Personal vehicle	Private	Never	No	Never	No	Occasionally non veg	NV
217	0.08	0	Negative	Male	Others	23	No.	S	A+	A	Positive	No	No	No	No	No	No	No	No		No	No	No	No	No	No	No	No	No	No	2	No	3	Yes	1	No	1	No	No;No;No;No;No;No;Yes;No;No	Symptomatic	Personal vehicle	Private	Never	No	Never	No	Occasionally non veg	NV
218	0.1	0	Negative	Male	Staff	60	Council service	S	O+	O	Positive	No	No	No	No	No	No	No	No		No	No	No	No	No	No	No	No	No	No	0	No	0	No	0	No	0	No	No;No;No;No;No;No;No;No;No	Asymptomatic	Personal vehicle	Private	Never	No	Never	No	Vegetarian	V
219	0.1	0	Negative	Male	Staff	36	Service	S	A+	A	Positive	No	No	No	No	No	No	No	No		No	No	No	No	No	No	No	No	No	No	0	No	0	No	0	No	0	No	No;No;No;No;No;No;No;No;No	Asymptomatic	Personal vehicle	Private	Sporadic	Yes	Occasionally	Occ	Non vegetarian	NV
220	0.09	0	Negative	Male	Staff	39	CSIR Employee	S		SU	SU	No	No	No	No	No	No	No	No		No	No	No	No	No	No	No	No	No	No	0	No	0	No	0	No	0	No	No;No;No;No;No;No;No;No;No	Asymptomatic	Personal vehicle	Private	Never	No	Often	Yes	Vegetarian	V
221	0.12	0	Negative	Male	Staff	52	Service	S	B+	B	Positive	No	No	No	No	No	No	No	No		No	No	No	No	No	No	No	No	No	No	2	No	0	No	0	No	0	No	No;No;No;No;No;No;No;No;No	Asymptomatic	Personal vehicle	Private	Never	No	Never	No	Vegetarian	V
222	0.21	0	Negative	Female	Others	46	HOUSE WIFE	S		SU	SU	Yes	Yes	No	No	No	No	No	No		No	No	No	No	No	No	No	No	No	No	2	No	0	No	0	No	0	No	No;No;No;No;No;No;No;No;No	Asymptomatic	Personal vehicle	Private	Never	No	Never	No	Vegetarian	V
223	0.08	0	Negative	Male	Staff	58	Service	S	B+	B	Positive	No	No	No	No	No	No	No	No		No	No	No	No	No	No	No	No	No	No	0	No	0	No	0	No	0	No	No;No;No;No;No;No;No;No;No	Asymptomatic	Personal vehicle	Private	Never	No	Occasionally	Occ	Vegetarian	V
224	0.09	0	Negative	Male	Staff	47	Govt. Job	S	AB+	AB	Positive	No	No	No	No	No	No	No	No		No	No	Yes	Yes	No	No	No	No	No	No	4	Yes	0	No	0	No	0	No	No;Yes;No;No;No;Yes;No;No;No	Symptomatic	Personal vehicle	Private	Never	No	Never	No	Non vegetarian	NV
225	0.09	0	Negative	Female	Student	21	STUDENT	S		SU	SU	No	No	No	No	No	No	No	No		No	No	No	No	No	No	No	No	No	No	0	No	0	No	0	No	0	No	No;No;No;No;No;No;No;No;No	Asymptomatic	Personal vehicle	Private	Never	No	Never	No	Vegetarian	V
226	0.09	0	Negative	Male	Faculty	31	Government service	S	B+	B	Positive	No	No	No	No	No	No	No	No		No	No	No	No	No	No	No	No	No	No	0	No	0	No	0	No	0	No	No;No;No;No;No;No;No;No;No	Asymptomatic	Personal vehicle	Private	Never	No	Never	No	Non vegetarian	NV
227	0.1	0	Negative	Female	Others	26	Home maker	S	B+	B	Positive	No	No	No	No	No	No	No	No		No	No	No	No	No	No	No	No	May be	Yes	1	No	1	No	1	No	1	No	No;No;No;No;Yes;No;No;No;No	Symptomatic	Personal vehicle	Private	Never	No	Never	No	Non vegetarian	NV
228	0.08	0	Negative	Female	Staff	45	Government Service	S	A+	A	Positive	Yes	Yes	No	No	No	No	No	No		No	No	No	No	No	No	No	No	No	No	0	No	0	No	0	No	0	No	No;No;No;No;No;No;No;No;No	Asymptomatic	Personal vehicle	Private	Never	No	Never	No	Vegetarian	V
229	0.1	0	Negative	Male	Contractual Staff	26	Jrf	S		SU	SU	No	No	Yes	Yes	No	No	No	No		No	No	Yes	Yes	No	No	No	No	No	No	2	No	2	No	2	No	0	No	No;Yes;No;No;No;No;No;No;No	Symptomatic	Shared bike	SU	Never	No	Occasionally	Occ	Vegetarian	V
230	0.1	0	Negative	Male	Student	26	Research Scholar (Student)	S	B+	B	Positive	No	No	No	No	No	No	No	No		No	No	No	No	No	No	No	No	No	No	2	No	0	No	2	No	0	No	No;No;No;No;No;No;No;No;No	Asymptomatic	Personal vehicle	Private	Never	No	Occasionally	Occ	Vegetarian	V
231	0.09	0	Negative	Female	Others	34	Housewife	S		SU	SU	No	No	No	No	No	No	No	No		No	No	No	No	No	No	No	No	No	No	0	No	0	No	1	No	0	No	No;No;No;No;No;No;No;No;No	Asymptomatic	Personal vehicle	Private	Never	No	Never	No	Vegetarian	V
232	7.39	1	Positive	Male	Staff	54	Service	S	O+	O	Positive	No	No	No	No	No	No	No	No		No	No	No	No	No	No	No	No	No	No	0	No	0	No	0	No	0	No	No;No;No;No;No;No;No;No;No	Asymptomatic	Personal vehicle	Private	Never	No	Never	No	Vegetarian	V
233	1.35	1	Positive	Female	Others	53	House Wife	S	B-	B	Negative	No	No	No	No	No	No	No	No		No	No	No	No	No	No	No	No	No	No	0	No	0	No	0	No	0	No	No;No;No;No;No;No;No;No;No	Asymptomatic	Personal vehicle	Private	Never	No	Never	No	Vegetarian	V
234	0.09	0	Negative	Male	Others	21	Student	S	O+	O	Positive	No	No	No	No	No	No	No	No		No	No	No	No	No	No	No	No	No	No	0	No	0	No	0	No	0	No	No;No;No;No;No;No;No;No;No	Asymptomatic	Personal vehicle	Private	Never	No	Never	No	Vegetarian	V
235	6.38	1	Positive	Male	Others	18	Student	S	O+	O	Positive	No	No	No	No	No	No	No	No		No	No	No	No	No	No	No	No	No	No	0	No	0	No	0	No	0	No	No;No;No;No;No;No;No;No;No	Asymptomatic	Personal vehicle	Private	Never	No	Never	No	Vegetarian	V
236	0.09	0	Negative	Male	Staff	47	Sr Pr Scientist (Govt job)	S	O+	O	Positive	No	No	No	No	No	No	No	No		No	No	No	No	No	No	No	No	No	No	1	No	0	No	0	No	0	No	No;No;No;No;No;No;No;No;No	Asymptomatic	Personal vehicle	Private	Never	No	Never	No	Vegetarian	V
237	0.08	0	Negative	Male	Staff	57	Service	S	AB+	AB	Positive	No	No	No	No	Yes	Yes	No	No		No	No	No	No	No	No	No	No	No	No	1	No	1	No	1	No	1	No	No;No;No;No;No;No;No;No;No	Asymptomatic	Personal vehicle	Private	Never	No	Occasionally	Occ	Occasionally non veg	NV
238	0.09	0	Negative	Male	Staff	36	Scientiat	S	O+	O	Positive	No	No	No	No	No	No	No	No		No	No	No	No	No	No	No	No	No	No	0	No	0	No	0	No	0	No	No;No;No;No;No;No;No;No;No	Asymptomatic	Personal vehicle	Private	Regular	Yes	Occasionally	Occ	Non vegetarian	NV
239	0.08	0	Negative	Female	Others	34	House wife	S	A+	A	Positive	No	No	No	No	No	No	No	No		No	No	No	No	No	No	No	No	No	No	0	No	0	No	0	No	0	No	No;No;No;No;No;No;No;No;No	Asymptomatic	Personal vehicle	Private	Never	No	Often	Yes	Non vegetarian	NV
240	0.1	0	Negative	Female	Staff	54	Domestic	S	O+	O	Positive	Yes	Yes	Yes	Yes	No	No	No	No		No	No	No	No	No	No	No	No	No	No	1	No	2	No	2	No	1	No	No;No;No;No;No;No;No;No;No	Asymptomatic	Personal vehicle	Private	Never	No	Never	No	Vegetarian	V
241	0.1	0	Negative	Male	Faculty	35	Scientist	S		SU	SU	No	No	No	No	No	No	No	No		No	No	No	No	No	No	No	No	No	No	1	No	1	No	0	No	0	No	No;No;No;No;No;No;No;No;No	Asymptomatic	Personal vehicle	Private	Never	No	Occasionally	Occ	Occasionally non veg	NV
242	0.09	0	Negative	Male	Staff	59	Service in CSIR-CBRI	S	O+	O	Positive	No	No	No	No	No	No	No	No		No	No	No	No	No	No	No	No	No	No	3	Yes	1	No	1	No	1	No	No;No;No;No;No;Yes;No;No;No	Symptomatic	Personal vehicle	Private	Never	No	Occasionally	Occ	Occasionally non veg	NV
243	0.1	0	Negative	Male	Faculty	31	Scientist	S	AB+	AB	Positive	No	No	No	No	No	No	No	No		No	No	No	No	No	No	No	No	No	No	3	Yes	2	No	1	No	0	No	No;No;No;No;No;Yes;No;No;No	Symptomatic	Personal vehicle	Private	Sporadic	Yes	Occasionally	Occ	Occasionally non veg	NV
244	0.1	0	Negative	Female	Faculty	31	Scientist	S	B+	B	Positive	No	No	No	No	No	No	No	No		No	No	No	No	No	No	No	No	No	No	3	Yes	4	Yes	2	No	1	No	No;No;No;No;No;Yes;Yes;No;No	Symptomatic	Personal vehicle	Private	Never	No	Never	No	Vegetarian	V
245	0.09	0	Negative	Male	Others	32	Business	S		SU	SU	No	No	No	No	No	No	No	No		No	No	No	No	No	No	No	No	No	No	3	Yes	1	No	0	No	0	No	No;No;No;No;No;Yes;No;No;No	Symptomatic	Personal vehicle	Private	Never	No	Never	No	Vegetarian	V
246	0.1	0	Negative	Female	Others	30	Tracher	S		SU	SU	No	No	No	No	No	No	No	No		No	No	No	No	No	No	No	No	No	No	3	Yes	1	No	1	No	0	No	No;No;No;No;No;Yes;No;No;No	Symptomatic	Personal vehicle	Private	Never	No	Never	No	Vegetarian	V
247	0.08	0	Negative	Female	Staff	51	Scientists	S	B+	B	Positive	No	No	Yes	Yes	No	No	No	No		No	No	No	No	No	No	No	No	No	No	3	Yes	3	Yes	1	No	1	No	No;No;No;No;No;Yes;Yes;No;No	Symptomatic	Personal vehicle	Private	Never	No	Occasionally	Occ	Vegetarian	V
248	0.08	0	Negative	Male	Staff	55	Govt. Service	S	O+	O	Positive	No	No	No	No	No	No	No	No		No	No	No	No	No	No	No	No	No	No	0	No	0	No	0	No	0	No	No;No;No;No;No;No;No;No;No	Asymptomatic	Personal vehicle	Private	Never	No	Never	No	Occasionally non veg	NV
249	0.09	0	Negative	Male	Student	22	Student	S	B+	B	Positive	No	No	No	No	No	No	No	No		No	No	No	No	No	No	No	No	No	No	1	No	1	No	1	No	0	No	No;No;No;No;No;No;No;No;No	Asymptomatic	Personal vehicle	Private	Never	No	Occasionally	Occ	Occasionally non veg	NV
250	0.07	0	Negative	Male	Staff	50	STAFF AT CBRI	S	B+	B	Positive	No	No	No	No	No	No	No	No		No	No	No	No	No	No	No	No	No	No	1	No	0	No	0	No	0	No	No;No;No;No;No;No;No;No;No	Asymptomatic	Personal vehicle	Private	Never	No	Never	No	Non vegetarian	NV
251	0.08	0	Negative	Male	Contractual Staff	29	WORKING AT CBRI ROORKEE	S	B+	B	Positive	No	No	No	No	No	No	No	No		No	No	No	No	No	No	No	No	No	No	1	No	0	No	0	No	0	No	No;No;No;No;No;No;No;No;No	Asymptomatic	Personal vehicle	Private	Never	No	Occasionally	Occ	Non vegetarian	NV
252	0.09	0	Negative	Female	Others	44	House wife	S	O+	O	Positive	No	No	Yes	Yes	No	No	No	No		No	No	No	No	No	No	No	No	No	No	2	No	0	No	0	No	0	No	No;No;No;No;No;No;No;No;No	Asymptomatic	No	Private	Never	No	Never	No	Vegetarian	V
253	0.09	0	Negative	Male	Others	43	Businessman	S	AB+	AB	Positive	Yes	Yes	No	No	No	No	No	No		No	No	No	No	No	No	No	No	No	No	0	No	0	No	0	No	0	No	No;No;No;No;No;No;No;No;No	Asymptomatic	Personal vehicle	Private	Never	No	Occasionally	Occ	Occasionally non veg	NV
254	0.09	0	Negative	Male	Faculty	58	Service	S	O+	O	Positive	No	No	No	No	No	No	No	No		No	No	No	No	Yes	Yes	No	No	No	No	1	No	1	No	0	No	0	No	No;No;Yes;No;No;No;No;No;No	Symptomatic	Personal vehicle	Private	Never	No	Never	No	Vegetarian	V
255	0.09	0	Negative	Female	Others	47	Housewife	S	B+	B	Positive	No	No	No	No	No	No	No	No		No	No	No	No	No	No	No	No	No	No	2	No	2	No	1	No	0	No	No;No;No;No;No;No;No;No;No	Asymptomatic	Personal vehicle	Private	Never	No	Never	No	Vegetarian	V
256	0.09	0	Negative	Male	Staff	59	Service	S	AB+	AB	Positive	No	No	No	No	Yes	Yes	No	No		No	No	No	No	No	No	No	No	No	No	0	No	1	No	0	No	0	No	No;No;No;No;No;No;No;No;No	Asymptomatic	Personal vehicle	Private	Never	No	Never	No	Vegetarian	V
257	0.09	0	Negative	Male	Staff	32	Sr. Scientist	S	O+	O	Positive	No	No	Yes	Yes	No	No	No	No		No	No	No	No	No	No	No	No	No	No	0	No	0	No	0	No	0	No	No;No;No;No;No;No;No;No;No	Asymptomatic	Personal vehicle	Private	Never	No	Never	No	Non vegetarian	NV
258	0.11	0	Negative	Female	Others	31	Housewife	S	O+	O	Positive	No	No	No	No	No	No	No	No		No	No	No	No	No	No	No	No	No	No	0	No	0	No	0	No	0	No	No;No;No;No;No;No;No;No;No	Asymptomatic	Personal vehicle	Private	Never	No	Never	No	Non vegetarian	NV
259	0.09	0	Negative	Male	Staff	38	Govt Job	S	B-	B	Negative	No	No	No	No	No	No	No	No		No	No	No	No	No	No	No	No	No	No	0	No	0	No	0	No	0	No	No;No;No;No;No;No;No;No;No	Asymptomatic	Personal vehicle	Private	Never	No	Occasionally	Occ	Vegetarian	V
260	0.08	0	Negative	Female	Others	34	NA	S	O-	O	Negative	No	No	No	No	No	No	No	No		No	No	No	No	No	No	No	No	No	No	0	No	2	No	2	No	1	No	No;No;No;No;No;No;No;No;No	Asymptomatic	Personal vehicle	Private	Never	No	Never	No	Vegetarian	V
261	0.1	0	Negative	Male	Others	64	Retired	S	B+	B	Positive	Yes	Yes	No	No	No	No	No	No		No	No	No	No	No	No	No	No	No	No	0	No	0	No	0	No	0	No	No;No;No;No;No;No;No;No;No	Asymptomatic	Personal vehicle	Private	Never	No	Never	No	Vegetarian	V
262	0.1	0	Negative	Female	Student	26	Ph.D. Scholar	S	B+	B	Positive	No	No	No	No	No	No	No	No		No	No	No	No	No	No	No	No	No	No	1	No	1	No	1	No	0	No	No;No;No;No;No;No;No;No;No	Asymptomatic	Personal vehicle	Private	Never	No	Never	No	Vegetarian	V
263	0.1	0	Negative	Male	Staff	32	Researcher	S	O+	O	Positive	No	No	No	No	No	No	No	No		No	No	No	No	No	No	No	No	No	No	0	No	0	No	0	No	0	No	No;No;No;No;No;No;No;No;No	Asymptomatic	Personal vehicle	Private	Never	No	Never	No	Non vegetarian	NV
264	0.08	0	Negative	Female	Contractual Staff	36	Research Associate	S	B+	B	Positive	No	No	No	No	No	No	No	No		No	No	No	No	No	No	No	No	No	No	0	No	1	No	0	No	0	No	No;No;No;No;No;No;No;No;No	Asymptomatic	Personal vehicle	Private	Never	No	Never	No	Vegetarian	V
265	11.65	1	Positive	Male	Staff	56	MTS AT CBRI ROORKEE	S		SU	SU	No	No	No	No	No	No	No	No		No	No	No	No	No	No	No	No	No	No	1	No	0	No	0	No	0	No	No;No;No;No;No;No;No;No;No	Asymptomatic	Personal vehicle	Private	Regular	Yes	Never	No	Vegetarian	V
266	0.1	0	Negative	Male	Staff	53	BEARER-ACP-II AT CBRI ROORKEE	S		SU	SU	No	No	No	No	No	No	No	No		No	No	No	No	No	No	No	No	No	No	1	No	4	Yes	0	No	0	No	No;No;No;No;No;No;Yes;No;No	Symptomatic	Personal vehicle	Private	Never	No	Never	No	Vegetarian	V
267	0.08	0	Negative	Male	Staff	34	Sr. Scientist AT CBRI	S	AB+	AB	Positive	No	No	No	No	No	No	No	No		No	No	No	No	No	No	No	No	No	No	0	No	0	No	0	No	0	No	No;No;No;No;No;No;No;No;No	Asymptomatic	Personal vehicle	Private	Never	No	Never	No	Non vegetarian	NV
268	0.09	0	Negative	Male	Staff	60	STAFF AT CBRI	S	O+	O	Positive	Yes	Yes	No	No	No	No	No	No		No	No	No	No	No	No	No	No	No	No	3	Yes	1	No	0	No	0	No	No;No;No;No;No;Yes;No;No;No	Symptomatic	Personal vehicle	Private	Never	No	Never	No	Vegetarian	V
269	0.08	0	Negative	Male	Contractual Staff	35	CONTRACTUAL STAFF AT CBRI	OS	O+	O	Positive	No	No	No	No	No	No	No	No		No	No	No	No	No	No	No	No	No	No	0	No	0	No	2	No	0	No	No;No;No;No;No;No;No;No;No	Asymptomatic	Personal vehicle	Private	Never	No	Occasionally	Occ	Non vegetarian	NV
270	0.1	0	Negative	Female	Others	34	HOUSE WIFE	S	O+	O	Positive	No	No	No	No	No	No	No	No		No	No	No	No	No	No	No	No	No	No	0	No	0	No	3	Yes	0	No	No;No;No;No;No;No;No;Yes;No	Symptomatic	Personal vehicle	Private	Never	No	Never	No	Vegetarian	V
271	0.09	0	Negative	Male	Staff	56	Govt. Service	S	B+	B	Positive	No	No	No	No	No	No	No	No		No	No	No	No	No	No	No	No	No	No	0	No	0	No	0	No	0	No	No;No;No;No;No;No;No;No;No	Asymptomatic	Personal vehicle	Private	Regular	Yes	Occasionally	Occ	Occasionally non veg	NV
272	0.08	0	Negative	Male	Staff	58	Sr. Technician at CBRI	S	AB+	AB	Positive	No	No	Yes	Yes	No	No	No	No		No	No	No	No	No	No	No	No	No	No	3	Yes	2	No	0	No	0	No	No;No;No;No;No;Yes;No;No;No	Symptomatic	Personal vehicle	Private	Regular	Yes	Occasionally	Occ	Non vegetarian	NV
273	0.1	0	Negative	Female	Others	53	HOUSE WIFE	S		SU	SU	No	No	No	No	No	No	No	No		No	No	No	No	No	No	No	No	No	No	3	Yes	3	Yes	0	No	0	No	No;No;No;No;No;Yes;Yes;No;No	Symptomatic	Personal vehicle	Private	Never	No	Never	No	Vegetarian	V
274	0.1	0	Negative	Male	Staff	53	Service	S	O+	O	Positive	No	No	No	No	No	No	No	No		No	No	No	No	No	No	No	No	No	No	1	No	1	No	0	No	0	No	No;No;No;No;No;No;No;No;No	Asymptomatic	Personal vehicle	Private	Never	No	Never	No	Occasionally non veg	NV
275	0.11	0	Negative	Male	Staff	57	CSIR employees	S	B+	B	Positive	No	No	Yes	Yes	No	No	No	No		No	No	No	No	No	No	No	No	No	No	0	No	0	No	0	No	0	No	No;No;No;No;No;No;No;No;No	Asymptomatic	Personal vehicle	Private	Never	No	Never	No	Non vegetarian	NV
276	0.1	0	Negative	Male	Student	28	PhD Scholar	S	B+	B	Positive	No	No	No	No	No	No	No	No		No	No	No	No	No	No	No	No	No	No	0	No	1	No	1	No	0	No	No;No;No;No;No;No;No;No;No	Asymptomatic	Personal vehicle	Private	Never	No	Never	No	Vegetarian	V
277	0.08	0	Negative	Male	Contractual Staff	24	Labore	OS	B+	B	Positive	No	No	No	No	No	No	No	No		No	No	No	No	No	No	No	No	No	No	0	No	0	No	0	No	0	No	No;No;No;No;No;No;No;No;No	Asymptomatic	Personal vehicle	Private	Never	No	Never	No	Occasionally non veg	NV
278	0.09	0	Negative	Male	Others	24	Labor	OS	B+	B	Positive	No	No	No	No	No	No	No	No		No	No	No	No	No	No	No	No	No	No	0	No	0	No	0	No	0	No	No;No;No;No;No;No;No;No;No	Asymptomatic	Personal vehicle	Private	Never	No	Never	No	Occasionally non veg	NV
279	0.09	0	Negative	Male	Staff	58	Scientist	S	O+	O	Positive	No	No	Yes	Yes	No	No	Yes	Yes	Negative	No	No	No	No	No	No	No	No	No	No	1	No	0	No	0	No	0	No	No;No;No;No;No;No;No;No;No	Asymptomatic	Personal vehicle	Private	Sporadic	Yes	Occasionally	Occ	Non vegetarian	NV
280	0.09	0	Negative	Female	Others	55	Scientist	S	B+	B	Positive	No	No	No	No	No	No	Yes	Yes	Negative	No	No	No	No	No	No	No	No	No	No	0	No	0	No	0	No	0	No	No;No;No;No;No;No;No;No;No	Asymptomatic	Personal vehicle	Private	Never	No	Occasionally	Occ	Non vegetarian	NV
281	0.09	0	Negative	Female	Others	25	Student	S	B+	B	Positive	No	No	No	No	No	No	Yes	Yes	Negative	Yes	Yes	No	No	No	No	No	No	No	No	0	No	0	No	0	No	0	No	Yes;No;No;No;No;No;No;No;No	Symptomatic	Personal vehicle	Private	Never	No	Occasionally	Occ	Non vegetarian	NV
282	0.09	0	Negative	Male	Others	20	Student	S	B+	B	Positive	No	No	No	No	No	No	Yes	Yes	Negative	Yes	Yes	No	No	No	No	No	No	No	No	0	No	0	No	1	No	0	No	Yes;No;No;No;No;No;No;No;No	Symptomatic	Personal vehicle	Private	Never	No	Never	No	Non vegetarian	NV
283	0.1	0	Negative	Male	Staff	36	Scientist	S	O+	O	Positive	No	No	No	No	No	No	No	No		No	No	No	No	No	No	No	No	No	No	0	No	0	No	0	No	0	No	No;No;No;No;No;No;No;No;No	Asymptomatic	Personal vehicle	Private	Never	No	Never	No	Occasionally non veg	NV
284	0.08	0	Negative	Female	Others	34	Home maker	S	B+	B	Positive	No	No	No	No	No	No	No	No		No	No	No	No	No	No	No	No	No	No	2	No	1	No	0	No	0	No	No;No;No;No;No;No;No;No;No	Asymptomatic	Personal vehicle	Private	Never	No	Never	No	Occasionally non veg	NV
285	0.09	0	Negative	Male	Staff	35	Sr. Scientist	S	AB+	AB	Positive	No	No	No	No	No	No	No	No		No	No	No	No	No	No	No	No	No	No	0	No	0	No	0	No	0	No	No;No;No;No;No;No;No;No;No	Asymptomatic	Personal vehicle	Private	Never	No	Never	No	Vegetarian	V
286	0.09	0	Negative	Female	Others	34	DOCTOR	S	B+	B	Positive	No	No	No	No	No	No	Yes	Yes	Negative	No	No	No	No	No	No	No	No	No	No	0	No	0	No	0	No	0	No	No;No;No;No;No;No;No;No;No	Asymptomatic	Personal vehicle	Private	Never	No	Never	No	Vegetarian	V
287	0.08	0	Negative	Male	Staff	49	Govt. Job	S	O+	O	Positive	No	No	No	No	No	No	No	No		No	No	No	No	No	No	No	No	No	No	0	No	0	No	0	No	0	No	No;No;No;No;No;No;No;No;No	Asymptomatic	Personal vehicle	Private	Never	No	Occasionally	Occ	Occasionally non veg	NV
288	0.08	0	Negative	Female	Staff	45	House wife	S		SU	SU	No	No	No	No	No	No	No	No		No	No	No	No	No	No		SU		SU	0	No	0	No	0	No	0	No	No;No;No;SU;SU;No;No;No;No	Asymptomatic	Personal vehicle	Private	Never	No	Never	No	Occasionally non veg	NV
289	0.08	0	Negative	Male	Staff	33	Scientist	S	O+	O	Positive	No	No	No	No	No	No	No	No		No	No	No	No	No	No	No	No	No	No	1	No	1	No	1	No	1	No	No;No;No;No;No;No;No;No;No	Asymptomatic	Personal vehicle	Private	Never	No	Never	No	Non vegetarian	NV
290	0.09	0	Negative	Female	Others	31	Homemaker	S	O+	O	Positive	No	No	No	No	No	No	No	No		No	No	No	No	No	No	No	No	No	No	0	No	0	No	0	No	0	No	No;No;No;No;No;No;No;No;No	Asymptomatic	Personal vehicle	Private	Never	No	Never	No	Vegetarian	V
291	0.15	0	Negative	Male	Contractual Staff	30	PROJECT ASSISTANT	S	O+	O	Positive	No	No	No	No	No	No	No	No		No	No	No	No	No	No	No	No	No	No	0	No	0	No	0	No	0	No	No;No;No;No;No;No;No;No;No	Asymptomatic	Personal vehicle	Private	Never	No	Never	No	Non vegetarian	NV
292	0.09	0	Negative	Male	Staff	55	Service	S		SU	SU	Yes	Yes	Yes	Yes	No	No	No	No		No	No	No	No	No	No	No	No	No	No	2	No	0	No	1	No	0	No	No;No;No;No;No;No;No;No;No	Asymptomatic	Personal vehicle	Private	Never	No	Never	No	Vegetarian	V
293	0.1	0	Negative	Male	Staff	55	Govt job	S	B+	B	Positive	No	No	No	No	No	No	No	No		No	No	No	No	No	No	No	No	No	No	1	No	0	No	0	No	0	No	No;No;No;No;No;No;No;No;No	Asymptomatic	Personal vehicle	Private	Never	No	Never	No	Vegetarian	V
294	0.08	0	Negative	Female	Staff	26	Project Assistant	S	A+	A	Positive	No	No	No	No	No	No	No	No		No	No	No	No	No	No	No	No	No	No	0	No	0	No	0	No	0	No	No;No;No;No;No;No;No;No;No	Asymptomatic	Personal vehicle	Private	Never	No	Never	No	Non vegetarian	NV
295	0.08	0	Negative	Female	Contractual Staff	22	Project Assistant	S	O+	O	Positive	No	No	No	No	No	No	No	No		No	No	No	No	No	No	No	No	No	No	0	No	0	No	0	No	0	No	No;No;No;No;No;No;No;No;No	Asymptomatic	Personal vehicle	Private	Never	No	Never	No	Vegetarian	V
296	0.09	0	Negative	Male	Contractual Staff	46	Temp staff	S		SU	SU	No	No	No	No	No	No	No	No		No	No	No	No	No	No	No	No	No	No	0	No	0	No	0	No	0	No	No;No;No;No;No;No;No;No;No	Asymptomatic	Personal vehicle	Private	Never	No	Never	No	Occasionally non veg	NV
297	0.16	0	Negative	Male	Staff	28	Scientist	S	B-	B	Negative	No	No	No	No	No	No	No	No		No	No	No	No	No	No	No	No	No	No	0	No	0	No	0	No	0	No	No;No;No;No;No;No;No;No;No	Asymptomatic	Personal vehicle	Private	Never	No	Never	No	Vegetarian	V
298	0.1	0	Negative	Male	Contractual Staff	24	Contractual Staff at CBRI Roorkee	OS		SU	SU	No	No	No	No	No	No	No	No		No	No	No	No	No	No	No	No	No	No	0	No	0	No	0	No	0	No	No;No;No;No;No;No;No;No;No	Asymptomatic	Personal vehicle	Private	Never	No	Never	No	Non vegetarian	NV
299	3.45	1	Positive	Male	Contractual Staff	25	Contractual Staff at CBRI	OS	A+	A	Positive	No	No	No	No	No	No	No	No		No	No	No	No	No	No	No	No	No	No	0	No	0	No	0	No	0	No	No;No;No;No;No;No;No;No;No	Asymptomatic	Personal vehicle	Private	Never	No	Never	No	Vegetarian	V
300	0.09	0	Negative	Male	Contractual Staff	51	Contractual Staff at CBRI	OS	O+	O	Positive	Yes	Yes	Yes	Yes	No	No	No	No		No	No	No	No	No	No	No	No	No	No	0	No	0	No	0	No	0	No	No;No;No;No;No;No;No;No;No	Asymptomatic	Personal vehicle	Private	Never	No	Occasionally	Occ	Non vegetarian	NV
301	0.09	0	Negative	Male	Contractual Staff	27	Contractual Staff at CBRI	OS		SU	SU	No	No	No	No	No	No	No	No		No	No	No	No	No	No	No	No	No	No	0	No	0	No	0	No	0	No	No;No;No;No;No;No;No;No;No	Asymptomatic	Personal vehicle	Private	Never	No	Never	No	Vegetarian	V
302	0.1	0	Negative	Male	Staff	56	Service	S		SU	SU	No	No	No	No	No	No	No	No		No	No	No	No	No	No	No	No	No	No	0	No	0	No	0	No	0	No	No;No;No;No;No;No;No;No;No	Asymptomatic	Personal vehicle	Private	Never	No	Never	No	Occasionally non veg	NV
303	0.09	0	Negative	Male	Contractual Staff	32	Contractual Staff at CBRI	OS		SU	SU	No	No	No	No	No	No	No	No		No	No	No	No	No	No	No	No	No	No	2	No	0	No	0	No	0	No	No;No;No;No;No;No;No;No;No	Asymptomatic	Personal vehicle	Private	Never	No	Never	No	Non vegetarian	NV
304	0.09	0	Negative	Male	Contractual Staff	31	Cont staff	OS		SU	SU	No	No	No	No	No	No	No	No		No	No	No	No	No	No	No	No	No	No	0	No	1	No	0	No	0	No	No;No;No;No;No;No;No;No;No	Asymptomatic	Personal vehicle	Private	Never	No	Never	No	Vegetarian	V
305	22.97	1	Positive	Male	Staff	58	Service	S		SU	SU	No	No	No	No	No	No	No	No		No	No	No	No	No	No	No	No	No	No	0	No	0	No	0	No	0	No	No;No;No;No;No;No;No;No;No	Asymptomatic	Personal vehicle	Private	Never	No	Never	No	Vegetarian	V
306	0.09	0	Negative	Male	Staff	24	MTS at director office CBRI	OS		SU	SU	No	No	No	No	No	No	No	No		No	No	No	No	No	No	No	No	No	No	0	No	0	No	0	No	0	No	No;No;No;No;No;No;No;No;No	Asymptomatic	Personal vehicle	Private	Never	No	Never	No	Non vegetarian	NV
307	0.09	0	Negative	Male	Staff	58	Bearer ACP II Director office CBRI	S	B+	B	Positive	No	No	No	No	No	No	No	No		No	No	No	No	No	No	No	No	No	No	0	No	0	No	0	No	0	No	No;No;No;No;No;No;No;No;No	Asymptomatic	Personal vehicle	Private	Never	No	Never	No	Non vegetarian	NV
308	0.09	0	Negative	Male	Others	26	Works at Iit roorkee	S		SU	SU	No	No	No	No	No	No	No	No		No	No	No	No	No	No	No	No	No	No	0	No	0	No	0	No	0	No	No;No;No;No;No;No;No;No;No	Asymptomatic	Personal vehicle	Private	Never	No	Never	No	Non vegetarian	NV
309	0.051	0	Negative	Female	Faculty	62		S	A+	A	Positive	No	No	No	No	Yes	Yes	No	No		No	No	No	No	No	No	No	No	No	No	2	No	1	No	0	No	0	No	No;No;No;No;No;No;No;No;No	Asymptomatic	Personal vehicle	Private	Never	No	Never	No	Non vegetarian	NV
310	0.056	0	Negative	Male	Staff	42		S	A+	A	Positive	No	No	No	No	No	No	No	No		No	No	No	No	No	No	No	No	No	No	0	No	0	No	0	No	0	No	No;No;No;No;No;No;No;No;No	Asymptomatic	Personal vehicle	Private	Never	No	Never	No	Occasionally non veg	NV
311	0.062	0	Negative	Male	Others	67		SU	O+	O	Positive	No	No	Yes	Yes	No	No	No	No		No	No	No	No	No	No	No	No	No	No	0	No	0	No	0	No	0	No	No;No;No;No;No;No;No;No;No	Asymptomatic	Personal vehicle	Private	Never	No	Occasionally	Occ	Occasionally non veg	NV
312	0.059	0	Negative	Female	Faculty	55		S	A+	A	Positive	No	No	No	No	No	No	Yes	Yes	Negative	No	No	No	No	Yes	Yes	No	No	No	No	0	No	0	No	0	No	0	No	No;No;Yes;No;No;No;No;No;No	Symptomatic	Personal vehicle	Private	Never	No	Often	Yes	Non vegetarian	NV
313	15.43	1	Positive	Male	Student	25		S	O-	O	Negative	No	No	No	No	No	No	Yes	Yes	Positive	Yes	Yes	No	No	Yes	Yes	Yes	Yes	No	No	1	No	1	No	0	No	0	No	Yes;No;Yes;Yes;No;No;No;No;No	Symptomatic	Public transport	Public	Never	No	Never	No	Non vegetarian	NV
314	0.056	0	Negative	Male	Faculty	52		S	B+	B	Positive	No	No	No	No	No	No	Yes	Yes	Negative	No	No	No	No	No	No	No	No	No	No	1	No	2	No	0	No	0	No	No;No;No;No;No;No;No;No;No	Asymptomatic	Personal vehicle	Private	Regular	Yes	Often	Yes	Non vegetarian	NV
315	0.052	0	Negative	Male	Staff	57		S	O+	O	Positive	Yes	Yes	Yes	Yes	No	No	No	No		Yes	Yes	No	No	Yes	Yes	No	No	No	No	2	No	0	No	0	No	0	No	Yes;No;Yes;No;No;No;No;No;No	Symptomatic	Personal vehicle	Private	Never	No	Never	No	Vegetarian	V
316	0.058	0	Negative	Female	Faculty	42		S	O+	O	Positive	No	No	Yes	Yes	No	No	Yes	Yes	Negative	No	No	No	No	No	No	No	No	No	No	2	No	1	No	2	No	0	No	No;No;No;No;No;No;No;No;No	Asymptomatic	Personal vehicle	Private	Never	No	Never	No	Vegetarian	V
317	0.053	0	Negative	Male		54	A	SU	A+	A	Positive	No	No	No	No	No	No	No	No		No	No	No	No	No	No	No	No	No	No	2	No	1	No	0	No	0	No	No;No;No;No;No;No;No;No;No	Asymptomatic	Personal vehicle	Private	Sporadic	Yes	Occasionally	Occ	Vegetarian	V
318	0.056	0	Negative	Male	Staff	56		S	O+	O	Positive	No	No	Yes	Yes	No	No	No	No		No	No	No	No	No	No	No	No	No	No	0	No	0	No	0	No	0	No	No;No;No;No;No;No;No;No;No	Asymptomatic	Personal vehicle	Private	Never	No	Occasionally	Occ	Occasionally non veg	NV
319	0.055	0	Negative	Female	Contractual Staff	23		OS	B+	B	Positive	No	No	No	No	No	No	No	No		No	No	No	No	No	No	No	No	No	No	0	No	0	No	0	No	0	No	No;No;No;No;No;No;No;No;No	Asymptomatic	Auto	Public	Never	No	Never	No	Non vegetarian	NV
320	0.098	0	Negative	Female	Student	26		S	A+	A	Positive	No	No	No	No	No	No	Yes	Yes	Negative	No	No	No	No	No	No	No	No	No	No	1	No	1	No	1	No	1	No	No;No;No;No;No;No;No;No;No	Asymptomatic	Personal vehicle	Private	Never	No	Never	No	Non vegetarian	NV
321	0.059	0	Negative	Male	Staff	33		S	B+	B	Positive	No	No	No	No	No	No	Yes	Yes	Negative	No	No	No	No	No	No	No	No	No	No	0	No	0	No	0	No	0	No	No;No;No;No;No;No;No;No;No	Asymptomatic	Personal vehicle	Private	Never	No	Occasionally	Occ	Occasionally non veg	NV
322	0.057	0	Negative	Male	Student	30		S	O+	O	Positive	No	No	No	No	No	No	No	No		No	No	No	No	Yes	Yes	No	No	No	No	3	Yes	3	Yes	1	No	1	No	No;No;Yes;No;No;Yes;Yes;No;No	Symptomatic	Personal vehicle	Private	Never	No	Never	No	Non vegetarian	NV
323	0.06	0	Negative	Male	Contractual Staff	35		OS	A+	A	Positive	No	No	No	No	No	No	No	No		No	No	No	No	No	No	No	No	No	No	1	No	1	No	1	No	0	No	No;No;No;No;No;No;No;No;No	Asymptomatic	Personal vehicle	Private	Never	No	Never	No	Vegetarian	V
324	0.06	0	Negative	Male	Staff	44		S	AB+	AB	Positive	No	No	Yes	Yes	No	No	Yes	Yes	Negative	No	No	No	No	No	No	No	No	No	No	1	No	0	No	0	No	0	No	No;No;No;No;No;No;No;No;No	Asymptomatic	Personal vehicle	Private	Never	No	Never	No	Occasionally non veg	NV
325	0.059	0	Negative	Male	Staff	54		S	AB+	AB	Positive	Yes	Yes	No	No	No	No	No	No		No	No	No	No	No	No	No	No	No	No	2	No	1	No	0	No	1	No	No;No;No;No;No;No;No;No;No	Asymptomatic	Personal vehicle	Private	Never	No	Occasionally	Occ	Non vegetarian	NV
326	2.78	1	Positive	Male	Staff	55		S		SU	SU	Yes	Yes	Yes	Yes	No	No	No	No		No	No	No	No	No	No	No	No	No	No	0	No	0	No	0	No	0	No	No;No;No;No;No;No;No;No;No	Asymptomatic	Personal vehicle	Private	Never	No	Never	No	Non vegetarian	NV
327	0.061	0	Negative	Male	Contractual Staff	50		OS		SU	SU	No	No	No	No	No	No	No	No		No	No	No	No	No	No	No	No	No	No	0	No	0	No	0	No	0	No	No;No;No;No;No;No;No;No;No	Asymptomatic	Personal vehicle	Private	Never	No	Never	No	Non vegetarian	NV
328	0.065	0	Negative	Female	Others	40		SU	B+	B	Positive	No	No	No	No	No	No	No	No		No	No	No	No	No	No	No	No	No	No	0	No	0	No	0	No	0	No	No;No;No;No;No;No;No;No;No	Asymptomatic	Personal vehicle	Private	Never	No	Occasionally	Occ	Non vegetarian	NV
329	0.06	0	Negative	Male	Faculty	52		S	A+	A	Positive	No	No	No	No	No	No	Yes	Yes	Negative	No	No	No	No	No	No	No	No	No	No	0	No	1	No	0	No	0	No	No;No;No;No;No;No;No;No;No	Asymptomatic	Personal vehicle	Private	Never	No	Occasionally	Occ	Non vegetarian	NV
330	0.061	0	Negative	Female	Staff	58		S	O+	O	Positive	No	No	Yes	Yes	No	No	No	No		No	No	No	No	No	No	No	No	No	No	2	No	2	No	1	No	1	No	No;No;No;No;No;No;No;No;No	Asymptomatic	Personal vehicle	Private	Never	No	Never	No	Vegetarian	V
331	0.059	0	Negative	Female	Staff	54		S	A+	A	Positive	No	No	Yes	Yes	No	No	Yes	Yes	Negative	No	No	No	No	No	No	No	No	No	No	3	Yes	2	No	1	No	0	No	No;No;No;No;No;Yes;No;No;No	Symptomatic	Personal vehicle	Private	Never	No	Never	No	Vegetarian	V
332	18.96	1	Positive	Male	Staff	58		S		SU	SU	Yes	Yes	Yes	Yes	No	No	Yes	Yes	Positive	No	No	No	No	No	No	No	No	No	No	0	No	0	No	0	No	0	No	No;No;No;No;No;No;No;No;No	Asymptomatic	Personal vehicle	Private	Never	No	Never	No	Vegetarian	V
333	0.059	0	Negative	Male	Faculty	30		S	O+	O	Positive	No	No	No	No	No	No	Yes	Yes	Negative	No	No	No	No	Yes	Yes	No	No	No	No	1	No	0	No	1	No	0	No	No;No;Yes;No;No;No;No;No;No	Symptomatic	Personal vehicle	Private	Never	No	Occasionally	Occ	Occasionally non veg	NV
334	0.061	0	Negative	Male	Staff	50		S		SU	SU	No	No	No	No	No	No	No	No		No	No	No	No	No	No	No	No	No	No	0	No	0	No	0	No	0	No	No;No;No;No;No;No;No;No;No	Asymptomatic	Personal vehicle	Private	Never	No	Never	No	Vegetarian	V
335	0.063	0	Negative	Male	Contractual Staff	35		OS		SU	SU	No	No	No	No	No	No	Yes	Yes	Negative	No	No	No	No	No	No	No	No	No	No	0	No	0	No	0	No	0	No	No;No;No;No;No;No;No;No;No	Asymptomatic	Personal vehicle	Private	Never	No	Never	No	Non vegetarian	NV
336	0.062	0	Negative	Female	Staff	48		S	O+	O	Positive	No	No	Yes	Yes	No	No	No	No		No	No	No	No	No	No	No	No	No	No	1	No	1	No	0	No	0	No	No;No;No;No;No;No;No;No;No	Asymptomatic	Auto	Public	Never	No	Never	No	Non vegetarian	NV
337	0.061	0	Negative	Male	Staff	37		S	A-	A	Negative	No	No	No	No	No	No	No	No		No	No	No	No	No	No	No	No	No	No	0	No	0	No	0	No	0	No	No;No;No;No;No;No;No;No;No	Asymptomatic	Personal vehicle	Private	Never	No	Never	No	Vegetarian	V
338	0.06	0	Negative	Male	Staff	56		S	A+	A	Positive	Yes	Yes	No	No	No	No	No	No		No	No	No	No	No	No	No	No	No	No	0	No	0	No	0	No	0	No	No;No;No;No;No;No;No;No;No	Asymptomatic	Auto	Public	Never	No	Never	No	Vegetarian	V
339	0.062	0	Negative	Male	Student	30		S	O+	O	Positive	No	No	No	No	No	No	Yes	Yes	Negative	No	No	No	No	No	No	No	No	No	No	1	No	0	No	1	No	0	No	No;No;No;No;No;No;No;No;No	Asymptomatic	I walk to main building in the campus form hostel	Private	Never	No	Occasionally	Occ	Vegetarian	V
340	84.33	1	Positive	Male	Staff	60		S	A+	A	Positive	No	No	No	No	No	No	No	No		No	No	Yes	Yes	Yes	Yes	No	No	No	No	3	Yes	3	Yes	0	No	0	No	No;Yes;Yes;No;No;Yes;Yes;No;No	Symptomatic	Personal vehicle	Private	Never	No	Occasionally	Occ	Non vegetarian	NV
341	4.95	1	Positive	Female	Others	52		SU	A+	A	Positive	No	No	No	No	No	No	No	No		Yes	Yes	Yes	Yes	No	No	No	No	No	No	3	Yes	3	Yes	2	No	0	No	Yes;Yes;No;No;No;Yes;Yes;No;No	Symptomatic	Personal vehicle	Private	Never	No	Never	No	Non vegetarian	NV
342	71.75	1	Positive	Male	Staff	44		S	A+	A	Positive	No	No	No	No	No	No	Yes	Yes	Positive	Yes	Yes	Yes	Yes	No	No	No	No	Yes	Yes	5	Yes	5	Yes	3	Yes	2	No	Yes;Yes;No;No;Yes;Yes;Yes;Yes;No	Symptomatic	Personal vehicle	Private	Never	No	Never	No	Non vegetarian	NV
343	75.68	1	Positive	Female	Staff	59		S	O+	O	Positive	No	No	No	No	No	No	No	No		No	No	No	No	No	No	No	No	No	No	1	No	1	No	0	No	0	No	No;No;No;No;No;No;No;No;No	Asymptomatic	Auto	Public	Never	No	Never	No	Vegetarian	V
344	0.065	0	Negative	Male	Student	30		S	O+	O	Positive	No	No	No	No	No	No	No	No		No	No	No	No	No	No	No	No		SU	0	No	0	No	0	No	0	No	No;No;No;No;SU;No;No;No;No	Asymptomatic	Personal vehicle	Private	Never	No	Never	No	Non vegetarian	NV
345	0.061	0	Negative	Male	Staff	40		S	B+	B	Positive	No	No	No	No	No	No	Yes	Yes	Negative	No	No	No	No	No	No	No	No	No	No	0	No	0	No	0	No	0	No	No;No;No;No;No;No;No;No;No	Asymptomatic	Personal vehicle	Private	Never	No	Never	No	Occasionally non veg	NV
346	0.062	0	Negative	Female	Staff	40		S	O+	O	Positive	No	No	No	No	No	No	Yes	Yes	Negative	No	No	No	No	No	No	No	No	No	No	1	No	0	No	1	No	0	No	No;No;No;No;No;No;No;No;No	Asymptomatic	Personal vehicle	Private	Never	No	Occasionally	Occ	Vegetarian	V
347	3.71	1	Positive	Female	Student	28		S	O+	O	Positive	No	No	No	No	No	No	Yes	Yes	Positive	No	No	No	No	No	No	Yes	Yes	May be	Yes	1	No	0	No	0	No	0	No	No;No;No;Yes;Yes;No;No;No;No	Symptomatic	Personal vehicle	Private	Never	No	Never	No	Vegetarian	V
348	0.072	0	Negative	Male	Staff	43		S	O+	O	Positive	No	No	No	No	No	No	Yes	Yes	Negative	No	No	No	No	No	No	No	No	No	No	1	No	1	No	0	No	0	No	No;No;No;No;No;No;No;No;No	Asymptomatic	Personal vehicle	Private	Never	No	Never	No	Occasionally non veg	NV
349	0.062	0	Negative	Male	Staff	53		S	O+	O	Positive	No	No	No	No	No	No	No	No		No	No	No	No	No	No	No	No	No	No	1	No	0	No	0	No	0	No	No;No;No;No;No;No;No;No;No	Asymptomatic	Personal vehicle	Private	Never	No	Occasionally	Occ	Non vegetarian	NV
350	0.075	0	Negative	Female	Student	25		S	A+	A	Positive	No	No	No	No	No	No	Yes	Yes	Negative	Yes	Yes	No	No	No	No	No	No	No	No	2	No	2	No	2	No	0	No	Yes;No;No;No;No;No;No;No;No	Symptomatic	Auto	Public	Never	No	Occasionally	Occ	Vegetarian	V
351	0.077	0	Negative	Male	Others	37		SU	O+	O	Positive	Yes	Yes	No	No	No	No	Yes	Yes	Positive	No	No	No	No	No	No	No	No	No	No	3	Yes	3	Yes	0	No	1	No	No;No;No;No;No;Yes;Yes;No;No	Symptomatic	Personal vehicle	Private	Never	No	Occasionally	Occ	Non vegetarian	NV
352	0.063	0	Negative	Male	Staff	55		S	O+	O	Positive	Yes	Yes	Yes	Yes	No	No	No	No		No	No	No	No	No	No	No	No	No	No	2	No	0	No	0	No	0	No	No;No;No;No;No;No;No;No;No	Asymptomatic	Personal vehicle	Private	Sporadic	Yes	Never	No	Non vegetarian	NV
353	0.068	0	Negative	Female	Student	31		S	O+	O	Positive	No	No	No	No	No	No	Yes	Yes	Negative	No	No	No	No	No	No	No	No	No	No	1	No	1	No	1	No	0	No	No;No;No;No;No;No;No;No;No	Asymptomatic	Personal vehicle	Private	Never	No	Occasionally	Occ	Vegetarian	V
354	0.085	0	Negative	Male	Faculty	55		S	O+	O	Positive	No	No	No	No	No	No	Yes	Yes	Negative	No	No	Yes	Yes	Yes	Yes	No	No	No	No	3	Yes	3	Yes	0	No	1	No	No;Yes;Yes;No;No;Yes;Yes;No;No	Symptomatic	Personal vehicle	Private	Never	No	Never	No	Vegetarian	V
355	13.17	1	Positive	Female	Others	23		SU	B+	B	Positive	No	No	No	No	No	No	No	No		No	No	No	No	No	No	May be	Yes	No	No	2	No	1	No	1	No	0	No	No;No;No;Yes;No;No;No;No;No	Symptomatic	Ccmb transport	Private	Never	No	Occasionally	Occ	Non vegetarian	NV
356	21.46	1	Positive	Female	Contractual Staff	24		OS	B+	B	Positive	No	No	No	No	No	No	Yes	Yes	Positive	No	No	Yes	Yes	No	No	Yes	Yes	No	No	0	No	0	No	0	No	1	No	No;Yes;No;Yes;No;No;No;No;No	Symptomatic	Public transport	Public	Never	No	Never	No	Non vegetarian	NV
357	15.97	1	Positive	Male	Staff	43		S	O+	O	Positive	No	No	No	No	No	No	No	No		No	No	No	No	No	No	No	No	No	No	0	No	0	No	0	No	0	No	No;No;No;No;No;No;No;No;No	Asymptomatic	Personal vehicle	Private	Never	No	Never	No	Non vegetarian	NV
358	102	1	Positive	Male	Staff	60		S		SU	SU	No	No	No	No	No	No	No	No		No	No	No	No	No	No	No	No	No	No	0	No	0	No	0	No	0	No	No;No;No;No;No;No;No;No;No	Asymptomatic	Personal vehicle	Private	Never	No	Never	No	Non vegetarian	NV
359	182.1	1	Positive	Male	Contractual Staff	38		OS		SU	SU	No	No	No	No	No	No	No	No		No	No	No	No	No	No	No	No	No	No	0	No	0	No	0	No	0	No	No;No;No;No;No;No;No;No;No	Asymptomatic	Personal vehicle	Private	Never	No	Never	No	Non vegetarian	NV
360	0.073	0	Negative	Female	Student	29		S	O+	O	Positive	No	No	No	No	No	No	Yes	Yes	Negative	Yes	Yes	Yes	Yes	Yes	Yes	No	No	No	No	1	No	0	No	0	No	1	No	Yes;Yes;Yes;No;No;No;No;No;No	Symptomatic	walking	Private	Never	No	Never	No	Occasionally non veg	NV
361	0.072	0	Negative	Female	Student	33		S	B+	B	Positive	No	No	No	No	No	No	No	No		No	No	No	No	No	No	No	No	No	No	1	No	1	No	1	No	0	No	No;No;No;No;No;No;No;No;No	Asymptomatic	Personal vehicle	Private	Never	No	Occasionally	Occ	Non vegetarian	NV
362	0.07	0	Negative	Male	Others	61		SU	O+	O	Positive	Yes	Yes	No	No	No	No	Yes	Yes	Negative	No	No	No	No	No	No	No	No	No	No	2	No	1	No	1	No	0	No	No;No;No;No;No;No;No;No;No	Asymptomatic	Personal vehicle	Private	Never	No	Never	No	Vegetarian	V
363	0.078	0	Negative	Male	Contractual Staff	48		OS		SU	SU	No	No	No	No	No	No	No	No		No	No	No	No	No	No	No	No	No	No	0	No	0	No	0	No	0	No	No;No;No;No;No;No;No;No;No	Asymptomatic	Personal vehicle	Private	Never	No	Never	No	Non vegetarian	NV
364	77.15	1	Positive	Male	Contractual Staff	44		OS		SU	SU	No	No	No	No	No	No	No	No		No	No	No	No	No	No	No	No	No	No	0	No	0	No	0	No	0	No	No;No;No;No;No;No;No;No;No	Asymptomatic	Personal vehicle	Private	Never	No	Never	No	Non vegetarian	NV
365	0.074	0	Negative	Female	Student	30		S	O+	O	Positive	No	No	No	No	No	No	Yes	Yes	Negative	No	No	No	No	No	No	No	No	No	No	1	No	1	No	1	No	0	No	No;No;No;No;No;No;No;No;No	Asymptomatic	Personal vehicle	Private	Never	No	Occasionally	Occ	Vegetarian	V
366	0.085	0	Negative	Male	Staff	33		S	B+	B	Positive	No	No	No	No	No	No	No	No		No	No	No	No	No	No	No	No	No	No	3	Yes	0	No	0	No	0	No	No;No;No;No;No;Yes;No;No;No	Symptomatic	Personal vehicle	Private	Never	No	Never	No	Vegetarian	V
367	0.076	0	Negative	Male	Contractual Staff	50		OS		SU	SU	No	No	No	No	No	No	No	No		No	No	No	No	No	No	No	No	No	No	0	No	0	No	0	No	0	No	No;No;No;No;No;No;No;No;No	Asymptomatic	Personal vehicle	Private	Never	No	Never	No	Non vegetarian	NV
368	0.077	0	Negative	Male	Contractual Staff	48		OS		SU	SU	No	No	No	No	No	No	No	No		No	No	No	No	No	No	No	No	No	No	0	No	0	No	0	No	0	No	No;No;No;No;No;No;No;No;No	Asymptomatic	Personal vehicle	Private	Never	No	Occasionally	Occ	Non vegetarian	NV
369	0.076	0	Negative	Male	Contractual Staff	39		OS	O+	O	Positive	No	No	No	No	No	No	No	No		No	No	No	No	No	No	No	No	No	No	0	No	0	No	0	No	0	No	No;No;No;No;No;No;No;No;No	Asymptomatic	Personal vehicle	Private	Never	No	Occasionally	Occ	Non vegetarian	NV
370	0.081	0	Negative	Male	Contractual Staff	28		OS		SU	SU	No	No	No	No	No	No	No	No		No	No	No	No	No	No	No	No	No	No	0	No	0	No	0	No	0	No	No;No;No;No;No;No;No;No;No	Asymptomatic	Personal vehicle	Private	Never	No	Never	No	Non vegetarian	NV
371	0.05	0	Negative	Female	Contractual Staff	41		OS	B+	B	Positive	No	No	No	No	No	No	No	No		No	No	No	No	No	No	No	No	No	No	0	No	0	No	0	No	0	No	No;No;No;No;No;No;No;No;No	Asymptomatic	Personal vehicle	Private	Never	No	Never	No	Non vegetarian	NV
372	2.66	1	Positive	Male	Contractual Staff	53		OS		SU	SU	No	No	No	No	No	No	No	No		No	No	No	No	No	No	No	No	No	No	0	No	0	No	0	No	0	No	No;No;No;No;No;No;No;No;No	Asymptomatic	Personal vehicle	Private	Never	No	Never	No	Non vegetarian	NV
373	17.26	1	Positive	Male	Contractual Staff	42		OS	A+	A	Positive	Yes	Yes	Yes	Yes	No	No	No	No		No	No	No	No	No	No	No	No	No	No	0	No	0	No	0	No	0	No	No;No;No;No;No;No;No;No;No	Asymptomatic	Personal vehicle	Private	Never	No	Occasionally	Occ	Non vegetarian	NV
374	68.34	1	Positive	Male	Contractual Staff	36		OS	B-	B	Negative	No	No	No	No	No	No	No	No		No	No	No	No	No	No	No	No	No	No	0	No	0	No	0	No	0	No	No;No;No;No;No;No;No;No;No	Asymptomatic	Personal vehicle	Private	Never	No	Occasionally	Occ	Non vegetarian	NV
375	3.31	1	Positive	Female	Contractual Staff	46		OS		SU	SU	No	No	Yes	Yes	No	No	No	No		No	No	No	No	No	No	No	No	No	No	0	No	0	No	0	No	0	No	No;No;No;No;No;No;No;No;No	Asymptomatic	Personal vehicle	Private	Never	No	Occasionally	Occ	Non vegetarian	NV
376	0.047	0	Negative	Male	Contractual Staff	34		OS		SU	SU	No	No	No	No	No	No	Yes	Yes	Negative	No	No	No	No	No	No	No	No	No	No	0	No	0	No	0	No	0	No	No;No;No;No;No;No;No;No;No	Asymptomatic	Personal vehicle	Private	Never	No	Occasionally	Occ	Non vegetarian	NV
377	0.051	0	Negative	Male	Contractual Staff	33		OS		SU	SU	No	No	No	No	No	No	No	No		No	No	No	No	No	No	No	No	No	No	0	No	0	No	0	No	0	No	No;No;No;No;No;No;No;No;No	Asymptomatic	Personal vehicle	Private	Never	No	Never	No	Occasionally non veg	NV
378	69.39	1	Positive	Male	Contractual Staff	41		OS	O+	O	Positive	No	No	No	No	No	No	Yes	Yes	Positive	No	No	No	No	No	No	No	No	No	No	0	No	0	No	0	No	0	No	No;No;No;No;No;No;No;No;No	Asymptomatic	Personal vehicle	Private	Never	No	Occasionally	Occ	Non vegetarian	NV
379	0.051	0	Negative	Male	Contractual Staff	38		OS		SU	SU	No	No	No	No	No	No	No	No		No	No	No	No	No	No	No	No	No	No	0	No	0	No	0	No	0	No	No;No;No;No;No;No;No;No;No	Asymptomatic	Personal vehicle	Private	Never	No	Occasionally	Occ	Occasionally non veg	NV
380	0.051	0	Negative	Female	Staff	51		S		SU	SU	No	No	No	No	No	No	No	No		No	No	No	No	No	No	No	No	No	No	0	No	0	No	0	No	0	No	No;No;No;No;No;No;No;No;No	Asymptomatic	Personal vehicle	Private	Never	No	Never	No	Non vegetarian	NV
381	10.59	1	Positive	Female	Staff	39		S	A-	A	Negative	No	No	No	No	No	No	Yes	Yes	Positive	No	No	No	No	No	No	No	No	No	No	2	No	2	No	2	No	0	No	No;No;No;No;No;No;No;No;No	Asymptomatic	Personal vehicle	Private	Never	No	Never	No	Occasionally non veg	NV
382	0.048	0	Negative	Female	Contractual Staff	50		OS	O+	O	Positive	No	No	No	No	No	No	No	No		No	No	No	No	No	No	No	No	No	No	1	No	1	No	0	No	0	No	No;No;No;No;No;No;No;No;No	Asymptomatic	Personal vehicle	Private	Never	No	Never	No	Non vegetarian	NV
383	10.63	1	Positive	Female	Contractual Staff	37		OS		SU	SU	No	No	No	No	No	No	Yes	Yes	Negative	No	No	No	No	No	No	No	No	No	No	0	No	0	No	0	No	0	No	No;No;No;No;No;No;No;No;No	Asymptomatic	Personal vehicle	Private	Never	No	Never	No	Non vegetarian	NV
384	50.16	1	Positive	Female	Contractual Staff	46		OS		SU	SU	No	No	No	No	No	No	Yes	Yes	Negative	No	No	No	No	No	No	No	No	No	No	1	No	0	No	0	No	0	No	No;No;No;No;No;No;No;No;No	Asymptomatic	Personal vehicle	Private	Never	No	Never	No	Non vegetarian	NV
385	9.24	1	Positive	Male	Contractual Staff	52		OS		SU	SU	No	No	No	No	No	No	Yes	Yes	Negative	No	No	No	No	No	No	No	No	No	No	0	No	0	No	0	No	0	No	No;No;No;No;No;No;No;No;No	Asymptomatic	Personal vehicle	Private	Sporadic	Yes	Occasionally	Occ	Non vegetarian	NV
386	0.05	0	Negative	Male	Contractual Staff	26		OS		SU	SU	No	No	No	No	No	No	Yes	Yes	Negative	No	No	No	No	No	No	No	No	No	No	0	No	1	No	0	No	0	No	No;No;No;No;No;No;No;No;No	Asymptomatic	Personal vehicle	Private	Never	No	Never	No	Non vegetarian	NV
387	73.45	1	Positive	Male	Contractual Staff	42		OS		SU	SU	No	No	Yes	Yes	No	No	Yes	Yes	Negative	No	No	No	No	No	No	No	No	No	No	0	No	0	No	0	No	0	No	No;No;No;No;No;No;No;No;No	Asymptomatic	Personal vehicle	Private	Never	No	Occasionally	Occ	Non vegetarian	NV
388	0.052	0	Negative	Male	Contractual Staff	38		OS		SU	SU	No	No	No	No	No	No	No	No		No	No	No	No	No	No	No	No	No	No	0	No	0	No	0	No	0	No	No;No;No;No;No;No;No;No;No	Asymptomatic	Personal vehicle	Private	Never	No	Never	No	Non vegetarian	NV
389	14.43	1	Positive	Male	Contractual Staff	35		OS		SU	SU	No	No	No	No	No	No	No	No		No	No	No	No	No	No	No	No	No	No	0	No	0	No	0	No	0	No	No;No;No;No;No;No;No;No;No	Asymptomatic	Personal vehicle	Private	Never	No	Occasionally	Occ	Non vegetarian	NV
390	0.05	0	Negative	Male	Contractual Staff	53		OS		SU	SU	No	No	Yes	Yes	No	No	No	No		No	No	No	No	No	No	No	No	No	No	0	No	0	No	0	No	0	No	No;No;No;No;No;No;No;No;No	Asymptomatic	Personal vehicle	Private	Never	No	Occasionally	Occ	Non vegetarian	NV
391	0.049	0	Negative	Male	Contractual Staff	49		OS		SU	SU	No	No	No	No	No	No	No	No		No	No	No	No	No	No	No	No	No	No	0	No	0	No	0	No	0	No	No;No;No;No;No;No;No;No;No	Asymptomatic	Personal vehicle	Private	Never	No	Never	No	Non vegetarian	NV
392	5.75	1	Positive	Male	Contractual Staff	43		OS	O+	O	Positive	Yes	Yes	No	No	No	No	No	No		No	No	No	No	No	No	No	No	No	No	1	No	0	No	1	No	0	No	No;No;No;No;No;No;No;No;No	Asymptomatic	Personal vehicle	Private	Sporadic	Yes	Never	No	Non vegetarian	NV
393	0.05	0	Negative	Male	Contractual Staff	48		OS		SU	SU	No	No	No	No	No	No	No	No		No	No	No	No	No	No	No	No	No	No	0	No	0	No	0	No	0	No	No;No;No;No;No;No;No;No;No	Asymptomatic	Personal vehicle	Private	Never	No	Never	No	Non vegetarian	NV
394	0.049	0	Negative	Male	Contractual Staff	47		OS		SU	SU	No	No	No	No	No	No	No	No		No	No	No	No	No	No	No	No	No	No	0	No	0	No	0	No	0	No	No;No;No;No;No;No;No;No;No	Asymptomatic	Personal vehicle	Private	Never	No	Occasionally	Occ	Non vegetarian	NV
395	0.051	0	Negative	Male	Contractual Staff	28		OS	AB+	AB	Positive	No	No	No	No	No	No	No	No		No	No	No	No	No	No	No	No	No	No	0	No	0	No	0	No	0	No	No;No;No;No;No;No;No;No;No	Asymptomatic	WALKING	Private	Never	No	Never	No	Non vegetarian	NV
396	0.048	0	Negative	Male	Contractual Staff	31		OS	O+	O	Positive	No	No	No	No	No	No	No	No		No	No	No	No	No	No	No	No	No	No	0	No	0	No	0	No	0	No	No;No;No;No;No;No;No;No;No	Asymptomatic	Personal vehicle	Private	Never	No	Never	No	Non vegetarian	NV
397	0.05	0	Negative	Male	Contractual Staff	59		OS	B+	B	Positive	No	No	No	No	No	No	No	No		No	No	No	No	No	No	No	No	No	No	0	No	0	No	0	No	0	No	No;No;No;No;No;No;No;No;No	Asymptomatic	Personal vehicle	Private	Never	No	Occasionally	Occ	Vegetarian	V
398	0.049	0	Negative	Male	Staff	35		S	B+	B	Positive	No	No	No	No	No	No	No	No		No	No	No	No	No	No	No	No	No	No	0	No	0	No	0	No	0	No	No;No;No;No;No;No;No;No;No	Asymptomatic	Personal vehicle	Private	Never	No	Never	No	Occasionally non veg	NV
399	26.63	1	Positive	Male	Contractual Staff	55		OS	O+	O	Positive	No	No	Yes	Yes	No	No	No	No		No	No	No	No	No	No	No	No	No	No	0	No	0	No	0	No	0	No	No;No;No;No;No;No;No;No;No	Asymptomatic	Personal vehicle	Private	Never	No	Never	No	Vegetarian	V
400	0.049	0	Negative	Male	Contractual Staff	33		OS	B+	B	Positive	No	No	No	No	No	No	No	No		No	No	No	No	No	No	No	No	No	No	0	No	0	No	0	No	0	No	No;No;No;No;No;No;No;No;No	Asymptomatic	Personal vehicle	Private	Never	No	Never	No	Occasionally non veg	NV
401	14.03	1	Positive	Male	Contractual Staff	59		OS		SU	SU	No	No	No	No	No	No	No	No		No	No	No	No	No	No	No	No	No	No	0	No	0	No	0	No	0	No	No;No;No;No;No;No;No;No;No	Asymptomatic	Personal vehicle	Private	Never	No	Never	No	Vegetarian	V
402	3.5	1	Positive	Male	Contractual Staff	47		OS		SU	SU	No	No	No	No	No	No	No	No		No	No	No	No	No	No	No	No	No	No	0	No	0	No	0	No	0	No	No;No;No;No;No;No;No;No;No	Asymptomatic	Personal vehicle	Private	Never	No	Occasionally	Occ	Vegetarian	V
403	0.055	0	Negative	Female	Contractual Staff	48		OS		SU	SU	No	No	No	No	No	No	No	No		No	No	No	No	No	No	No	No	No	No	0	No	0	No	0	No	0	No	No;No;No;No;No;No;No;No;No	Asymptomatic	Auto	Public	Never	No	Never	No	Non vegetarian	NV
404	0.057	0	Negative	Female	Contractual Staff	45		OS		SU	SU	No	No	No	No	No	No	No	No		No	No	No	No	No	No	No	No	No	No	0	No	0	No	0	No	0	No	No;No;No;No;No;No;No;No;No	Asymptomatic	Auto	Public	Never	No	Never	No	Non vegetarian	NV
405	11.28	1	Positive	Female	Contractual Staff	48		OS		SU	SU	No	No	No	No	No	No	No	No		No	No	No	No	No	No	No	No	No	No	0	No	0	No	0	No	0	No	No;No;No;No;No;No;No;No;No	Asymptomatic	Auto	Public	Never	No	Never	No	Occasionally non veg	NV
406	0.049	0	Negative	Female	Contractual Staff	38		OS		SU	SU	No	No	No	No	No	No	No	No		No	No	No	No	No	No	No	No	No	No	0	No	0	No	0	No	0	No	No;No;No;No;No;No;No;No;No	Asymptomatic	Personal vehicle	Private	Never	No	Never	No	Non vegetarian	NV
407	0.049	0	Negative	Female	Contractual Staff	37		OS		SU	SU	No	No	No	No	No	No	No	No		No	No	No	No	No	No	No	No	No	No	0	No	0	No	0	No	0	No	No;No;No;No;No;No;No;No;No	Asymptomatic	Personal vehicle	Private	Never	No	Never	No	Vegetarian	V
408	7.06	1	Positive	Male	Contractual Staff	41		OS	B+	B	Positive	Yes	Yes	Yes	Yes	No	No	No	No		No	No	No	No	No	No	No	No	No	No	0	No	0	No	0	No	0	No	No;No;No;No;No;No;No;No;No	Asymptomatic	Personal vehicle	Private	Never	No	Occasionally	Occ	Non vegetarian	NV
409	0.05	0	Negative	Male	Contractual Staff	48		OS		SU	SU	No	No	No	No	No	No	No	No		No	No	No	No	No	No	No	No	No	No	0	No	0	No	0	No	0	No	No;No;No;No;No;No;No;No;No	Asymptomatic	Personal vehicle	Private	Never	No	Never	No	Vegetarian	V
410	0.051	0	Negative	Female	Contractual Staff	46		OS	O+	O	Positive	No	No	No	No	No	No	No	No		No	No	No	No	No	No	No	No	No	No	0	No	0	No	0	No	0	No	No;No;No;No;No;No;No;No;No	Asymptomatic	Auto	Public	Never	No	Never	No	Non vegetarian	NV
411	0.05	0	Negative	Female	Contractual Staff	54		OS		SU	SU	Yes	Yes	No	No	No	No	No	No		No	No	No	No	No	No	No	No	No	No	3	Yes	2	No	0	No	1	No	No;No;No;No;No;Yes;No;No;No	Symptomatic	Auto	Public	Never	No	Never	No	Non vegetarian	NV
412	10.54	1	Positive	Female	Contractual Staff	36		OS		SU	SU	No	No	No	No	No	No	No	No		No	No	No	No	No	No	No	No	No	No	0	No	0	No	0	No	0	No	No;No;No;No;No;No;No;No;No	Asymptomatic	Personal vehicle	Private	Never	No	Never	No	Non vegetarian	NV
413	0.054	0	Negative	Female	Contractual Staff	33		OS		SU	SU	No	No	No	No	No	No	No	No		No	No	No	No	No	No	No	No	No	No	0	No	0	No	0	No	0	No	No;No;No;No;No;No;No;No;No	Asymptomatic	Personal vehicle	Private	Never	No	Never	No	Vegetarian	V
414	0.055	0	Negative	Female	Contractual Staff	40		OS		SU	SU	No	No	No	No	No	No	No	No		No	No	No	No	No	No	No	No	No	No	0	No	0	No	0	No	0	No	No;No;No;No;No;No;No;No;No	Asymptomatic	Personal vehicle	Private	Never	No	Never	No	Non vegetarian	NV
415	0.051	0	Negative	Female	Contractual Staff	45		OS		SU	SU	No	No	No	No	No	No	Yes	Yes	Negative	No	No	No	No	No	No	No	No	No	No	0	No	0	No	0	No	0	No	No;No;No;No;No;No;No;No;No	Asymptomatic	Personal vehicle	Private	Never	No	Never	No	Non vegetarian	NV
416	0.05	0	Negative	Male	Contractual Staff	30		OS		SU	SU	No	No	No	No	No	No	No	No		No	No	No	No	No	No	No	No	No	No	0	No	0	No	0	No	0	No	No;No;No;No;No;No;No;No;No	Asymptomatic	Personal vehicle	Private	Never	No	Occasionally	Occ	Non vegetarian	NV
417	0.054	0	Negative	Female	Staff	46		S	O+	O	Positive	No	No	No	No	No	No	No	No		No	No	No	No	No	No	No	No	No	No	2	No	1	No	1	No	0	No	No;No;No;No;No;No;No;No;No	Asymptomatic	Personal vehicle	Private	Never	No	Never	No	Occasionally non veg	NV
418	0.055	0	Negative	Female	Contractual Staff	31		OS		SU	SU	No	No	No	No	No	No	No	No		No	No	No	No	No	No	No	No	No	No	0	No	0	No	0	No	0	No	No;No;No;No;No;No;No;No;No	Asymptomatic	Personal vehicle	Private	Never	No	Never	No	Non vegetarian	NV
419	0.097	0	Negative	Male	Contractual Staff	37		OS	A+	A	Positive	No	No	No	No	No	No	No	No		No	No	No	No	No	No	No	No	No	No	0	No	0	No	0	No	0	No	No;No;No;No;No;No;No;No;No	Asymptomatic	Personal vehicle	Private	Never	No	Occasionally	Occ	Occasionally non veg	NV
420	0.053	0	Negative	Male	Contractual Staff	38		OS		SU	SU	No	No	No	No	No	No	No	No		No	No	No	No	No	No	No	No	No	No	0	No	0	No	0	No	0	No	No;No;No;No;No;No;No;No;No	Asymptomatic	Personal vehicle	Private	Never	No	Never	No	Non vegetarian	NV
421	55.9	1	Positive	Male	Contractual Staff	38		OS		SU	SU	No	No	No	No	No	No	No	No		No	No	No	No	No	No	No	No	No	No	0	No	1	No	0	No	0	No	No;No;No;No;No;No;No;No;No	Asymptomatic	Personal vehicle	Private	Never	No	Never	No	Non vegetarian	NV
422	1.15	1	Positive	Male	Contractual Staff	37		OS	B+	B	Positive	No	No	No	No	No	No	No	No		No	No	No	No	No	No	No	No	No	No	0	No	0	No	0	No	0	No	No;No;No;No;No;No;No;No;No	Asymptomatic	Personal vehicle	Private	Never	No	Never	No	Non vegetarian	NV
423	49.33	1	Positive	Female	Others	45		SU		SU	SU	No	No	No	No	No	No	No	No		No	No	No	No	No	No	No	No	No	No	0	No	0	No	0	No	0	No	No;No;No;No;No;No;No;No;No	Asymptomatic	Personal vehicle	Private	Never	No	Never	No	Vegetarian	V
424	0.048	0	Negative	Female	Contractual Staff	55		OS		SU	SU	No	No	No	No	No	No	No	No		No	No	No	No	No	No	No	No	No	No	0	No	0	No	0	No	0	No	No;No;No;No;No;No;No;No;No	Asymptomatic	Personal vehicle	Private	Never	No	Never	No	Non vegetarian	NV
425	68.77	1	Positive	Male	Contractual Staff	54		OS		SU	SU	No	No	No	No	No	No	No	No		No	No	No	No	No	No	No	No	No	No	0	No	0	No	0	No	0	No	No;No;No;No;No;No;No;No;No	Asymptomatic	Public transport	Public	Never	No	Never	No	Vegetarian	V
426	17.73	1	Positive	Male	Contractual Staff	51		OS		SU	SU	No	No	No	No	No	No	No	No		No	No	No	No	No	No	No	No	No	No	0	No	0	No	0	No	0	No	No;No;No;No;No;No;No;No;No	Asymptomatic	Personal vehicle	Private	Never	No	Never	No	Non vegetarian	NV
427	0.032	0	Negative	Male	Contractual Staff	53		OS		SU	SU	No	No	No	No	No	No	No	No		No	No	No	No	No	No	No	No	No	No	0	No	0	No	0	No	0	No	No;No;No;No;No;No;No;No;No	Asymptomatic	Personal vehicle	Private	Never	No	Never	No	Non vegetarian	NV
428	0.036	0	Negative	Female	Contractual Staff	34		OS		SU	SU	No	No	No	No	No	No	No	No		No	No	No	No	No	No	No	No	No	No	0	No	0	No	0	No	0	No	No;No;No;No;No;No;No;No;No	Asymptomatic	Personal vehicle	Private	Never	No	Never	No	Non vegetarian	NV
429	32.9	1	Positive	Male	Contractual Staff	42		OS		SU	SU	No	No	No	No	No	No	No	No		No	No	No	No	No	No	No	No	No	No	0	No	0	No	0	No	0	No	No;No;No;No;No;No;No;No;No	Asymptomatic	Personal vehicle	Private	Never	No	Never	No	Non vegetarian	NV
430	23.51	1	Positive	Male	Contractual Staff	36		OS	O+	O	Positive	No	No	No	No	No	No	Yes	Yes	Negative	Yes	Yes	No	No	No	No	Yes	Yes	Yes	Yes	0	No	0	No	0	No	0	No	Yes;No;No;Yes;Yes;No;No;No;No	Symptomatic	Personal vehicle	Private	Never	No	Occasionally	Occ	Non vegetarian	NV
431	0.035	0	Negative	Male	Contractual Staff	45		OS		SU	SU	No	No	No	No	No	No	No	No		No	No	No	No	No	No	No	No	No	No	0	No	0	No	0	No	0	No	No;No;No;No;No;No;No;No;No	Asymptomatic	Personal vehicle	Private	Never	No	Never	No	Non vegetarian	NV
432	0.035	0	Negative	Male	Contractual Staff	38		OS	O+	O	Positive	No	No	No	No	No	No	No	No		No	No	No	No	No	No	No	No	No	No	0	No	0	No	0	No	0	No	No;No;No;No;No;No;No;No;No	Asymptomatic	Personal vehicle	Private	Never	No	Occasionally	Occ	Non vegetarian	NV
433	10.54	1	Positive	Male	Contractual Staff	35		OS		SU	SU	No	No	No	No	No	No	No	No		No	No	No	No	No	No	No	No	No	No	0	No	0	No	0	No	0	No	No;No;No;No;No;No;No;No;No	Asymptomatic	Personal vehicle	Private	Never	No	Never	No	Non vegetarian	NV
434	0.034	0	Negative	Male	Contractual Staff	34		OS		SU	SU	No	No	No	No	No	No	No	No		No	No	No	No	No	No	No	No	No	No	0	No	0	No	0	No	0	No	No;No;No;No;No;No;No;No;No	Asymptomatic	Personal vehicle	Private	Never	No	Occasionally	Occ	Occasionally non veg	NV
435	0.036	0	Negative	Male	Contractual Staff	33		OS		SU	SU	No	No	No	No	No	No	No	No		No	No	No	No	No	No	No	No	No	No	0	No	0	No	0	No	0	No	No;No;No;No;No;No;No;No;No	Asymptomatic	walk	Private	Sporadic	Yes	Occasionally	Occ	Non vegetarian	NV
436	0.037	0	Negative	Male	Contractual Staff	49		OS	B+	B	Positive	Yes	Yes	No	No	No	No	Yes	Yes	Negative	No	No	No	No	No	No	No	No	No	No	0	No	0	No	0	No	0	No	No;No;No;No;No;No;No;No;No	Asymptomatic	Personal vehicle	Private	Never	No	Never	No	Vegetarian	V
437	1.2	1	Positive	Male	Contractual Staff	46		OS		SU	SU	No	No	No	No	No	No	No	No		No	No	No	No	No	No	No	No		SU	0	No	0	No	0	No	0	No	No;No;No;No;SU;No;No;No;No	Asymptomatic	Personal vehicle	Private	Never	No	Occasionally	Occ	Non vegetarian	NV
438	28.13	1	Positive	Male	Contractual Staff	38		OS	B+	B	Positive	No	No	No	No	No	No	No	No		No	No	No	No	No	No	No	No	No	No	0	No	0	No	0	No	0	No	No;No;No;No;No;No;No;No;No	Asymptomatic	Shared cab	Public	Never	No	Never	No	Non vegetarian	NV
439	0.036	0	Negative	Male	Contractual Staff	41		OS		SU	SU	No	No	No	No	No	No	Yes	Yes	Negative	No	No	No	No	No	No	No	No	No	No	0	No	0	No	0	No	0	No	No;No;No;No;No;No;No;No;No	Asymptomatic	Personal vehicle	Private	Sporadic	Yes	Occasionally	Occ	Non vegetarian	NV
440	2.23	1	Positive	Male	Contractual Staff	25		OS		SU	SU	No	No	No	No	No	No	No	No		No	No	No	No	No	No	No	No	No	No	0	No	0	No	0	No	0	No	No;No;No;No;No;No;No;No;No	Asymptomatic	Personal vehicle	Private	Never	No	Occasionally	Occ	Non vegetarian	NV
441	13.34	1	Positive	Male	Contractual Staff	29		OS		SU	SU	No	No	No	No	No	No	No	No		No	No	No	No	No	No	No	No	No	No	0	No	0	No	0	No	0	No	No;No;No;No;No;No;No;No;No	Asymptomatic	Personal vehicle	Private	Never	No	Never	No	Non vegetarian	NV
442	0.044	0	Negative	Male	Contractual Staff	41		OS		SU	SU	No	No	No	No	No	No	No	No		No	No	No	No	No	No	No	No	No	No	0	No	0	No	0	No	0	No	No;No;No;No;No;No;No;No;No	Asymptomatic	Personal vehicle	Private	Never	No	Never	No	Non vegetarian	NV
443	0.041	0	Negative	Female	Contractual Staff	46		OS		SU	SU	No	No	No	No	No	No	No	No		No	No	No	No	No	No	No	No	No	No	0	No	0	No	0	No	0	No	No;No;No;No;No;No;No;No;No	Asymptomatic	by foot	Private	Never	No	Never	No	Non vegetarian	NV
444	0.22	0	Negative	Male	Contractual Staff	30		OS		SU	SU	No	No	No	No	No	No	Yes	Yes	Negative	No	No	No	No	No	No	No	No	No	No	0	No	0	No	0	No	0	No	No;No;No;No;No;No;No;No;No	Asymptomatic	Personal vehicle	Private	Never	No	Occasionally	Occ	Non vegetarian	NV
445	8.8	1	Positive	Male	Contractual Staff	30		OS		SU	SU	No	No	No	No	No	No	No	No		No	No	Yes	Yes	No	No	No	No	No	No	0	No	0	No	0	No	0	No	No;Yes;No;No;No;No;No;No;No	Symptomatic	Personal vehicle	Private	Never	No	Occasionally	Occ	Non vegetarian	NV
446	0.041	0	Negative	Male	Contractual Staff	36		OS		SU	SU	No	No	No	No	No	No	No	No		No	No	No	No	No	No	No	No	No	No	0	No	0	No	0	No	0	No	No;No;No;No;No;No;No;No;No	Asymptomatic	Personal vehicle	Private	Never	No	Occasionally	Occ	Non vegetarian	NV
447	10.96	1	Positive	Female	Contractual Staff	38		OS		SU	SU	No	No	No	No	No	No	No	No		No	No	No	No	No	No	No	No	No	No	0	No	0	No	0	No	0	No	No;No;No;No;No;No;No;No;No	Asymptomatic	Auto	Public	Never	No	Never	No	Non vegetarian	NV
448	0.043	0	Negative	Female	Contractual Staff	32		OS		SU	SU	No	No	No	No	No	No	No	No		No	No	No	No	No	No	No	No	No	No	0	No	0	No	0	No	0	No	No;No;No;No;No;No;No;No;No	Asymptomatic	Personal vehicle	Private	Never	No	Never	No	Non vegetarian	NV
449	34.33	1	Positive	Male	Contractual Staff	47		OS	B+	B	Positive	No	No	No	No	No	No	No	No		No	No	No	No	No	No	No	No	No	No	0	No	0	No	0	No	0	No	No;No;No;No;No;No;No;No;No	Asymptomatic	Personal vehicle	Private	Never	No	Never	No	Occasionally non veg	NV
450	0.041	0	Negative	Female	Contractual Staff	46		OS	A+	A	Positive	No	No	Yes	Yes	No	No	No	No		No	No	No	No	No	No	No	No	No	No	0	No	0	No	0	No	0	No	No;No;No;No;No;No;No;No;No	Asymptomatic	Personal vehicle	Private	Never	No	Never	No	Non vegetarian	NV
451	0.039	0	Negative	Male	Contractual Staff	33		OS		SU	SU	No	No	No	No	No	No	No	No		No	No	No	No	No	No	No	No	No	No	0	No	0	No	0	No	0	No	No;No;No;No;No;No;No;No;No	Asymptomatic	Personal vehicle	Private	Never	No	Occasionally	Occ	Non vegetarian	NV
452	0.038	0	Negative	Male	Contractual Staff	34		OS	O+	O	Positive	No	No	No	No	No	No	Yes	Yes	Negative	No	No	No	No	No	No	No	No	No	No	0	No	0	No	0	No	0	No	No;No;No;No;No;No;No;No;No	Asymptomatic	Personal vehicle	Private	Never	No	Never	No	Non vegetarian	NV
453	29.79	1	Positive	Male	Contractual Staff	55		OS		SU	SU	No	No	No	No	No	No	No	No		No	No	No	No	No	No	No	No	No	No	0	No	0	No	0	No	0	No	No;No;No;No;No;No;No;No;No	Asymptomatic	Personal vehicle	Private	Never	No	Never	No	Non vegetarian	NV
454	0.04	0	Negative	Female	Contractual Staff	47		OS		SU	SU	No	No	No	No	No	No	No	No		No	No	No	No	No	No	No	No	No	No	0	No	0	No	0	No	0	No	No;No;No;No;No;No;No;No;No	Asymptomatic	Personal vehicle	Private	Never	No	Never	No	Occasionally non veg	NV
455	0.039	0	Negative	Male	Staff	56		S	B+	B	Positive	Yes	Yes	Yes	Yes	No	No	No	No		No	No	No	No	No	No	No	No	No	No	0	No	0	No	0	No	0	No	No;No;No;No;No;No;No;No;No	Asymptomatic	Personal vehicle	Private	Never	No	Occasionally	Occ	Occasionally non veg	NV
456	31.28	1	Positive	Male	Contractual Staff	48		OS		SU	SU	No	No	No	No	No	No	Yes	Yes	Negative	No	No	No	No	No	No	No	No	No	No	0	No	0	No	0	No	0	No	No;No;No;No;No;No;No;No;No	Asymptomatic	Personal vehicle	Private	Never	No	Occasionally	Occ	Occasionally non veg	NV
457	0.079	0	Negative	Male	Contractual Staff	41		OS	A+	A	Positive	No	No	No	No	No	No	No	No		No	No	No	No	No	No	No	No	No	No	0	No	0	No	0	No	0	No	No;No;No;No;No;No;No;No;No	Asymptomatic	Personal vehicle	Private	Never	No	Occasionally	Occ	Non vegetarian	NV
458	0.041	0	Negative	Male	Contractual Staff	45		OS	B+	B	Positive	No	No	No	No	No	No	No	No		No	No	No	No	No	No	No	No	No	No	0	No	0	No	0	No	0	No	No;No;No;No;No;No;No;No;No	Asymptomatic	Personal vehicle	Private	Never	No	Never	No	Non vegetarian	NV
459	0.09	0	Negative	Female	Contractual Staff	42		OS		SU	SU	No	No	No	No	No	No	No	No		No	No	No	No	No	No	No	No	No	No	0	No	0	No	0	No	0	No	No;No;No;No;No;No;No;No;No	Asymptomatic	Personal vehicle	Private	Never	No	Never	No	Non vegetarian	NV
460	0.043	0	Negative	Male	Contractual Staff	40		OS		SU	SU	No	No	No	No	No	No	Yes	Yes	Negative	No	No	No	No	No	No	No	No	No	No	0	No	0	No	0	No	0	No	No;No;No;No;No;No;No;No;No	Asymptomatic	Personal vehicle	Private	Never	No	Occasionally	Occ	Non vegetarian	NV
461	0.042	0	Negative	Female	Contractual Staff	52		OS	O+	O	Positive	No	No	No	No	No	No	No	No		No	No	No	No	No	No	No	No	No	No	0	No	0	No	0	No	0	No	No;No;No;No;No;No;No;No;No	Asymptomatic	Public transport	Public	Never	No	Never	No	Occasionally non veg	NV
462	0.039	0	Negative	Male	Contractual Staff	31		OS		SU	SU	No	No	No	No	No	No	No	No		No	No	No	No	No	No	No	No	No	No	0	No	0	No	0	No	0	No	No;No;No;No;No;No;No;No;No	Asymptomatic	Personal vehicle	Private	Never	No	Never	No	Non vegetarian	NV
463	49.94	1	Positive	Female	Contractual Staff	38		OS		SU	SU	No	No	No	No	No	No	No	No		No	No	No	No	No	No	No	No	No	No	0	No	0	No	0	No	0	No	No;No;No;No;No;No;No;No;No	Asymptomatic	Personal vehicle	Private	Never	No	Never	No	Non vegetarian	NV
464	36.17	1	Positive	Male	Contractual Staff	38		OS		SU	SU	No	No	No	No	No	No	No	No		No	No	No	No	No	No	No	No	No	No	0	No	0	No	0	No	0	No	No;No;No;No;No;No;No;No;No	Asymptomatic	Personal vehicle	Private	Never	No	Occasionally	Occ	Non vegetarian	NV
465	0.4	0	Negative	Male	Contractual Staff	48		OS		SU	SU	No	No	No	No	No	No	No	No		No	No	No	No	No	No	No	No	No	No	0	No	0	No	0	No	0	No	No;No;No;No;No;No;No;No;No	Asymptomatic	Personal vehicle	Private	Never	No	Occasionally	Occ	Non vegetarian	NV
466	0.044	0	Negative	Male	Contractual Staff	53		OS		SU	SU	No	No	No	No	No	No	No	No		No	No	No	No	No	No	No	No	No	No	0	No	0	No	0	No	0	No	No;No;No;No;No;No;No;No;No	Asymptomatic	colleague vehicle	Private	Never	No	Never	No	Vegetarian	V
467	0.053	0	Negative	Female	Contractual Staff	41		OS	B+	B	Positive	No	No	No	No	No	No	No	No		No	No	No	No	No	No	No	No	No	No	0	No	0	No	0	No	0	No	No;No;No;No;No;No;No;No;No	Asymptomatic	Personal vehicle	Private	Never	No	Never	No	Non vegetarian	NV
468	0.043	0	Negative	Female	Contractual Staff	41		OS	O-	O	Negative	No	No	No	No	No	No	No	No		No	No	No	No	No	No	No	No	No	No	0	No	0	No	0	No	0	No	No;No;No;No;No;No;No;No;No	Asymptomatic	Personal vehicle	Private	Never	No	Never	No	Non vegetarian	NV
469	0.044	0	Negative	Male	Contractual Staff	26		OS	O+	O	Positive	No	No	No	No	No	No	No	No		No	No	No	No	No	No	No	No	No	No	0	No	0	No	0	No	0	No	No;No;No;No;No;No;No;No;No	Asymptomatic	Personal vehicle	Private	Never	No	Occasionally	Occ	Non vegetarian	NV
470	0.049	0	Negative	Female	Contractual Staff	51		OS	B+	B	Positive	No	No	No	No	No	No	No	No		No	No	No	No	No	No	No	No	No	No	0	No	0	No	0	No	0	No	No;No;No;No;No;No;No;No;No	Asymptomatic	Personal vehicle	Private	Never	No	Never	No	Non vegetarian	NV
471	6.53	1	Positive	Male	Contractual Staff	25		OS		SU	SU	No	No	No	No	No	No	No	No		No	No	No	No	No	No	No	No	No	No	0	No	0	No	0	No	0	No	No;No;No;No;No;No;No;No;No	Asymptomatic	Auto	Public	Never	No	Never	No	Non vegetarian	NV
472	0.045	0	Negative	Female	Staff	45		S	O+	O	Positive	No	No	No	No	No	No	No	No		No	No	No	No	No	No	No	No	No	No	2	No	0	No	0	No	0	No	No;No;No;No;No;No;No;No;No	Asymptomatic	Auto	Public	Never	No	Never	No	Non vegetarian	NV
473	48.64	1	Positive	Female	Contractual Staff	40		OS		SU	SU	No	No	No	No	No	No	No	No		No	No	No	No	No	No	No	No	No	No	0	No	0	No	0	No	0	No	No;No;No;No;No;No;No;No;No	Asymptomatic	Public transport	Public	Never	No	Never	No	Non vegetarian	NV
474	0.0921	0	Negative	Male	Contractual Staff	23		OS		SU	SU	No	No	No	No	No	No	No	No		No	No	No	No	No	No	No	No	No	No	0	No	0	No	0	No	0	No	No;No;No;No;No;No;No;No;No	Asymptomatic	Personal vehicle	Private	Never	No	Occasionally	Occ	Non vegetarian	NV
475	48.58	1	Positive	Male	Contractual Staff	45		OS		SU	SU	No	No	No	No	No	No	No	No		No	No	No	No	No	No	No	No	No	No	0	No	0	No	0	No	0	No	No;No;No;No;No;No;No;No;No	Asymptomatic	Personal vehicle	Private	Never	No	Never	No	Non vegetarian	NV
476	9.05	1	Positive	Male	Contractual Staff	51		OS	O+	O	Positive	Yes	Yes	No	No	No	No	Yes	Yes	Negative	No	No	No	No	No	No	No	No	No	No	0	No	2	No	0	No	0	No	No;No;No;No;No;No;No;No;No	Asymptomatic	Personal vehicle	Private	Never	No	Occasionally	Occ	Non vegetarian	NV
477	70.89	1	Positive	Male	Contractual Staff	47		OS	B-	B	Negative	Yes	Yes	Yes	Yes	No	No	Yes	Yes	Positive	No	No	No	No	No	No	No	No	No	No	0	No	0	No	0	No	0	No	No;No;No;No;No;No;No;No;No	Asymptomatic	Personal vehicle	Private	Never	No	Occasionally	Occ	Non vegetarian	NV
478	0.046	0	Negative	Male	Contractual Staff	29		OS	O+	O	Positive	No	No	No	No	No	No	No	No		No	No	No	No	No	No	No	No	No	No	0	No	0	No	0	No	0	No	No;No;No;No;No;No;No;No;No	Asymptomatic	Personal vehicle	Private	Never	No	Never	No	Non vegetarian	NV
479	0.046	0	Negative	Female	Contractual Staff	38		OS		SU	SU	No	No	No	No	No	No	Yes	Yes	Negative	No	No	No	No	No	No	No	No	No	No	0	No	0	No	0	No	0	No	No;No;No;No;No;No;No;No;No	Asymptomatic	Personal vehicle	Private	Never	No	Never	No	Non vegetarian	NV
480	0.064	0	Negative	Male	Contractual Staff	35		OS	B+	B	Positive	No	No	No	No	No	No	No	No		No	No	No	No	No	No	No	No	No	No	0	No	0	No	0	No	0	No	No;No;No;No;No;No;No;No;No	Asymptomatic	Personal vehicle	Private	Never	No	Occasionally	Occ	Non vegetarian	NV
481	1.89	1	Positive	Male	Contractual Staff	42		OS		SU	SU	No	No	No	No	No	No	No	No		No	No	No	No	No	No	No	No	No	No	0	No	0	No	0	No	0	No	No;No;No;No;No;No;No;No;No	Asymptomatic	Personal vehicle	Private	Never	No	Never	No	Non vegetarian	NV
482	28.54	1	Positive	Male	Contractual Staff	35		OS		SU	SU	No	No	Yes	Yes	No	No	Yes	Yes	Negative	No	No	No	No	No	No	No	No	No	No	0	No	0	No	0	No	0	No	No;No;No;No;No;No;No;No;No	Asymptomatic	Personal vehicle	Private	Never	No	Never	No	Non vegetarian	NV
483	41.38	1	Positive	Male	Contractual Staff	41		OS		SU	SU	No	No	No	No	No	No	No	No		No	No	No	No	No	No	No	No	No	No	0	No	0	No	0	No	0	No	No;No;No;No;No;No;No;No;No	Asymptomatic	Personal vehicle	Private	Never	No	Never	No	Non vegetarian	NV
484	13.69	1	Positive	Male	Contractual Staff	48		OS	O+	O	Positive	No	No	No	No	No	No	No	No		No	No	No	No	No	No	No	No	No	No	0	No	0	No	0	No	0	No	No;No;No;No;No;No;No;No;No	Asymptomatic	Personal vehicle	Private	Never	No	Never	No	Non vegetarian	NV
485	0.431	0	Negative	Male	Contractual Staff	39		OS		SU	SU	No	No	Yes	Yes	No	No	No	No		No	No	No	No	No	No	No	No	No	No	0	No	0	No	0	No	0	No	No;No;No;No;No;No;No;No;No	Asymptomatic	Personal vehicle	Private	Never	No	Never	No	Non vegetarian	NV
486	0.049	0	Negative	Male	Contractual Staff	40		OS		SU	SU	No	No	No	No	No	No	No	No		No	No	No	No	No	No	No	No	No	No	0	No	0	No	0	No	0	No	No;No;No;No;No;No;No;No;No	Asymptomatic	Public transport	Public	Never	No	Never	No	Non vegetarian	NV
487	11.13	1	Positive	Male	Contractual Staff	41		OS	O+	O	Positive	No	No	No	No	No	No	No	No		No	No	No	No	No	No	No	No	No	No	0	No	0	No	0	No	0	No	No;No;No;No;No;No;No;No;No	Asymptomatic	Personal vehicle	Private	Sporadic	Yes	Occasionally	Occ	Non vegetarian	NV
488	59.33	1	Positive	Female	Contractual Staff	50		OS		SU	SU	No	No	No	No	No	No	No	No		No	No	No	No	No	No	No	No	No	No	0	No	0	No	0	No	0	No	No;No;No;No;No;No;No;No;No	Asymptomatic	Personal vehicle	Private	Never	No	Never	No	Non vegetarian	NV
489	0.047	0	Negative	Female	Contractual Staff	28		OS		SU	SU	No	No	No	No	No	No	No	No		No	No	No	No	No	No	No	No	No	No	0	No	0	No	0	No	0	No	No;No;No;No;No;No;No;No;No	Asymptomatic	Personal vehicle	Private	Never	No	Never	No	Non vegetarian	NV
490	0.05	0	Negative	Female	Contractual Staff	36		OS		SU	SU	No	No	No	No	No	No	No	No		No	No	No	No	No	No	No	No	No	No	0	No	0	No	0	No	0	No	No;No;No;No;No;No;No;No;No	Asymptomatic	Public transport	Public	Never	No	Never	No	Non vegetarian	NV
491	18.53	1	Positive	Female	Contractual Staff	45		OS		SU	SU	No	No	No	No	No	No	No	No		No	No	No	No	No	No	No	No	No	No	0	No	0	No	0	No	0	No	No;No;No;No;No;No;No;No;No	Asymptomatic	WALKING	Private	Never	No	Never	No	Non vegetarian	NV
492	0.146	0	Negative	Male	Contractual Staff	45		OS	AB+	AB	Positive	No	No	No	No	No	No	No	No		No	No	No	No	No	No	No	No	No	No	0	No	0	No	0	No	0	No	No;No;No;No;No;No;No;No;No	Asymptomatic	Personal vehicle	Private	Never	No	Never	No	Occasionally non veg	NV
493	0.052	0	Negative	Male	Contractual Staff	33		OS		SU	SU	No	No	No	No	No	No	No	No		No	No	No	No	No	No	No	No	No	No	0	No	0	No	0	No	0	No	No;No;No;No;No;No;No;No;No	Asymptomatic	Personal vehicle	Private	Never	No	Occasionally	Occ	Vegetarian	V
494	0.048	0	Negative	Male	Contractual Staff	34		OS		SU	SU	No	No	No	No	No	No	No	No		No	No	No	No	No	No	No	No	No	No	0	No	0	No	0	No	0	No	No;No;No;No;No;No;No;No;No	Asymptomatic	Personal vehicle	Private	Never	No	Never	No	Non vegetarian	NV
495	9.03	1	Positive	Male	Contractual Staff	35		OS	O+	O	Positive	No	No	No	No	No	No	No	No		No	No	No	No	No	No	No	No	No	No	0	No	0	No	0	No	0	No	No;No;No;No;No;No;No;No;No	Asymptomatic	Personal vehicle	Private	Never	No	Occasionally	Occ	Non vegetarian	NV
496	0.05	0	Negative	Male	Contractual Staff	30		OS		SU	SU	No	No	No	No	No	No	No	No		No	No	No	No	No	No	No	No	No	No	0	No	0	No	0	No	0	No	No;No;No;No;No;No;No;No;No	Asymptomatic	Personal vehicle	Private	Never	No	Never	No	Non vegetarian	NV
497	0.047	0	Negative	Male	Contractual Staff	57		OS	O-	O	Negative	No	No	No	No	No	No	No	No		No	No	No	No	No	No	No	No	No	No	0	No	0	No	0	No	0	No	No;No;No;No;No;No;No;No;No	Asymptomatic	Public transport	Public	Never	No	Occasionally	Occ	Non vegetarian	NV
498	0.048	0	Negative	Female	Contractual Staff	30		OS		SU	SU	No	No	No	No	No	No	No	No		No	No	No	No	No	No	No	No	No	No	0	No	0	No	0	No	0	No	No;No;No;No;No;No;No;No;No	Asymptomatic	Public transport	Public	Never	No	Never	No	Non vegetarian	NV
499	4.32	1	Positive	Female	Contractual Staff	40		OS		SU	SU	No	No	No	No	No	No	No	No		No	No	No	No	No	No	No	No	No	No	0	No	0	No	0	No	0	No	No;No;No;No;No;No;No;No;No	Asymptomatic	Personal vehicle	Private	Never	No	Never	No	Non vegetarian	NV
500	0.047	0	Negative	Male	Contractual Staff	40		OS		SU	SU	No	No	No	No	No	No	Yes	Yes	Negative	No	No	No	No	No	No	No	No	No	No	0	No	0	No	0	No	0	No	No;No;No;No;No;No;No;No;No	Asymptomatic	Personal vehicle	Private	Never	No	Occasionally	Occ	Non vegetarian	NV
501	0.052	0	Negative	Female	Staff	34		S	O+	O	Positive	No	No	No	No	No	No	No	No		No	No	Yes	Yes	No	No	No	No	No	No	1	No	1	No	2	No	1	No	No;Yes;No;No;No;No;No;No;No	Symptomatic	Personal vehicle	Private	Never	No	Never	No	Occasionally non veg	NV
502	0.05	0	Negative	Male	Others	49		SU	A+	A	Positive	No	No	No	No	No	No	No	No		No	No	No	No	No	No	No	No	No	No	0	No	0	No	0	No	0	No	No;No;No;No;No;No;No;No;No	Asymptomatic	Personal vehicle	Private	Never	No	Never	No	Occasionally non veg	NV
503	0.051	0	Negative	Male	Contractual Staff	35		OS	O+	O	Positive	No	No	No	No	No	No	No	No		No	No	No	No	No	No	No	No	No	No	0	No	0	No	0	No	0	No	No;No;No;No;No;No;No;No;No	Asymptomatic	Personal vehicle	Private	Never	No	Never	No	Non vegetarian	NV
504	0.051	0	Negative	Male	Others	49		SU	B+	B	Positive	No	No	No	No	No	No	No	No		No	No	No	No	No	No	No	No	No	No	0	No	0	No	0	No	0	No	No;No;No;No;No;No;No;No;No	Asymptomatic	Personal vehicle	Private	Never	No	Never	No	Occasionally non veg	NV
505	0.051	0	Negative	Male	Others	49		SU		SU	SU	No	No	No	No	No	No	No	No		No	No	No	No	No	No	No	No	No	No	0	No	0	No	0	No	0	No	No;No;No;No;No;No;No;No;No	Asymptomatic	Personal vehicle	Private	Never	No	Never	No	Occasionally non veg	NV
506	0.05	0	Negative	Male	Contractual Staff	30		OS		SU	SU	Yes	Yes	No	No	No	No	No	No		No	No	No	No	No	No	No	No	No	No	0	No	0	No	0	No	0	No	No;No;No;No;No;No;No;No;No	Asymptomatic	Personal vehicle	Private	Never	No	Never	No	Occasionally non veg	NV
507	0.049	0	Negative	Male	Others	50		SU		SU	SU	No	No	No	No	No	No	No	No		Yes	Yes	Yes	Yes	Yes	Yes	No	No	No	No	0	No	0	No	0	No	0	No	Yes;Yes;Yes;No;No;No;No;No;No	Symptomatic	Personal vehicle	Private	Never	No	Occasionally	Occ	Occasionally non veg	NV
508	0.106	0	Negative	Male	Others	41		SU	O+	O	Positive	No	No	No	No	No	No	No	No		No	No	No	No	No	No	No	No	No	No	0	No	0	No	0	No	0	No	No;No;No;No;No;No;No;No;No	Asymptomatic	Personal vehicle	Private	Never	No	Never	No	Occasionally non veg	NV
509	0.09	0	Negative	Male	Others	35		SU	O+	O	Positive	No	No	No	No	No	No	No	No		No	No	No	No	No	No	No	No	No	No	0	No	0	No	0	No	0	No	No;No;No;No;No;No;No;No;No	Asymptomatic	Personal vehicle	Private	Never	No	Occasionally	Occ	Occasionally non veg	NV
510	0.049	0	Negative	Male	Others	45		SU		SU	SU	No	No	No	No	No	No	No	No		No	No	No	No	No	No	No	No	No	No	0	No	0	No	0	No	0	No	No;No;No;No;No;No;No;No;No	Asymptomatic	By Walk	Private	Never	No	Never	No	Occasionally non veg	NV
511	0.048	0	Negative	Male	Others	32		SU		SU	SU	No	No	No	No	No	No	No	No		No	No	No	No	No	No	No	No	No	No	0	No	0	No	0	No	0	No	No;No;No;No;No;No;No;No;No	Asymptomatic	Personal vehicle	Private	Never	No	Occasionally	Occ	Occasionally non veg	NV
512	3.2	1	Positive	Male	Others	24		SU		SU	SU	No	No	No	No	No	No	No	No		No	No	No	No	No	No	No	No	No	No	0	No	0	No	0	No	0	No	No;No;No;No;No;No;No;No;No	Asymptomatic	Personal vehicle	Private	Never	No	Never	No	Occasionally non veg	NV
513	0.05	0	Negative	Female	Others	52		SU	B+	B	Positive	No	No	No	No	No	No	No	No		No	No	No	No	No	No	No	No	No	No	0	No	0	No	0	No	0	No	No;No;No;No;No;No;No;No;No	Asymptomatic	Personal vehicle	Private	Never	No	Never	No	Occasionally non veg	NV
514	0.05	0	Negative	Female	Others	49		SU		SU	SU	No	No	No	No	No	No	No	No		No	No	No	No	No	No	No	No	No	No	0	No	0	No	0	No	0	No	No;No;No;No;No;No;No;No;No	Asymptomatic	By walk	Private	Never	No	Never	No	Vegetarian	V
515	0.05	0	Negative	Female	Others	42		SU		SU	SU	No	No	Yes	Yes	Yes	Yes	No	No		No	No	No	No	No	No	No	No	No	No	0	No	2	No	2	No	0	No	No;No;No;No;No;No;No;No;No	Asymptomatic	Personal vehicle	Private	Never	No	Never	No	Occasionally non veg	NV
516	9.54	1	Positive	Female	Others	50		SU		SU	SU	No	No	No	No	No	No	No	No		No	No	No	No	No	No	No	No	No	No	0	No	0	No	0	No	0	No	No;No;No;No;No;No;No;No;No	Asymptomatic	Personal vehicle	Private	Never	No	Never	No	Occasionally non veg	NV
517	37.69	1	Positive	Female	Others	44		SU	AB+	AB	Positive	Yes	Yes	Yes	Yes	No	No	No	No		No	No	No	No	No	No	No	No	No	No	0	No	0	No	0	No	0	No	No;No;No;No;No;No;No;No;No	Asymptomatic	Shared cab	Public	Never	No	Never	No	Occasionally non veg	NV
518	0.054	0	Negative	Male	Staff	35		S	AB+	AB	Positive	No	No	No	No	No	No	No	No		No	No	No	No	No	No	No	No	No	No	1	No	0	No	0	No	0	No	No;No;No;No;No;No;No;No;No	Asymptomatic	Public transport	Public	Sporadic	Yes	Occasionally	Occ	Non vegetarian	NV
519	0.062	0	Negative	Female	Staff	36		S	A+	A	Positive	No	No	No	No	No	No	No	No		No	No	No	No	No	No	No	No	No	No	0	No	0	No	0	No	0	No	No;No;No;No;No;No;No;No;No	Asymptomatic	Office Vehicle	Private	Never	No	Never	No	Occasionally non veg	NV
520	0.067	0	Negative	Male	Student	29		S	A+	A	Positive	No	No	No	No	No	No	Yes	Yes	Negative	No	No	No	No	No	No	No	No	No	No	1	No	1	No	2	No	0	No	No;No;No;No;No;No;No;No;No	Asymptomatic	Personal vehicle	Private	Never	No	Occasionally	Occ	Occasionally non veg	NV
521	0.05	0	Negative	Male	Others	47		SU		SU	SU	No	No	No	No	No	No	No	No		No	No	No	No	No	No	No	No	No	No	0	No	0	No	0	No	0	No	No;No;No;No;No;No;No;No;No	Asymptomatic	Personal vehicle	Private	Sporadic	Yes	Occasionally	Occ	Occasionally non veg	NV
522	0.054	0	Negative	Male	Others	38		SU	B+	B	Positive	No	No	No	No	No	No	Yes	Yes	Negative	No	No	No	No	No	No	No	No	No	No	0	No	0	No	1	No	0	No	No;No;No;No;No;No;No;No;No	Asymptomatic	Personal vehicle	Private	Never	No	Never	No	Occasionally non veg	NV
523	0.05	0	Negative	Female	Others	44		SU		SU	SU	No	No	No	No	No	No	No	No		Yes	Yes	Yes	Yes	Yes	Yes	No	No	No	No	0	No	0	No	0	No	0	No	Yes;Yes;Yes;No;No;No;No;No;No	Symptomatic	Shared cab	Public	Never	No	Never	No	Occasionally non veg	NV
524	0.052	0	Negative	Female	Others	33		SU		SU	SU	No	No	No	No	No	No	No	No		No	No	No	No	No	No	No	No	No	No	0	No	0	No	0	No	0	No	No;No;No;No;No;No;No;No;No	Asymptomatic	Auto	Public	Never	No	Never	No	Occasionally non veg	NV
525	51.43	1	Positive	Male	Others	44		SU		SU	SU	No	No	No	No	No	No	No	No		No	No	No	No	No	No	No	No	No	No	0	No	0	No	0	No	0	No	No;No;No;No;No;No;No;No;No	Asymptomatic	Shared cab	Public	Never	No	Occasionally	Occ	Occasionally non veg	NV
526	0.052	0	Negative	Male	Staff	59		S	A+	A	Positive	Yes	Yes	No	No	No	No	No	No		No	No	No	No	No	No	No	No	No	No	0	No	0	No	0	No	0	No	No;No;No;No;No;No;No;No;No	Asymptomatic	Personal vehicle	Private	Never	No	Never	No	Vegetarian	V
527	43.03	1	Positive	Male	Contractual Staff	44		OS		SU	SU	No	No	No	No	No	No	Yes	Yes	Negative	No	No	No	No	No	No	No	No	No	No	0	No	0	No	0	No	0	No	No;No;No;No;No;No;No;No;No	Asymptomatic	Personal vehicle	Private	Never	No	Never	No	Non vegetarian	NV
528	0.063	0	Negative	Female	Staff	25		S	B-	B	Negative	No	No	No	No	No	No	No	No		No	No	No	No	No	No	No	No	No	No	1	No	0	No	0	No	0	No	No;No;No;No;No;No;No;No;No	Asymptomatic	Public transport	Public	Never	No	Never	No	Vegetarian	V
529	0.051	0	Negative	Male	Student	22		S	B-	B	Negative	No	No	No	No	No	No	No	No		No	No	No	No	No	No	No	No	No	No	2	No	0	No	1	No	0	No	No;No;No;No;No;No;No;No;No	Asymptomatic	ccmb shuttle	Private	Never	No	Occasionally	Occ	Occasionally non veg	NV
530	0.051	0	Negative	Male	Others	47		SU		SU	SU	Yes	Yes	No	No	No	No	No	No		No	No	No	No	No	No	No	No	No	No	0	No	0	No	0	No	0	No	No;No;No;No;No;No;No;No;No	Asymptomatic	Personal vehicle	Private	Never	No	Never	No	Occasionally non veg	NV
531	0.048	0	Negative	Male	Faculty	54		S	B+	B	Positive	No	No	No	No	No	No	No	No		No	No	No	No	No	No	No	No	No	No	1	No	1	No	1	No	0	No	No;No;No;No;No;No;No;No;No	Asymptomatic	Personal vehicle	Private	Never	No	Occasionally	Occ	Occasionally non veg	NV
532	0.048	0	Negative	Male	Others	52		SU	O+	O	Positive	No	No	No	No	No	No	No	No		No	No	No	No	No	No	No	No	No	No	0	No	0	No	0	No	0	No	No;No;No;No;No;No;No;No;No	Asymptomatic	Personal vehicle	Private	Never	No	Never	No	Non vegetarian	NV
533	0.052	0	Negative	Male	Contractual Staff	30		OS	A+	A	Positive	No	No	No	No	No	No	No	No		No	No	No	No	No	No	No	No	No	No	0	No	0	No	0	No	0	No	No;No;No;No;No;No;No;No;No	Asymptomatic	By walk	Private	Never	No	Never	No	Occasionally non veg	NV
534	0.049	0	Negative	Male	Student	24		S	A+	A	Positive	No	No	No	No	No	No	No	No		No	No	Yes	Yes	Yes	Yes	No	No	No	No	1	No	0	No	1	No	1	No	No;Yes;Yes;No;No;No;No;No;No	Symptomatic	Cab	Public	Regular	Yes	Occasionally	Occ	Non vegetarian	NV
535	9.21	1	Positive	Male	Contractual Staff	24		OS	B-	B	Negative	No	No	No	No	No	No	Yes	Yes	Negative	No	No	No	No	No	No	No	No	No	No	3	Yes	0	No	0	No	0	No	No;No;No;No;No;Yes;No;No;No	Symptomatic	Personal vehicle	Private	Never	No	Never	No	Occasionally non veg	NV
536	0.05	0	Negative	Male	Others	25		SU		SU	SU	No	No	No	No	No	No	No	No		No	No	No	No	No	No	No	No	No	No	0	No	0	No	0	No	0	No	No;No;No;No;No;No;No;No;No	Asymptomatic	Personal vehicle	Private	Never	No	Never	No	Occasionally non veg	NV
537	0.053	0	Negative	Male	Contractual Staff	20		OS		SU	SU	No	No	No	No	No	No	No	No		No	No	No	No	No	No	No	No	No	No	0	No	1	No	0	No	0	No	No;No;No;No;No;No;No;No;No	Asymptomatic	Personal vehicle	Private	Never	No	Occasionally	Occ	Non vegetarian	NV
538	19.3	1	Positive	Male	Others	39		SU		SU	SU	No	No	No	No	No	No	No	No		No	No	No	No	No	No	No	No	No	No	0	No	0	No	0	No	0	No	No;No;No;No;No;No;No;No;No	Asymptomatic	Personal vehicle	Private	Never	No	Occasionally	Occ	Occasionally non veg	NV
539	0.051	0	Negative	Male	Others	47		SU	O+	O	Positive	No	No	No	No	No	No	No	No		No	No	No	No	No	No	No	No	No	No	0	No	0	No	0	No	0	No	No;No;No;No;No;No;No;No;No	Asymptomatic	Personal vehicle	Private	Never	No	Occasionally	Occ	Occasionally non veg	NV
540	64.46	1	Positive	Male	Contractual Staff	50		OS	B+	B	Positive	No	No	No	No	No	No	No	No		No	No	No	No	No	No	No	No	No	No	0	No	0	No	0	No	0	No	No;No;No;No;No;No;No;No;No	Asymptomatic	Personal vehicle	Private	Never	No	Never	No	Non vegetarian	NV
541	0.052	0	Negative	Male	Others	27		SU	O+	O	Positive	No	No	No	No	No	No	No	No		No	No	No	No	No	No	No	No	No	No	1	No	0	No	0	No	0	No	No;No;No;No;No;No;No;No;No	Asymptomatic	Personal vehicle	Private	Never	No	Never	No	Non vegetarian	NV
542	0.05	0	Negative	Male	Contractual Staff	50		OS		SU	SU	No	No	No	No	No	No	No	No		No	No	No	No	No	No	No	No	No	No	0	No	0	No	0	No	0	No	No;No;No;No;No;No;No;No;No	Asymptomatic	Personal vehicle	Private	Never	No	Occasionally	Occ	Occasionally non veg	NV
543	0.319	0	Negative	Male	Others	39		SU		SU	SU	No	No	No	No	No	No	No	No		No	No	No	No	No	No	No	No	No	No	0	No	0	No	0	No	0	No	No;No;No;No;No;No;No;No;No	Asymptomatic	Personal vehicle	Private	Sporadic	Yes	Never	No	Occasionally non veg	NV
544	3.12	1	Positive	Male	Contractual Staff	46		OS		SU	SU	No	No	No	No	No	No	No	No		No	No	No	No	No	No	No	No	No	No	0	No	0	No	0	No	0	No	No;No;No;No;No;No;No;No;No	Asymptomatic	Public transport	Public	Never	No	Never	No	Non vegetarian	NV
545	0.057	0	Negative	Male	Others	56		SU	B+	B	Positive	Yes	Yes	No	No	No	No	No	No		No	No	No	No	No	No	No	No	No	No	0	No	0	No	0	No	0	No	No;No;No;No;No;No;No;No;No	Asymptomatic	Personal vehicle	Private	Never	No	Never	No	Vegetarian	V
546	0.05	0	Negative	Male	Others	38		SU		SU	SU	No	No	No	No	No	No	No	No		No	No	No	No	No	No	No	No	No	No	0	No	0	No	0	No	0	No	No;No;No;No;No;No;No;No;No	Asymptomatic	Personal vehicle	Private	Never	No	Never	No	Occasionally non veg	NV
547	0.05	0	Negative	Female	Contractual Staff	23		OS	B+	B	Positive	No	No	No	No	No	No	No	No		No	No	No	No	No	No	No	No	No	No	1	No	0	No	0	No	0	No	No;No;No;No;No;No;No;No;No	Asymptomatic	Auto	Public	Never	No	Never	No	Non vegetarian	NV
548	0.051	0	Negative	Male	Faculty	48		S	B+	B	Positive	No	No	No	No	No	No	No	No		No	No	No	No	No	No	No	No	No	No	0	No	0	No	0	No	0	No	No;No;No;No;No;No;No;No;No	Asymptomatic	Personal vehicle	Private	Never	No	Occasionally	Occ	Occasionally non veg	NV
549	0.05	0	Negative	Male	Others	30		SU	B+	B	Positive	No	No	No	No	No	No	No	No		No	No	No	No	No	No	No	No	No	No	0	No	0	No	0	No	0	No	No;No;No;No;No;No;No;No;No	Asymptomatic	Personal vehicle	Private	Never	No	Occasionally	Occ	Occasionally non veg	NV
550	0.049	0	Negative	Female	Others	30		SU	B+	B	Positive	No	No	No	No	No	No	No	No		No	No	No	No	No	No	No	No	No	No	2	No	2	No	0	No	0	No	No;No;No;No;No;No;No;No;No	Asymptomatic	Personal vehicle	Private	Never	No	Never	No	Occasionally non veg	NV
551	0.049	0	Negative	Female	Others	50		SU		SU	SU	No	No	No	No	No	No	No	No		No	No	No	No	No	No	No	No	No	No	0	No	0	No	0	No	1	No	No;No;No;No;No;No;No;No;No	Asymptomatic	Personal vehicle	Private	Never	No	Never	No	Occasionally non veg	NV
552	0.048	0	Negative	Male	Others	54		SU		SU	SU	Yes	Yes	No	No	No	No	No	No		No	No	No	No	No	No	No	No	No	No	0	No	0	No	0	No	0	No	No;No;No;No;No;No;No;No;No	Asymptomatic	Personal vehicle	Private	Never	No	Occasionally	Occ	Non vegetarian	NV
553	0.047	0	Negative	Male	Others	55		SU	O+	O	Positive	No	No	No	No	No	No	No	No		No	No	Yes	Yes	No	No	No	No	No	No	1	No	1	No	0	No	0	No	No;Yes;No;No;No;No;No;No;No	Symptomatic	Personal vehicle	Private	Never	No	Never	No	Non vegetarian	NV
554	0.048	0	Negative	Male	Staff	57		S	A+	A	Positive	No	No	No	No	No	No	No	No		No	No	No	No	No	No	No	No	No	No	0	No	0	No	0	No	0	No	No;No;No;No;No;No;No;No;No	Asymptomatic	Personal vehicle	Private	Regular	Yes	Never	No	Vegetarian	V
555	0.048	0	Negative	Male	Contractual Staff	26		OS	B+	B	Positive	No	No	No	No	No	No	No	No		No	No	No	No	No	No	No	No	No	No	3	Yes	4	Yes	2	No	2	No	No;No;No;No;No;Yes;Yes;No;No	Symptomatic	Personal vehicle	Private	Never	No	Never	No	Vegetarian	V
556	16.82	1	Positive	Male	Staff	58		S	O-	O	Negative	No	No	No	No	No	No	No	No		No	No	No	No	No	No	No	No	No	No	1	No	0	No	0	No	0	No	No;No;No;No;No;No;No;No;No	Asymptomatic	Personal vehicle	Private	Never	No	Never	No	Occasionally non veg	NV
557	0.05	0	Negative	Male	Staff	35		S	O+	O	Positive	No	No	No	No	No	No	No	No		No	No	No	No	No	No	No	No	No	No	0	No	0	No	0	No	0	No	No;No;No;No;No;No;No;No;No	Asymptomatic	Personal vehicle	Private	Never	No	Occasionally	Occ	Occasionally non veg	NV
558	0.049	0	Negative	Male	Staff	55		S	B-	B	Negative	No	No	No	No	No	No	No	No		No	No	No	No	No	No	No	No	No	No	0	No	0	No	0	No	0	No	No;No;No;No;No;No;No;No;No	Asymptomatic	Personal vehicle	Private	Never	No	Never	No	Vegetarian	V
559	58.51	1	Positive	Male	Staff	46		S	O+	O	Positive	No	No	No	No	No	No	Yes	Yes	Positive	Yes	Yes	Yes	Yes	No	No		SU		SU	2	No	4	Yes	4	Yes	1	No	Yes;Yes;No;SU;SU;No;Yes;Yes;No	Symptomatic	Personal vehicle	Private	Never	No	Occasionally	Occ	Non vegetarian	NV
560	0.052	0	Negative	Female	Contractual Staff	37		OS	O+	O	Positive	No	No	No	No	No	No	No	No		No	No	No	No	No	No	No	No	No	No	2	No	0	No	1	No	0	No	No;No;No;No;No;No;No;No;No	Asymptomatic	Auto	Public	Never	No	Never	No	Non vegetarian	NV
561	0.05	0	Negative	Male	Staff	48		S	B+	B	Positive	No	No	No	No	No	No	No	No		No	No	No	No	No	No	No	No	No	No	3	Yes	0	No	0	No	0	No	No;No;No;No;No;Yes;No;No;No	Symptomatic	Personal vehicle	Private	Never	No	Occasionally	Occ	Non vegetarian	NV
562	0.05	0	Negative	Male	Staff	51		S	O+	O	Positive	No	No	No	No	No	No	No	No		Yes	Yes	Yes	Yes	Yes	Yes	No	No	No	No	1	No	0	No	0	No	0	No	Yes;Yes;Yes;No;No;No;No;No;No	Symptomatic	Personal vehicle	Private	Never	No	Never	No	Non vegetarian	NV
563	0.052	0	Negative	Male	Staff	57		S	O+	O	Positive	No	No	No	No	No	No	No	No		No	No	No	No	No	No	No	No	No	No	0	No	0	No	0	No	0	No	No;No;No;No;No;No;No;No;No	Asymptomatic	Personal vehicle	Private	Never	No	Never	No	Occasionally non veg	NV
564	0.078	0	Negative	Male	Staff	29		S	A+	A	Positive	No	No	No	No	No	No	Yes	Yes	Negative	No	No	No	No	Yes	Yes		SU		SU	0	No	3	Yes	4	Yes	3	Yes	No;No;Yes;SU;SU;No;Yes;Yes;Yes	Symptomatic	Personal vehicle	Private	Never	No	Never	No	Vegetarian	V
565	0.052	0	Negative	Male	Staff	55		S	O+	O	Positive	Yes	Yes	No	No	No	No	No	No		No	No	No	No	No	No	No	No	No	No	0	No	0	No	0	No	0	No	No;No;No;No;No;No;No;No;No	Asymptomatic	Personal vehicle	Private	Never	No	Occasionally	Occ	Non vegetarian	NV
566	0.051	0	Negative	Male	Staff	57		S	AB+	AB	Positive	No	No	Yes	Yes	No	No	No	No		No	No	No	No	No	No	No	No	No	No	2	No	1	No	0	No	0	No	No;No;No;No;No;No;No;No;No	Asymptomatic	Personal vehicle	Private	Regular	Yes	Occasionally	Occ	Occasionally non veg	NV
567	0.051	0	Negative	Male	Staff	52		S	B+	B	Positive	Yes	Yes	No	No	No	No	No	No		No	No	No	No	No	No	No	No	No	No	0	No	0	No	0	No	0	No	No;No;No;No;No;No;No;No;No	Asymptomatic	Personal vehicle	Private	Never	No	Occasionally	Occ	Non vegetarian	NV
568	0.051	0	Negative	Male	Staff	54		S	B+	B	Positive	No	No	Yes	Yes	No	No	No	No		No	No	No	No	No	No	No	No	No	No	1	No	1	No	1	No	0	No	No;No;No;No;No;No;No;No;No	Asymptomatic	Personal vehicle	Private	Never	No	Never	No	Vegetarian	V
569	0.051	0	Negative	Male	Staff	50		S	O+	O	Positive	No	No	Yes	Yes	No	No	No	No		No	No	No	No	No	No	No	No	No	No	1	No	1	No	1	No	0	No	No;No;No;No;No;No;No;No;No	Asymptomatic	Personal vehicle	Private	Never	No	Occasionally	Occ	Occasionally non veg	NV
570	19.29	1	Positive	Male	Others	60		SU	B+	B	Positive	No	No	No	No	No	No	No	No		No	No	No	No	No	No	No	No	No	No	0	No	0	No	0	No	0	No	No;No;No;No;No;No;No;No;No	Asymptomatic	Auto	Public	Never	No	Never	No	Occasionally non veg	NV
571	82.35	1	Positive	Male	Staff	54		S	B+	B	Positive	No	No	Yes	Yes	No	No	No	No		No	No	No	No	No	No	No	No	No	No	1	No	1	No	0	No	1	No	No;No;No;No;No;No;No;No;No	Asymptomatic	Personal vehicle	Private	Never	No	Occasionally	Occ	Occasionally non veg	NV
572	0.049	0	Negative	Male	Staff	58		S	O+	O	Positive	Yes	Yes	Yes	Yes	No	No	No	No		No	No	No	No	No	No	No	No	No	No	0	No	0	No	0	No	0	No	No;No;No;No;No;No;No;No;No	Asymptomatic	Personal vehicle	Private	Never	No	Occasionally	Occ	Occasionally non veg	NV
573	0.053	0	Negative	Male	Staff	38		S	O+	O	Positive	No	No	No	No	No	No	No	No		No	No	No	No	No	No	No	No	No	No	1	No	1	No	1	No	0	No	No;No;No;No;No;No;No;No;No	Asymptomatic	Personal vehicle	Private	Sporadic	Yes	Occasionally	Occ	Vegetarian	V
574	0.051	0	Negative	Male	Staff	59		S	B+	B	Positive	Yes	Yes	No	No	No	No	No	No		No	No	No	No	No	No	No	No	No	No	0	No	0	No	0	No	0	No	No;No;No;No;No;No;No;No;No	Asymptomatic	Personal vehicle	Private	Never	No	Occasionally	Occ	Occasionally non veg	NV
575	0.052	0	Negative	Male	Others	30		SU	B+	B	Positive	No	No	No	No	No	No	No	No		No	No	No	No	No	No	No	No	No	No	1	No	0	No	0	No	0	No	No;No;No;No;No;No;No;No;No	Asymptomatic	Personal vehicle	Private	Never	No	Occasionally	Occ	Occasionally non veg	NV
576	0.057	0	Negative	Male	Staff	59		S	O+	O	Positive	No	No	No	No	No	No	No	No		No	No	No	No	No	No	No	No	No	No	0	No	0	No	0	No	0	No	No;No;No;No;No;No;No;No;No	Asymptomatic	Personal vehicle	Private	Never	No	Never	No	Non vegetarian	NV
577	1.85	1	Positive	Male	Staff	55		S	A+	A	Positive	Yes	Yes	No	No	No	No	No	No		No	No	No	No	No	No	No	No	No	No	0	No	2	No	0	No	0	No	No;No;No;No;No;No;No;No;No	Asymptomatic	Personal vehicle	Private	Never	No	Occasionally	Occ	Non vegetarian	NV
578	0.053	0	Negative	Male	Staff	31		S	O+	O	Positive	No	No	No	No	No	No	No	No		No	No	No	No	No	No	No	No	No	No	0	No	0	No	0	No	0	No	No;No;No;No;No;No;No;No;No	Asymptomatic	Personal vehicle	Private	Never	No	Never	No	Occasionally non veg	NV
579	0.053	0	Negative	Male	Staff	47		S	AB+	AB	Positive	No	No	No	No	No	No	No	No		No	No	No	No	No	No	No	No	No	No	0	No	0	No	0	No	0	No	No;No;No;No;No;No;No;No;No	Asymptomatic	Personal vehicle	Private	Never	No	Occasionally	Occ	Non vegetarian	NV
580	0.053	0	Negative	Male	Staff	55		S	O+	O	Positive	No	No	No	No	No	No	No	No		No	No	No	No	No	No	No	No	No	No	3	Yes	0	No	0	No	0	No	No;No;No;No;No;Yes;No;No;No	Symptomatic	Personal vehicle	Private	Never	No	Never	No	Vegetarian	V
581	0.055	0	Negative	Male	Faculty	46		S	B+	B	Positive	No	No	No	No	No	No	No	No		No	No	No	No	No	No	No	No	No	No	0	No	0	No	0	No	0	No	No;No;No;No;No;No;No;No;No	Asymptomatic	Personal vehicle	Private	Never	No	Occasionally	Occ	Vegetarian	V
582	0.052	0	Negative	Female	Student	27		S	B+	B	Positive	No	No	No	No	No	No	No	No		No	No	No	No	No	No	No	No	No	No	1	No	3	Yes	3	Yes	0	No	No;No;No;No;No;No;Yes;Yes;No	Symptomatic	Personal vehicle	Private	Never	No	Occasionally	Occ	Occasionally non veg	NV
583	0.055	0	Negative	Male	Student	30		S	A+	A	Positive	No	No	No	No	No	No	Yes	Yes	Negative	No	No	No	No	No	No	No	No	No	No	0	No	0	No	0	No	0	No	No;No;No;No;No;No;No;No;No	Asymptomatic	Personal vehicle	Private	Sporadic	Yes	Occasionally	Occ	Non vegetarian	NV
584	0.053	0	Negative	Male	Staff	55		S	B+	B	Positive	No	No	No	No	No	No	No	No		No	No	No	No	No	No	No	No	No	No	0	No	0	No	0	No	0	No	No;No;No;No;No;No;No;No;No	Asymptomatic	Personal vehicle	Private	Never	No	Occasionally	Occ	Occasionally non veg	NV
585	42.67	1	Positive	Female	Contractual Staff	47		OS		SU	SU	No	No	No	No	No	No	No	No		No	No	No	No	No	No	No	No	No	No	0	No	0	No	0	No	0	No	No;No;No;No;No;No;No;No;No	Asymptomatic	Personal vehicle	Private	Never	No	Never	No	Non vegetarian	NV
586	86.66	1	Positive	Male	Contractual Staff	46		OS		SU	SU	No	No	No	No	No	No	No	No		No	No	No	No	No	No	No	No	No	No	0	No	0	No	0	No	0	No	No;No;No;No;No;No;No;No;No	Asymptomatic	Public transport	Public	Never	No	Never	No	Non vegetarian	NV
587	0.053	0	Negative	Male	Contractual Staff	48		OS		SU	SU	No	No	No	No	No	No	No	No		No	No	No	No	No	No	No	No	No	No	0	No	0	No	0	No	0	No	No;No;No;No;No;No;No;No;No	Asymptomatic	Personal vehicle	Private	Never	No	Occasionally	Occ	Non vegetarian	NV
588	32.92	1	Positive	Male	Staff	36		S	B+	B	Positive	No	No	No	No	No	No	No	No		Yes	Yes	No	No	No	No	No	No	No	No	2	No	0	No	0	No	0	No	Yes;No;No;No;No;No;No;No;No	Symptomatic	Personal vehicle	Private	Never	No	Often	Yes	Non vegetarian	NV
589	0.053	0	Negative	Male	Staff	34		S	B+	B	Positive	No	No	No	No	No	No	No	No		No	No	No	No	No	No	No	No	No	No	2	No	4	Yes	0	No	0	No	No;No;No;No;No;No;Yes;No;No	Symptomatic	Personal vehicle	Private	Never	No	Occasionally	Occ	Occasionally non veg	NV
590	26.09	1	Positive	Male	Faculty	33		S	B+	B	Positive	No	No	Yes	Yes	No	No	Yes	Yes	Positive	No	No	No	No	Yes	Yes	No	No	No	No	5	Yes	3	Yes	0	No	0	No	No;No;Yes;No;No;Yes;Yes;No;No	Symptomatic	Personal vehicle	Private	Sporadic	Yes	Occasionally	Occ	Vegetarian	V
591	0.057	0	Negative	Female	Contractual Staff	37		OS	B+	B	Positive	No	No	No	No	No	No	No	No		No	No	No	No	No	No	No	No	No	No	0	No	0	No	0	No	0	No	No;No;No;No;No;No;No;No;No	Asymptomatic	Personal vehicle	Private	Never	No	Never	No	Non vegetarian	NV
592	0.059	0	Negative	Female	Staff	38		S	B+	B	Positive	No	No	No	No	No	No	No	No		No	No	No	No	No	No	No	No	No	No	0	No	0	No	0	No	0	No	No;No;No;No;No;No;No;No;No	Asymptomatic	Personal vehicle	Private	Never	No	Never	No	Non vegetarian	NV
593	0.057	0	Negative	Male	Staff	51		S	B+	B	Positive	Yes	Yes	Yes	Yes	No	No	No	No		No	No	No	No	No	No	No	No	No	No	1	No	1	No	1	No	1	No	No;No;No;No;No;No;No;No;No	Asymptomatic	Personal vehicle	Private	Never	No	Occasionally	Occ	Vegetarian	V
594	0.065	0	Negative	Male	Contractual Staff	33		OS	AB+	AB	Positive	No	No	No	No	No	No	No	No		No	No	No	No	No	No	No	No	No	No	0	No	0	No	0	No	0	No	No;No;No;No;No;No;No;No;No	Asymptomatic	Personal vehicle	Private	Never	No	Never	No	Non vegetarian	NV
595	0.065	0	Negative	Male	Contractual Staff	47		OS	A+	A	Positive	No	No	No	No	No	No	No	No		No	No	No	No	No	No	No	No	No	No	0	No	0	No	0	No	0	No	No;No;No;No;No;No;No;No;No	Asymptomatic	Personal vehicle	Private	Never	No	Never	No	Occasionally non veg	NV
596	0.07	0	Negative	Male	Contractual Staff	44		OS	B+	B	Positive	No	No	No	No	No	No	No	No		No	No	No	No	No	No	No	No	No	No	0	No	0	No	0	No	0	No	No;No;No;No;No;No;No;No;No	Asymptomatic	Personal vehicle	Private	Never	No	Never	No	Non vegetarian	NV
597	0.067	0	Negative	Male	Contractual Staff	48		OS		SU	SU	No	No	No	No	No	No	No	No		No	No	No	No	No	No	No	No	No	No	0	No	0	No	0	No	0	No	No;No;No;No;No;No;No;No;No	Asymptomatic	Personal vehicle	Private	Never	No	Never	No	Non vegetarian	NV
598	0.07	0	Negative	Male	Contractual Staff	55		OS	B+	B	Positive	No	No	No	No	No	No	No	No		No	No	No	No	No	No	No	No	No	No	0	No	0	No	0	No	0	No	No;No;No;No;No;No;No;No;No	Asymptomatic	Personal vehicle	Private	Never	No	Never	No	Occasionally non veg	NV
599	114.1	1	Positive	Male	Contractual Staff	42		OS	B+	B	Positive	No	No	No	No	No	No	No	No		No	No	No	No	No	No	No	No	No	No	0	No	0	No	0	No	0	No	No;No;No;No;No;No;No;No;No	Asymptomatic	Personal vehicle	Private	Never	No	Never	No	Non vegetarian	NV
600	0.07	0	Negative	Male	Contractual Staff	48		OS	B+	B	Positive	No	No	No	No	No	No	No	No		No	No	No	No	No	No	No	No	No	No	0	No	0	No	0	No	0	No	No;No;No;No;No;No;No;No;No	Asymptomatic	Personal vehicle	Private	Never	No	Never	No	Non vegetarian	NV
601	0.062	0	Negative	Male	Contractual Staff	34		OS	B+	B	Positive	No	No	No	No	No	No	No	No		No	No	No	No	No	No	No	No	No	No	0	No	0	No	0	No	0	No	No;No;No;No;No;No;No;No;No	Asymptomatic	Personal vehicle	Private	Never	No	Never	No	Non vegetarian	NV
602	0.069	0	Negative	Male	Contractual Staff	48		OS	A+	A	Positive	Yes	Yes	No	No	No	No	No	No		No	No	No	No	No	No	No	No	No	No	0	No	0	No	0	No	0	No	No;No;No;No;No;No;No;No;No	Asymptomatic	Public transport	Public	Sporadic	Yes	Occasionally	Occ	Non vegetarian	NV
603	0.07	0	Negative	Male	Contractual Staff	50		OS		SU	SU	No	No	No	No	No	No	No	No		No	No	No	No	No	No	No	No	No	No	0	No	0	No	0	No	0	No	No;No;No;No;No;No;No;No;No	Asymptomatic	Personal vehicle	Private	Never	No	Never	No	Non vegetarian	NV
604	0.068	0	Negative	Male	Contractual Staff	36		OS	B+	B	Positive	No	No	No	No	No	No	No	No		No	No	No	No	No	No	No	No	No	No	0	No	0	No	0	No	0	No	No;No;No;No;No;No;No;No;No	Asymptomatic	Personal vehicle	Private	Never	No	Never	No	Non vegetarian	NV
605	0.073	0	Negative	Male	Contractual Staff	51		OS	B+	B	Positive	No	No	No	No	No	No	No	No		No	No	No	No	No	No	No	No	No	No	0	No	0	No	0	No	0	No	No;No;No;No;No;No;No;No;No	Asymptomatic	Personal vehicle	Private	Regular	Yes	Never	No	Vegetarian	V
606	0.079	0	Negative	Male	Contractual Staff	33		OS	B+	B	Positive	No	No	No	No	No	No	No	No		No	No	No	No	No	No	No	No	No	No	0	No	0	No	0	No	0	No	No;No;No;No;No;No;No;No;No	Asymptomatic	Personal vehicle	Private	Never	No	Never	No	Occasionally non veg	NV
607	3.63	1	Positive	Male	Contractual Staff	47		OS	B+	B	Positive	No	No	No	No	No	No	No	No		No	No	No	No	No	No	No	No	No	No	0	No	0	No	0	No	0	No	No;No;No;No;No;No;No;No;No	Asymptomatic	Personal vehicle	Private	Never	No	Occasionally	Occ	Non vegetarian	NV
608	0.07	0	Negative	Male	Contractual Staff	45		OS		SU	SU	No	No	No	No	No	No	No	No		No	No	No	No	No	No	No	No	No	No	0	No	0	No	0	No	0	No	No;No;No;No;No;No;No;No;No	Asymptomatic	Personal vehicle	Private	Never	No	Never	No	Non vegetarian	NV
609	1.12	1	Positive	Male	Contractual Staff	50		OS	A+	A	Positive	Yes	Yes	No	No	No	No	No	No		No	No	No	No	No	No	No	No	No	No	0	No	0	No	0	No	0	No	No;No;No;No;No;No;No;No;No	Asymptomatic	Personal vehicle	Private	Never	No	Never	No	Occasionally non veg	NV
610	7.89	1	Positive	Male	Contractual Staff	39		OS	O+	O	Positive	No	No	No	No	No	No	No	No		No	No	No	No	No	No	No	No	No	No	0	No	0	No	0	No	0	No	No;No;No;No;No;No;No;No;No	Asymptomatic	Personal vehicle	Private	Never	No	Never	No	Non vegetarian	NV
611	0.07	0	Negative	Male	Contractual Staff	47		OS		SU	SU	No	No	No	No	No	No	No	No		No	No	No	No	No	No	No	No	No	No	0	No	0	No	0	No	0	No	No;No;No;No;No;No;No;No;No	Asymptomatic	Personal vehicle	Private	Never	No	Never	No	Non vegetarian	NV
612	0.069	0	Negative	Male	Contractual Staff	53		OS	B-	B	Negative	Yes	Yes	No	No	No	No	No	No		No	No	No	No	No	No	No	No	No	No	0	No	0	No	0	No	0	No	No;No;No;No;No;No;No;No;No	Asymptomatic	Personal vehicle	Private	Never	No	Occasionally	Occ	Occasionally non veg	NV
613	11.56	1	Positive	Male	Contractual Staff	54		OS	O+	O	Positive	No	No	No	No	No	No	No	No		No	No	No	No	No	No	No	No	No	No	0	No	0	No	0	No	0	No	No;No;No;No;No;No;No;No;No	Asymptomatic	Personal vehicle	Private	Regular	Yes	Never	No	Non vegetarian	NV
614	0.068	0	Negative	Male	Contractual Staff	40		OS	A+	A	Positive	No	No	No	No	No	No	No	No		No	No	No	No	No	No	No	No	No	No	0	No	0	No	0	No	0	No	No;No;No;No;No;No;No;No;No	Asymptomatic	Personal vehicle	Private	Sporadic	Yes	Occasionally	Occ	Non vegetarian	NV
615	0.067	0	Negative	Male	Contractual Staff	38		OS		SU	SU	No	No	No	No	No	No	No	No		No	No	No	No	No	No	No	No	No	No	0	No	0	No	0	No	0	No	No;No;No;No;No;No;No;No;No	Asymptomatic	Personal vehicle	Private	Never	No	Never	No	Non vegetarian	NV
616	0.078	0	Negative	Male	Contractual Staff	50		OS	AB-	AB	Negative	No	No	No	No	No	No	No	No		No	No	No	No	No	No	No	No	No	No	0	No	0	No	0	No	0	No	No;No;No;No;No;No;No;No;No	Asymptomatic	Personal vehicle	Private	Never	No	Never	No	Occasionally non veg	NV
617	0.068	0	Negative	Male	Contractual Staff	46		OS	O+	O	Positive	No	No	No	No	No	No	No	No		No	No	No	No	No	No	No	No	No	No	0	No	0	No	0	No	0	No	No;No;No;No;No;No;No;No;No	Asymptomatic	Personal vehicle	Private	Never	No	Never	No	Non vegetarian	NV
618	4.77	1	Positive	Male	Contractual Staff	33		OS	B+	B	Positive	No	No	No	No	No	No	No	No		No	No	No	No	No	No	No	No	No	No	0	No	0	No	0	No	0	No	No;No;No;No;No;No;No;No;No	Asymptomatic	Personal vehicle	Private	Never	No	Never	No	Occasionally non veg	NV
619	0.065	0	Negative	Male	Contractual Staff	48		OS		SU	SU	No	No	No	No	No	No	No	No		No	No	No	No	No	No	No	No	No	No	0	No	0	No	0	No	0	No	No;No;No;No;No;No;No;No;No	Asymptomatic	Personal vehicle	Private	Never	No	Never	No	Non vegetarian	NV
620	0.07	0	Negative	Male	Contractual Staff	37		OS	AB+	AB	Positive	No	No	No	No	No	No	No	No		No	No	No	No	No	No	No	No	No	No	0	No	0	No	0	No	0	No	No;No;No;No;No;No;No;No;No	Asymptomatic	Personal vehicle	Private	Never	No	Never	No	Non vegetarian	NV
621	26.26	1	Positive	Female	Contractual Staff	44		OS	B+	B	Positive	No	No	No	No	No	No	No	No		No	No	No	No	No	No	No	No	No	No	0	No	0	No	0	No	0	No	No;No;No;No;No;No;No;No;No	Asymptomatic	Personal vehicle	Private	Never	No	Never	No	Non vegetarian	NV
622	0.074	0	Negative	Male	Others	48		SU	A+	A	Positive	No	No	No	No	No	No	No	No		No	No	No	No	No	No	No	No	No	No	0	No	0	No	0	No	0	No	No;No;No;No;No;No;No;No;No	Asymptomatic	Personal vehicle	Private	Never	No	Never	No	Vegetarian	V
623	0.069	0	Negative	Male	Contractual Staff	47		OS		SU	SU	No	No	No	No	No	No	No	No		No	No	No	No	No	No	No	No	No	No	0	No	0	No	0	No	0	No	No;No;No;No;No;No;No;No;No	Asymptomatic	Personal vehicle	Private	Never	No	Never	No	Non vegetarian	NV
624	0.067	0	Negative	Male	Contractual Staff	58		OS	B+	B	Positive	No	No	No	No	No	No	No	No		No	No	No	No	No	No	No	No	No	No	0	No	0	No	0	No	0	No	No;No;No;No;No;No;No;No;No	Asymptomatic	Personal vehicle	Private	Never	No	Never	No	Occasionally non veg	NV
625	0.08	0	Negative	Male	Contractual Staff	48		OS	AB+	AB	Positive	No	No	No	No	No	No	No	No		No	No	No	No	No	No	No	No	No	No	0	No	0	No	0	No	0	No	No;No;No;No;No;No;No;No;No	Asymptomatic	Personal vehicle	Private	Never	No	Never	No	Occasionally non veg	NV
626	0.071	0	Negative	Male	Contractual Staff	48		OS		SU	SU	No	No	No	No	No	No	No	No		No	No	No	No	No	No	No	No	No	No	0	No	0	No	0	No	0	No	No;No;No;No;No;No;No;No;No	Asymptomatic	Personal vehicle	Private	Never	No	Never	No	Non vegetarian	NV
627	0.066	0	Negative	Male	Contractual Staff	52		OS	B+	B	Positive	No	No	No	No	No	No	No	No		No	No	No	No	No	No	No	No	No	No	0	No	0	No	0	No	0	No	No;No;No;No;No;No;No;No;No	Asymptomatic	Personal vehicle	Private	Never	No	Never	No	Vegetarian	V
628	16.68	1	Positive	Male	Contractual Staff	55		OS	O+	O	Positive	Yes	Yes	No	No	No	No	No	No		No	No	No	No	No	No	No	No	No	No	0	No	0	No	0	No	0	No	No;No;No;No;No;No;No;No;No	Asymptomatic	Personal vehicle	Private	Sporadic	Yes	Never	No	Occasionally non veg	NV
629	69.86	1	Positive	Male	Contractual Staff	44		OS	B+	B	Positive	Yes	Yes	No	No	No	No	No	No		No	No	No	No	No	No	No	No	No	No	0	No	0	No	0	No	0	No	No;No;No;No;No;No;No;No;No	Asymptomatic	Personal vehicle	Private	Never	No	Never	No	Non vegetarian	NV
630	0.072	0	Negative	Male	Contractual Staff	48		OS	B-	B	Negative	Yes	Yes	No	No	No	No	No	No		No	No	No	No	No	No	No	No	No	No	0	No	0	No	0	No	0	No	No;No;No;No;No;No;No;No;No	Asymptomatic	Personal vehicle	Private	Regular	Yes	Never	No	Occasionally non veg	NV
631	0.066	0	Negative	Male	Contractual Staff	58		OS	O+	O	Positive	No	No	No	No	No	No	No	No		No	No	No	No	No	No	No	No	No	No	0	No	0	No	0	No	0	No	No;No;No;No;No;No;No;No;No	Asymptomatic	Personal vehicle	Private	Never	No	Never	No	Occasionally non veg	NV
632	0.071	0	Negative	Male	Contractual Staff	54		OS	B+	B	Positive	No	No	No	No	No	No	No	No		No	No	No	No	No	No	No	No	No	No	0	No	0	No	0	No	0	No	No;No;No;No;No;No;No;No;No	Asymptomatic	Personal vehicle	Private	Never	No	Never	No	Non vegetarian	NV
633	88.52	1	Positive	Male	Contractual Staff	33		OS	B+	B	Positive	No	No	No	No	No	No	No	No		No	No	No	No	No	No	No	No	No	No	0	No	0	No	0	No	0	No	No;No;No;No;No;No;No;No;No	Asymptomatic	Public transport	Public	Never	No	Never	No	Non vegetarian	NV
634	0.071	0	Negative	Female	Others	50		SU	A+	A	Positive	No	No	No	No	No	No	No	No		No	No	No	No	No	No	No	No	No	No	1	No	0	No	0	No	0	No	No;No;No;No;No;No;No;No;No	Asymptomatic	Personal vehicle	Private	Never	No	Never	No	Vegetarian	V
635	0.072	0	Negative	Male	Student	21		S	O+	O	Positive	No	No	No	No	No	No	No	No		No	No	No	No	No	No	No	No	No	No	0	No	0	No	0	No	0	No	No;No;No;No;No;No;No;No;No	Asymptomatic	Personal vehicle	Private	Never	No	Never	No	Vegetarian	V
636	9.03	1	Positive	Female	Staff	55		S	A+	A	Positive	No	No	No	No	No	No	Yes	Yes	Negative	No	No	No	No	Yes	Yes	Yes	Yes	Yes	Yes	2	No	1	No	0	No	0	No	No;No;Yes;Yes;Yes;No;No;No;No	Symptomatic	Personal vehicle	Private	Never	No	Never	No	Non vegetarian	NV
637	9.18	1	Positive	Female	Faculty	46		S	A+	A	Positive	No	No	No	No	No	No	Yes	Yes	Positive	Yes	Yes	No	No	Yes	Yes	Yes	Yes	Yes	Yes	5	Yes	5	Yes	4	Yes	0	No	Yes;No;Yes;Yes;Yes;Yes;Yes;Yes;No	Symptomatic	Auto	Public	Never	No	Never	No	Occasionally non veg	NV
638	0.043	0	Negative	Male	Contractual Staff	47		OS		SU	SU	No	No	No	No	No	No	No	No		No	No	No	No	No	No	No	No	No	No	0	No	0	No	0	No	0	No	No;No;No;No;No;No;No;No;No	Asymptomatic	Public transport	Public	Never	No	Never	No	Non vegetarian	NV
639	0.044	0	Negative	Male	Contractual Staff	59		OS	B+	B	Positive	No	No	No	No	No	No	Yes	Yes	Negative	No	No	No	No	No	No	No	No	No	No	3	Yes	2	No	2	No	0	No	No;No;No;No;No;Yes;No;No;No	Symptomatic	Personal vehicle	Private	Never	No	Never	No	Non vegetarian	NV
640	0.574	0	Negative	Male	Staff	55		S	B+	B	Positive	Yes	Yes	Yes	Yes	No	No	No	No		No	No	No	No	No	No	No	No	No	No	0	No	0	No	0	No	0	No	No;No;No;No;No;No;No;No;No	Asymptomatic	Personal vehicle	Private	Sporadic	Yes	Occasionally	Occ	Vegetarian	V
641	34.38	1	Positive	Male	Staff	44		S		SU	SU	No	No	No	No	No	No	No	No		No	No	No	No	No	No	No	No	No	No	0	No	0	No	0	No	0	No	No;No;No;No;No;No;No;No;No	Asymptomatic	Personal vehicle	Private	Never	No	Never	No	Non vegetarian	NV
642	23.34	1	Positive	Male	Staff	43		S	A+	A	Positive	No	No	No	No	No	No	Yes	Yes	Positive	Yes	Yes	No	No	No	No	Yes	Yes	Yes	Yes	2	No	2	No	0	No	2	No	Yes;No;No;Yes;Yes;No;No;No;No	Symptomatic	Personal vehicle	Private	Never	No	Never	No	Non vegetarian	NV
643	40.31	1	Positive	Male	Staff	52		S	O+	O	Positive	No	No	Yes	Yes	No	No	Yes	Yes	Negative	No	No	No	No	No	No	No	No	No	No	0	No	0	No	0	No	0	No	No;No;No;No;No;No;No;No;No	Asymptomatic	Personal vehicle	Private	Never	No	Never	No	Non vegetarian	NV
644	0.046	0	Negative	Male	Others	64		SU	B+	B	Positive	Yes	Yes	Yes	Yes	No	No	No	No		No	No	No	No	No	No	No	No	No	No	3	Yes	3	Yes	1	No	1	No	No;No;No;No;No;Yes;Yes;No;No	Symptomatic	Personal vehicle	Private	Sporadic	Yes	Occasionally	Occ	Non vegetarian	NV
645	20	1	Positive	Male	Contractual Staff	32		OS		SU	SU	No	No	No	No	No	No	No	No		No	No	No	No	No	No	No	No	No	No	0	No	0	No	0	No	0	No	No;No;No;No;No;No;No;No;No	Asymptomatic	Personal vehicle	Private	Never	No	Never	No	Non vegetarian	NV
646	0.044	0	Negative	Male	Staff	52		S	O+	O	Positive	No	No	Yes	Yes	No	No	No	No		No	No	No	No	No	No	No	No	No	No	0	No	0	No	0	No	0	No	No;No;No;No;No;No;No;No;No	Asymptomatic	Auto	Public	Never	No	Never	No	Non vegetarian	NV
647	0.046	0	Negative	Female	Contractual Staff	26		OS	A+	A	Positive	No	No	No	No	No	No	Yes	Yes	Negative	No	No	No	No	No	No	No	No	No	No	0	No	0	No	0	No	0	No	No;No;No;No;No;No;No;No;No	Asymptomatic	Personal vehicle	Private	Never	No	Never	No	Occasionally non veg	NV
648	0.053	0	Negative	Male	Staff	58		S		SU	SU	No	No	No	No	No	No	No	No		No	No	No	No	No	No	No	No	No	No	0	No	0	No	0	No	0	No	No;No;No;No;No;No;No;No;No	Asymptomatic	Personal vehicle	Private	Never	No	Occasionally	Occ	Non vegetarian	NV
649	3.71	1	Positive	Male	Staff	55		S	B+	B	Positive	No	No	Yes	Yes	No	No	No	No		No	No	No	No	No	No	No	No	No	No	0	No	0	No	0	No	0	No	No;No;No;No;No;No;No;No;No	Asymptomatic	Personal vehicle	Private	Never	No	Occasionally	Occ	Non vegetarian	NV
650	0.044	0	Negative	Male	Others	64		SU	O+	O	Positive	No	No	Yes	Yes	No	No	Yes	Yes	Negative	No	No	No	No	No	No	No	No	No	No	1	No	0	No	0	No	1	No	No;No;No;No;No;No;No;No;No	Asymptomatic	Personal vehicle	Private	Sporadic	Yes	Occasionally	Occ	Non vegetarian	NV
651	0.046	0	Negative	Female	Others	42		SU	O+	O	Positive	No	No	No	No	No	No	No	No		No	No	No	No	Yes	Yes	No	No	No	No	0	No	0	No	0	No	0	No	No;No;Yes;No;No;No;No;No;No	Symptomatic	Personal vehicle	Private	Never	No	Never	No	Occasionally non veg	NV
652	0.048	0	Negative	Male	Staff	27		S	A+	A	Positive	No	No	No	No	No	No	No	No		No	No	Yes	Yes	No	No	No	No	No	No	0	No	0	No	0	No	0	No	No;Yes;No;No;No;No;No;No;No	Symptomatic	Personal vehicle	Private	Sporadic	Yes	Never	No	Non vegetarian	NV
653	0.044	0	Negative	Female	Others	42		SU	O+	O	Positive	No	No	No	No	No	No	No	No		No	No	No	No	No	No	No	No	No	No	0	No	0	No	0	No	0	No	No;No;No;No;No;No;No;No;No	Asymptomatic	Personal vehicle	Private	Never	No	Never	No	Occasionally non veg	NV
654	0.044	0	Negative	Male	Staff	53		S		SU	SU	No	No	No	No	No	No	No	No		No	No	No	No	No	No	No	No	No	No	0	No	0	No	0	No	0	No	No;No;No;No;No;No;No;No;No	Asymptomatic	Personal vehicle	Private	Never	No	Never	No	Non vegetarian	NV
655	0.043	0	Negative	Female	Student	25		S	B+	B	Positive	No	No	No	No	No	No	No	No		No	No	No	No	No	No	No	No	No	No	3	Yes	4	Yes	4	Yes	4	Yes	No;No;No;No;No;Yes;Yes;Yes;Yes	Symptomatic	Personal vehicle	Private	Never	No	Never	No	Vegetarian	V
656	40.91	1	Positive	Female	Contractual Staff	43		OS		SU	SU	No	No	No	No	No	No	No	No		No	No	No	No	No	No	No	No	No	No	0	No	0	No	0	No	0	No	No;No;No;No;No;No;No;No;No	Asymptomatic	Personal vehicle	Private	Never	No	Never	No	Non vegetarian	NV
657	0.046	0	Negative	Female	Others	54		SU	B+	B	Positive	No	No	No	No	No	No	No	No		No	No	Yes	Yes	No	No	No	No	No	No	0	No	0	No	0	No	0	No	No;Yes;No;No;No;No;No;No;No	Symptomatic	Personal vehicle	Private	Never	No	Never	No	Occasionally non veg	NV
658	0.044	0	Negative	Male	Student	30		S		SU	SU	No	No	No	No	No	No	Yes	Yes	Negative	No	No	Yes	Yes	Yes	Yes	No	No	No	No	1	No	0	No	2	No	0	No	No;Yes;Yes;No;No;No;No;No;No	Symptomatic	Personal vehicle	Private	Never	No	Occasionally	Occ	Occasionally non veg	NV
659	0.048	0	Negative	Female	Staff	51		S	B+	B	Positive	No	No	No	No	No	No	No	No		No	No	No	No	No	No	No	No	No	No	0	No	0	No	0	No	0	No	No;No;No;No;No;No;No;No;No	Asymptomatic	Personal vehicle	Private	Never	No	Never	No	Occasionally non veg	NV
660	0.046	0	Negative	Female	Others	29		SU	B+	B	Positive	No	No	No	No	No	No	No	No		No	No	No	No	No	No	No	No	No	No	0	No	0	No	0	No	0	No	No;No;No;No;No;No;No;No;No	Asymptomatic	Personal vehicle	Private	Never	No	Never	No	Non vegetarian	NV
661	0.048	0	Negative	Female	Staff	59		S	A+	A	Positive	No	No	No	No	No	No	No	No		No	No	No	No	No	No	No	No	No	No	3	Yes	0	No	0	No	0	No	No;No;No;No;No;Yes;No;No;No	Symptomatic	Personal vehicle	Private	Never	No	Never	No	Non vegetarian	NV
662	0.044	0	Negative	Female	Student	24		S	A+	A	Positive	No	No	No	No	No	No	Yes	Yes	Negative	No	No	No	No	No	No	No	No	No	No	3	Yes	2	No	1	No	0	No	No;No;No;No;No;Yes;No;No;No	Symptomatic	Personal vehicle	Private	Never	No	Never	No	Non vegetarian	NV
663	0.045	0	Negative	Female	Staff	46		S	O+	O	Positive	No	No	No	No	No	No	No	No		No	No	No	No	No	No	No	No	No	No	0	No	0	No	0	No	0	No	No;No;No;No;No;No;No;No;No	Asymptomatic	Auto	Public	Never	No	Never	No	Vegetarian	V
664	0.045	0	Negative	Male	Staff	55		S		SU	SU	No	No	No	No	No	No	No	No		No	No	No	No	No	No	No	No	No	No	0	No	0	No	0	No	0	No	No;No;No;No;No;No;No;No;No	Asymptomatic	Personal vehicle	Private	Never	No	Never	No	Non vegetarian	NV
665	7.54	1	Positive	Male	Staff	50		S		SU	SU	No	No	No	No	No	No	No	No		No	No	No	No	No	No	No	No	No	No	0	No	0	No	0	No	0	No	No;No;No;No;No;No;No;No;No	Asymptomatic	Personal vehicle	Private	Never	No	Never	No	Non vegetarian	NV
666	0.05	0	Negative	Male	Staff	28		S	O+	O	Positive	No	No	No	No	No	No	No	No		No	No	No	No	No	No	No	No	No	No	1	No	3	Yes	1	No	2	No	No;No;No;No;No;No;Yes;No;No	Symptomatic	Personal vehicle	Private	Never	No	Never	No	Vegetarian	V
667	0.045	0	Negative	Male	Staff	48		S		SU	SU	No	No	No	No	No	No	No	No		No	No	No	No	No	No	No	No	No	No	0	No	0	No	0	No	0	No	No;No;No;No;No;No;No;No;No	Asymptomatic	Personal vehicle	Private	Never	No	Never	No	Non vegetarian	NV
668	0.045	0	Negative	Male	Staff	50		S		SU	SU	No	No	No	No	No	No	No	No		No	No	No	No	No	No	No	No	No	No	0	No	0	No	0	No	0	No	No;No;No;No;No;No;No;No;No	Asymptomatic	Personal vehicle	Private	Never	No	Never	No	Non vegetarian	NV
669	0.048	0	Negative	Female	Others	41		SU	O+	O	Positive	No	No	Yes	Yes	No	No	No	No		No	No	No	No	No	No	No	No	No	No	2	No	2	No	1	No	0	No	No;No;No;No;No;No;No;No;No	Asymptomatic	Cab	Public	Never	No	Never	No	Occasionally non veg	NV
670	0.044	0	Negative	Male	Staff	58		S	B+	B	Positive	Yes	Yes	No	No	No	No	No	No		No	No	No	No	No	No	No	No	No	No	0	No	0	No	0	No	0	No	No;No;No;No;No;No;No;No;No	Asymptomatic	Personal vehicle	Private	Sporadic	Yes	Occasionally	Occ	Non vegetarian	NV
671	40.75	1	Positive	Male	Student	23		S	O+	O	Positive	No	No	No	No	No	No	Yes	Yes	Positive	Yes	Yes	Yes	Yes	No	No	Yes	Yes	Yes	Yes	3	Yes	4	Yes	4	Yes	0	No	Yes;Yes;No;Yes;Yes;Yes;Yes;Yes;No	Symptomatic	Cab	Public	Never	No	Never	No	Non vegetarian	NV
672	0.046	0	Negative	Male	Staff	34		S	O+	O	Positive	No	No	No	No	No	No	No	No		No	No	No	No	No	No	No	No	No	No	1	No	0	No	0	No	0	No	No;No;No;No;No;No;No;No;No	Asymptomatic	Personal vehicle	Private	Never	No	Occasionally	Occ	Occasionally non veg	NV
673	0.807	0	Negative	Male	Contractual Staff	31		OS	O+	O	Positive	No	No	No	No	No	No	No	No		No	No	No	No	No	No	No	No	No	No	2	No	2	No	2	No	1	No	No;No;No;No;No;No;No;No;No	Asymptomatic	Personal vehicle	Private	Never	No	Never	No	Non vegetarian	NV
674	7.31	1	Positive	Male	Contractual Staff	50		OS		SU	SU	No	No	No	No	No	No	No	No		No	No	No	No	No	No	No	No	No	No	0	No	0	No	0	No	0	No	No;No;No;No;No;No;No;No;No	Asymptomatic	Personal vehicle	Private	Never	No	Never	No	Non vegetarian	NV
675	0.045	0	Negative	Male	Staff	57		S	AB+	AB	Positive	Yes	Yes	No	No	Yes	Yes	No	No		No	No	No	No	No	No	No	No	No	No	0	No	1	No	1	No	0	No	No;No;No;No;No;No;No;No;No	Asymptomatic	Personal vehicle	Private	Never	No	Never	No	Occasionally non veg	NV
676	47.21	1	Positive	Female	Others	50		SU	B+	B	Positive	No	No	No	No	No	No	No	No		No	No	No	No	No	No	No	No	No	No	1	No	1	No	1	No	0	No	No;No;No;No;No;No;No;No;No	Asymptomatic	Personal vehicle	Private	Never	No	Never	No	Vegetarian	V
677	31.63	1	Positive	Male	Staff	48		S	B-	B	Negative	Yes	Yes	No	No	No	No	No	No		Yes	Yes	No	No	No	No	No	No	No	No	3	Yes	4	Yes	4	Yes	0	No	Yes;No;No;No;No;Yes;Yes;Yes;No	Symptomatic	Personal vehicle	Private	Never	No	Often	Yes	Non vegetarian	NV
678	0.427	0	Negative	Male	Staff	42		S	O+	O	Positive	No	No	No	No	No	No	No	No		No	No	No	No	Yes	Yes	No	No	No	No	1	No	3	Yes	1	No	0	No	No;No;Yes;No;No;No;Yes;No;No	Symptomatic	Personal vehicle	Private	Never	No	Occasionally	Occ	Occasionally non veg	NV
679	20.29	1	Positive	Male	Others	24		SU	B+	B	Positive	No	No	No	No	No	No	No	No		No	No	No	No	No	No	No	No	No	No	0	No	0	No	0	No	0	No	No;No;No;No;No;No;No;No;No	Asymptomatic	Personal vehicle	Private	Never	No	Never	No	Occasionally non veg	NV
680	49.78	1	Positive	Male	Staff	37		S	B+	B	Positive	No	No	No	No	No	No	Yes	Yes	Positive	Yes	Yes	No	No	No	No	No	No	No	No	5	Yes	2	No	2	No	3	Yes	Yes;No;No;No;No;Yes;No;No;Yes	Symptomatic	Personal vehicle	Private	Never	No	Occasionally	Occ	Non vegetarian	NV
681	0.049	0	Negative	Female	Student	27		S	B+	B	Positive	No	No	No	No	No	No	No	No		No	No	No	No	No	No	No	No	No	No	1	No	2	No	2	No	0	No	No;No;No;No;No;No;No;No;No	Asymptomatic	Personal vehicle	Private	Never	No	Never	No	Vegetarian	V
682	0.048	0	Negative	Female	Staff	55		S	B+	B	Positive	No	No	No	No	No	No	No	No		No	No	No	No	No	No	No	No	No	No	0	No	0	No	0	No	0	No	No;No;No;No;No;No;No;No;No	Asymptomatic	Personal vehicle	Private	Never	No	Never	No	Non vegetarian	NV
683	0.051	0	Negative	Male	Staff	35		S	B+	B	Positive	No	No	No	No	No	No	No	No		No	No	No	No	No	No	No	No	No	No	0	No	0	No	0	No	0	No	No;No;No;No;No;No;No;No;No	Asymptomatic	Personal vehicle	Private	Never	No	Never	No	Non vegetarian	NV
684	0.046	0	Negative	Male	Others	25		SU	O+	O	Positive	No	No	No	No	No	No	No	No		No	No	No	No	No	No	No	No	No	No	0	No	0	No	0	No	0	No	No;No;No;No;No;No;No;No;No	Asymptomatic	Personal vehicle	Private	Sporadic	Yes	Never	No	Non vegetarian	NV
685	0.047	0	Negative	Male	Staff	45		S		SU	SU	No	No	No	No	No	No	No	No		No	No	No	No	No	No	No	No	No	No	0	No	0	No	0	No	0	No	No;No;No;No;No;No;No;No;No	Asymptomatic	Personal vehicle	Private	Never	No	Never	No	Non vegetarian	NV
686	0.049	0	Negative	Male	Contractual Staff	31		OS		SU	SU	No	No	No	No	No	No	No	No		No	No	No	No	No	No	No	No	No	No	0	No	0	No	0	No	0	No	No;No;No;No;No;No;No;No;No	Asymptomatic	Personal vehicle	Private	Never	No	Occasionally	Occ	Non vegetarian	NV
687	0.045	0	Negative	Male	Staff	44		S		SU	SU	No	No	No	No	No	No	No	No		No	No	No	No	No	No	No	No	No	No	0	No	0	No	0	No	0	No	No;No;No;No;No;No;No;No;No	Asymptomatic	Personal vehicle	Private	Never	No	Never	No	Non vegetarian	NV
688	13.45	1	Positive	Male	Staff	59		S	B+	B	Positive	No	No	No	No	No	No	No	No		No	No	No	No	No	No	No	No	No	No	0	No	0	No	0	No	0	No	No;No;No;No;No;No;No;No;No	Asymptomatic	Personal vehicle	Private	Never	No	Occasionally	Occ	Non vegetarian	NV
689	32.86	1	Positive	Female	Staff	43		S		SU	SU	No	No	No	No	No	No	No	No		No	No	No	No	No	No	No	No	No	No	0	No	0	No	0	No	0	No	No;No;No;No;No;No;No;No;No	Asymptomatic	Personal vehicle	Private	Never	No	Never	No	Vegetarian	V
690	0.053	0	Negative	Male	Contractual Staff	26		OS		SU	SU	No	No	No	No	No	No	No	No		No	No	No	No	No	No	No	No	No	No	0	No	0	No	0	No	1	No	No;No;No;No;No;No;No;No;No	Asymptomatic	Personal vehicle	Private	Sporadic	Yes	Occasionally	Occ	Non vegetarian	NV
691	91.02	1	Positive	Male	Staff	30		S		SU	SU	No	No	No	No	No	No	No	No		No	No	No	No	No	No	No	No	No	No	0	No	0	No	0	No	0	No	No;No;No;No;No;No;No;No;No	Asymptomatic	Personal vehicle	Private	Never	No	Never	No	Occasionally non veg	NV
692	0.053	0	Negative	Male	Student	32		S		SU	SU	Yes	Yes	No	No	No	No	No	No		No	No	No	No	No	No	No	No	No	No	0	No	0	No	0	No	0	No	No;No;No;No;No;No;No;No;No	Asymptomatic	Personal vehicle	Private	Never	No	Never	No	Non vegetarian	NV
693	0.044	0	Negative	Male	Staff	42		S		SU	SU	No	No	No	No	No	No	No	No		No	No	No	No	No	No	No	No	No	No	0	No	0	No	0	No	0	No	No;No;No;No;No;No;No;No;No	Asymptomatic	Public transport	Public	Never	No	Never	No	Non vegetarian	NV
694	50.25	1	Positive	Male	Contractual Staff	43		OS	B+	B	Positive	No	No	No	No	No	No	No	No		No	No	No	No	No	No	No	No	No	No	0	No	0	No	0	No	0	No	No;No;No;No;No;No;No;No;No	Asymptomatic	Personal vehicle	Private	Never	No	Occasionally	Occ	Non vegetarian	NV
695	0.047	0	Negative	Female	Contractual Staff	38		OS		SU	SU	No	No	No	No	No	No	No	No		No	No	No	No	No	No	No	No	No	No	0	No	0	No	0	No	0	No	No;No;No;No;No;No;No;No;No	Asymptomatic	Personal vehicle	Private	Never	No	Never	No	Non vegetarian	NV
696	63.64	1	Positive	Male	Contractual Staff	56		OS	O+	O	Positive	No	No	No	No	No	No	No	No		No	No	No	No	No	No	No	No	No	No	0	No	0	No	0	No	0	No	No;No;No;No;No;No;No;No;No	Asymptomatic	Personal vehicle	Private	Never	No	Never	No	Non vegetarian	NV
697	0.045	0	Negative	Male	Staff	45		S		SU	SU	No	No	No	No	No	No	No	No		No	No	No	No	No	No	No	No	No	No	0	No	0	No	0	No	0	No	No;No;No;No;No;No;No;No;No	Asymptomatic	Personal vehicle	Private	Never	No	Never	No	Non vegetarian	NV
698	0.047	0	Negative	Male	Staff	33		S	B+	B	Positive	No	No	No	No	No	No	No	No		No	No	No	No	No	No	No	No	No	No	0	No	0	No	0	No	0	No	No;No;No;No;No;No;No;No;No	Asymptomatic	Personal vehicle	Private	Never	No	Never	No	Vegetarian	V
699	0.045	0	Negative	Female	Staff	31		S	B+	B	Positive	No	No	No	No	No	No	No	No		No	No	No	No	No	No	No	No	No	No	0	No	0	No	0	No	0	No	No;No;No;No;No;No;No;No;No	Asymptomatic	Personal vehicle	Private	Never	No	Never	No	Non vegetarian	NV
700	0.046	0	Negative	Male	Others	61		SU	AB-	AB	Negative	No	No	Yes	Yes	No	No	No	No		No	No	No	No	No	No	No	No	No	No	0	No	0	No	0	No	0	No	No;No;No;No;No;No;No;No;No	Asymptomatic	Personal vehicle	Private	Never	No	Occasionally	Occ	Non vegetarian	NV
701	81.67	1	Positive	Male	Contractual Staff	36		OS	O+	O	Positive	No	No	No	No	No	No	No	No		No	No	No	No	No	No	No	No	No	No	0	No	0	No	0	No	0	No	No;No;No;No;No;No;No;No;No	Asymptomatic	Personal vehicle	Private	Never	No	Never	No	Vegetarian	V
702	0.365	0	Negative	Female	Staff	55		S	B+	B	Positive	Yes	Yes	No	No	No	No	No	No		No	No	No	No	No	No	No	No	No	No	0	No	0	No	0	No	0	No	No;No;No;No;No;No;No;No;No	Asymptomatic	Personal vehicle	Private	Never	No	Never	No	Non vegetarian	NV
703	64.91	1	Positive	Male	Staff	54		S	B+	B	Positive	No	No	No	No	No	No	No	No		No	No	No	No	No	No	No	No	No	No	2	No	2	No	0	No	0	No	No;No;No;No;No;No;No;No;No	Asymptomatic	Personal vehicle	Private	Never	No	Never	No	Non vegetarian	NV
704	0.048	0	Negative	Female	Staff	56		S	O+	O	Positive	No	No	No	No	No	No	Yes	Yes	Negative	No	No	No	No	No	No	No	No	No	No	1	No	1	No	0	No	0	No	No;No;No;No;No;No;No;No;No	Asymptomatic	Personal vehicle	Private	Never	No	Never	No	Vegetarian	V
705	0.047	0	Negative	Male	Staff	32		S	B+	B	Positive	No	No	No	No	No	No	No	No		No	No	No	No	No	No	No	No	No	No	2	No	0	No	0	No	2	No	No;No;No;No;No;No;No;No;No	Asymptomatic	Personal vehicle	Private	Never	No	Occasionally	Occ	Non vegetarian	NV
706	0.045	0	Negative	Male	Others	61		SU	O+	O	Positive	Yes	Yes	Yes	Yes	No	No	No	No		No	No	No	No	No	No	No	No	No	No	2	No	0	No	0	No	0	No	No;No;No;No;No;No;No;No;No	Asymptomatic	Personal vehicle	Private	Never	No	Occasionally	Occ	Non vegetarian	NV
707	0.05	0	Negative	Male	Staff	55		S	O+	O	Positive	No	No	No	No	No	No	No	No		No	No	No	No	No	No	No	No	No	No	0	No	0	No	0	No	0	No	No;No;No;No;No;No;No;No;No	Asymptomatic	Personal vehicle	Private	Never	No	Occasionally	Occ	Occasionally non veg	NV
708	0.056	0	Negative	Male	Staff	33		S	B+	B	Positive	No	No	No	No	No	No	No	No		No	No	No	No	No	No	No	No	No	No	0	No	0	No	0	No	0	No	No;No;No;No;No;No;No;No;No	Asymptomatic	Personal vehicle	Private	Never	No	Never	No	Non vegetarian	NV
709	86.77	1	Positive	Male	Contractual Staff	48		OS		SU	SU	No	No	No	No	No	No	No	No		No	No	No	No	No	No	No	No	No	No	0	No	0	No	0	No	0	No	No;No;No;No;No;No;No;No;No	Asymptomatic	Personal vehicle	Private	Never	No	Occasionally	Occ	Non vegetarian	NV
710	8.35	1	Positive	Female	Contractual Staff	45		OS		SU	SU	No	No	No	No	No	No	No	No		No	No	No	No	No	No	No	No	No	No	0	No	0	No	0	No	0	No	No;No;No;No;No;No;No;No;No	Asymptomatic	Personal vehicle	Private	Never	No	Never	No	Vegetarian	V
711	0.064	0	Negative	Male	Faculty	53	Govt. Service	S	O+	O	Positive	No	No	Yes	Yes	No	No	Yes	Yes	Negative	No	No	No	No	No	No	No	No	No	No	0	No	0	No	0	No	0	No	No;No;No;No;No;No;No;No;No	Asymptomatic	Personal vehicle	Private	Never	No	Never	No	Non vegetarian	NV
712	0.063	0	Negative	Male	Faculty	42	Scientist	S	B+	B	Positive	No	No	No	No	No	No	No	No		No	No	No	No	No	No	No	No	No	No	1	No	1	No	0	No	0	No	No;No;No;No;No;No;No;No;No	Asymptomatic	Personal vehicle	Private	Never	No	Never	No	Vegetarian	V
713	0.084	0	Negative	Female	Student	33	Research	S		SU	SU	No	No	No	No	No	No	Yes	Yes	Negative	No	No	No	No	No	No		SU		SU	2	No	2	No	2	No	0	No	No;No;No;SU;SU;No;No;No;No	Asymptomatic	Personal vehicle	Private	Never	No	Never	No	Vegetarian	V
714	0.063	0	Negative	Female	Student	31	Senior Research Fellow	S	B+	B	Positive	No	No	No	No	No	No	Yes	Yes	Negative	No	No	No	No	No	No	No	No	No	No	2	No	1	No	1	No	0	No	No;No;No;No;No;No;No;No;No	Asymptomatic	Not traveling now a days	Private	Never	No	Never	No	Vegetarian	V
715	0.064	0	Negative	Male	Student	32	Research Scholar	S	O+	O	Positive	No	No	No	No	No	No	Yes	Yes	Negative	No	No	No	No	No	No	No	No	No	No	0	No	0	No	0	No	0	No	No;No;No;No;No;No;No;No;No	Asymptomatic	Personal vehicle	Private	Never	No	Never	No	Vegetarian	V
716	0.066	0	Negative	Male	Student	31	RESEARCH FELLOW	S	B+	B	Positive	No	No	No	No	No	No	Yes	Yes	Negative	No	No	No	No	No	No	No	No	No	No	0	No	0	No	0	No	0	No	No;No;No;No;No;No;No;No;No	Asymptomatic	Personal vehicle	Private	Never	No	Never	No	Occasionally non veg	NV
717	23.13	1	Positive	Female	Staff	56	Job	S	B+	B	Positive	Yes	Yes	No	No	No	No	Yes	Yes	Negative	No	No	No	No	No	No	No	No	No	No	0	No	0	No	0	No	0	No	No;No;No;No;No;No;No;No;No	Asymptomatic	Personal vehicle	Private	Never	No	Never	No	Vegetarian	V
718	0.062	0	Negative	Male	Others	64	Pensioner CSIR-CDRI	S	B+	B	Positive	Yes	Yes	Yes	Yes	No	No	No	No		No	No	No	No	No	No	No	No	No	No	1	No	0	No	0	No	0	No	No;No;No;No;No;No;No;No;No	Asymptomatic	Personal vehicle	Private	Never	No	Occasionally	Occ	Occasionally non veg	NV
719	0.062	0	Negative	Male	Staff	54	Technical Staff	S	A+	A	Positive	Yes	Yes	Yes	Yes	No	No	No	No		No	No	No	No	No	No	No	No	No	No	0	No	0	No	0	No	0	No	No;No;No;No;No;No;No;No;No	Asymptomatic	Personal vehicle	Private	Never	No	Never	No	Occasionally non veg	NV
720	0.066	0	Negative	Female	Staff	56	Service	S	B+	B	Positive	No	No	No	No	No	No	No	No		No	No	No	No	No	No	No	No	No	No	0	No	0	No	0	No	0	No	No;No;No;No;No;No;No;No;No	Asymptomatic	Personal vehicle	Private	Never	No	Never	No	Occasionally non veg	NV
721	0.061	0	Negative	Male	Staff	57	GOVT SERVICE	S	AB+	AB	Positive	Yes	Yes	Yes	Yes	No	No	Yes	Yes	Negative	No	No	No	No	No	No	No	No	No	No	1	No	0	No	0	No	0	No	No;No;No;No;No;No;No;No;No	Asymptomatic	Personal vehicle	Private	Never	No	Occasionally	Occ	Occasionally non veg	NV
722	0.068	0	Negative	Male	Student	28	Research scholar	S	B+	B	Positive	No	No	No	No	No	No	Yes	Yes	Negative	No	No	No	No	No	No	No	No	No	No	0	No	0	No	5	Yes	0	No	No;No;No;No;No;No;No;Yes;No	Symptomatic	Living in CDRI Hostel	Private	Never	No	Never	No	Vegetarian	V
723	0.064	0	Negative	Male	Staff	38	Service	S	O+	O	Positive	No	No	Yes	Yes	No	No	No	No		No	No	No	No	No	No	No	No	No	No	0	No	0	No	0	No	0	No	No;No;No;No;No;No;No;No;No	Asymptomatic	Personal vehicle	Private	Never	No	Occasionally	Occ	Non vegetarian	NV
724	0.068	0	Negative	Male	Staff	56	SERVICE	S	O+	O	Positive	No	No	No	No	No	No	No	No		No	No	No	No	No	No	No	No	No	No	0	No	0	No	0	No	0	No	No;No;No;No;No;No;No;No;No	Asymptomatic	Personal vehicle	Private	Never	No	Never	No	Vegetarian	V
725	0.08	0	Negative	Female	Student	26	PhD Student	S	B+	B	Positive	No	No	No	No	No	No	Yes	Yes	Negative	No	No	No	No	No	No	No	No	No	No	3	Yes	2	No	1	No	0	No	No;No;No;No;No;Yes;No;No;No	Symptomatic	Personal vehicle	Private	Never	No	Never	No	Occasionally non veg	NV
726	0.202	0	Negative	Female	Student	33	Researcher	S	O+	O	Positive	No	No	No	No	No	No	No	No		No	No	No	No	No	No	No	No	No	No	0	No	0	No	0	No	0	No	No;No;No;No;No;No;No;No;No	Asymptomatic	Personal vehicle	Private	Never	No	Never	No	Non vegetarian	NV
727	0.066	0	Negative	Male	Faculty	45	Scientist	S	B+	B	Positive	No	No	No	No	No	No	No	No		No	No	No	No	Yes	Yes	No	No	No	No	1	No	2	No	2	No	0	No	No;No;Yes;No;No;No;No;No;No	Symptomatic	Personal vehicle	Private	Never	No	Occasionally	Occ	Occasionally non veg	NV
728	0.067	0	Negative	Female	Staff	58	CENTRAL GOVERMENT EMPLOYEE (CDRI LUCKNOW)	S	B+	B	Positive	No	No	Yes	Yes	No	No	Yes	Yes	Negative	No	No	No	No	No	No	No	No	No	No	0	No	0	No	0	No	0	No	No;No;No;No;No;No;No;No;No	Asymptomatic	Personal vehicle	Private	Never	No	Never	No	Vegetarian	V
729	0.066	0	Negative	Male	Staff	59	GOVT.SERVICE	S	O-	O	Negative	No	No	No	No	No	No	No	No		No	No	No	No	No	No	No	No	No	No	0	No	0	No	0	No	0	No	No;No;No;No;No;No;No;No;No	Asymptomatic	Personal vehicle	Private	Never	No	Occasionally	Occ	Vegetarian	V
730	0.076	0	Negative	Male	Faculty	41	GOVT. JOB	S	O+	O	Positive	No	No	Yes	Yes	No	No	Yes	Yes	Negative	No	No	No	No	No	No	No	No	No	No	0	No	0	No	0	No	0	No	No;No;No;No;No;No;No;No;No	Asymptomatic	Personal vehicle	Private	Never	No	Never	No	Vegetarian	V
731	0.083	0	Negative	Male	Faculty	58	Service	S	B+	B	Positive	No	No	Yes	Yes	No	No	No	No		No	No	No	No	No	No	No	No	No	No	0	No	0	No	0	No	0	No	No;No;No;No;No;No;No;No;No	Asymptomatic	Personal vehicle	Private	Never	No	Never	No	Occasionally non veg	NV
732	0.065	0	Negative	Male	Staff	35	Government Job	S	B+	B	Positive	No	No	No	No	No	No	Yes	Yes	Negative	No	No	No	No	No	No	No	No	No	No	0	No	0	No	0	No	0	No	No;No;No;No;No;No;No;No;No	Asymptomatic	Personal vehicle	Private	Never	No	Never	No	Vegetarian	V
733	0.061	0	Negative	Female	Faculty	58	Scientist	S	A+	A	Positive	No	No	Yes	Yes	Yes	Yes	Yes	Yes	Negative	Yes	Yes	No	No	No	No	No	No	No	No	2	No	1	No	1	No	0	No	Yes;No;No;No;No;No;No;No;No	Symptomatic	Personal vehicle	Private	Never	No	Never	No	Vegetarian	V
734	10.28	1	Positive	Male	Staff	34	Technical officer	S	A+	A	Positive	No	No	Yes	Yes	No	No	Yes	Yes	Negative	No	No	No	No	Yes	Yes	No	No	No	No	1	No	1	No	0	No	0	No	No;No;Yes;No;No;No;No;No;No	Symptomatic	by walk	Private	Sporadic	Yes	Occasionally	Occ	Occasionally non veg	NV
735	0.065	0	Negative	Male	Staff	57	Govt. Employee	S	B+	B	Positive	No	No	Yes	Yes	Yes	Yes	No	No		No	No	No	No	No	No	No	No	No	No	0	No	0	No	0	No	0	No	No;No;No;No;No;No;No;No;No	Asymptomatic	Personal vehicle	Private	Never	No	Never	No	Vegetarian	V
736	0.061	0	Negative	Male	Staff	48	SERVICE	S	O+	O	Positive	No	No	No	No	No	No	Yes	Yes	Negative	No	No	No	No	No	No	No	No	No	No	0	No	0	No	0	No	0	No	No;No;No;No;No;No;No;No;No	Asymptomatic	Personal vehicle	Private	Never	No	Never	No	Occasionally non veg	NV
737	0.066	0	Negative	Male	Student	27	Research scholar	S		SU	SU	No	No	No	No	No	No	Yes	Yes	Negative	No	No	No	No	No	No	No	No	No	No	1	No	0	No	0	No	0	No	No;No;No;No;No;No;No;No;No	Asymptomatic	Personal vehicle	Private	Never	No	Never	No	Occasionally non veg	NV
738	0.067	0	Negative	Male	Student	29	STUDENTS	S	O+	O	Positive	No	No	No	No	No	No	Yes	Yes	Negative	No	No	No	No	No	No	No	No	No	No	0	No	0	No	0	No	0	No	No;No;No;No;No;No;No;No;No	Asymptomatic	Personal vehicle	Private	Never	No	Never	No	Occasionally non veg	NV
739	0.061	0	Negative	Male	Student	30	Student	S	B+	B	Positive	No	No	No	No	No	No	Yes	Yes	Negative	No	No	No	No	No	No	No	No	No	No	0	No	0	No	0	No	0	No	No;No;No;No;No;No;No;No;No	Asymptomatic	Personal vehicle	Private	Never	No	Never	No	Non vegetarian	NV
740	0.068	0	Negative	Male	Faculty	41	Scientist	S	B+	B	Positive	No	No	No	No	No	No	Yes	Yes	Negative	No	No	No	No	No	No	No	No	No	No	1	No	1	No	0	No	0	No	No;No;No;No;No;No;No;No;No	Asymptomatic	Personal vehicle	Private	Never	No	Occasionally	Occ	Vegetarian	V
741	0.067	0	Negative	Male	Faculty	35	Scientist	S	B+	B	Positive	No	No	No	No	No	No	No	No		No	No	No	No	No	No	No	No	No	No	0	No	0	No	1	No	0	No	No;No;No;No;No;No;No;No;No	Asymptomatic	Personal vehicle	Private	Never	No	Never	No	Non vegetarian	NV
742	0.063	0	Negative	Male	Staff	38	Service	S	A+	A	Positive	No	No	No	No	No	No	Yes	Yes	Negative	No	No	No	No	No	No	No	No	No	No	0	No	0	No	0	No	0	No	No;No;No;No;No;No;No;No;No	Asymptomatic	Personal vehicle	Private	Never	No	Never	No	Non vegetarian	NV
743	0.065	0	Negative	Female	Faculty	43	RESEARCH	S	O+	O	Positive	No	No	No	No	No	No	Yes	Yes	Negative	No	No	No	No	No	No	No	No	No	No	0	No	0	No	0	No	0	No	No;No;No;No;No;No;No;No;No	Asymptomatic	Personal vehicle	Private	Never	No	Never	No	Vegetarian	V
744	0.069	0	Negative	Male	Faculty	36	Scientist	S	O+	O	Positive	No	No	No	No	No	No	Yes	Yes	Negative	No	No	No	No	No	No	No	No	No	No	2	No	1	No	1	No	1	No	No;No;No;No;No;No;No;No;No	Asymptomatic	Personal vehicle	Private	Never	No	Occasionally	Occ	Non vegetarian	NV
745	0.064	0	Negative	Male	Faculty	46	senior Principal Scientist	S	O+	O	Positive	No	No	No	No	No	No	Yes	Yes	Negative	No	No	No	No	No	No	No	No	No	No	0	No	0	No	0	No	0	No	No;No;No;No;No;No;No;No;No	Asymptomatic	Personal vehicle	Private	Regular	Yes	Occasionally	Occ	Occasionally non veg	NV
746	0.062	0	Negative	Male	Faculty	41	Scientist	S	AB+	AB	Positive	No	No	No	No	No	No	Yes	Yes	Negative	No	No	No	No	No	No	No	No	No	No	0	No	0	No	0	No	0	No	No;No;No;No;No;No;No;No;No	Asymptomatic	Personal vehicle	Private	Never	No	Never	No	Non vegetarian	NV
747	0.064	0	Negative	Male	Faculty	36	Sceintist	S	O+	O	Positive	No	No	No	No	No	No	Yes	Yes	Negative	No	No	No	No	No	No		SU		SU	0	No	0	No	0	No	0	No	No;No;No;SU;SU;No;No;No;No	Asymptomatic	Personal vehicle	Private	Never	No	Never	No	Non vegetarian	NV
748	0.091	0	Negative	Male	Staff	28	servies	S	O+	O	Positive	No	No	No	No	No	No	No	No		No	No	No	No	No	No	No	No	No	No	0	No	0	No	0	No	0	No	No;No;No;No;No;No;No;No;No	Asymptomatic	Personal vehicle	Private	Sporadic	Yes	Occasionally	Occ	Vegetarian	V
749	0.41	0	Negative	Male	Staff	60	govt. service	S	B+	B	Positive	No	No	No	No	No	No	No	No		No	No	No	No	No	No	No	No	No	No	0	No	0	No	0	No	0	No	No;No;No;No;No;No;No;No;No	Asymptomatic	Personal vehicle	Private	Sporadic	Yes	Often	Yes	Occasionally non veg	NV
750	0.069	0	Negative	Male	Student	31	STUDENT	S	A+	A	Positive	No	No	No	No	No	No	Yes	Yes	Negative	No	No	No	No	No	No	No	No	No	No	1	No	0	No	0	No	0	No	No;No;No;No;No;No;No;No;No	Asymptomatic	Personal vehicle	Private	Never	No	Occasionally	Occ	Occasionally non veg	NV
751	0.068	0	Negative	Male	Student	24	scholar	S	B+	B	Positive	No	No	No	No	No	No	Yes	Yes	Negative	No	No	No	No	No	No	No	No	No	No	3	Yes	2	No	0	No	2	No	No;No;No;No;No;Yes;No;No;No	Symptomatic	Personal vehicle	Private	Never	No	Never	No	Vegetarian	V
752	0.065	0	Negative	Male	Student	27	P.hD Scholar	S	O+	O	Positive	No	No	No	No	No	No	Yes	Yes	Negative	No	No	No	No	No	No	No	No	No	No	1	No	0	No	0	No	0	No	No;No;No;No;No;No;No;No;No	Asymptomatic	Personal vehicle	Private	Never	No	Never	No	Occasionally non veg	NV
753	0.061	0	Negative	Male	Faculty	50	Scientist	S	O+	O	Positive	No	No	No	No	No	No	Yes	Yes	Negative	No	No	No	No	No	No	No	No	No	No	0	No	0	No	0	No	0	No	No;No;No;No;No;No;No;No;No	Asymptomatic	Personal vehicle	Private	Never	No	Never	No	Vegetarian	V
754	0.065	0	Negative	Male	Staff	54	service	S	B+	B	Positive	No	No	No	No	No	No	No	No		No	No	No	No	No	No	No	No	No	No	0	No	0	No	0	No	0	No	No;No;No;No;No;No;No;No;No	Asymptomatic	Personal vehicle	Private	Never	No	Often	Yes	Occasionally non veg	NV
755	0.083	0	Negative	Male	Student	31	Research Scholar	S	A+	A	Positive	No	No	No	No	No	No	Yes	Yes	Negative	No	No	No	No	No	No	No	No	No	No	1	No	0	No	1	No	0	No	No;No;No;No;No;No;No;No;No	Asymptomatic	Personal vehicle	Private	Never	No	Never	No	Non vegetarian	NV
756	0.074	0	Negative	Male	Student	26	Research Scholar	S		SU	SU	No	No	No	No	No	No	No	No		No	No	No	No	No	No	No	No	No	No	0	No	0	No	0	No	1	No	No;No;No;No;No;No;No;No;No	Asymptomatic	Personal vehicle	Private	Never	No	Never	No	Vegetarian	V
757	0.065	0	Negative	Female	Staff	31	TECHNICAL ASSISTANT	S	O+	O	Positive	No	No	No	No	No	No	No	No		No	No	No	No	No	No	No	No	No	No	1	No	1	No	0	No	0	No	No;No;No;No;No;No;No;No;No	Asymptomatic	Walk	Private	Never	No	Never	No	Vegetarian	V
758	0.062	0	Negative	Male	Staff	45	Seniot Technical Officer-2	S	B+	B	Positive	No	No	No	No	No	No	No	No		No	No	No	No	No	No	No	No	No	No	1	No	0	No	0	No	0	No	No;No;No;No;No;No;No;No;No	Asymptomatic	Personal vehicle	Private	Sporadic	Yes	Occasionally	Occ	Occasionally non veg	NV
759	0.064	0	Negative	Male	Staff	42	Employee in CSIR-CDRI	S	B+	B	Positive	No	No	Yes	Yes	No	No	Yes	Yes	Negative	No	No	No	No	No	No	No	No	No	No	0	No	0	No	0	No	0	No	No;No;No;No;No;No;No;No;No	Asymptomatic	Personal vehicle	Private	Never	No	Never	No	Vegetarian	V
760	0.063	0	Negative	Male	Staff	57	Employee	S	B+	B	Positive	No	No	No	No	No	No	Yes	Yes	Negative	No	No	No	No	No	No	No	No	No	No	0	No	0	No	0	No	0	No	No;No;No;No;No;No;No;No;No	Asymptomatic	Personal vehicle	Private	Never	No	Never	No	Vegetarian	V
761	50.76	1	Positive	Male	Staff	59	Technitian at scientific institute	S	B+	B	Positive	No	No	No	No	No	No	Yes	Yes	Negative	No	No	No	No	No	No	No	No	No	No	0	No	0	No	0	No	0	No	No;No;No;No;No;No;No;No;No	Asymptomatic	Cycle	Private	Never	No	Never	No	Non vegetarian	NV
762	0.066	0	Negative	Male	Staff	54	Technician in Scientific service	S	B+	B	Positive	Yes	Yes	No	No	No	No	Yes	Yes	Negative	No	No	No	No	No	No	No	No	No	No	0	No	0	No	0	No	0	No	No;No;No;No;No;No;No;No;No	Asymptomatic	Personal vehicle	Private	Never	No	Never	No	Vegetarian	V
763	0.064	0	Negative	Female	Student	29	Research Scholar	S	O+	O	Positive	No	No	No	No	No	No	Yes	Yes	Negative	No	No	No	No	No	No	No	No	No	No	1	No	0	No	1	No	0	No	No;No;No;No;No;No;No;No;No	Asymptomatic	Personal vehicle	Private	Never	No	Never	No	Occasionally non veg	NV
764	0.06	0	Negative	Male	Staff	54	Service	S	B+	B	Positive	No	No	No	No	No	No	No	No		No	No	No	No	No	No	No	No	No	No	2	No	1	No	0	No	0	No	No;No;No;No;No;No;No;No;No	Asymptomatic	Personal vehicle	Private	Regular	Yes	Occasionally	Occ	Non vegetarian	NV
765	76.75	1	Positive	Male	Staff	58	Job	S	B+	B	Positive	Yes	Yes	No	No	No	No	Yes	Yes	Negative	No	No	No	No	No	No	No	No	No	No	0	No	0	No	0	No	0	No	No;No;No;No;No;No;No;No;No	Asymptomatic	Personal vehicle	Private	Never	No	Never	No	Vegetarian	V
766	0.061	0	Negative	Male	Staff	48	Job	S	B+	B	Positive	No	No	No	No	No	No	Yes	Yes	Negative	No	No	No	No	No	No	No	No	No	No	5	Yes	0	No	0	No	0	No	No;No;No;No;No;Yes;No;No;No	Symptomatic	Personal vehicle	Private	Regular	Yes	Never	No	Non vegetarian	NV
767	0.063	0	Negative	Male	Faculty	57	Service	S	O+	O	Positive	No	No	No	No	No	No	No	No		No	No	No	No	No	No	No	No	No	No	0	No	0	No	0	No	0	No	No;No;No;No;No;No;No;No;No	Asymptomatic	Personal vehicle	Private	Never	No	Never	No	Occasionally non veg	NV
768	0.064	0	Negative	Male	Faculty	51	Scientist	S	B+	B	Positive	No	No	No	No	No	No	Yes	Yes	Negative	No	No	No	No	No	No	No	No	No	No	0	No	0	No	0	No	0	No	No;No;No;No;No;No;No;No;No	Asymptomatic	Personal vehicle	Private	Never	No	Never	No	Vegetarian	V
769	0.064	0	Negative	Male	Staff	57	SERVICE	S	A+	A	Positive	No	No	Yes	Yes	No	No	No	No		No	No	No	No	No	No	No	No	No	No	0	No	0	No	0	No	0	No	No;No;No;No;No;No;No;No;No	Asymptomatic	Personal vehicle	Private	Never	No	Never	No	Vegetarian	V
770	0.105	0	Negative	Male	Staff	35	Goverment job	S	B+	B	Positive	No	No	Yes	Yes	No	No	Yes	Yes	Negative	No	No	No	No	No	No	No	No	No	No	0	No	0	No	0	No	0	No	No;No;No;No;No;No;No;No;No	Asymptomatic	Personal vehicle	Private	Never	No	Never	No	Vegetarian	V
771	0.065	0	Negative	Male	Staff	52	Technician	S	O+	O	Positive	Yes	Yes	Yes	Yes	Yes	Yes	No	No		No	No	No	No	No	No	No	No	No	No	2	No	1	No	1	No	0	No	No;No;No;No;No;No;No;No;No	Asymptomatic	Personal vehicle	Private	Never	No	Never	No	Occasionally non veg	NV
772	0.062	0	Negative	Male	Staff	43	GOVT. SERVICE	S	B+	B	Positive	No	No	No	No	No	No	No	No		No	No	No	No	No	No	No	No	No	No	0	No	0	No	0	No	0	No	No;No;No;No;No;No;No;No;No	Asymptomatic	Personal vehicle	Private	Sporadic	Yes	Occasionally	Occ	Occasionally non veg	NV
773	0.067	0	Negative	Female	Faculty	43	Biological Research	S	A+	A	Positive	No	No	No	No	No	No	Yes	Yes	Negative	No	No	No	No	No	No	No	No	No	No	1	No	1	No	1	No	0	No	No;No;No;No;No;No;No;No;No	Asymptomatic	Personal vehicle	Private	Never	No	Never	No	Vegetarian	V
774	0.064	0	Negative	Male	Student	28	STUDENT	S	A+	A	Positive	No	No	No	No	No	No	No	No		No	No	No	No	No	No	No	No	No	No	0	No	0	No	0	No	0	No	No;No;No;No;No;No;No;No;No	Asymptomatic	Personal vehicle	Private	Never	No	Never	No	Non vegetarian	NV
775	0.068	0	Negative	Female	Student	25	Research Scholar	S	A+	A	Positive	No	No	No	No	No	No	Yes	Yes	Negative	No	No	No	No	No	No	No	No	No	No	2	No	2	No	1	No	0	No	No;No;No;No;No;No;No;No;No	Asymptomatic	Personal vehicle	Private	Never	No	Never	No	Non vegetarian	NV
776	0.065	0	Negative	Male	Staff	31	RESEARCH	S	B+	B	Positive	No	No	Yes	Yes	No	No	Yes	Yes	Negative	No	No	No	No	No	No	No	No	No	No	0	No	0	No	0	No	0	No	No;No;No;No;No;No;No;No;No	Asymptomatic	Personal vehicle	Private	Never	No	Never	No	Occasionally non veg	NV
777	0.082	0	Negative	Female	Student	24	Project JRF	S	O+	O	Positive	No	No	No	No	No	No	Yes	Yes	Negative	No	No	No	No	No	No	No	No	No	No	0	No	0	No	0	No	0	No	No;No;No;No;No;No;No;No;No	Asymptomatic	Walking	Private	Never	No	Never	No	Vegetarian	V
778	0.064	0	Negative	Female	Student	25	Research fellow	S	B+	B	Positive	No	No	No	No	No	No	Yes	Yes	Negative	No	No	No	No	No	No	No	No	No	No	3	Yes	0	No	4	Yes	0	No	No;No;No;No;No;Yes;No;Yes;No	Symptomatic	Walking	Private	Never	No	Never	No	Vegetarian	V
779	0.101	0	Negative	Male	Student	28	Student	S	B+	B	Positive	No	No	No	No	No	No	Yes	Yes	Negative	No	No	No	No	No	No	No	No	No	No	0	No	0	No	0	No	0	No	No;No;No;No;No;No;No;No;No	Asymptomatic	Personal vehicle	Private	Never	No	Never	No	Occasionally non veg	NV
780	0.064	0	Negative	Male	Student	25	Research Scholar	S	B+	B	Positive	No	No	No	No	No	No	Yes	Yes	Negative	No	No	No	No	No	No	No	No	No	No	1	No	0	No	0	No	0	No	No;No;No;No;No;No;No;No;No	Asymptomatic	Personal vehicle	Private	Sporadic	Yes	Occasionally	Occ	Vegetarian	V
781	0.065	0	Negative	Female	Student	24	Research scholar	S	B+	B	Positive	No	No	No	No	No	No	Yes	Yes	Negative	No	No	No	No	No	No	No	No	No	No	0	No	0	No	0	No	0	No	No;No;No;No;No;No;No;No;No	Asymptomatic	Personal vehicle	Private	Never	No	Never	No	Vegetarian	V
782	0.069	0	Negative	Female	Student	28	STUDENT	S	O+	O	Positive	No	No	No	No	No	No	Yes	Yes	Negative	No	No	No	No	No	No	No	No	No	No	0	No	0	No	0	No	0	No	No;No;No;No;No;No;No;No;No	Asymptomatic	Personal vehicle	Private	Never	No	Never	No	Vegetarian	V
783	0.067	0	Negative	Male	Faculty	38	Scientist	S	O+	O	Positive	No	No	No	No	No	No	No	No		No	No	No	No	No	No	No	No	No	No	0	No	1	No	0	No	0	No	No;No;No;No;No;No;No;No;No	Asymptomatic	Personal vehicle	Private	Never	No	Occasionally	Occ	Non vegetarian	NV
784	51.5	1	Positive	Male	Student	25	RESEARCH FELLOW	S	A+	A	Positive	No	No	No	No	No	No	Yes	Yes	Negative	No	No	No	No	No	No	No	No	No	No	3	Yes	2	No	0	No	1	No	No;No;No;No;No;Yes;No;No;No	Symptomatic	Personal vehicle	Private	Never	No	Never	No	Non vegetarian	NV
785	0.065	0	Negative	Male	Student	25	Research Scholar	S	O+	O	Positive	No	No	No	No	No	No	Yes	Yes	Negative	No	No	No	No	No	No	No	No	No	No	0	No	0	No	0	No	0	No	No;No;No;No;No;No;No;No;No	Asymptomatic	Personal vehicle	Private	Never	No	Never	No	Occasionally non veg	NV
786	0.065	0	Negative	Male	Student	28	Research Scholar	S	B+	B	Positive	No	No	No	No	No	No	Yes	Yes	Negative	No	No	No	No	No	No	No	No	No	No	1	No	1	No	1	No	0	No	No;No;No;No;No;No;No;No;No	Asymptomatic	Personal vehicle	Private	Never	No	Never	No	Occasionally non veg	NV
787	0.068	0	Negative	Male	Student	26	P.hD scholar	S	B+	B	Positive	No	No	No	No	No	No	Yes	Yes	Negative	No	No	No	No	No	No	No	No	No	No	1	No	0	No	0	No	0	No	No;No;No;No;No;No;No;No;No	Asymptomatic	Personal vehicle	Private	Never	No	Never	No	Occasionally non veg	NV
788	0.082	0	Negative	Male	Student	24	STUDENT	S	O+	O	Positive	No	No	No	No	No	No	No	No		No	No	No	No	No	No	No	No	No	No	0	No	0	No	0	No	0	No	No;No;No;No;No;No;No;No;No	Asymptomatic	Personal vehicle	Private	Never	No	Never	No	Vegetarian	V
789	0.065	0	Negative	Male	Student	25	RESEARCH SCHOLAR	S	B+	B	Positive	No	No	No	No	No	No	Yes	Yes	Negative	No	No	No	No	No	No	No	No	No	No	0	No	0	No	0	No	0	No	No;No;No;No;No;No;No;No;No	Asymptomatic	Personal vehicle	Private	Never	No	Never	No	Occasionally non veg	NV
790	0.067	0	Negative	Male	Student	29	STUDENT	S	B+	B	Positive	No	No	No	No	No	No	Yes	Yes	Negative	No	No	No	No	No	No	No	No	No	No	0	No	0	No	0	No	0	No	No;No;No;No;No;No;No;No;No	Asymptomatic	Personal vehicle	Private	Regular	Yes	Never	No	Occasionally non veg	NV
791	0.103	0	Negative	Female	Student	28	CSIR-JRF (PhD, Research Scholar)	S	B+	B	Positive	No	No	No	No	No	No	Yes	Yes	Negative	No	No	No	No	No	No	No	No	No	No	1	No	1	No	1	No	0	No	No;No;No;No;No;No;No;No;No	Asymptomatic	NO TRANSPORT	Private	Never	No	Never	No	Vegetarian	V
792	0.066	0	Negative	Female	Staff	56	P.T.O	S	O+	O	Positive	No	No	Yes	Yes	No	No	No	No		No	No	No	No	No	No	No	No	No	No	1	No	1	No	0	No	0	No	No;No;No;No;No;No;No;No;No	Asymptomatic	Personal vehicle	Private	Never	No	Never	No	Vegetarian	V
793	0.063	0	Negative	Male	Faculty	47	Scientist	S	B+	B	Positive	No	No	No	No	No	No	Yes	Yes	Negative	No	No	No	No	No	No	No	No		SU	3	Yes	2	No	2	No	1	No	No;No;No;No;SU;Yes;No;No;No	Symptomatic	Personal vehicle	Private	Never	No	Occasionally	Occ	Occasionally non veg	NV
794	0.068	0	Negative	Male	Faculty	41	Scientist	S	O+	O	Positive	No	No	No	No	No	No	No	No		No	No	No	No	No	No	No	No	No	No	1	No	0	No	0	No	0	No	No;No;No;No;No;No;No;No;No	Asymptomatic	Personal vehicle	Private	Sporadic	Yes	Occasionally	Occ	Non vegetarian	NV
795	0.064	0	Negative	Male	Faculty	55	Service	S	O+	O	Positive	No	No	No	No	No	No	Yes	Yes	Negative	No	No	No	No	No	No	No	No	No	No	0	No	0	No	0	No	0	No	No;No;No;No;No;No;No;No;No	Asymptomatic	Personal vehicle	Private	Never	No	Never	No	Occasionally non veg	NV
796	0.065	0	Negative	Female	Student	29	Student	S	O+	O	Positive	No	No	No	No	No	No	Yes	Yes	Negative	No	No	No	No	No	No	No	No	No	No	3	Yes	0	No	0	No	0	No	No;No;No;No;No;Yes;No;No;No	Symptomatic	Personal vehicle	Private	Never	No	Never	No	Vegetarian	V
797	0.065	0	Negative	Female	Student	26	Research Scholar	S	B+	B	Positive	No	No	No	No	No	No	Yes	Yes	Negative	No	No	No	No	No	No	No	No	No	No	2	No	1	No	0	No	0	No	No;No;No;No;No;No;No;No;No	Asymptomatic	Personal vehicle	Private	Never	No	Never	No	Vegetarian	V
798	0.068	0	Negative	Male	Student	29	Research Scholar	S	O+	O	Positive	No	No	No	No	No	No	Yes	Yes	Negative	No	No	No	No	No	No	No	No	No	No	0	No	0	No	0	No	0	No	No;No;No;No;No;No;No;No;No	Asymptomatic	Personal vehicle	Private	Never	No	Never	No	Non vegetarian	NV
799	0.064	0	Negative	Male	Student	26	Research scholar	S	B+	B	Positive	No	No	No	No	No	No	No	No		No	No	No	No	No	No	No	No	No	No	1	No	1	No	1	No	1	No	No;No;No;No;No;No;No;No;No	Asymptomatic	Personal vehicle	Private	Never	No	Never	No	Non vegetarian	NV
800	0.065	0	Negative	Male	Student	31	Student	S		SU	SU	No	No	No	No	No	No	No	No		No	No	No	No	No	No	No	No	No	No	1	No	1	No	0	No	1	No	No;No;No;No;No;No;No;No;No	Asymptomatic	Personal vehicle	Private	Never	No	Never	No	Vegetarian	V
801	0.225	0	Negative	Male	Student	26	Research scholar	S	B+	B	Positive	No	No	No	No	No	No	Yes	Yes	Negative	No	No	No	No	No	No	No	No	No	No	2	No	1	No	2	No	0	No	No;No;No;No;No;No;No;No;No	Asymptomatic	Personal vehicle	Private	Never	No	Never	No	Vegetarian	V
802	0.245	0	Negative	Male	Staff	59	Service	S	B+	B	Positive	No	No	Yes	Yes	No	No	Yes	Yes	Negative	No	No	No	No	No	No	No	No	No	No	0	No	0	No	0	No	0	No	No;No;No;No;No;No;No;No;No	Asymptomatic	Personal vehicle	Private	Never	No	Never	No	Vegetarian	V
803	0.06	0	Negative	Male	Staff	58	Service	S	O+	O	Positive	Yes	Yes	No	No	No	No	Yes	Yes	Negative	No	No	No	No	No	No	No	No	No	No	0	No	0	No	0	No	0	No	No;No;No;No;No;No;No;No;No	Asymptomatic	Public transport	Public	Never	No	Occasionally	Occ	Vegetarian	V
804	0.064	0	Negative	Male	Staff	56	Service	S	A+	A	Positive	No	No	No	No	No	No	Yes	Yes	Negative	No	No	No	No	No	No	No	No	No	No	0	No	0	No	0	No	0	No	No;No;No;No;No;No;No;No;No	Asymptomatic	Personal vehicle	Private	Never	No	Never	No	Vegetarian	V
805	0.065	0	Negative	Male	Staff	38	RESEARCH	S	B+	B	Positive	No	No	No	No	No	No	Yes	Yes	Negative	No	No	No	No	No	No	No	No	No	No	1	No	1	No	1	No	0	No	No;No;No;No;No;No;No;No;No	Asymptomatic	Personal vehicle	Private	Sporadic	Yes	Occasionally	Occ	Occasionally non veg	NV
806	0.066	0	Negative	Male	Faculty	42	Nodal officer, biomedical waste disposal	S	B-	B	Negative	Yes	Yes	No	No	No	No	Yes	Yes	Negative	No	No	No	No	No	No	No	No	No	No	1	No	0	No	0	No	0	No	No;No;No;No;No;No;No;No;No	Asymptomatic	Personal vehicle	Private	Never	No	Never	No	Occasionally non veg	NV
807	0.065	0	Negative	Male	Faculty	42	Principal Scientist	S	AB+	AB	Positive	No	No	No	No	No	No	Yes	Yes	Negative	No	No	No	No	No	No	No	No	No	No	0	No	0	No	0	No	0	No	No;No;No;No;No;No;No;No;No	Asymptomatic	Personal vehicle	Private	Never	No	Occasionally	Occ	Occasionally non veg	NV
808	0.064	0	Negative	Male	Faculty	39	Senior Scientist	S	B+	B	Positive	No	No	No	No	No	No	Yes	Yes	Negative	No	No	No	No	Yes	Yes	No	No	No	No	1	No	0	No	0	No	0	No	No;No;Yes;No;No;No;No;No;No	Symptomatic	Personal vehicle	Private	Never	No	Never	No	Vegetarian	V
809	0.067	0	Negative	SU		SU		SU		SU	SU		SU		SU		SU		SU			SU		SU		SU		SU		SU	Blank	SU	Blank	SU	Blank	SU	Blank	SU	SU;SU;SU;SU;SU;SU;SU;SU;SU	SU		Private		SU		SU		SU
810	0.064	0	Negative	Male	Faculty	55	Scientist	S	O+	O	Positive	No	No	No	No	No	No	Yes	Yes	Negative	No	No	No	No	No	No	No	No	No	No	1	No	0	No	0	No	0	No	No;No;No;No;No;No;No;No;No	Asymptomatic	Personal vehicle	Private	Regular	Yes	Often	Yes	Non vegetarian	NV
811	0.062	0	Negative	Male	Faculty	42	Principal Scientist	S	O+	O	Positive	No	No	No	No	No	No	No	No		No	No	No	No	No	No	No	No	No	No	1	No	0	No	0	No	0	No	No;No;No;No;No;No;No;No;No	Asymptomatic	Personal vehicle	Private	Never	No	Never	No	Non vegetarian	NV
812	0.062	0	Negative	Male	Staff	45	Govt. Employee	S	B+	B	Positive	Yes	Yes	No	No	No	No	Yes	Yes	Negative	No	No	No	No	No	No	No	No	No	No	1	No	1	No	0	No	0	No	No;No;No;No;No;No;No;No;No	Asymptomatic	Personal vehicle	Private	Never	No	Occasionally	Occ	Non vegetarian	NV
813	0.067	0	Negative	Male	Faculty	34	Scientist	S	B+	B	Positive	No	No	No	No	No	No	Yes	Yes	Negative	No	No	No	No	No	No	No	No	No	No	0	No	0	No	0	No	0	No	No;No;No;No;No;No;No;No;No	Asymptomatic	Personal vehicle	Private	Never	No	Occasionally	Occ	Occasionally non veg	NV
814	0.063	0	Negative	Male	Student	32	RESERACH SCHOLAR	S	B-	B	Negative	No	No	No	No	No	No	No	No		No	No	No	No	No	No	No	No	No	No	0	No	0	No	0	No	0	No	No;No;No;No;No;No;No;No;No	Asymptomatic	Personal vehicle	Private	Never	No	Never	No	Vegetarian	V
815	0.063	0	Negative	Male	Student	30	RESEARCH SCHOLAR	S		SU	SU	No	No	No	No	No	No	No	No		No	No	No	No	No	No	No	No	No	No	2	No	0	No	0	No	0	No	No;No;No;No;No;No;No;No;No	Asymptomatic	Personal vehicle	Private	Never	No	Never	No	Occasionally non veg	NV
816	0.064	0	Negative	Male	Staff	36	GOVT. JOB	S	B+	B	Positive	No	No	No	No	No	No	No	No		No	No	No	No	No	No	No	No	No	No	2	No	2	No	2	No	0	No	No;No;No;No;No;No;No;No;No	Asymptomatic	Personal vehicle	Private	Never	No	Occasionally	Occ	Occasionally non veg	NV
817	0.188	0	Negative	Female	Student	29	Research Scholar	S	B+	B	Positive	No	No	No	No	No	No	Yes	Yes	Negative	No	No	No	No	No	No	No	No	No	No	0	No	0	No	3	Yes	0	No	No;No;No;No;No;No;No;Yes;No	Symptomatic	walk	Private	Never	No	Never	No	Vegetarian	V
818	0.065	0	Negative	Male	Others	34	Research	S	O+	O	Positive	Yes	Yes	No	No	No	No	Yes	Yes	Negative	No	No	No	No	No	No	No	No	No	No	0	No	0	No	0	No	0	No	No;No;No;No;No;No;No;No;No	Asymptomatic	Personal vehicle	Private	Never	No	Never	No	Occasionally non veg	NV
819	0.072	0	Negative	Male	Student	30	Student	S	O+	O	Positive	No	No	No	No	No	No	Yes	Yes	Negative	No	No	No	No	No	No	No	No	No	No	1	No	0	No	0	No	0	No	No;No;No;No;No;No;No;No;No	Asymptomatic	Personal vehicle	Private	Never	No	Never	No	Occasionally non veg	NV
820	0.072	0	Negative	Female	Student	31	Research Scholar	S	O+	O	Positive	No	No	No	No	No	No	No	No		No	No	No	No	No	No	No	No	No	No	0	No	0	No	0	No	0	No	No;No;No;No;No;No;No;No;No	Asymptomatic	Personal vehicle	Private	Never	No	Never	No	Vegetarian	V
821	0.063	0	Negative	Male	Student	29	Student	S	B+	B	Positive	No	No	No	No	No	No	Yes	Yes	Negative	No	No	No	No	No	No	No	No	No	No	2	No	0	No	0	No	0	No	No;No;No;No;No;No;No;No;No	Asymptomatic	Personal vehicle	Private	Never	No	Occasionally	Occ	Vegetarian	V
822	0.07	0	Negative	Female	Student	26	Student	S	B+	B	Positive	No	No	No	No	No	No	No	No		No	No	Yes	Yes	No	No	No	No	No	No	2	No	2	No	1	No	2	No	No;Yes;No;No;No;No;No;No;No	Symptomatic	Personal vehicle	Private	Never	No	Never	No	Vegetarian	V
823	0.063	0	Negative	Male	Staff	54	Service	S	AB+	AB	Positive	Yes	Yes	No	No	No	No	Yes	Yes	Negative	No	No	No	No	No	No	No	No	No	No	0	No	0	No	0	No	0	No	No;No;No;No;No;No;No;No;No	Asymptomatic	Personal vehicle	Private	Regular	Yes	Occasionally	Occ	Non vegetarian	NV
824	0.066	0	Negative	Male	Faculty	59	Chief scientist	S	B+	B	Positive	No	No	No	No	Yes	Yes	Yes	Yes		No	No	No	No	No	No	No	No	No	No	1	No	1	No	0	No	0	No	No;No;No;No;No;No;No;No;No	Asymptomatic	Personal vehicle	Private	Never	No	Never	No	Vegetarian	V
825	0.065	0	Negative	Male	Student	26	Student	S	B+	B	Positive	No	No	No	No	No	No	Yes	Yes	Negative	No	No	No	No	No	No	No	No	No	No	0	No	0	No	0	No	0	No	No;No;No;No;No;No;No;No;No	Asymptomatic	by walking	Private	Never	No	Never	No	Occasionally non veg	NV
826	0.064	0	Negative	Female	Student	24	STUDENT	S	A+	A	Positive	No	No	No	No	No	No	No	No		No	No	No	No	No	No	No	No	No	No	0	No	0	No	0	No	0	No	No;No;No;No;No;No;No;No;No	Asymptomatic	Walking	Private	Never	No	Never	No	Vegetarian	V
827	0.061	0	Negative	Male	Student	36	Senior Research Fellow	S		SU	SU	No	No	No	No	No	No	Yes	Yes	Negative	No	No	Yes	Yes	Yes	Yes	No	No	No	No	3	Yes	3	Yes	2	No	0	No	No;Yes;Yes;No;No;Yes;Yes;No;No	Symptomatic	Personal vehicle	Private	Never	No	Never	No	Occasionally non veg	NV
828	0.063	0	Negative	Male	Staff	39	Salaried	S	B+	B	Positive	No	No	No	No	No	No	Yes	Yes	Negative	No	No	No	No	No	No	No	No	No	No	1	No	0	No	0	No	0	No	No;No;No;No;No;No;No;No;No	Asymptomatic	Personal vehicle	Private	Never	No	Never	No	Vegetarian	V
829	0.065	0	Negative	Male	Staff	34	Technical Officer at CSIR-CDRI Lucknow	S	A+	A	Positive	No	No	No	No	No	No	Yes	Yes	Negative	No	No	No	No	No	No	No	No	No	No	0	No	0	No	0	No	0	No	No;No;No;No;No;No;No;No;No	Asymptomatic	Personal vehicle	Private	Never	No	Never	No	Vegetarian	V
830	0.064	0	Negative	Male	Staff	35	Govt. Employee	S	O+	O	Positive	No	No	No	No	No	No	Yes	Yes	Negative	No	No	No	No	No	No	No	No	No	No	1	No	0	No	0	No	0	No	No;No;No;No;No;No;No;No;No	Asymptomatic	Personal vehicle	Private	Never	No	Never	No	Vegetarian	V
831	0.061	0	Negative	Male	Staff	40	Government service	S	O+	O	Positive	No	No	Yes	Yes	No	No	Yes	Yes	Negative	No	No	No	No	No	No	No	No	No	No	0	No	0	No	0	No	0	No	No;No;No;No;No;No;No;No;No	Asymptomatic	Personal vehicle	Private	Never	No	Never	No	Vegetarian	V
832	0.063	0	Negative	Male	Staff	56	Service	S	O+	O	Positive	No	No	No	No	No	No	Yes	Yes	Negative	No	No	No	No	No	No	No	No	No	No	0	No	0	No	0	No	0	No	No;No;No;No;No;No;No;No;No	Asymptomatic	Personal vehicle	Private	Never	No	Never	No	Non vegetarian	NV
833	0.063	0	Negative	Male	Student	24	student	S	O+	O	Positive	No	No	No	No	No	No	No	No		No	No	No	No	No	No	No	No	No	No	0	No	0	No	0	No	0	No	No;No;No;No;No;No;No;No;No	Asymptomatic	Personal vehicle	Private	Sporadic	Yes	Occasionally	Occ	Non vegetarian	NV
834	0.07	0	Negative	Male	Faculty	37	Scientist	S	B+	B	Positive	No	No	No	No	No	No	No	No		No	No	No	No	No	No	No	No	No	No	0	No	0	No	0	No	0	No	No;No;No;No;No;No;No;No;No	Asymptomatic	Personal vehicle	Private	Sporadic	Yes	Never	No	Vegetarian	V
835	0.064	0	Negative	Female	Student	28	STUDENT	S	B+	B	Positive	No	No	No	No	No	No	No	No		No	No	No	No	No	No	No	No	No	No	1	No	1	No	1	No	0	No	No;No;No;No;No;No;No;No;No	Asymptomatic	Personal vehicle	Private	Never	No	Never	No	Vegetarian	V
836	0.065	0	Negative	Male	Student	27	Student	S	AB+	AB	Positive	No	No	No	No	No	No	No	No		No	No	No	No	No	No	No	No	No	No	1	No	0	No	0	No	0	No	No;No;No;No;No;No;No;No;No	Asymptomatic	By feet	Private	Never	No	Never	No	Occasionally non veg	NV
837	0.065	0	Negative	Male	Faculty	55	SCIENTIST	S	B+	B	Positive	Yes	Yes	No	No	No	No	Yes	Yes	Negative	No	No	No	No	No	No	No	No	No	No	0	No	2	No	2	No	0	No	No;No;No;No;No;No;No;No;No	Asymptomatic	Personal vehicle	Private	Sporadic	Yes	Occasionally	Occ	Occasionally non veg	NV
838	0.063	0	Negative	Male	Staff	58	Senior Tecnician A	S	B+	B	Positive	No	No	No	No	No	No	Yes	Yes	Negative	No	No	No	No	No	No	No	No	No	No	0	No	0	No	0	No	0	No	No;No;No;No;No;No;No;No;No	Asymptomatic	Personal vehicle	Private	Never	No	Never	No	Vegetarian	V
839	0.06	0	Negative	Male	Student	29	Student	S	B+	B	Positive	No	No	No	No	No	No	Yes	Yes	Negative	No	No	Yes	Yes	No	No	No	No	No	No	2	No	2	No	1	No	1	No	No;Yes;No;No;No;No;No;No;No	Symptomatic	Personal vehicle	Private	Never	No	Often	Yes	Non vegetarian	NV
840	0.076	0	Negative	Male	Student	32	Student	S	B+	B	Positive	No	No	No	No	No	No	Yes	Yes	Negative	No	No	No	No	No	No	No	No	No	No	0	No	0	No	0	No	0	No	No;No;No;No;No;No;No;No;No	Asymptomatic	Personal vehicle	Private	Never	No	Never	No	Non vegetarian	NV
841	0.063	0	Negative	Male	Staff	50	GOVT SERVANT	S	O+	O	Positive	No	No	No	No	No	No	No	No		No	No	No	No	No	No	No	No	No	No	0	No	0	No	0	No	0	No	No;No;No;No;No;No;No;No;No	Asymptomatic	Personal vehicle	Private	Never	No	Never	No	Vegetarian	V
842	0.096	0	Negative	Male	Staff	54	Govt. Servant	S	AB-	AB	Negative	No	No	No	No	No	No	Yes	Yes	Negative	No	No	No	No	No	No	No	No	No	No	1	No	0	No	0	No	0	No	No;No;No;No;No;No;No;No;No	Asymptomatic	Personal vehicle	Private	Never	No	Never	No	Occasionally non veg	NV
843	0.208	0	Negative	Male	Staff	38	GOVT. EMPLOYEE	S	AB+	AB	Positive	No	No	No	No	No	No	Yes	Yes	Negative	No	No	No	No	No	No	No	No	No	No	0	No	0	No	0	No	0	No	No;No;No;No;No;No;No;No;No	Asymptomatic	Personal vehicle	Private	Never	No	Never	No	Vegetarian	V
844	0.064	0	Negative	Male	Student	43	Asstt. Section Officer in CSIR-CDRI, Lucknow	S	B+	B	Positive	No	No	Yes	Yes	No	No	Yes	Yes	Negative	No	No	No	No	No	No	No	No	No	No	2	No	1	No	1	No	1	No	No;No;No;No;No;No;No;No;No	Asymptomatic	Personal vehicle	Private	Never	No	Never	No	Occasionally non veg	NV
845	0.066	0	Negative	Female	Staff	58	Service	S	A+	A	Positive	No	No	No	No	No	No	Yes	Yes	Negative	No	No	No	No	No	No	No	No	No	No	0	No	0	No	0	No	0	No	No;No;No;No;No;No;No;No;No	Asymptomatic	Personal vehicle	Private	Never	No	Never	No	Vegetarian	V
846	0.064	0	Negative	Male	Staff	26	JSA IN CSIR CDRI	S	B+	B	Positive	No	No	No	No	No	No	Yes	Yes	Negative	No	No	No	No	No	No	No	No	No	No	1	No	1	No	1	No	0	No	No;No;No;No;No;No;No;No;No	Asymptomatic	BIKE	Private	Never	No	Never	No	Occasionally non veg	NV
847	0.069	0	Negative	Male	Faculty	40	SENIOR SCIENTIST	S	B+	B	Positive	No	No	Yes	Yes	No	No	Yes	Yes	Negative	No	No	No	No	No	No	No	No	No	No	0	No	0	No	0	No	0	No	No;No;No;No;No;No;No;No;No	Asymptomatic	Personal vehicle	Private	Never	No	Never	No	Occasionally non veg	NV
848	0.063	0	Negative	Male	Faculty	34	Service	S	O+	O	Positive	No	No	No	No	No	No	Yes	Yes	Negative	No	No	No	No	No	No	No	No	No	No	0	No	0	No	0	No	0	No	No;No;No;No;No;No;No;No;No	Asymptomatic	Personal vehicle	Private	Never	No	Never	No	Vegetarian	V
849	0.064	0	Negative	Male	Faculty	41	Scientist	S	B+	B	Positive	No	No	Yes	Yes	No	No	No	No		No	No	No	No	Yes	Yes	No	No	No	No	2	No	2	No	1	No	0	No	No;No;Yes;No;No;No;No;No;No	Symptomatic	Personal vehicle	Private	Never	No	Occasionally	Occ	Non vegetarian	NV
850	0.064	0	Negative	Female	Student	33	research scholor	S	B+	B	Positive	No	No	No	No	No	No	Yes	Yes	Negative	No	No	No	No	No	No	No	No	No	No	1	No	1	No	1	No	0	No	No;No;No;No;No;No;No;No;No	Asymptomatic	Personal vehicle	Private	Never	No	Never	No	Non vegetarian	NV
851	0.063	0	Negative	Female	Staff	41	govt job	S	A+	A	Positive	No	No	No	No	No	No	Yes	Yes	Negative	No	No	No	No	No	No	No	No	No	No	0	No	0	No	0	No	0	No	No;No;No;No;No;No;No;No;No	Asymptomatic	Personal vehicle	Private	Never	No	Never	No	Occasionally non veg	NV
852	0.12	0	Negative	Female	Student	26	Junior Research Fellow	S	B+	B	Positive	No	No	No	No	No	No	Yes	Yes	Negative	No	No	No	No	No	No	No	No	No	No	2	No	2	No	4	Yes	0	No	No;No;No;No;No;No;No;Yes;No	Symptomatic	Personal vehicle	Private	Never	No	Never	No	Vegetarian	V
853	0.119	0	Negative	Male	Faculty	43	Govt Job	S	O+	O	Positive	No	No	No	No	No	No	No	No		No	No	No	No	No	No	No	No	No	No	1	No	1	No	0	No	0	No	No;No;No;No;No;No;No;No;No	Asymptomatic	Personal vehicle	Private	Never	No	Never	No	Occasionally non veg	NV
854	0.061	0	Negative	Male	Faculty	40	Research	S	B+	B	Positive	No	No	No	No	No	No	Yes	Yes	Negative	No	No	No	No	No	No	No	No	No	No	1	No	1	No	0	No	0	No	No;No;No;No;No;No;No;No;No	Asymptomatic	Personal vehicle	Private	Never	No	Never	No	Vegetarian	V
855	0.065	0	Negative	Male	Faculty	46	Scientist	S		SU	SU	No	No	No	No	No	No	Yes	Yes	Negative	No	No	No	No	No	No	No	No	No	No	1	No	1	No	1	No	1	No	No;No;No;No;No;No;No;No;No	Asymptomatic	Personal vehicle	Private	Never	No	Occasionally	Occ	Vegetarian	V
856	0.064	0	Negative	Male	Staff	56	Service govt.	S	B+	B	Positive	No	No	Yes	Yes	No	No	No	No		No	No	No	No	No	No	No	No	No	No	1	No	0	No	0	No	0	No	No;No;No;No;No;No;No;No;No	Asymptomatic	Personal vehicle	Private	Never	No	Occasionally	Occ	Vegetarian	V
857	0.099	0	Negative	Male	Staff	SU	Technical officer	S	B+	B	Positive	No	No	No	No	No	No	Yes	Yes	Negative	No	No	No	No	Yes	Yes	No	No	No	No	3	Yes	1	No	0	No	0	No	No;No;Yes;No;No;Yes;No;No;No	Symptomatic	Personal vehicle	Private	Never	No	Occasionally	Occ	Vegetarian	V
858	0.103	0	Negative	Female	Staff	45	DOCTOR	S	A+	A	Positive	No	No	No	No	No	No	No	No		No	No	No	No	No	No	No	No	No	No	2	No	1	No	3	Yes	0	No	No;No;No;No;No;No;No;Yes;No	Symptomatic	Personal vehicle	Private	Never	No	Never	No	Occasionally non veg	NV
859	0.063	0	Negative	Female	Staff	56	service	S	O+	O	Positive	No	No	No	No	No	No	No	No		No	No	No	No	No	No	No	No	No	No	0	No	0	No	0	No	0	No	No;No;No;No;No;No;No;No;No	Asymptomatic	Personal vehicle	Private	Never	No	Never	No	Vegetarian	V
860	0.066	0	Negative	Male	Student	30	research schlor	S	B+	B	Positive	No	No	No	No	No	No	Yes	Yes	Negative	No	No	No	No	No	No	No	No	No	No	0	No	0	No	0	No	0	No	No;No;No;No;No;No;No;No;No	Asymptomatic	Personal vehicle	Private	Never	No	Never	No	Vegetarian	V
861	0.063	0	Negative	SU		SU		SU		SU	SU		SU		SU		SU		SU			SU		SU		SU		SU		SU	Blank	SU	Blank	SU	Blank	SU	Blank	SU	SU;SU;SU;SU;SU;SU;SU;SU;SU	SU		Private		SU		SU		SU
862	0.062	0	Negative	Female	Staff	56	Lab tech	S	O+	O	Positive	No	No	No	No	No	No	No	No		No	No	No	No	No	No	No	No	No	No	0	No	0	No	0	No	0	No	No;No;No;No;No;No;No;No;No	Asymptomatic	Personal vehicle	Private	Never	No	Never	No	Vegetarian	V
863	0.065	0	Negative	Female	Faculty	41	SERVICE	S	A+	A	Positive	No	No	No	No	No	No	No	No		No	No	No	No	No	No	No	No	No	No	1	No	1	No	1	No	0	No	No;No;No;No;No;No;No;No;No	Asymptomatic	Personal vehicle	Private	Never	No	Never	No	Vegetarian	V
864	0.07	0	Negative	Male	Student	28	Research Fellow	S	A-	A	Negative	No	No	No	No	No	No	Yes	Yes	Negative	No	No	No	No	No	No	No	No	No	No	0	No	0	No	0	No	0	No	No;No;No;No;No;No;No;No;No	Asymptomatic	Personal vehicle	Private	Never	No	Never	No	Vegetarian	V
865	0.072	0	Negative	Female	Student	25	Project Assistant	S	AB+	AB	Positive	No	No	No	No	No	No	Yes	Yes	Negative	No	No	No	No	No	No	No	No	No	No	1	No	0	No	0	No	0	No	No;No;No;No;No;No;No;No;No	Asymptomatic	Personal vehicle	Private	Never	No	Never	No	Vegetarian	V
866	0.064	0	Negative	Female	Student	33	n-PDF	S	O-	O	Negative	No	No	No	No	No	No	Yes	Yes	Negative	No	No	No	No	No	No		SU		SU	1	No	0	No	0	No	0	No	No;No;No;SU;SU;No;No;No;No	Asymptomatic	Personal vehicle	Private	Never	No	Never	No	Vegetarian	V
867	0.067	0	Negative	Male	Student	29	Ph.D scholar	S	O+	O	Positive	No	No	No	No	No	No	Yes	Yes	Negative	No	No	No	No	No	No	No	No	No	No	1	No	0	No	3	Yes	0	No	No;No;No;No;No;No;No;Yes;No	Symptomatic	Personal vehicle	Private	Never	No	Never	No	Non vegetarian	NV
868	0.103	0	Negative	Male	Student	28	Research Scholar	S	B+	B	Positive	No	No	No	No	No	No	Yes	Yes	Negative	No	No	No	No	No	No	No	No	No	No	2	No	0	No	0	No	0	No	No;No;No;No;No;No;No;No;No	Asymptomatic	Personal vehicle	Private	Never	No	Never	No	Vegetarian	V
869	0.063	0	Negative	Male	Student	27	Research scholar	S	O+	O	Positive	No	No	No	No	No	No	Yes	Yes	Negative	No	No	No	No	No	No	No	No	No	No	0	No	0	No	0	No	0	No	No;No;No;No;No;No;No;No;No	Asymptomatic	Personal vehicle	Private	Never	No	Never	No	Occasionally non veg	NV
870	0.067	0	Negative	Male	Student	24	Ph.D Scholar	S	B+	B	Positive	No	No	No	No	No	No	No	No		Yes	Yes	No	No	No	No	No	No	No	No	3	Yes	2	No	3	Yes	0	No	Yes;No;No;No;No;Yes;No;Yes;No	Symptomatic	Personal vehicle	Private	Never	No	Never	No	Vegetarian	V
871	0.073	0	Negative	Female	Student	27	Senior Research Fellow	S	O+	O	Positive	No	No	No	No	No	No	Yes	Yes	Negative	No	No	No	No	No	No	No	No	No	No	1	No	1	No	0	No	0	No	No;No;No;No;No;No;No;No;No	Asymptomatic	Personal vehicle	Private	Never	No	Never	No	Occasionally non veg	NV
872	0.07	0	Negative	Male	Student	32	Student	S	A+	A	Positive	No	No	No	No	No	No	Yes	Yes	Negative	No	No	No	No	No	No	No	No	No	No	0	No	0	No	0	No	0	No	No;No;No;No;No;No;No;No;No	Asymptomatic	Personal vehicle	Private	Never	No	Never	No	Occasionally non veg	NV
873	0.069	0	Negative	Male	Student	29	STUDENT	S	B+	B	Positive	No	No	No	No	No	No	Yes	Yes	Negative	No	No	No	No	No	No	No	No	No	No	0	No	0	No	0	No	0	No	No;No;No;No;No;No;No;No;No	Asymptomatic	Personal vehicle	Private	Never	No	Never	No	Occasionally non veg	NV
874	0.066	0	Negative	Male	Staff	57	Technical staff	S	O+	O	Positive	No	No	No	No	No	No	Yes	Yes	Negative	No	No	No	No	Yes	Yes	No	No	No	No	1	No	0	No	0	No	0	No	No;No;Yes;No;No;No;No;No;No	Symptomatic	Personal vehicle	Private	Never	No	Never	No	Vegetarian	V
875	0.739	0	Negative	Male	Student	29	Research scholar	S	O+	O	Positive	No	No	No	No	No	No	No	No		No	No	No	No	No	No	No	No	No	No	2	No	2	No	2	No	2	No	No;No;No;No;No;No;No;No;No	Asymptomatic	Personal vehicle	Private	Regular	Yes	Never	No	Vegetarian	V
876	0.074	0	Negative	Male	Staff	27	Technical Assistant.	S	O+	O	Positive	No	No	No	No	No	No	Yes	Yes	Negative	No	No	No	No	Yes	Yes	No	No	No	No	1	No	1	No	0	No	0	No	No;No;Yes;No;No;No;No;No;No	Symptomatic	Personal vehicle	Private	Never	No	Never	No	Occasionally non veg	NV
877	0.067	0	Negative	Female	Student	32	STUDENT	S	B-	B	Negative	No	No	No	No	No	No	Yes	Yes	Negative	Yes	Yes	Yes	Yes	Yes	Yes	No	No	No	No	2	No	2	No	2	No	0	No	Yes;Yes;Yes;No;No;No;No;No;No	Symptomatic	Auto	Public	Never	No	Never	No	Occasionally non veg	NV
878	0.093	0	Negative	Male	Staff	56	Service	S	O+	O	Positive	No	No	Yes	Yes	No	No	Yes	Yes	Negative	No	No	No	No	No	No	No	No	No	No	0	No	0	No	0	No	0	No	No;No;No;No;No;No;No;No;No	Asymptomatic	Personal vehicle	Private	Never	No	Never	No	Non vegetarian	NV
879	0.067	0	Negative	Male	Student	32	STUDENT	S	B+	B	Positive	No	No	No	No	No	No	No	No		No	No	No	No	No	No	No	No	No	No	0	No	0	No	0	No	0	No	No;No;No;No;No;No;No;No;No	Asymptomatic	Personal vehicle	Private	Sporadic	Yes	Occasionally	Occ	Occasionally non veg	NV
880	0.064	0	Negative	Male	Staff	57	Service	S	O+	O	Positive	No	No	Yes	Yes	No	No	Yes	Yes	Negative	No	No	No	No	No	No	No	No	No	No	1	No	0	No	0	No	0	No	No;No;No;No;No;No;No;No;No	Asymptomatic	Personal vehicle	Private	Never	No	Never	No	Vegetarian	V
881	0.063	0	Negative	Female	Others	35	RESEARCH	S	B+	B	Positive	No	No	Yes	Yes	No	No	Yes	Yes	Negative	No	No	Yes	Yes	Yes	Yes	No	No	No	No	3	Yes	4	Yes	0	No	2	No	No;Yes;Yes;No;No;Yes;Yes;No;No	Symptomatic	Personal vehicle	Private	Sporadic	Yes	Never	No	Non vegetarian	NV
882	0.069	0	Negative	Male	Student	26	Student	S	O+	O	Positive	No	No	No	No	No	No	No	No		No	No	No	No	No	No	No	No	No	No	0	No	0	No	0	No	0	No	No;No;No;No;No;No;No;No;No	Asymptomatic	Personal vehicle	Private	Never	No	Occasionally	Occ	Occasionally non veg	NV
883	0.073	0	Negative	Male	Staff	52	TECHNICAL	S	B+	B	Positive	No	No	No	No	No	No	Yes	Yes	Negative	No	No	No	No	No	No	No	No	No	No	1	No	2	No	2	No	1	No	No;No;No;No;No;No;No;No;No	Asymptomatic	Personal vehicle	Private	Never	No	Never	No	Vegetarian	V
884	0.086	0	Negative	Female	Student	28	Phd scholAr	S	B+	B	Positive	No	No	No	No	No	No	Yes	Yes	Negative	No	No	No	No	No	No	No	No	No	No	1	No	0	No	0	No	0	No	No;No;No;No;No;No;No;No;No	Asymptomatic	Personal vehicle	Private	Never	No	Never	No	Vegetarian	V
885	0.138	0	Negative	Male	Student	31	Student	S	B+	B	Positive	No	No	No	No	No	No	Yes	Yes	Negative	No	No	No	No	No	No	No	No	No	No	3	Yes	0	No	0	No	0	No	No;No;No;No;No;Yes;No;No;No	Symptomatic	Personal vehicle	Private	Regular	Yes	Never	No	Non vegetarian	NV
886	0.069	0	Negative	Male	Faculty	47	Scientist	S	B+	B	Positive	No	No	No	No	No	No	No	No		No	No	No	No	No	No	No	No	No	No	0	No	0	No	0	No	0	No	No;No;No;No;No;No;No;No;No	Asymptomatic	Personal vehicle	Private	Sporadic	Yes	Occasionally	Occ	Vegetarian	V
887	0.064	0	Negative	Male	Student	30	RESEARCH SCHOLAR	S	O+	O	Positive	No	No	No	No	No	No	Yes	Yes	Negative	No	No	No	No	No	No	No	No	No	No	3	Yes	1	No	0	No	1	No	No;No;No;No;No;Yes;No;No;No	Symptomatic	Personal vehicle	Private	Never	No	Occasionally	Occ	Occasionally non veg	NV
888	0.065	0	Negative	Male	Staff	55	Govt. Servent	S	A+	A	Positive	Yes	Yes	No	No	No	No	Yes	Yes	Negative	No	No	No	No	No	No	No	No	No	No	0	No	0	No	0	No	0	No	No;No;No;No;No;No;No;No;No	Asymptomatic	Personal vehicle	Private	Never	No	Never	No	Vegetarian	V
889	0.071	0	Negative	Male	Staff	44	Service	S	AB+	AB	Positive	No	No	No	No	No	No	Yes	Yes	Negative	No	No	No	No	No	No	No	No	No	No	1	No	0	No	0	No	0	No	No;No;No;No;No;No;No;No;No	Asymptomatic	Personal vehicle	Private	Never	No	Never	No	Vegetarian	V
890	0.066	0	Negative	Male	Staff	55	SERVICE	S	A+	A	Positive	Yes	Yes	No	No	No	No	Yes	Yes	Negative	No	No	No	No	No	No	No	No	No	No	2	No	0	No	0	No	0	No	No;No;No;No;No;No;No;No;No	Asymptomatic	Personal vehicle	Private	Never	No	Never	No	Occasionally non veg	NV
891	0.068	0	Negative	Male	Staff	36	TECHNICAL OFFICER	S	O+	O	Positive	No	No	No	No	No	No	No	No		No	No	No	No	No	No	No	No	No	No	2	No	1	No	0	No	0	No	No;No;No;No;No;No;No;No;No	Asymptomatic	Personal vehicle	Private	Never	No	Never	No	Occasionally non veg	NV
892	0.069	0	Negative	Male	Faculty	58	Scientist	S	AB+	AB	Positive	No	No	No	No	No	No	Yes	Yes	Negative	No	No	No	No	No	No	No	No	No	No	3	Yes	1	No	0	No	0	No	No;No;No;No;No;Yes;No;No;No	Symptomatic	Personal vehicle	Private	Never	No	Never	No	Vegetarian	V
893	0.067	0	Negative	Male	Staff	58	Sr. Principal Scientist	S	A+	A	Positive	Yes	Yes	No	No	No	No	Yes	Yes	Negative	No	No	No	No	No	No	No	No	No	No	0	No	0	No	0	No	0	No	No;No;No;No;No;No;No;No;No	Asymptomatic	Personal vehicle	Private	Sporadic	Yes	Occasionally	Occ	Occasionally non veg	NV
894	0.064	0	Negative	Male	Staff	60	Government Servant.	S	B+	B	Positive	Yes	Yes	Yes	Yes	Yes	Yes	Yes	Yes	Negative	No	No	No	No	No	No	No	No	No	No	1	No	0	No	0	No	0	No	No;No;No;No;No;No;No;No;No	Asymptomatic	Personal vehicle	Private	Never	No	Occasionally	Occ	Occasionally non veg	NV
895	0.064	0	Negative	Male	Staff	38	Govt Service	S	B+	B	Positive	No	No	No	No	No	No	No	No		No	No	No	No	No	No	No	No	No	No	1	No	0	No	0	No	0	No	No;No;No;No;No;No;No;No;No	Asymptomatic	Personal vehicle	Private	Never	No	Never	No	Non vegetarian	NV
896	0.072	0	Negative	Female	Contractual Staff	31	Library send information science professional	S	B+	B	Positive	No	No	No	No	No	No	Yes	Yes	Negative	No	No	No	No	No	No	No	No	No	No	1	No	0	No	2	No	0	No	No;No;No;No;No;No;No;No;No	Asymptomatic	Personal vehicle	Private	Never	No	Never	No	Non vegetarian	NV
897	0.081	0	Negative	SU		SU		SU		SU	SU		SU		SU		SU		SU			SU		SU		SU		SU		SU	Blank	SU	Blank	SU	Blank	SU	Blank	SU	SU;SU;SU;SU;SU;SU;SU;SU;SU	SU		Private		SU		SU		SU
898	0.066	0	Negative	Male	Staff	56	Service	S	B+	B	Positive	No	No	Yes	Yes	No	No	Yes	Yes	Negative	Yes	Yes	Yes	Yes	Yes	Yes	No	No	No	No	1	No	0	No	0	No	1	No	Yes;Yes;Yes;No;No;No;No;No;No	Symptomatic	Personal vehicle	Private	Never	No	Never	No	Vegetarian	V
899	0.07	0	Negative	Female	Staff	41	CSIR Employee	S	A+	A	Positive	No	No	No	No	No	No	Yes	Yes	Negative	No	No	No	No	Yes	Yes	No	No	No	No	1	No	2	No	1	No	0	No	No;No;Yes;No;No;No;No;No;No	Symptomatic	Personal vehicle	Private	Never	No	Never	No	Non vegetarian	NV
900	0.064	0	Negative	Male	Staff	49	CSIR Service	S	B+	B	Positive	No	No	Yes	Yes	No	No	Yes	Yes	Negative	No	No	No	No	No	No	No	No	No	No	0	No	0	No	0	No	0	No	No;No;No;No;No;No;No;No;No	Asymptomatic	Personal vehicle	Private	Never	No	Never	No	Vegetarian	V
901	0.067	0	Negative	Female	Student	23	Student	S	A+	A	Positive	No	No	No	No	No	No	Yes	Yes	Negative	No	No	No	No	No	No	No	No	No	No	0	No	0	No	0	No	0	No	No;No;No;No;No;No;No;No;No	Asymptomatic	Personal vehicle	Private	Never	No	Never	No	Non vegetarian	NV
902	0.066	0	Negative	Female	Student	25	Student	S	O+	O	Positive	No	No	No	No	No	No	Yes	Yes	Negative	No	No	No	No	No	No	No	No	No	No	0	No	0	No	0	No	0	No	No;No;No;No;No;No;No;No;No	Asymptomatic	Personal vehicle	Private	Never	No	Never	No	Vegetarian	V
903	0.071	0	Negative	Female	Staff	40	Staff nurse at dispensary	S	B+	B	Positive	No	No	No	No	No	No	No	No		No	No	No	No	No	No	No	No	No	No	1	No	0	No	1	No	0	No	No;No;No;No;No;No;No;No;No	Asymptomatic	Personal vehicle	Private	Never	No	Never	No	Vegetarian	V
904	0.068	0	Negative	Male	Staff	57	GOVERNMENT SERVICE	S	B+	B	Positive	No	No	Yes	Yes	No	No	No	No		No	No	No	No	No	No	No	No	No	No	0	No	0	No	0	No	0	No	No;No;No;No;No;No;No;No;No	Asymptomatic	Auto	Public	Never	No	Often	Yes	Occasionally non veg	NV
905	0.065	0	Negative	Male	Faculty	50	scientist	S		SU	SU	Yes	Yes	Yes	Yes	No	No	Yes	Yes	Negative	No	No	No	No	No	No	No	No	No	No	0	No	0	No	0	No	0	No	No;No;No;No;No;No;No;No;No	Asymptomatic	Personal vehicle	Private	Never	No	Occasionally	Occ	Occasionally non veg	NV
906	0.074	0	Negative	Male	Staff	59	GOVERNMENT SERVICE	S	B-	B	Negative	No	No	No	No	No	No	No	No		No	No	No	No	No	No	No	No	No	No	0	No	0	No	0	No	0	No	No;No;No;No;No;No;No;No;No	Asymptomatic	Personal vehicle	Private	Regular	Yes	Occasionally	Occ	Occasionally non veg	NV
907	0.071	0	Negative	Male	Staff	29	government job	S	AB+	AB	Positive	No	No	No	No	No	No	No	No		Yes	Yes	Yes	Yes	Yes	Yes	No	No	No	No	5	Yes	0	No	0	No	2	No	Yes;Yes;Yes;No;No;Yes;No;No;No	Symptomatic	Personal vehicle	Private	Never	No	Never	No	Vegetarian	V
908	0.069	0	Negative	Male	Contractual Staff	24	Pharmacist	S	A+	A	Positive	No	No	No	No	No	No	No	No		No	No	No	No	No	No	No	No	No	No	1	No	1	No	1	No	0	No	No;No;No;No;No;No;No;No;No	Asymptomatic	Personal vehicle	Private	Never	No	Never	No	Non vegetarian	NV
909	0.069	0	Negative	Female	Student	27	student	S	B+	B	Positive	No	No	No	No	No	No	No	No		No	No	No	No	No	No		SU		SU	0	No	0	No	0	No	0	No	No;No;No;SU;SU;No;No;No;No	Asymptomatic	Personal vehicle	Private	Never	No	Never	No	Vegetarian	V
910	0.067	0	Negative	Male	Student	30	Research Associate	S	A+	A	Positive	No	No	No	No	No	No	No	No		No	No	No	No	No	No	No	No		SU	0	No	0	No	0	No	0	No	No;No;No;No;SU;No;No;No;No	Asymptomatic	Personal vehicle	Private	Never	No	Never	No	Occasionally non veg	NV
911	0.065	0	Negative	Male	Staff	59	GOVERNMENT SERVICE	S	A+	A	Positive	Yes	Yes	Yes	Yes	No	No	No	No		No	No	No	No	No	No	No	No	No	No	0	No	0	No	0	No	0	No	No;No;No;No;No;No;No;No;No	Asymptomatic	Personal vehicle	Private	Never	No	Never	No	Vegetarian	V
912	0.066	0	Negative	Male	Staff	46	Govt. Employee	S	A+	A	Positive	No	No	Yes	Yes	No	No	No	No		No	No	No	No	No	No	No	No	No	No	0	No	0	No	0	No	0	No	No;No;No;No;No;No;No;No;No	Asymptomatic	Personal vehicle	Private	Never	No	Never	No	Vegetarian	V
913	0.07	0	Negative	Male	Staff	59	Govt. Service	S	O+	O	Positive	Yes	Yes	No	No	No	No	No	No		No	No	No	No	No	No	No	No	No	No	3	Yes	1	No	0	No	0	No	No;No;No;No;No;Yes;No;No;No	Symptomatic	Personal vehicle	Private	Never	No	Never	No	Occasionally non veg	NV
914	0.08	0	Negative	Male	Staff	52	Government Services.	S	A+	A	Positive	No	No	Yes	Yes	No	No	No	No		No	No	No	No	No	No	No	No	No	No	1	No	0	No	0	No	0	No	No;No;No;No;No;No;No;No;No	Asymptomatic	Personal vehicle	Private	Never	No	Never	No	Occasionally non veg	NV
915	0.094	0	Negative	Female	Student	29	CSIR-SRF	S	O+	O	Positive	No	No	No	No	No	No	Yes	Yes		No	No	No	No	No	No	No	No	No	No	1	No	1	No	0	No	0	No	No;No;No;No;No;No;No;No;No	Asymptomatic	I walk on foot from my hostel to lab. For official purposes, I use institutional vehicle.	Private	Never	No	Never	No	Occasionally non veg	NV
916	0.077	0	Negative	Female	Faculty	46	Scientist	S	O+	O	Positive	Yes	Yes	No	No	No	No	Yes	Yes	Negative	No	No	No	No	No	No	No	No	No	No	1	No	1	No	1	No	0	No	No;No;No;No;No;No;No;No;No	Asymptomatic	Personal vehicle	Private	Never	No	Never	No	Vegetarian	V
917	0.064	0	Negative	Male	Staff	46	Service	S	O+	O	Positive	No	No	No	No	No	No	Yes	Yes	Negative	No	No	No	No	No	No	No	No	No	No	1	No	1	No	0	No	0	No	No;No;No;No;No;No;No;No;No	Asymptomatic	Personal vehicle	Private	Never	No	Occasionally	Occ	Non vegetarian	NV
918	0.068	0	Negative	Male	Student	30	PhD student	S	B-	B	Negative	No	No	No	No	No	No	Yes	Yes	Negative	No	No	No	No	No	No	No	No	No	No	1	No	1	No	1	No	0	No	No;No;No;No;No;No;No;No;No	Asymptomatic	Personal vehicle	Private	Never	No	Never	No	Vegetarian	V
919	0.066	0	Negative	Female	Student	30	Research scholar	S	AB+	AB	Positive	No	No	No	No	No	No	Yes	Yes	Negative	No	No	No	No	No	No	No	No	No	No	2	No	0	No	1	No	0	No	No;No;No;No;No;No;No;No;No	Asymptomatic	Personal vehicle	Private	Never	No	Never	No	Non vegetarian	NV
920	0.068	0	Negative	Male	Staff	41	cdri employee	S	O+	O	Positive	No	No	No	No	No	No	Yes	Yes	Negative	No	No	No	No	No	No	No	No	No	No	0	No	0	No	0	No	0	No	No;No;No;No;No;No;No;No;No	Asymptomatic	Personal vehicle	Private	Never	No	Never	No	Vegetarian	V
921	0.068	0	Negative	Male	Staff	57	Service	S	B+	B	Positive	Yes	Yes	No	No	No	No	Yes	Yes	Negative	No	No	No	No	No	No	No	No	No	No	2	No	1	No	0	No	2	No	No;No;No;No;No;No;No;No;No	Asymptomatic	Personal vehicle	Private	Never	No	Never	No	Occasionally non veg	NV
922	0.242	0	Negative	Female	Staff	36	Government Servent	S		SU	SU	Yes	Yes	No	No	No	No	No	No		No	No	No	No	No	No	No	No	No	No	4	Yes	0	No	0	No	0	No	No;No;No;No;No;Yes;No;No;No	Symptomatic	Personal vehicle	Private	Never	No	Occasionally	Occ	Vegetarian	V
923	0.069	0	Negative	Female	Student	28	Research Scholar, PhD	S	B+	B	Positive	No	No	No	No	No	No	No	No		No	No	No	No	No	No	No	No	No	No	0	No	0	No	0	No	0	No	No;No;No;No;No;No;No;No;No	Asymptomatic	Personal vehicle	Private	Never	No	Never	No	Occasionally non veg	NV
924	0.069	0	Negative	Male	Student	24	Research Scholar PhD	S	O+	O	Positive	No	No	No	No	No	No	No	No		No	No	No	No	No	No	No	No	No	No	0	No	0	No	0	No	0	No	No;No;No;No;No;No;No;No;No	Asymptomatic	Personal vehicle	Private	Never	No	Occasionally	Occ	Occasionally non veg	NV
925	0.066	0	Negative	Male	Student	29	Student	S	O+	O	Positive	No	No	No	No	No	No	No	No		No	No	Yes	Yes	No	No	No	No	No	No	2	No	1	No	2	No	1	No	No;Yes;No;No;No;No;No;No;No	Symptomatic	Personal vehicle	Private	Sporadic	Yes	Occasionally	Occ	Occasionally non veg	NV
926	0.069	0	Negative	Male	Faculty	42	Government Employee	S	O+	O	Positive	No	No	No	No	No	No	No	No		No	No	No	No	No	No	No	No	No	No	0	No	1	No	0	No	0	No	No;No;No;No;No;No;No;No;No	Asymptomatic	Personal vehicle	Private	Never	No	Never	No	Non vegetarian	NV
927	0.067	0	Negative	Male	Faculty	47	RESEARCH SCIENTIST	S		SU	SU	No	No	No	No	No	No	Yes	Yes	Negative	Yes	Yes	Yes	Yes	No	No	No	No	No	No	2	No	0	No	0	No	0	No	Yes;Yes;No;No;No;No;No;No;No	Symptomatic	Personal vehicle	Private	Never	No	Never	No	Non vegetarian	NV
928	0.066	0	Negative	Male	Staff	49	service	S	O+	O	Positive	No	No	No	No	Yes	Yes	No	No		No	No	No	No	No	No	No	No	No	No	0	No	0	No	0	No	0	No	No;No;No;No;No;No;No;No;No	Asymptomatic	Personal vehicle	Private	Never	No	Occasionally	Occ	Occasionally non veg	NV
929	0.069	0	Negative	Female	Staff	46	Technical staff	S	O+	O	Positive	No	No	No	No	No	No	Yes	Yes	Negative	No	No	No	No	No	No	No	No	No	No	0	No	1	No	1	No	0	No	No;No;No;No;No;No;No;No;No	Asymptomatic	Personal vehicle	Private	Never	No	Never	No	Vegetarian	V
930	0.066	0	Negative	Female	Student	31	Senior Research Fellow	S	A+	A	Positive	No	No	No	No	No	No	No	No		No	No	No	No	No	No	No	No	No	No	2	No	1	No	1	No	0	No	No;No;No;No;No;No;No;No;No	Asymptomatic	Personal vehicle	Private	Never	No	Never	No	Occasionally non veg	NV
931	0.063	0	Negative	Male	Student	27	Student	S	B+	B	Positive	No	No	No	No	No	No	No	No		No	No	No	No	No	No	No	No	No	No	1	No	1	No	1	No	0	No	No;No;No;No;No;No;No;No;No	Asymptomatic	walking	Private	Never	No	Never	No	Occasionally non veg	NV
932	0.065	0	Negative	Male	Student	29	Student	S	O+	O	Positive	No	No	No	No	No	No	Yes	Yes	Negative	No	No	No	No	No	No	No	No	No	No	2	No	0	No	0	No	0	No	No;No;No;No;No;No;No;No;No	Asymptomatic	walking	Private	Never	No	Never	No	Occasionally non veg	NV
933	0.067	0	Negative	Male	Student	30	JRF	S	B+	B	Positive	No	No	No	No	No	No	Yes	Yes	Negative	No	No	No	No	No	No	No	No	No	No	3	Yes	0	No	1	No	1	No	No;No;No;No;No;Yes;No;No;No	Symptomatic	Public transport	Public	Never	No	Never	No	Occasionally non veg	NV
934	0.264	0	Negative	Female	Student	30	PhD Scholar	S	B+	B	Positive	No	No	No	No	No	No	Yes	Yes	Negative	No	No	No	No	No	No	No	No	No	No	1	No	0	No	0	No	0	No	No;No;No;No;No;No;No;No;No	Asymptomatic	Personal vehicle	Private	Never	No	Never	No	Vegetarian	V
935	1.8	1	Positive	Male	Staff	52	Senior Technician	S	B+	B	Positive	Yes	Yes	No	No	No	No	No	No		No	No	No	No	No	No	No	No	No	No	0	No	0	No	0	No	0	No	No;No;No;No;No;No;No;No;No	Asymptomatic	Personal vehicle	Private	Sporadic	Yes	Occasionally	Occ	Non vegetarian	NV
936	0.067	0	Negative	Male	Student	26	PHD	S	B+	B	Positive	No	No	No	No	No	No	No	No		No	No	No	No	No	No	No	No	No	No	1	No	1	No	1	No	0	No	No;No;No;No;No;No;No;No;No	Asymptomatic	Personal vehicle	Private	Never	No	Never	No	Non vegetarian	NV
937	0.068	0	Negative	Male	Student	31	student	S	A+	A	Positive	No	No	No	No	No	No	Yes	Yes	Negative	No	No	No	No	No	No	No	No	No	No	1	No	0	No	0	No	0	No	No;No;No;No;No;No;No;No;No	Asymptomatic	Personal vehicle	Private	Never	No	Never	No	Non vegetarian	NV
938	0.07	0	Negative	Female	Student	32	Research scholar	S	B+	B	Positive	No	No	No	No	No	No	No	No		No	No	No	No	No	No	No	No	No	No	1	No	0	No	1	No	0	No	No;No;No;No;No;No;No;No;No	Asymptomatic	Personal vehicle	Private	Never	No	Never	No	Vegetarian	V
939	0.068	0	Negative	Female	Faculty	39	Scientist	S	A+	A	Positive	No	No	No	No	No	No	Yes	Yes	Negative	No	No	No	No	No	No	No	No	No	No	3	Yes	0	No	1	No	0	No	No;No;No;No;No;Yes;No;No;No	Symptomatic	Personal vehicle	Private	Never	No	Never	No	Vegetarian	V
940	0.18	0	Negative	Female	Staff	38	Service	S	AB+	AB	Positive	No	No	No	No	No	No	No	No		No	No	No	No	No	No	No	No	No	No	1	No	1	No	1	No	0	No	No;No;No;No;No;No;No;No;No	Asymptomatic	walk	Private	Never	No	Never	No	Vegetarian	V
941	0.066	0	Negative	Female	Student	32	STUDENT	S	A+	A	Positive	No	No	No	No	No	No	No	No		No	No	No	No	No	No	No	No	No	No	1	No	1	No	2	No	0	No	No;No;No;No;No;No;No;No;No	Asymptomatic	Cab	Public	Never	No	Never	No	Vegetarian	V
942	0.065	0	Negative	Female	Student	31	Research Scholar	S	A+	A	Positive	No	No	No	No	No	No	No	No		No	No	No	No	No	No	No	No	No	No	1	No	0	No	0	No	0	No	No;No;No;No;No;No;No;No;No	Asymptomatic	Personal vehicle	Private	Never	No	Never	No	Vegetarian	V
943	0.062	0	Negative	Male	Student	28	student	S	B+	B	Positive	No	No	No	No	No	No	Yes	Yes	Negative	No	No	No	No	No	No	No	No	No	No	1	No	0	No	0	No	0	No	No;No;No;No;No;No;No;No;No	Asymptomatic	Personal vehicle	Private	Never	No	Occasionally	Occ	Occasionally non veg	NV
944	0.068	0	Negative	Male	Contractual Staff	SU	Job	S	O+	O	Positive	No	No	No	No	No	No	Yes	Yes	Negative	No	No	No	No	No	No	No	No	No	No	0	No	0	No	0	No	0	No	No;No;No;No;No;No;No;No;No	Asymptomatic	Personal vehicle	Private	Never	No	Never	No	Vegetarian	V
945	0.065	0	Negative	Female	Faculty	44	scientist	S	B+	B	Positive	No	No	No	No	No	No	No	No		No	No	Yes	Yes	Yes	Yes	No	No	No	No	1	No	1	No	1	No	0	No	No;Yes;Yes;No;No;No;No;No;No	Symptomatic	Personal vehicle	Private	Never	No	Never	No	Occasionally non veg	NV
946	104.3	1	Positive	Male	Staff	60	Principal Technical Officer	S	B+	B	Positive	No	No	Yes	Yes	No	No	Yes	Yes	Negative	No	No	No	No	No	No	No	No	No	No	2	No	0	No	0	No	2	No	No;No;No;No;No;No;No;No;No	Asymptomatic	Personal vehicle	Private	Never	No	Occasionally	Occ	Occasionally non veg	NV
947	0.069	0	Negative	Male	Staff	53	Govt Job	S	B+	B	Positive	No	No	Yes	Yes	No	No	Yes	Yes	Negative	No	No	No	No	No	No	No	No	No	No	0	No	0	No	0	No	0	No	No;No;No;No;No;No;No;No;No	Asymptomatic	Personal vehicle	Private	Never	No	Never	No	Occasionally non veg	NV
948	0.08	0	Negative	Male	Staff	54	Job	S	O+	O	Positive	No	No	No	No	Yes	Yes	No	No		No	No	No	No	No	No	No	No	No	No	0	No	0	No	0	No	0	No	No;No;No;No;No;No;No;No;No	Asymptomatic	Personal vehicle	Private	Never	No	Never	No	Vegetarian	V
949	0.068	0	Negative	Male	Staff	52	SERVICE	S	B+	B	Positive	No	No	No	No	No	No	Yes	Yes	Negative	No	No	No	No	No	No	No	No	No	No	0	No	0	No	0	No	0	No	No;No;No;No;No;No;No;No;No	Asymptomatic	Personal vehicle	Private	Sporadic	Yes	Occasionally	Occ	Occasionally non veg	NV
950	0.066	0	Negative	Male	Others	31	Student	S	AB+	AB	Positive	No	No	No	No	No	No	No	No		No	No	No	No	No	No	No	No	No	No	1	No	0	No	0	No	0	No	No;No;No;No;No;No;No;No;No	Asymptomatic	Personal vehicle	Private	Never	No	Never	No	Occasionally non veg	NV
951	0.061	0	Negative	Male	Staff	33	govt employee	S	O+	O	Positive	No	No	No	No	No	No	No	No		No	No	No	No	No	No	No	No	No	No	0	No	0	No	0	No	0	No	No;No;No;No;No;No;No;No;No	Asymptomatic	Personal vehicle	Private	Never	No	Never	No	Non vegetarian	NV
952	0.063	0	Negative	Male	Faculty	43	Scientist	S	O+	O	Positive	No	No	Yes	Yes	No	No	No	No		No	No	No	No	No	No	No	No	No	No	0	No	0	No	0	No	0	No	No;No;No;No;No;No;No;No;No	Asymptomatic	Personal vehicle	Private	Never	No	Never	No	Non vegetarian	NV
953	0.065	0	Negative	Male	Student	31	Research Scholar	S	O+	O	Positive	No	No	No	No	No	No	No	No		No	No	No	No	No	No	No	No	No	No	0	No	0	No	0	No	0	No	No;No;No;No;No;No;No;No;No	Asymptomatic	Personal vehicle	Private	Never	No	Never	No	Occasionally non veg	NV
954	136.8	1	Positive	Male	Staff	40	Govt. Employee	S	AB+	AB	Positive	Yes	Yes	No	No	No	No	No	No		No	No	No	No	No	No	No	No	No	No	0	No	0	No	0	No	0	No	No;No;No;No;No;No;No;No;No	Asymptomatic	Personal vehicle	Private	Sporadic	Yes	Occasionally	Occ	Occasionally non veg	NV
955	0.074	0	Negative	Male	Faculty	42	Scientist	S	A+	A	Positive	Yes	Yes	No	No	No	No	Yes	Yes	Negative	No	No	No	No	No	No	No	No	No	No	2	No	0	No	0	No	0	No	No;No;No;No;No;No;No;No;No	Asymptomatic	Personal vehicle	Private	Never	No	Never	No	Vegetarian	V
956	0.069	0	Negative	Male	Staff	59	govt govt	S	A+	A	Positive	No	No	No	No	No	No	No	No		No	No	No	No	No	No	No	No	No	No	0	No	0	No	0	No	0	No	No;No;No;No;No;No;No;No;No	Asymptomatic	Personal vehicle	Private	Sporadic	Yes	Often	Yes	Non vegetarian	NV
957	0.063	0	Negative	Male	Student	30	STUDENT	S	B+	B	Positive	No	No	No	No	No	No	No	No		No	No	No	No	No	No	No	No	No	No	0	No	0	No	0	No	0	No	No;No;No;No;No;No;No;No;No	Asymptomatic	Personal vehicle	Private	Never	No	Never	No	Vegetarian	V
958	93.63	1	Positive	Male	Staff	57	Service	S	B+	B	Positive	Yes	Yes	Yes	Yes	Yes	Yes	No	No		No	No	No	No	No	No	No	No	No	No	4	Yes	3	Yes	0	No	0	No	No;No;No;No;No;Yes;Yes;No;No	Symptomatic	Personal vehicle	Private	Never	No	Never	No	Non vegetarian	NV
959	0.068	0	Negative	Male	Staff	SU	GOVERNMENT SERVICE	S	B-	B	Negative	No	No	No	No	No	No	No	No		No	No	Yes	Yes	No	No	No	No	No	No	0	No	0	No	0	No	0	No	No;Yes;No;No;No;No;No;No;No	Symptomatic	Personal vehicle	Private	Never	No	Occasionally	Occ	Occasionally non veg	NV
960	0.078	0	Negative	Male	Staff	41	SERVICE	S	A+	A	Positive	No	No	Yes	Yes	No	No	Yes	Yes	Negative	No	No	No	No	No	No	No	No	No	No	0	No	0	No	0	No	0	No	No;No;No;No;No;No;No;No;No	Asymptomatic	Personal vehicle	Private	Never	No	Never	No	Occasionally non veg	NV
961	0.07	0	Negative	Male	Faculty	42	Peincipal Scientist At CDRI as detailed earlier.	S	B+	B	Positive	No	No	No	No	No	No	No	No		No	No	No	No	No	No	No	No	No	No	0	No	0	No	0	No	0	No	No;No;No;No;No;No;No;No;No	Asymptomatic	Personal vehicle	Private	Never	No	Never	No	Vegetarian	V
962	0.068	0	Negative	Male	Staff	47	Service	S	O+	O	Positive	No	No	No	No	No	No	No	No		No	No	No	No	No	No	No	No	No	No	0	No	0	No	0	No	0	No	No;No;No;No;No;No;No;No;No	Asymptomatic	Personal vehicle	Private	Never	No	Occasionally	Occ	Non vegetarian	NV
963	0.07	0	Negative	Male	Staff	49	Govt. Employee	S	O+	O	Positive	No	No	Yes	Yes	No	No	No	No		No	No	No	No	No	No	No	No	No	No	1	No	0	No	0	No	0	No	No;No;No;No;No;No;No;No;No	Asymptomatic	Personal vehicle	Private	Never	No	Never	No	Vegetarian	V
964	0.069	0	Negative	Male	Student	23	Research Scholar	S	O+	O	Positive	No	No	No	No	No	No	Yes	Yes	Negative	No	No	No	No	No	No	No	No	No	No	1	No	1	No	0	No	0	No	No;No;No;No;No;No;No;No;No	Asymptomatic	Personal vehicle	Private	Never	No	Never	No	Vegetarian	V
965	0.142	0	Negative	Male	Faculty	50	Scientist	S	O+	O	Positive	No	No	No	No	No	No	Yes	Yes	Negative	No	No	No	No	No	No	No	No	No	No	0	No	0	No	0	No	0	No	No;No;No;No;No;No;No;No;No	Asymptomatic	Personal vehicle	Private	Never	No	Never	No	Vegetarian	V
966	0.074	0	Negative	Female	Student	30	PhD. student	S	B+	B	Positive	No	No	No	No	No	No	Yes	Yes	Negative	No	No	No	No	No	No	No	No	No	No	2	No	2	No	2	No	0	No	No;No;No;No;No;No;No;No;No	Asymptomatic	Personal vehicle	Private	Never	No	Never	No	Vegetarian	V
967	0.068	0	Negative	Female	Student	26	Junior Research fellow	S	O+	O	Positive	No	No	No	No	No	No	Yes	Yes	Negative	No	No	No	No	No	No	No	No	No	No	2	No	3	Yes	1	No	0	No	No;No;No;No;No;No;Yes;No;No	Symptomatic	by walk	Private	Never	No	Never	No	Vegetarian	V
968	0.068	0	Negative	Female	Student	31	Research Scholar	S	B+	B	Positive	No	No	No	No	No	No	No	No		No	No	No	No	No	No	No	No	No	No	0	No	0	No	0	No	0	No	No;No;No;No;No;No;No;No;No	Asymptomatic	Personal vehicle	Private	Never	No	Never	No	Vegetarian	V
969	0.074	0	Negative	Male	Staff	36	Govt. Employee	S	B+	B	Positive	No	No	No	No	No	No	Yes	Yes	Negative	No	No	No	No	No	No	No	No	No	No	0	No	0	No	0	No	0	No	No;No;No;No;No;No;No;No;No	Asymptomatic	Personal vehicle	Private	Never	No	Never	No	Vegetarian	V
970	0.089	0	Negative	Female	Student	29	Research Scholar	S	B+	B	Positive	No	No	No	No	No	No	Yes	Yes	Negative	No	No	No	No	No	No	No	No	No	No	0	No	0	No	0	No	0	No	No;No;No;No;No;No;No;No;No	Asymptomatic	Personal vehicle	Private	Never	No	Never	No	Non vegetarian	NV
971	0.07	0	Negative	Male	Student	25	CSIR-JRF	S	O+	O	Positive	No	No	No	No	No	No	Yes	Yes	Negative	No	No	No	No	No	No	No	No	No	No	0	No	0	No	0	No	0	No	No;No;No;No;No;No;No;No;No	Asymptomatic	Personal vehicle	Private	Sporadic	Yes	Occasionally	Occ	Occasionally non veg	NV
972	27.52	1	Positive	Male	Student	27	Research Scholar	S	O+	O	Positive	No	No	No	No	No	No	Yes	Yes	Negative	No	No	No	No	No	No	No	No	No	No	0	No	0	No	0	No	0	No	No;No;No;No;No;No;No;No;No	Asymptomatic	Personal vehicle	Private	Never	No	Never	No	Non vegetarian	NV
973	0.092	0	Negative	Male	Staff	46	JOB	S	AB+	AB	Positive	Yes	Yes	Yes	Yes	No	No	No	No		No	No	No	No	No	No	No	No	No	No	3	Yes	3	Yes	0	No	0	No	No;No;No;No;No;Yes;Yes;No;No	Symptomatic	Personal vehicle	Private	Sporadic	Yes	Occasionally	Occ	Vegetarian	V
974	0.066	0	Negative	Female	Student	31	PhD research scholar	S	B+	B	Positive	No	No	No	No	No	No	Yes	Yes	Negative	No	No	No	No	No	No	No	No	No	No	0	No	0	No	0	No	0	No	No;No;No;No;No;No;No;No;No	Asymptomatic	Personal vehicle	Private	Never	No	Never	No	Vegetarian	V
975	0.064	0	Negative	Male	Student	32	Researcher	S	O+	O	Positive	No	No	No	No	No	No	No	No		No	No	No	No	No	No	No	No	No	No	1	No	0	No	1	No	0	No	No;No;No;No;No;No;No;No;No	Asymptomatic	Personal vehicle	Private	Never	No	Never	No	Occasionally non veg	NV
976	0.231	0	Negative	Male	Student	27	Student	S	B+	B	Positive	No	No	No	No	No	No	No	No		No	No	No	No	No	No	No	No	No	No	1	No	1	No	1	No	0	No	No;No;No;No;No;No;No;No;No	Asymptomatic	Personal vehicle	Private	Never	No	Never	No	Occasionally non veg	NV
977	0.173	0	Negative	Female	Student	25	student	S	A+	A	Positive	No	No	No	No	No	No	Yes	Yes	Negative	No	No	No	No	No	No	No	No	No	No	1	No	0	No	0	No	0	No	No;No;No;No;No;No;No;No;No	Asymptomatic	Auto	Public	Sporadic	Yes	Occasionally	Occ	Occasionally non veg	NV
978	0.094	0	Negative	Male	Others	35	Researcher	S	A+	A	Positive	No	No	No	No	No	No	Yes	Yes	Negative	No	No	No	No	No	No	No	No	No	No	1	No	1	No	0	No	0	No	No;No;No;No;No;No;No;No;No	Asymptomatic	Personal vehicle	Private	Never	No	Never	No	Vegetarian	V
979	0.067	0	Negative	Female	Student	28	Ph.D.	S	O+	O	Positive	No	No	No	No	No	No	Yes	Yes	Negative	No	No	No	No	No	No	No	No	No	No	3	Yes	1	No	1	No	0	No	No;No;No;No;No;Yes;No;No;No	Symptomatic	Personal vehicle	Private	Never	No	Occasionally	Occ	Occasionally non veg	NV
980	0.07	0	Negative	Female	Faculty	52	Scientist	S	B+	B	Positive	No	No	No	No	No	No	No	No		No	No	No	No	No	No	No	No	No	No	1	No	0	No	0	No	1	No	No;No;No;No;No;No;No;No;No	Asymptomatic	Personal vehicle	Private	Never	No	Occasionally	Occ	Non vegetarian	NV
981	0.066	0	Negative	Female	Student	28	student	S	B+	B	Positive	No	No	No	No	No	No	No	No		No	No	No	No	No	No	No	No	No	No	2	No	2	No	0	No	0	No	No;No;No;No;No;No;No;No;No	Asymptomatic	Personal vehicle	Private	Never	No	Never	No	Vegetarian	V
982	0.067	0	Negative	Female	Student	26	Research Scholar	S	B+	B	Positive	No	No	No	No	No	No	No	No		Yes	Yes	No	No	No	No	No	No	No	No	0	No	0	No	0	No	1	No	Yes;No;No;No;No;No;No;No;No	Symptomatic	Personal vehicle	Private	Never	No	Occasionally	Occ	Occasionally non veg	NV
983	0.081	0	Negative	Female	Student	28	Student	S	AB+	AB	Positive	No	No	No	No	No	No	Yes	Yes	Negative	No	No	No	No	No	No	No	No	No	No	4	Yes	3	Yes	4	Yes	2	No	No;No;No;No;No;Yes;Yes;Yes;No	Symptomatic	Public transport	Public	Never	No	Never	No	Vegetarian	V
984	0.083	0	Negative	Male	Faculty	40	Scientist	S	B+	B	Positive	No	No	No	No	No	No	No	No		No	No	No	No	No	No	No	No	No	No	0	No	0	No	0	No	0	No	No;No;No;No;No;No;No;No;No	Asymptomatic	Personal vehicle	Private	Never	No	Occasionally	Occ	Vegetarian	V
985	0.071	0	Negative	Male	Faculty	48	Academic Research	S	O+	O	Positive	No	No	No	No	No	No	Yes	Yes	Negative	No	No	No	No	No	No	No	No	No	No	1	No	0	No	0	No	0	No	No;No;No;No;No;No;No;No;No	Asymptomatic	Personal vehicle	Private	Never	No	Never	No	Vegetarian	V
986	0.105	0	Negative	Male	Student	24	student	S	A+	A	Positive	No	No	No	No	No	No	Yes	Yes	Negative	Yes	Yes	Yes	Yes	No	No	No	No	No	No	3	Yes	5	Yes	0	No	0	No	Yes;Yes;No;No;No;Yes;Yes;No;No	Symptomatic	walk	Private	Never	No	Never	No	Vegetarian	V
987	0.184	0	Negative	Female	Student	30	RESEARCHER	S	B+	B	Positive	No	No	No	No	No	No	Yes	Yes	Negative	No	No	No	No	No	No	No	No	No	No	3	Yes	1	No	0	No	1	No	No;No;No;No;No;Yes;No;No;No	Symptomatic	Personal vehicle	Private	Never	No	Never	No	Vegetarian	V
988	0.126	0	Negative	Male	Staff	45	Senior Technical Officer	S	B+	B	Positive	No	No	No	No	No	No	Yes	Yes	Negative	No	No	Yes	Yes	No	No		SU	No	No	2	No	1	No	1	No	2	No	No;Yes;No;SU;No;No;No;No;No	Symptomatic	Personal vehicle	Private	Never	No	Never	No	Vegetarian	V
989	0.069	0	Negative	Male	Student	31	STUDENT	S	B+	B	Positive	No	No	No	No	No	No	No	No		No	No	No	No	No	No	No	No	No	No	1	No	0	No	1	No	0	No	No;No;No;No;No;No;No;No;No	Asymptomatic	Personal vehicle	Private	Sporadic	Yes	Occasionally	Occ	Vegetarian	V
990	0.068	0	Negative	Male	Faculty	35	Scientist	S	O+	O	Positive	No	No	No	No	No	No	Yes	Yes	Negative	No	No	No	No	No	No	No	No	No	No	0	No	0	No	0	No	0	No	No;No;No;No;No;No;No;No;No	Asymptomatic	Personal vehicle	Private	Never	No	Never	No	Non vegetarian	NV
991	0.095	0	Negative	Male	Faculty	45	Principal Scientist	S	B+	B	Positive	No	No	No	No	No	No	No	No		No	No	No	No	No	No	No	No	No	No	0	No	0	No	0	No	0	No	No;No;No;No;No;No;No;No;No	Asymptomatic	Personal vehicle	Private	Never	No	Never	No	Non vegetarian	NV
992	100.4	1	Positive	Male	Faculty	49	Research	S	B+	B	Positive	No	No	No	No	No	No	Yes	Yes	Negative	Yes	Yes	No	No	No	No	No	No	No	No	5	Yes	4	Yes	2	No	0	No	Yes;No;No;No;No;Yes;Yes;No;No	Symptomatic	Personal vehicle	Private	Sporadic	Yes	Occasionally	Occ	Vegetarian	V
993	36.67	1	Positive	Female	Faculty	58	Service	S	B+	B	Positive	Yes	Yes	Yes	Yes	No	No	Yes	Yes	Negative	Yes	Yes	No	No	No	No	No	No	No	No	4	Yes	1	No	0	No	0	No	Yes;No;No;No;No;Yes;No;No;No	Symptomatic	Personal vehicle	Private	Never	No	Never	No	Occasionally non veg	NV
994	0.073	0	Negative	Male	Faculty	50	Senior Scientist	S	B+	B	Positive	Yes	Yes	No	No	No	No	Yes	Yes	Negative	No	No	No	No	No	No	No	No	No	No	1	No	0	No	0	No	0	No	No;No;No;No;No;No;No;No;No	Asymptomatic	Personal vehicle	Private	Never	No	Never	No	Vegetarian	V
995	0.074	0	Negative	Male	Staff	31	Technical officer	S	B+	B	Positive	No	No	No	No	No	No	No	No		No	No	No	No	No	No	No	No	No	No	0	No	0	No	0	No	0	No	No;No;No;No;No;No;No;No;No	Asymptomatic	Personal vehicle	Private	Never	No	Never	No	Vegetarian	V
996	0.073	0	Negative	Male	Student	30	Research scholar	S	B+	B	Positive	No	No	No	No	No	No	Yes	Yes	Negative	No	No	No	No	No	No	No	No	No	No	0	No	0	No	0	No	0	No	No;No;No;No;No;No;No;No;No	Asymptomatic	Personal vehicle	Private	Never	No	Occasionally	Occ	Vegetarian	V
997	0.078	0	Negative	Female	Student	33	Research scholar	S	AB-	AB	Negative	No	No	No	No	No	No	Yes	Yes	Negative	No	No	No	No	No	No	No	No	No	No	0	No	0	No	0	No	0	No	No;No;No;No;No;No;No;No;No	Asymptomatic	Personal vehicle	Private	Never	No	Never	No	Non vegetarian	NV
998	0.057	0	Negative	Male	Faculty	59	SCIENTIST	S	AB(+)ve	AB	Positive	No	No	Yes	Yes	No	No	No	No		No	No	No	No	No	No	No	No	No	No	1	No	0	No	0	No	0	No	No;No;No;No;No;No;No;No;No	Asymptomatic	Personal vehicle	Private	Never	No	Never	No	Occasionally non veg	NV
999	0.066	0	Negative	Male	Faculty	55	SCIENTIST	S	O(+)ve	O	Positive	No	No	No	No	No	No	No	No		No	No	No	No	No	No	No	No	No	No	2	No	0	No	0	No	0	No	No;No;No;No;No;No;No;No;No	Asymptomatic	Personal vehicle	Private	Never	No	Never	No	Vegetarian	V
1000	0.063	0	Negative	Female	Faculty	53	scientist	S		SU	SU	No	No	No	No	No	No	No	No		No	No	No	No	No	No	No	No	No	No	2	No	0	No	0	No	0	No	No;No;No;No;No;No;No;No;No	Asymptomatic	Personal vehicle	Private	Never	No	Never	No	Vegetarian	V
1001	2.09	1	Positive	Male	Staff	45	Administrator officer	S		SU	SU	No	No	No	No	No	No	No	No		No	No	No	No	No	No		SU		SU	0	No	0	No	0	No	0	No	No;No;No;SU;SU;No;No;No;No	Asymptomatic	Personal vehicle	Private	Never	No	Never	No	Non vegetarian	NV
1002	0.061	0	Negative	Female	Staff	40	Staff	S	O(+)ve	O	Positive	No	No	No	No	No	No	No	No		No	No	No	No	No	No	No	No	No	No	1	No	1	No	1	No	0	No	No;No;No;No;No;No;No;No;No	Asymptomatic	Personal vehicle	Private	Never	No	Never	No	Non vegetarian	NV
1003	0.066	0	Negative	Male	Staff	34	Scientist	S	A+	A	Positive	No	No	No	No	No	No	No	No		No	No	No	No	No	No	No	No	No	No	0	No	0	No	0	No	0	No	No;No;No;No;No;No;No;No;No	Asymptomatic	Personal vehicle	Private	Never	No	Never	No	Non vegetarian	NV
1004	0.066	0	Negative	Male	Faculty	41	Scientist	S	O+	O	Positive	No	No	No	No	No	No	No	No		No	No	No	No	No	No	No	No	No	No	1	No	1	No	0	No	0	No	No;No;No;No;No;No;No;No;No	Asymptomatic	Personal vehicle	Private	Never	No	Never	No	Vegetarian	V
1005	0.064	0	Negative	Male	Staff	45	Employee-Govt Sector	S	O+	O	Positive	No	No	No	No	No	No	No	No		No	No	No	No	Yes	Yes	No	No	No	No	1	No	1	No	2	No	0	No	No;No;Yes;No;No;No;No;No;No	Symptomatic	Personal vehicle	Private	Never	No	Never	No	Occasionally non veg	NV
1006	0.063	0	Negative	Female	Staff	56	Senior Principal Scientist	S	B+	B	Positive	Yes	Yes	No	No	No	No	No	No		No	No	No	No	No	No	No	No	No	No	1	No	0	No	0	No	0	No	No;No;No;No;No;No;No;No;No	Asymptomatic	Personal vehicle	Private	Never	No	Never	No	Vegetarian	V
1007	0.064	0	Negative	Male	Staff	43	SENIOR TECHNICIAN	S	O+	O	Positive	No	No	No	No	No	No	No	No		No	No	No	No	No	No	No	No	No	No	1	No	1	No	1	No	0	No	No;No;No;No;No;No;No;No;No	Asymptomatic	Personal vehicle	Private	Never	No	Never	No	Vegetarian	V
1008	0.065	0	Negative	Male	Staff	40	Staff	S	O(-)ve	O	Negative	No	No	No	No	No	No	No	No		No	No	No	No	No	No	No	No	No	No	1	No	1	No	0	No	0	No	No;No;No;No;No;No;No;No;No	Asymptomatic	Personal vehicle	Private	Never	No	Never	No	Non vegetarian	NV
1009	0.065	0	Negative	Male	Faculty	32	Scientist	S	O+	O	Positive	No	No	No	No	No	No	No	No		No	No	No	No	No	No	No	No	No	No	0	No	0	No	0	No	0	No	No;No;No;No;No;No;No;No;No	Asymptomatic	Personal vehicle	Private	Never	No	Never	No	Non vegetarian	NV
1010	0.066	0	Negative	Male	Faculty	33	Scientist	S	O+	O	Positive	No	No	No	No	No	No	No	No		No	No	No	No	No	No	No	No	No	No	1	No	0	No	0	No	0	No	No;No;No;No;No;No;No;No;No	Asymptomatic	Personal vehicle	Private	Never	No	Never	No	Occasionally non veg	NV
1011	120.9	1	Positive	Male	Staff	48	ELECTRICAL	S	O(+)ve	O	Positive	No	No	No	No	No	No	No	No		No	No	No	No	No	No		SU		SU	0	No	0	No	0	No	0	No	No;No;No;SU;SU;No;No;No;No	Asymptomatic	Personal vehicle	Private	Never	No	Never	No	Non vegetarian	NV
1012	0.071	0	Negative	Male	Student	27	PROJECT ASSISTANT	S	A+	A	Positive	No	No	No	No	No	No	No	No		No	No	No	No	No	No	No	No	No	No	0	No	0	No	0	No	0	No	No;No;No;No;No;No;No;No;No	Asymptomatic	Personal vehicle	Private	Never	No	Never	No	Non vegetarian	NV
1013	0.066	0	Negative	Male	Contractual Staff	24	PROJECT ASSISTANT	S	B(+)ve	B	Positive	No	No	No	No	No	No	No	No		No	No	No	No	No	No		SU		SU	0	No	0	No	0	No	0	No	No;No;No;SU;SU;No;No;No;No	Asymptomatic	Personal vehicle	Private	Never	No	Never	No	Non vegetarian	NV
1014	0.067	0	Negative	Male	Student	23	PROJECT ASSOCIATE	S	B(+)ve	B	Positive	No	No	No	No	No	No	No	No		No	No	No	No	No	No		SU		SU	0	No	0	No	0	No	0	No	No;No;No;SU;SU;No;No;No;No	Asymptomatic	Personal vehicle	Private	Never	No	Never	No	Non vegetarian	NV
1015	0.066	0	Negative	Male	Contractual Staff	24	PROJECT ASSISTANT	S	B(+)ve	B	Positive	No	No	No	No	No	No	No	No		No	No	No	No	No	No	No	No	No	No	2	No	0	No	0	No	0	No	No;No;No;No;No;No;No;No;No	Asymptomatic	Personal vehicle	Private	Never	No	Never	No	Occasionally non veg	NV
1016	0.067	0	Negative	Male	Others	32	Researcher	S	O+	O	Positive	No	No	No	No	No	No	No	No		Yes	Yes	Yes	Yes	Yes	Yes	No	No	No	No	0	No	1	No	2	No	0	No	Yes;Yes;Yes;No;No;No;No;No;No	Symptomatic	Personal vehicle	Private	Never	No	Occasionally	Occ	Vegetarian	V
1017	0.06	0	Negative	Male	Student	24	STUDENT	S	B-	B	Negative	No	No	No	No	No	No	No	No		No	No	No	No	No	No		SU		SU	0	No	0	No	0	No	0	No	No;No;No;SU;SU;No;No;No;No	Asymptomatic	Personal vehicle	Private	Never	No	Never	No	Non vegetarian	NV
1018	0.064	0	Negative	Male	Student	35	SRF	S	A(+)ve	A	Positive	No	No	No	No	No	No	No	No		No	No	No	No	No	No	No	No	No	No	2	No	0	No	0	No	0	No	No;No;No;No;No;No;No;No;No	Asymptomatic	Personal vehicle	Private	Never	No	Never	No	Vegetarian	V
1019	0.062	0	Negative	Male	Others	24	project assistant	S	B(+)ve	B	Positive	No	No	No	No	No	No	No	No		No	No	No	No	No	No		SU		SU	0	No	0	No	0	No	0	No	No;No;No;SU;SU;No;No;No;No	Asymptomatic	Personal vehicle	Private	Never	No	Never	No	Non vegetarian	NV
1020	24.93	1	Positive	Male	Student	29	Project Associate-1	S	O+	O	Positive	No	No	No	No	No	No	No	No		No	No	Yes	Yes	No	No	Yes	Yes	No	No	1	No	1	No	0	No	0	No	No;Yes;No;Yes;No;No;No;No;No	Symptomatic	Personal vehicle	Private	Never	No	Occasionally	Occ	Occasionally non veg	NV
1021	0.066	0	Negative	Male	Staff	37	SCIENTIST	S	O(+)ve	O	Positive	No	No	No	No	No	No	No	No		No	No	No	No	No	No	No	No	No	No	2	No	0	No	0	No	0	No	No;No;No;No;No;No;No;No;No	Asymptomatic	Personal vehicle	Private	Never	No	Never	No	Occasionally non veg	NV
1022	0.066	0	Negative	Female	Student	28	Student	S	O+	O	Positive	No	No	No	No	No	No	No	No		No	No	No	No	No	No	No	No	No	No	1	No	0	No	2	No	0	No	No;No;No;No;No;No;No;No;No	Asymptomatic	Personal vehicle	Private	Never	No	Never	No	Occasionally non veg	NV
1023	0.062	0	Negative	Male	Faculty	40	Scientist	S	B+	B	Positive	No	No	No	No	No	No	No	No		No	No	No	No	No	No	No	No	No	No	0	No	0	No	1	No	0	No	No;No;No;No;No;No;No;No;No	Asymptomatic	Personal vehicle	Private	Never	No	Never	No	Occasionally non veg	NV
1024	0.068	0	Negative	Male	Staff	42	scientist	S	O(+)ve	O	Positive	No	No	No	No	No	No	No	No		No	No	No	No	No	No	No	No	No	No	2	No	0	No	0	No	0	No	No;No;No;No;No;No;No;No;No	Asymptomatic	Personal vehicle	Private	Never	No	Never	No	Occasionally non veg	NV
1025	0.652	0	Negative	Male	Staff	31	TA	S	O+	O	Positive	No	No	No	No	No	No	No	No		No	No	No	No	No	No	No	No	No	No	3	Yes	1	No	0	No	0	No	No;No;No;No;No;Yes;No;No;No	Symptomatic	Personal vehicle	Private	Never	No	Never	No	Occasionally non veg	NV
1026	0.918	0	Negative	Female	Student	26	JRF	S	O+	O	Positive	No	No	No	No	No	No	No	No		No	No	No	No	No	No	No	No	No	No	1	No	0	No	0	No	0	No	No;No;No;No;No;No;No;No;No	Asymptomatic	Personal vehicle	Private	Never	No	Never	No	Non vegetarian	NV
1027	0.072	0	Negative	Male	Staff	29	SENIOR TECHNICAL ASSISTANT	S	B(-)ve	B	Negative	No	No	No	No	No	No	No	No		No	No	No	No	No	No	No	No	No	No	0	No	0	No	0	No	0	No	No;No;No;No;No;No;No;No;No	Asymptomatic	Personal vehicle	Private	Never	No	Never	No	Non vegetarian	NV
1028	0.067	0	Negative	Male	Staff	29	Staff	S	O(+)ve	O	Positive	No	No	No	No	No	No	No	No		No	No	No	No	No	No	No	No	No	No	1	No	1	No	1	No	0	No	No;No;No;No;No;No;No;No;No	Asymptomatic	Personal vehicle	Private	Never	No	Never	No	Non vegetarian	NV
1029	0.103	0	Negative	Male	Staff	50	DRIVER	S	O(+)ve	O	Positive	Yes	Yes	No	No	No	No	No	No		No	No	No	No	No	No		SU		SU	0	No	0	No	0	No	0	No	No;No;No;SU;SU;No;No;No;No	Asymptomatic	Personal vehicle	Private	Never	No	Never	No	Non vegetarian	NV
1030	0.061	0	Negative	Male	Staff	54	Principal Scientist	S	O+	O	Positive	No	No	No	No	No	No	No	No		No	No	No	No	No	No	No	No	No	No	0	No	0	No	0	No	0	No	No;No;No;No;No;No;No;No;No	Asymptomatic	Personal vehicle	Private	Never	No	Never	No	Occasionally non veg	NV
1031	0.061	0	Negative	Male	Staff	29	Govt. Servant	S	B+	B	Positive	No	No	No	No	No	No	No	No		No	No	No	No	No	No	No	No	No	No	0	No	0	No	0	No	0	No	No;No;No;No;No;No;No;No;No	Asymptomatic	Personal vehicle	Private	Never	No	Never	No	Non vegetarian	NV
1032	0.063	0	Negative	Male	Staff	35	Govt Servant	S	B+	B	Positive	No	No	No	No	No	No	No	No		No	No	No	No	No	No	No	No	No	No	0	No	0	No	0	No	0	No	No;No;No;No;No;No;No;No;No	Asymptomatic	Personal vehicle	Private	Sporadic	Yes	Occasionally	Occ	Vegetarian	V
1033	0.067	0	Negative	Female	Faculty	36	Scientist	S	O+	O	Positive	No	No	No	No	No	No	No	No		No	No	No	No	No	No	No	No	No	No	0	No	0	No	1	No	0	No	No;No;No;No;No;No;No;No;No	Asymptomatic	Personal vehicle	Private	Never	No	Never	No	Occasionally non veg	NV
1034	0.066	0	Negative	Female	Staff	36	Sr.Sect. Assistant	S	B+	B	Positive	No	No	No	No	No	No	No	No		No	No	No	No	No	No	No	No	No	No	0	No	0	No	0	No	0	No	No;No;No;No;No;No;No;No;No	Asymptomatic	Personal vehicle	Private	Never	No	Never	No	Occasionally non veg	NV
1035	0.063	0	Negative	Male	Staff	34	BEARER	S	O(+)ve	O	Positive	No	No	No	No	No	No	No	No		No	No	No	No	No	No		SU		SU	0	No	0	No	0	No	0	No	No;No;No;SU;SU;No;No;No;No	Asymptomatic	Personal vehicle	Private	Never	No	Never	No	Non vegetarian	NV
1036	0.065	0	Negative	Male	Staff	50	SENIOR TECHNICAL OFFICER	S	O(+)ve	O	Positive	Yes	Yes	No	No	No	No	No	No		No	No	No	No	No	No	No	No		SU	0	No	0	No	0	No	0	No	No;No;No;No;SU;No;No;No;No	Asymptomatic	Personal vehicle	Private	Never	No	Never	No	Non vegetarian	NV
1037	0.068	0	Negative	Male	Staff	67	electrician(pensioner)	S		SU	SU	No	No	No	No	No	No	No	No		No	No	No	No	No	No		SU		SU	0	No	0	No	0	No	0	No	No;No;No;SU;SU;No;No;No;No	Asymptomatic	Personal vehicle	Private	Never	No	Never	No	Vegetarian	V
1038	19.73	1	Positive	Female	Staff	50	SENIOR TECHNICAL OFFICER	S	B(+)ve	B	Positive	No	No	Yes	Yes	No	No	No	No		No	No	No	No	No	No		SU		SU	0	No	0	No	0	No	0	No	No;No;No;SU;SU;No;No;No;No	Asymptomatic	Personal vehicle	Private	Never	No	Never	No	Non vegetarian	NV
1039	0.063	0	Negative	Male	Staff	47	technical officer	S	AB(+)ve	AB	Positive	No	No	No	No	No	No	No	No		No	No	No	No	No	No		SU		SU	0	No	0	No	0	No	0	No	No;No;No;SU;SU;No;No;No;No	Asymptomatic	Personal vehicle	Private	Never	No	Never	No	Non vegetarian	NV
1040	0.117	0	Negative	Male	Staff	50	SCIENTIST	S	O(+)ve	O	Positive	Yes	Yes	No	No	No	No	No	No		No	No	No	No	No	No		SU		SU	0	No	0	No	0	No	0	No	No;No;No;SU;SU;No;No;No;No	Asymptomatic	Personal vehicle	Private	Never	No	Never	No	Vegetarian	V
1041	0.063	0	Negative	Male	Faculty	42	Scientist	S	B+	B	Positive	No	No	No	No	No	No	No	No		No	No	No	No	No	No	No	No	No	No	2	No	1	No	1	No	0	No	No;No;No;No;No;No;No;No;No	Asymptomatic	Personal vehicle	Private	Never	No	Never	No	Occasionally non veg	NV
1042	0.063	0	Negative	Male	Contractual Staff	40	X-TECHNICIAN	OS	AB(+)ve	AB	Positive	No	No	No	No	No	No	No	No		No	No	No	No	No	No		SU		SU	0	No	0	No	0	No	0	No	No;No;No;SU;SU;No;No;No;No	Asymptomatic	Personal vehicle	Private	Never	No	Never	No	Non vegetarian	NV
1043	1.03	1	Positive	Female	Contractual Staff	40	PHYSIOTHERAPIST	S	B(+)ve	B	Positive	No	No	No	No	No	No	No	No		No	No	No	No	No	No		SU		SU	0	No	0	No	0	No	0	No	No;No;No;SU;SU;No;No;No;No	Asymptomatic	Personal vehicle	Private	Never	No	Never	No	Non vegetarian	NV
1044	122.6	1	Positive	SU		SU		SU		SU	SU		SU		SU		SU		SU			SU		SU		SU		SU		SU	Blank	SU	Blank	SU	Blank	SU	Blank	SU	SU;SU;SU;SU;SU;SU;SU;SU;SU	SU		Private		SU		SU		SU
1045	0.068	0	Negative	Female	Staff	39	STAFF NURSE	S	AB(+)ve	AB	Positive	No	No	No	No	No	No	No	No		No	No	No	No	No	No		SU		SU	0	No	0	No	0	No	0	No	No;No;No;SU;SU;No;No;No;No	Asymptomatic	Personal vehicle	Private	Never	No	Never	No	Non vegetarian	NV
1046	0.117	0	Negative	Male	Staff	58	SCIENTIST	S	O(+)ve	O	Positive	Yes	Yes	No	No	No	No	No	No		No	No	No	No	No	No		SU		SU	0	No	0	No	0	No	0	No	No;No;No;SU;SU;No;No;No;No	Asymptomatic	Personal vehicle	Private	Never	No	Never	No	Vegetarian	V
1047	0.063	0	Negative	Female	Student	29	Research Scholar	S	B+	B	Positive	No	No	No	No	No	No	No	No		Yes	Yes	Yes	Yes	No	No	May be	Yes	May be	Yes	2	No	3	Yes	4	Yes	0	No	Yes;Yes;No;Yes;Yes;No;Yes;Yes;No	Symptomatic	Personal vehicle	Private	Never	No	Never	No	Occasionally non veg	NV
1048	7.43	1	Positive	Male	Student	25	PROJECT ASSISTANT	S		SU	SU	No	No	No	No	No	No	No	No		No	No	No	No	No	No		SU		SU	0	No	0	No	0	No	0	No	No;No;No;SU;SU;No;No;No;No	Asymptomatic	Personal vehicle	Private	Never	No	Never	No	Non vegetarian	NV
1049	0.063	0	Negative	Female	Contractual Staff	46	CONTRACT STAF	OS	A(+)ve	A	Positive	No	No	No	No	No	No	No	No		No	No	No	No	No	No		SU		SU	0	No	0	No	0	No	0	No	No;No;No;SU;SU;No;No;No;No	Asymptomatic	Personal vehicle	Private	Never	No	Never	No	Non vegetarian	NV
1050	0.065	0	Negative	Male	Staff	40	SCIENTIST	S	O(+)ve	O	Positive	No	No	No	No	No	No	No	No		No	No	No	No	No	No		SU		SU	0	No	0	No	0	No	0	No	No;No;No;SU;SU;No;No;No;No	Asymptomatic	Personal vehicle	Private	Never	No	Never	No	Non vegetarian	NV
1051	0.065	0	Negative	Female	Staff	59	SCIENTIST	S	A(+)ve	A	Positive	No	No	No	No	No	No	No	No		No	No	No	No	No	No		SU		SU	0	No	0	No	0	No	0	No	No;No;No;SU;SU;No;No;No;No	Asymptomatic	Personal vehicle	Private	Never	No	Never	No	Non vegetarian	NV
1052	0.063	0	Negative	Male	Others	62	PENSIONER(SCIENTIST)	S	A(+)ve	A	Positive	No	No	No	No	No	No	No	No		No	No	No	No	No	No		SU		SU	0	No	0	No	0	No	0	No	No;No;No;SU;SU;No;No;No;No	Asymptomatic	Personal vehicle	Private	Never	No	Never	No	Non vegetarian	NV
1053	0.071	0	Negative	Male	Staff	36	scientist	S	A(+)ve	A	Positive	No	No	No	No	No	No	No	No		No	No	No	No	No	No		SU		SU	0	No	0	No	0	No	0	No	No;No;No;SU;SU;No;No;No;No	Asymptomatic	Personal vehicle	Private	Never	No	Never	No	Non vegetarian	NV
1054	0.076	0	Negative	Male	Others	43	Principal Scientist	S	B+	B	Positive	No	No	No	No	No	No	No	No		No	No	No	No	No	No	No	No	No	No	1	No	0	No	0	No	0	No	No;No;No;No;No;No;No;No;No	Asymptomatic	Personal vehicle	Private	Never	No	Never	No	Occasionally non veg	NV
1055	0.062	0	Negative	Male	Staff	37	SCIENTIST	S	O(+)ve	O	Positive	No	No	No	No	No	No	No	No		No	No	No	No	No	No	No	No		SU	0	No	0	No	0	No	0	No	No;No;No;No;SU;No;No;No;No	Asymptomatic	Personal vehicle	Private	Never	No	Never	No	Non vegetarian	NV
1056	0.067	0	Negative	Male	Staff	43	SCIENTIST	S	B(+)ve	B	Positive	No	No	No	No	No	No	No	No		No	No	No	No	No	No		SU		SU	0	No	0	No	0	No	0	No	No;No;No;SU;SU;No;No;No;No	Asymptomatic	Personal vehicle	Private	Never	No	Never	No	Vegetarian	V
1057	0.062	0	Negative	Female	Contractual Staff	32	STAFF NURSE	S	O(+)ve	O	Positive	No	No	No	No	No	No	No	No		No	No	No	No	No	No	No	No	No	No	0	No	0	No	0	No	0	No	No;No;No;No;No;No;No;No;No	Asymptomatic	Auto	Public	Never	No	Never	No	Non vegetarian	NV
1058	0.073	0	Negative	Male	Others	60	PART TIME MEDICAL OFFICER	S	A(+)ve	A	Positive	No	No	Yes	Yes	No	No	No	No		No	No	No	No	No	No		SU		SU	0	No	0	No	0	No	0	No	No;No;No;SU;SU;No;No;No;No	Asymptomatic	Personal vehicle	Private	Never	No	Never	No	Vegetarian	V
1059	0.069	0	Negative	Male	Staff	45	SCIENTIST	S	B(+)ve	B	Positive	No	No	No	No	No	No	No	No		No	No	No	No	No	No		SU		SU	0	No	0	No	0	No	0	No	No;No;No;SU;SU;No;No;No;No	Asymptomatic	Personal vehicle	Private	Never	No	Never	No	Occasionally non veg	NV
1060	0.062	0	Negative	Male	Student	24	PROJECT ASSOCIATE	S	A(+)ve	A	Positive	No	No	No	No	No	No	No	No		No	No	No	No	No	No		SU		SU	0	No	0	No	0	No	0	No	No;No;No;SU;SU;No;No;No;No	Asymptomatic	Personal vehicle	Private	Never	No	Never	No	Vegetarian	V
1061	5.74	1	Positive	Female	Others	50	HOUSE WIFE	S	B(+)ve	B	Positive	Yes	Yes	No	No	No	No	No	No		No	No	No	No	No	No		SU		SU	0	No	0	No	0	No	0	No	No;No;No;SU;SU;No;No;No;No	Asymptomatic	Personal vehicle	Private	Never	No	Never	No	Non vegetarian	NV
1062	160.7	1	Positive	Female	Others	22	NIL	S	B(+)ve	B	Positive	No	No	No	No	No	No	No	No		No	No	No	No	No	No		SU		SU	0	No	0	No	0	No	0	No	No;No;No;SU;SU;No;No;No;No	Asymptomatic	Personal vehicle	Private	Never	No	Never	No	Non vegetarian	NV
1063	0.065	0	Negative	Male	Staff	54	SECTION OFFICER (F&A)	S	O+	O	Positive	Yes	Yes	No	No	No	No	No	No		No	No	No	No	No	No	No	No	No	No	0	No	0	No	1	No	0	No	No;No;No;No;No;No;No;No;No	Asymptomatic	Personal vehicle	Private	Never	No	Never	No	Vegetarian	V
1064	0.064	0	Negative	Female	Others	31	HOUSE WIFE	S	A(+)ve	A	Positive	No	No	No	No	No	No	No	No		No	No	No	No	No	No		SU		SU	0	No	0	No	0	No	0	No	No;No;No;SU;SU;No;No;No;No	Asymptomatic	Personal vehicle	Private	Never	No	Never	No	Non vegetarian	NV
1065	0.331	0	Negative	Male	Contractual Staff	34	CIVIL(CONTRACT)	OS	B(+)ve	B	Positive	No	No	No	No	No	No	No	No		No	No	No	No	No	No		SU		SU	0	No	0	No	0	No	0	No	No;No;No;SU;SU;No;No;No;No	Asymptomatic	Personal vehicle	Private	Never	No	Never	No	Occasionally non veg	NV
1066	0.065	0	Negative	Male	Contractual Staff	SU	CIVIL(CONTRACT)	OS		SU	SU	No	No	No	No	No	No	No	No		No	No	No	No	No	No		SU		SU	0	No	0	No	0	No	0	No	No;No;No;SU;SU;No;No;No;No	Asymptomatic	Personal vehicle	Private	Never	No	Never	No	Non vegetarian	NV
1067	0.063	0	Negative	Male	Contractual Staff	28	CIVIL (CONTRACT)	OS		SU	SU	No	No	No	No	No	No	No	No		No	No	No	No	No	No		SU		SU	0	No	0	No	0	No	0	No	No;No;No;SU;SU;No;No;No;No	Asymptomatic	Personal vehicle	Private	Never	No	Never	No	Occasionally non veg	NV
1068	0.064	0	Negative	Male	Contractual Staff	52	CIVIL(CONTRACT)	OS		SU	SU	No	No	No	No	No	No	No	No		No	No	No	No	No	No		SU		SU	0	No	0	No	0	No	0	No	No;No;No;SU;SU;No;No;No;No	Asymptomatic	Personal vehicle	Private	Never	No	Never	No	Non vegetarian	NV
1069	0.143	0	Negative	Male	Contractual Staff	49	CIVIL(CONTRACT)	OS		SU	SU	No	No	No	No	No	No	No	No		No	No	No	No	No	No		SU		SU	0	No	0	No	0	No	0	No	No;No;No;SU;SU;No;No;No;No	Asymptomatic	Personal vehicle	Private	Never	No	Never	No	Non vegetarian	NV
1070	0.069	0	Negative	Male	Contractual Staff	19	app	S		SU	SU	No	No	No	No	No	No	No	No		No	No	No	No	No	No		SU		SU	0	No	0	No	0	No	0	No	No;No;No;SU;SU;No;No;No;No	Asymptomatic	Personal vehicle	Private	Never	No	Never	No	Non vegetarian	NV
1071	0.067	0	Negative	Male	Contractual Staff	23	civil(contract)	OS		SU	SU	No	No	No	No	No	No	No	No		No	No	No	No	No	No		SU		SU	0	No	0	No	0	No	0	No	No;No;No;SU;SU;No;No;No;No	Asymptomatic	Personal vehicle	Private	Never	No	Never	No	Occasionally non veg	NV
1072	0.063	0	Negative	Male	Contractual Staff	20	CIVIL(CONTRACT)	OS		SU	SU	No	No	No	No	No	No	No	No		No	No	No	No	No	No		SU		SU	0	No	0	No	0	No	0	No	No;No;No;SU;SU;No;No;No;No	Asymptomatic	Personal vehicle	Private	Never	No	Never	No	Non vegetarian	NV
1073	0.063	0	Negative	Male	Staff	30	Staff	S		SU	SU	No	No	No	No	No	No	No	No		No	No	No	No	No	No	No	No	No	No	1	No	1	No	0	No	0	No	No;No;No;No;No;No;No;No;No	Asymptomatic	Personal vehicle	Private	Never	No	Never	No	Non vegetarian	NV
1074	0.065	0	Negative	Male	Student	24	student	S	A+	A	Positive	No	No	No	No	No	No	No	No		No	No	No	No	No	No	No	No	No	No	0	No	0	No	0	No	2	No	No;No;No;No;No;No;No;No;No	Asymptomatic	Personal vehicle	Private	Never	No	Never	No	Occasionally non veg	NV
1075	0.067	0	Negative	Male	Staff	53	TECHNICIAN	S	O(+)ve	O	Positive	No	No	No	No	No	No	No	No		No	No	No	No	No	No		SU		SU	0	No	0	No	0	No	0	No	No;No;No;SU;SU;No;No;No;No	Asymptomatic	Personal vehicle	Private	Never	No	Never	No	Non vegetarian	NV
1076	0.071	0	Negative	Male	Faculty	43	SENIOR SCIENTIST	S	A+	A	Positive	Yes	Yes	No	No	No	No	No	No		No	No	No	No	No	No	No	No	No	No	0	No	1	No	0	No	1	No	No;No;No;No;No;No;No;No;No	Asymptomatic	Personal vehicle	Private	Never	No	Occasionally	Occ	Non vegetarian	NV
1077	0.062	0	Negative	Female	Staff	29	Project Assistant	S	A+	A	Positive	No	No	No	No	No	No	No	No		No	No	No	No	No	No	No	No	No	No	1	No	1	No	2	No	0	No	No;No;No;No;No;No;No;No;No	Asymptomatic	Auto	Public	Never	No	Never	No	Non vegetarian	NV
1078	0.064	0	Negative	Male	Staff	58	SCIENTIST	S	A(+)ve	A	Positive	No	No	No	No	No	No	No	No		No	No	No	No	No	No		SU		SU	0	No	0	No	0	No	0	No	No;No;No;SU;SU;No;No;No;No	Asymptomatic	Personal vehicle	Private	Never	No	Never	No	Vegetarian	V
1079	0.064	0	Negative	Female	Others	SU	HOUSE WIFE	S	O(+)ve	O	Positive	Yes	Yes	No	No	No	No	No	No		No	No	No	No	No	No		SU		SU	0	No	0	No	0	No	0	No	No;No;No;SU;SU;No;No;No;No	Asymptomatic	Personal vehicle	Private	Never	No	Never	No	Non vegetarian	NV
1080	0.062	0	Negative	Male	Staff	42	Scientist	S	B+	B	Positive	No	No	No	No	No	No	No	No		No	No	No	No	No	No		SU		SU	2	No	2	No	0	No	0	No	No;No;No;SU;SU;No;No;No;No	Asymptomatic	Personal vehicle	Private	Never	No	Occasionally	Occ	Non vegetarian	NV
1081	0.084	0	Negative	Male	Others	59	SCIENTIST(PENSIONER)	S		SU	SU	No	No	No	No	No	No	No	No		No	No	No	No	No	No		SU		SU	0	No	0	No	0	No	0	No	No;No;No;SU;SU;No;No;No;No	Asymptomatic	Personal vehicle	Private	Never	No	Never	No	Vegetarian	V
1082	0.065	0	Negative	Male	Student	24	PROJECT ASSISTANT	S	O(+)ve	O	Positive	No	No	No	No	No	No	No	No		No	No	No	No	No	No		SU		SU	0	No	0	No	0	No	0	No	No;No;No;SU;SU;No;No;No;No	Asymptomatic	Personal vehicle	Private	Never	No	Never	No	Occasionally non veg	NV
1083	0.064	0	Negative	Male	Student	23	PROJECT ASSISTANT	S	O(+)ve	O	Positive	No	No	No	No	No	No	No	No		No	No	No	No	No	No		SU		SU	0	No	0	No	0	No	0	No	No;No;No;SU;SU;No;No;No;No	Asymptomatic	Personal vehicle	Private	Never	No	Never	No	Non vegetarian	NV
1084	0.064	0	Negative	Male	Contractual Staff	30	civil(contract)	OS	B(+)ve	B	Positive	No	No	No	No	No	No	No	No		No	No	No	No	No	No		SU		SU	0	No	0	No	0	No	0	No	No;No;No;SU;SU;No;No;No;No	Asymptomatic	Personal vehicle	Private	Never	No	Never	No	Occasionally non veg	NV
1085	19.02	1	Positive	Male	Others	19	APP	S	O(+)ve	O	Positive	No	No	No	No	No	No	No	No		No	No	No	No	No	No		SU		SU	0	No	0	No	0	No	0	No	No;No;No;SU;SU;No;No;No;No	Asymptomatic	Personal vehicle	Private	Never	No	Never	No	Non vegetarian	NV
1086	0.064	0	Negative	Male	Others	40	scientist	S	O+	O	Positive	No	No	No	No	No	No	No	No		No	No	No	No	No	No	No	No	No	No	0	No	0	No	0	No	0	No	No;No;No;No;No;No;No;No;No	Asymptomatic	Personal vehicle	Private	Never	No	Occasionally	Occ	Non vegetarian	NV
1087	0.067	0	Negative	Male	Others	40	scientist	S	O+	O	Positive	No	No	No	No	No	No	No	No		No	No	No	No	No	No	No	No	No	No	0	No	0	No	0	No	0	No	No;No;No;No;No;No;No;No;No	Asymptomatic	Personal vehicle	Private	Never	No	Occasionally	Occ	Non vegetarian	NV
1088	0.075	0	Negative	Male	Others	19	APP	S	A(-)ve	A	Negative	No	No	No	No	No	No	No	No		No	No	No	No	No	No		SU		SU	0	No	0	No	0	No	0	No	No;No;No;SU;SU;No;No;No;No	Asymptomatic	Personal vehicle	Private	Never	No	Never	No	Non vegetarian	NV
1089	0.064	0	Negative	Male	Staff	32	SRF	S	AB(+)ve	AB	Positive	No	No	No	No	No	No	No	No		No	No	No	No	No	No		SU		SU	0	No	0	No	0	No	0	No	No;No;No;SU;SU;No;No;No;No	Asymptomatic	Personal vehicle	Private	Never	No	Never	No	Non vegetarian	NV
1090	0.07	0	Negative	Male	Staff	56	scientist	S	A(+)ve	A	Positive	No	No	No	No	No	No	No	No		No	No	No	No	No	No		SU		SU	0	No	0	No	0	No	0	No	No;No;No;SU;SU;No;No;No;No	Asymptomatic	Personal vehicle	Private	Never	No	Never	No	Occasionally non veg	NV
1091	2.8	1	Positive	Male	Staff	50	SCIENTIST	S	AB(+)ve	AB	Positive	No	No	No	No	No	No	No	No		No	No	No	No	No	No		SU		SU	0	No	0	No	0	No	0	No	No;No;No;SU;SU;No;No;No;No	Asymptomatic	Personal vehicle	Private	Never	No	Never	No	Non vegetarian	NV
1092	0.065	0	Negative	Male	Faculty	42	Scientist	S	B(+)ve	B	Positive	No	No	No	No	No	No	No	No		No	No	No	No	No	No	No	No	No	No	1	No	1	No	1	No	0	No	No;No;No;No;No;No;No;No;No	Asymptomatic	Personal vehicle	Private	Sporadic	Yes	Occasionally	Occ	Non vegetarian	NV
1093	0.064	0	Negative	Male	Staff	48	Scientist	S	O-	O	Negative	No	No	No	No	No	No	No	No		No	No	No	No	No	No	No	No	No	No	0	No	0	No	0	No	0	No	No;No;No;No;No;No;No;No;No	Asymptomatic	Personal vehicle	Private	Never	No	Never	No	Non vegetarian	NV
1094	3.47	1	Positive	Male	Staff	55	technical officer	S	O(+)ve	O	Positive	No	No	No	No	No	No	No	No		No	No	No	No	No	No		SU		SU	0	No	0	No	0	No	0	No	No;No;No;SU;SU;No;No;No;No	Asymptomatic	Personal vehicle	Private	Never	No	Never	No	Non vegetarian	NV
1095	0.066	0	Negative	Female	Others	39	HOUSE WIFE	S	B(+)ve	B	Positive	No	No	No	No	No	No	No	No		No	No	No	No	No	No		SU		SU	0	No	0	No	0	No	0	No	No;No;No;SU;SU;No;No;No;No	Asymptomatic	Personal vehicle	Private	Never	No	Never	No	Vegetarian	V
1096	0.067	0	Negative	Male	Student	30	SRF	S	O(+)ve	O	Positive	No	No	No	No	No	No	No	No		No	No	No	No	No	No		SU		SU	0	No	0	No	0	No	0	No	No;No;No;SU;SU;No;No;No;No	Asymptomatic	Personal vehicle	Private	Never	No	Never	No	Non vegetarian	NV
1097	0.079	0	Negative	Male	Student	27	PhD(STUDENT)	S	B(+)ve	B	Positive	No	No	No	No	No	No	No	No		No	No	No	No	No	No		SU		SU	0	No	0	No	0	No	0	No	No;No;No;SU;SU;No;No;No;No	Asymptomatic	Personal vehicle	Private	Never	No	Never	No	Vegetarian	V
1098	0.073	0	Negative	Male	Contractual Staff	30	hls (contract)	OS		SU	SU	No	No	No	No	No	No	No	No		No	No	No	No	No	No		SU		SU	0	No	0	No	0	No	0	No	No;No;No;SU;SU;No;No;No;No	Asymptomatic	Personal vehicle	Private	Never	No	Never	No	Non vegetarian	NV
1099	0.082	0	Negative	Male	Staff	50	SCIENTIST	S	B(+)ve	B	Positive	No	No	No	No	No	No	No	No		No	No	No	No	No	No		SU		SU	0	No	0	No	0	No	0	No	No;No;No;SU;SU;No;No;No;No	Asymptomatic	Personal vehicle	Private	Never	No	Never	No	Vegetarian	V
1100	0.093	0	Negative	Male	Staff	57	SENIOR PRINCIPAL SCIENTIST,	S	A+	A	Positive	No	No	Yes	Yes	No	No	No	No		No	No	No	No	No	No	No	No	No	No	0	No	0	No	0	No	0	No	No;No;No;No;No;No;No;No;No	Asymptomatic	Personal vehicle	Private	Never	No	Never	No	Occasionally non veg	NV
1101	0.064	0	Negative	Male	Student	31	Student	S	A(+)ve	A	Positive	No	No	No	No	No	No	No	No		No	No	No	No	No	No	No	No	No	No	1	No	1	No	1	No	1	No	No;No;No;No;No;No;No;No;No	Asymptomatic	Personal vehicle	Private	Never	No	Never	No	Non vegetarian	NV
1102	0.064	0	Negative	Male	Student	24	SRF	S	A(+)ve	A	Positive	No	No	No	No	No	No	No	No		No	No	No	No	No	No		SU		SU	0	No	0	No	0	No	0	No	No;No;No;SU;SU;No;No;No;No	Asymptomatic	Personal vehicle	Private	Never	No	Never	No	Non vegetarian	NV
1103	0.065	0	Negative	Male	Student	32	SRF	S		SU	SU	No	No	No	No	No	No	No	No		No	No	No	No	No	No		SU		SU	0	No	0	No	0	No	0	No	No;No;No;SU;SU;No;No;No;No	Asymptomatic	Personal vehicle	Private	Never	No	Never	No	Non vegetarian	NV
1104	0.062	0	Negative	Male	Student	24	jrf	S		SU	SU	No	No	No	No	No	No	No	No		No	No	No	No	No	No		SU		SU	0	No	0	No	0	No	0	No	No;No;No;SU;SU;No;No;No;No	Asymptomatic	Personal vehicle	Private	Never	No	Never	No	Non vegetarian	NV
1105	1.67	1	Positive	Female	Student	26	srf	S	A(-)ve	A	Negative	No	No	No	No	No	No	No	No		No	No	No	No	No	No		SU		SU	0	No	0	No	0	No	0	No	No;No;No;SU;SU;No;No;No;No	Asymptomatic	Personal vehicle	Private	Never	No	Never	No	Occasionally non veg	NV
1106	0.065	0	Negative	Male	Student	27	srf	S	B(+)ve	B	Positive	No	No	No	No	No	No	No	No		No	No	No	No	No	No		SU		SU	0	No	0	No	0	No	0	No	No;No;No;SU;SU;No;No;No;No	Asymptomatic	Personal vehicle	Private	Never	No	Never	No	Occasionally non veg	NV
1107	0.094	0	Negative	Male	Student	27	Student	S	A(+)ve	A	Positive	No	No	No	No	No	No	No	No		No	No	No	No	No	No	No	No	No	No	1	No	1	No	1	No	0	No	No;No;No;No;No;No;No;No;No	Asymptomatic	Personal vehicle	Private	Never	No	Never	No	Non vegetarian	NV
1108	0.067	0	Negative	Male	Staff	37	technician	S		SU	SU	No	No	No	No	No	No	No	No		No	No	No	No	No	No		SU		SU	0	No	0	No	0	No	0	No	No;No;No;SU;SU;No;No;No;No	Asymptomatic	Personal vehicle	Private	Never	No	Never	No	Non vegetarian	NV
1109	0.072	0	Negative	Male	Staff	37	technician	S		SU	SU	No	No	No	No	No	No	No	No		No	No	No	No	No	No		SU		SU	0	No	0	No	0	No	0	No	No;No;No;SU;SU;No;No;No;No	Asymptomatic	Personal vehicle	Private	Never	No	Never	No	Non vegetarian	NV
1110	0.09	0	Negative	Male	Staff	37	scientist	S	AB(+)ve	AB	Positive	No	No	No	No	No	No	No	No		No	No	No	No	No	No		SU		SU	0	No	0	No	0	No	0	No	No;No;No;SU;SU;No;No;No;No	Asymptomatic	Personal vehicle	Private	Never	No	Never	No	Vegetarian	V
1111	4.64	1	Positive	Male	Contractual Staff	57	security	OS	O(+)ve	O	Positive	No	No	No	No	No	No	No	No		No	No	No	No	No	No		SU		SU	0	No	0	No	0	No	0	No	No;No;No;SU;SU;No;No;No;No	Asymptomatic	Personal vehicle	Private	Never	No	Never	No	Occasionally non veg	NV
1112	0.062	0	Negative	Male	Others	30	RA	S		SU	SU	No	No	No	No	No	No	No	No		No	No	No	No	No	No		SU		SU	0	No	0	No	0	No	0	No	No;No;No;SU;SU;No;No;No;No	Asymptomatic	Personal vehicle	Private	Never	No	Never	No	Occasionally non veg	NV
1113	0.065	0	Negative	Male	Student	28	Student	S	B(+)ve	B	Positive	No	No	No	No	No	No	No	No		No	No	No	No	No	No	No	No	No	No	1	No	0	No	0	No	0	No	No;No;No;No;No;No;No;No;No	Asymptomatic	Personal vehicle	Private	Never	No	Never	No	Non vegetarian	NV
1114	0.059	0	Negative	Male	Faculty	59	scientist	S	O(+)ve	O	Positive	Yes	Yes	Yes	Yes	No	No	No	No		No	No	No	No	No	No		SU		SU	2	No	0	No	0	No	0	No	No;No;No;SU;SU;No;No;No;No	Asymptomatic	Personal vehicle	Private	Never	No	Never	No	Vegetarian	V
1115	0.07	0	Negative	Female	Others	28	nil	S	B(+)ve	B	Positive	No	No	No	No	No	No	No	No		No	No	No	No	No	No		SU		SU	0	No	0	No	0	No	0	No	No;No;No;SU;SU;No;No;No;No	Asymptomatic	Personal vehicle	Private	Never	No	Never	No	Vegetarian	V
1116	0.066	0	Negative	Male	Student	30	Student	S	B(+)ve	B	Positive	No	No	No	No	No	No	No	No		No	No	No	No	No	No	No	No	No	No	1	No	1	No	1	No	0	No	No;No;No;No;No;No;No;No;No	Asymptomatic	Personal vehicle	Private	Never	No	Never	No	Non vegetarian	NV
1117	0.081	0	Negative	Male	Staff	25	project assistant	S	O(+)ve	O	Positive	No	No	No	No	No	No	No	No		No	No	No	No	No	No		SU		SU	0	No	0	No	0	No	0	No	No;No;No;SU;SU;No;No;No;No	Asymptomatic	Personal vehicle	Private	Never	No	Never	No	Non vegetarian	NV
1118	21.47	1	Positive	Male	Contractual Staff	54	security	OS		SU	SU	No	No	No	No	No	No	No	No		No	No	No	No	No	No		SU		SU	2	No	0	No	0	No	0	No	No;No;No;SU;SU;No;No;No;No	Asymptomatic	Personal vehicle	Private	Never	No	Never	No	Non vegetarian	NV
1119	0.066	0	Negative	Male	Contractual Staff	54	security	OS	B(+)ve	B	Positive	No	No	No	No	No	No	No	No		No	No	No	No	No	No	No	No	No	No	2	No	0	No	0	No	0	No	No;No;No;No;No;No;No;No;No	Asymptomatic	Personal vehicle	Private	Never	No	Never	No	Non vegetarian	NV
1120	0.063	0	Negative	Male	Contractual Staff	27	Project Assistant	S	B(+)ve	B	Positive	No	No	No	No	No	No	No	No		No	No	No	No	No	No	No	No	No	No	1	No	0	No	0	No	0	No	No;No;No;No;No;No;No;No;No	Asymptomatic	Personal vehicle	Private	Never	No	Never	No	Non vegetarian	NV
1121	124.6	1	Positive	Female	Student	29	Ph.D. Student	S		SU	SU	No	No	No	No	No	No	No	No		No	No	No	No	No	No	No	No	No	No	1	No	0	No	0	No	0	No	No;No;No;No;No;No;No;No;No	Asymptomatic	Personal vehicle	Private	Never	No	Never	No	Non vegetarian	NV
1122	0.075	0	Negative	Male	Contractual Staff	55	security	OS		SU	SU	No	No	No	No	No	No	No	No		No	No	No	No	No	No	No	No	No	No	2	No	0	No	0	No	0	No	No;No;No;No;No;No;No;No;No	Asymptomatic	Personal vehicle	Private	Never	No	Never	No	Non vegetarian	NV
1123	0.066	0	Negative	Male	Contractual Staff	53	security	OS	O(+)ve	O	Positive	No	No	No	No	No	No	No	No		No	No	No	No	No	No		SU		SU	1	No	0	No	0	No	0	No	No;No;No;SU;SU;No;No;No;No	Asymptomatic	Personal vehicle	Private	Never	No	Never	No	Non vegetarian	NV
1124	8.07	1	Positive	Male	Contractual Staff	54	security	OS		SU	SU	No	No	No	No	No	No	No	No		No	No	No	No	No	No		SU		SU	2	No	0	No	0	No	0	No	No;No;No;SU;SU;No;No;No;No	Asymptomatic	Personal vehicle	Private	Never	No	Never	No	Non vegetarian	NV
1125	0.087	0	Negative	Male	Staff	53	Technical officer	S	AB(+)ve	AB	Positive	No	No	No	No	No	No	No	No		No	No	No	No	No	No		SU		SU	1	No	0	No	0	No	0	No	No;No;No;SU;SU;No;No;No;No	Asymptomatic	Personal vehicle	Private	Never	No	Never	No	Non vegetarian	NV
1126	0.068	0	Negative	Male	Staff	54	Technical Officer	S	B(+)ve	B	Positive	No	No	No	No	No	No	No	No		No	No	No	No	No	No	No	No	No	No	1	No	1	No	1	No	0	No	No;No;No;No;No;No;No;No;No	Asymptomatic	Personal vehicle	Private	Sporadic	Yes	Occasionally	Occ	Non vegetarian	NV
1127	0.068	0	Negative	Male	Staff	54	Technician	S	B(+)ve	B	Positive	No	No	No	No	No	No	No	No		No	No	No	No	No	No	No	No	No	No	1	No	1	No	1	No	0	No	No;No;No;No;No;No;No;No;No	Asymptomatic	Personal vehicle	Private	Never	No	Never	No	Non vegetarian	NV
1128	0.064	0	Negative	Male	Contractual Staff	35	security	OS	B(+)ve	B	Positive	No	No	No	No	No	No	No	No		No	No	No	No	No	No		SU		SU	2	No	0	No	0	No	0	No	No;No;No;SU;SU;No;No;No;No	Asymptomatic	Personal vehicle	Private	Never	No	Never	No	Non vegetarian	NV
1129	0.064	0	Negative	Female	Faculty	32	Scientist	S	O+	O	Positive	No	No	No	No	No	No	No	No		No	No	No	No	No	No	No	No	No	No	0	No	0	No	0	No	0	No	No;No;No;No;No;No;No;No;No	Asymptomatic	Personal vehicle	Private	Never	No	Never	No	Occasionally non veg	NV
1130	0.131	0	Negative	Male	Contractual Staff	53	security	OS	O(+)ve	O	Positive	No	No	No	No	No	No	No	No		No	No	No	No	No	No		SU		SU	2	No	0	No	0	No	0	No	No;No;No;SU;SU;No;No;No;No	Asymptomatic	Personal vehicle	Private	Never	No	Never	No	Non vegetarian	NV
1131	0.065	0	Negative	Male	Contractual Staff	39	security	OS		SU	SU	No	No	No	No	No	No	No	No		No	No	No	No	No	No		SU		SU	0	No	0	No	0	No	0	No	No;No;No;SU;SU;No;No;No;No	Asymptomatic	Personal vehicle	Private	Never	No	Never	No	Occasionally non veg	NV
1132	0.07	0	Negative	Male	Contractual Staff	57	SECURITY	OS		SU	SU	No	No	No	No	No	No	No	No		No	No	No	No	No	No		SU		SU	0	No	0	No	0	No	0	No	No;No;No;SU;SU;No;No;No;No	Asymptomatic	Personal vehicle	Private	Never	No	Never	No	Occasionally non veg	NV
1133	27.58	1	Positive	Male	Staff	28	TECHNICIAN	S	O(-)ve	O	Negative	No	No	No	No	No	No	No	No		No	No	No	No	No	No		SU		SU	0	No	0	No	0	No	0	No	No;No;No;SU;SU;No;No;No;No	Asymptomatic	Personal vehicle	Private	Never	No	Never	No	Vegetarian	V
1134	0.781	0	Negative	Male	Others	47	hls	SU	O(+)ve	O	Positive	No	No	No	No	No	No	No	No		No	No	No	No	No	No	No	No	No	No	0	No	0	No	0	No	0	No	No;No;No;No;No;No;No;No;No	Asymptomatic	Personal vehicle	Private	Never	No	Never	No	Non vegetarian	NV
1135	0.064	0	Negative	Male	Staff	54	SCIENTIST	S	O(+)ve	O	Positive	No	No	No	No	No	No	No	No		No	No	No	No	No	No		SU		SU	0	No	0	No	0	No	0	No	No;No;No;SU;SU;No;No;No;No	Asymptomatic	Personal vehicle	Private	Never	No	Never	No	Occasionally non veg	NV
1136	0.065	0	Negative	Male	Contractual Staff	19	security	OS	B(+)ve	B	Positive	No	No	No	No	No	No	No	No		No	No	No	No	No	No	No	No	No	No	0	No	0	No	0	No	0	No	No;No;No;No;No;No;No;No;No	Asymptomatic	Personal vehicle	Private	Never	No	Never	No	Occasionally non veg	NV
1137	0.468	0	Negative	Male	Contractual Staff	55	security	OS		SU	SU	No	No	No	No	No	No	No	No		No	No	No	No	No	No		SU		SU	0	No	0	No	0	No	0	No	No;No;No;SU;SU;No;No;No;No	Asymptomatic	Personal vehicle	Private	Never	No	Never	No	Occasionally non veg	NV
1138	0.067	0	Negative	Male	Staff	56	scientist	S	O(+)ve	O	Positive	No	No	No	No	No	No	No	No		No	No	No	No	No	No		SU		SU	0	No	0	No	0	No	0	No	No;No;No;SU;SU;No;No;No;No	Asymptomatic	Personal vehicle	Private	Never	No	Never	No	Non vegetarian	NV
1139	0.126	0	Negative	Male	Others	38	Ramanujan Fellow	S	O+	O	Positive	No	No	No	No	No	No	No	No		No	No	No	No	No	No	No	No	No	No	0	No	0	No	0	No	0	No	No;No;No;No;No;No;No;No;No	Asymptomatic	Cab	Public	Never	No	Never	No	Occasionally non veg	NV
1140	0.068	0	Negative	Male	Faculty	34	Scientist	S	O+	O	Positive	No	No	No	No	No	No	No	No		No	No	Yes	Yes	No	No	No	No	No	No	1	No	1	No	1	No	0	No	No;Yes;No;No;No;No;No;No;No	Symptomatic	Personal vehicle	Private	Never	No	Never	No	Vegetarian	V
1141	0.064	0	Negative	Male	Student	24	project assistant	S		SU	SU	No	No	No	No	No	No	No	No		No	No	No	No	No	No		SU		SU	0	No	0	No	0	No	0	No	No;No;No;SU;SU;No;No;No;No	Asymptomatic	Personal vehicle	Private	Never	No	Never	No	Non vegetarian	NV
1142	0.074	0	Negative	Male	Staff	59	security assistant	S		SU	SU	Yes	Yes	No	No	No	No	No	No		No	No	No	No	No	No	No	No	No	No	2	No	0	No	0	No	0	No	No;No;No;No;No;No;No;No;No	Asymptomatic	Personal vehicle	Private	Never	No	Never	No	Non vegetarian	NV
1143	0.065	0	Negative	Male	Staff	50	Sr. Technical Officer	S	O+	O	Positive	No	No	Yes	Yes	No	No	No	No		No	No	No	No	No	No	No	No	No	No	1	No	1	No	0	No	0	No	No;No;No;No;No;No;No;No;No	Asymptomatic	Personal vehicle	Private	Never	No	Never	No	Occasionally non veg	NV
1144	0.065	0	Negative	Male	Contractual Staff	54	security	OS	B(+)ve	B	Positive	No	No	No	No	No	No	No	No		No	No	No	No	No	No		SU		SU	0	No	0	No	0	No	0	No	No;No;No;SU;SU;No;No;No;No	Asymptomatic	Personal vehicle	Private	Never	No	Never	No	Non vegetarian	NV
1145	0.065	0	Negative	Male	Contractual Staff	40	security	OS	A(+)ve	A	Positive	No	No	No	No	No	No	No	No		No	No	No	No	No	No		SU		SU	0	No	0	No	0	No	0	No	No;No;No;SU;SU;No;No;No;No	Asymptomatic	Personal vehicle	Private	Never	No	Never	No	Occasionally non veg	NV
1146	0.076	0	Negative	Male	Student	34	srf	S	O(+)ve	O	Positive	No	No	No	No	No	No	No	No		No	No	No	No	No	No		SU		SU	0	No	0	No	0	No	0	No	No;No;No;SU;SU;No;No;No;No	Asymptomatic	Personal vehicle	Private	Never	No	Never	No	Occasionally non veg	NV
1147	0.068	0	Negative	Male	Student	23	JRF	S	AB(+)ve	AB	Positive	No	No	No	No	No	No	No	No		No	No	No	No	No	No		SU		SU	0	No	0	No	0	No	0	No	No;No;No;SU;SU;No;No;No;No	Asymptomatic	Personal vehicle	Private	Never	No	Never	No	Non vegetarian	NV
1148	0.063	0	Negative	Male	Student	31	PhD	S	O(+)ve	O	Positive	No	No	No	No	No	No	No	No		No	No	No	No	No	No		SU		SU	0	No	0	No	0	No	0	No	No;No;No;SU;SU;No;No;No;No	Asymptomatic	Personal vehicle	Private	Never	No	Never	No	Non vegetarian	NV
1149	1.54	1	Positive	Male	Student	28	phd	S	B(+)ve	B	Positive	No	No	No	No	No	No	No	No		No	No	No	No	No	No		SU		SU	0	No	0	No	0	No	0	No	No;No;No;SU;SU;No;No;No;No	Asymptomatic	Personal vehicle	Private	Never	No	Never	No	Non vegetarian	NV
1150	0.07	0	Negative	Male	Staff	54	SENIOR TECHNICIAN(3)	S	A+	A	Positive	No	No	No	No	No	No	No	No		No	No	No	No	No	No	No	No	No	No	1	No	1	No	1	No	0	No	No;No;No;No;No;No;No;No;No	Asymptomatic	Personal vehicle	Private	Never	No	Never	No	Vegetarian	V
1151	0.066	0	Negative	Female	Others	47	house wife	S		SU	SU	No	No	No	No	No	No	No	No		No	No	No	No	No	No		SU		SU	0	No	0	No	0	No	0	No	No;No;No;SU;SU;No;No;No;No	Asymptomatic	Personal vehicle	Private	Never	No	Never	No	Vegetarian	V
1152	0.071	0	Negative	Male	Staff	47	scientist	S	A(-)ve	A	Negative	No	No	No	No	No	No	No	No		No	No	No	No	No	No		SU		SU	0	No	0	No	0	No	0	No	No;No;No;SU;SU;No;No;No;No	Asymptomatic	Personal vehicle	Private	Never	No	Never	No	Non vegetarian	NV
1153	0.077	0	Negative	Male	Staff	55	technician	S		SU	SU	No	No	No	No	No	No	No	No		No	No	No	No	No	No		SU		SU	0	No	0	No	0	No	0	No	No;No;No;SU;SU;No;No;No;No	Asymptomatic	Personal vehicle	Private	Never	No	Never	No	Non vegetarian	NV
1154	0.067	0	Negative	Male	Staff	58	ENGINEER	S	O(+)ve	O	Positive	No	No	Yes	Yes	No	No	No	No		No	No	No	No	No	No	No	No	No	No	1	No	0	No	0	No	0	No	No;No;No;No;No;No;No;No;No	Asymptomatic	Personal vehicle	Private	Never	No	Never	No	Vegetarian	V
1155	0.066	0	Negative	Male	Staff	58	technician	S	B(+)ve	B	Positive	No	No	No	No	No	No	No	No		No	No	No	No	No	No		SU		SU	0	No	0	No	0	No	0	No	No;No;No;SU;SU;No;No;No;No	Asymptomatic	Personal vehicle	Private	Never	No	Never	No	Non vegetarian	NV
1156	0.065	0	Negative	Male	Staff	44	Govt. Service	S	B+	B	Positive	No	No	No	No	No	No	No	No		No	No	No	No	No	No	No	No	No	No	1	No	1	No	0	No	0	No	No;No;No;No;No;No;No;No;No	Asymptomatic	Personal vehicle	Private	Never	No	Never	No	Occasionally non veg	NV
1157	0.067	0	Negative	Male	Contractual Staff	54	security	OS		SU	SU	No	No	No	No	No	No	No	No		No	No	No	No	No	No		SU		SU	0	No	0	No	0	No	0	No	No;No;No;SU;SU;No;No;No;No	Asymptomatic	Personal vehicle	Private	Never	No	Never	No	Non vegetarian	NV
1158	0.064	0	Negative	Male	Staff	43	scientist	S		SU	SU	No	No	No	No	No	No	No	No		No	No	No	No	No	No		SU		SU	0	No	0	No	0	No	0	No	No;No;No;SU;SU;No;No;No;No	Asymptomatic	Personal vehicle	Private	Never	No	Never	No	Non vegetarian	NV
1159	0.071	0	Negative	Female	Others	51	house wife	S		SU	SU	No	No	No	No	No	No	No	No		No	No	No	No	No	No		SU		SU	0	No	0	No	0	No	0	No	No;No;No;SU;SU;No;No;No;No	Asymptomatic	Personal vehicle	Private	Never	No	Never	No	Non vegetarian	NV
1160	0.076	0	Negative	Male	Staff	43	MEDICAL LAB TECHNICIAN	S	B+	B	Positive	No	No	No	No	No	No	Yes	Yes	Negative	No	No	No	No	No	No	No	No	No	No	0	No	0	No	0	No	0	No	No;No;No;No;No;No;No;No;No	Asymptomatic	Public transport	Public	Never	No	Never	No	Vegetarian	V
1161	0.059	0	Negative	Male	Staff	53	Sr. Principal Scientist	S	B+	B	Positive	No	No	Yes	Yes	No	No	No	No		No	No	No	No	No	No	No	No	No	No	2	No	2	No	1	No	0	No	No;No;No;No;No;No;No;No;No	Asymptomatic	Personal vehicle	Private	Never	No	Never	No	Vegetarian	V
1162	0.059	0	Negative	Male	Staff	53	Service	S	A+	A	Positive	No	No	Yes	Yes	No	No	No	No		No	No	No	No	No	No	No	No	No	No	0	No	0	No	0	No	0	No	No;No;No;No;No;No;No;No;No	Asymptomatic	Personal vehicle	Private	Never	No	Never	No	Vegetarian	V
1163	0.065	0	Negative	Male	Staff	52	Govt. Official	S	B+	B	Positive	No	No	Yes	Yes	No	No	No	No		No	No	No	No	No	No	No	No	No	No	1	No	0	No	0	No	0	No	No;No;No;No;No;No;No;No;No	Asymptomatic	Personal vehicle	Private	Never	No	Occasionally	Occ	Occasionally non veg	NV
1164	0.069	0	Negative	Male	Staff	44	Accountant	S	AB+	AB	Positive	No	No	No	No	No	No	No	No		No	No	No	No	No	No	No	No	No	No	1	No	0	No	0	No	0	No	No;No;No;No;No;No;No;No;No	Asymptomatic	Personal vehicle	Private	Sporadic	Yes	Occasionally	Occ	Vegetarian	V
1165	0.068	0	Negative	Male	Faculty	34	scientist	S	B+	B	Positive	No	No	No	No	No	No	No	No		No	No	No	No	No	No	No	No	No	No	1	No	0	No	0	No	0	No	No;No;No;No;No;No;No;No;No	Asymptomatic	Personal vehicle	Private	Never	No	Occasionally	Occ	Non vegetarian	NV
1166	0.063	0	Negative	Male	Staff	33	job	S	O+	O	Positive	No	No	No	No	No	No	No	No		No	No	No	No	Yes	Yes	No	No	No	No	3	Yes	0	No	3	Yes	0	No	No;No;Yes;No;No;Yes;No;Yes;No	Symptomatic	Personal vehicle	Private	Never	No	Occasionally	Occ	Occasionally non veg	NV
1167	0.063	0	Negative	Male	Staff	33	Sr. Scientist @CEERI Pilani	S	O+	O	Positive	No	No	No	No	No	No	No	No		No	No	No	No	No	No	No	No	No	No	0	No	0	No	0	No	0	No	No;No;No;No;No;No;No;No;No	Asymptomatic	Personal vehicle	Private	Never	No	Never	No	Vegetarian	V
1168	0.06	0	Negative	Female	Staff	40	Govt. Employee	S	A+	A	Positive	No	No	No	No	No	No	No	No		No	No	No	No	No	No	No	No	No	No	0	No	0	No	0	No	0	No	No;No;No;No;No;No;No;No;No	Asymptomatic	Personal vehicle	Private	Never	No	Never	No	Non vegetarian	NV
1169	0.065	0	Negative	Male	Student	29	PhD Scholar	S	O+	O	Positive	No	No	No	No	No	No	No	No		No	No	No	No	Yes	Yes	No	No	No	No	2	No	2	No	0	No	0	No	No;No;Yes;No;No;No;No;No;No	Symptomatic	No	Private	Never	No	Never	No	Vegetarian	V
1170	0.061	0	Negative	Female	Staff	31	Scientist	S	B+	B	Positive	No	No	No	No	No	No	No	No		No	No	Yes	Yes	No	No	No	No	No	No	1	No	0	No	2	No	0	No	No;Yes;No;No;No;No;No;No;No	Symptomatic	Personal vehicle	Private	Never	No	Never	No	Vegetarian	V
1171	0.064	0	Negative	Male	Staff	41	Service	S	B+	B	Positive	No	No	No	No	No	No	No	No		No	No	No	No	No	No	No	No	No	No	0	No	0	No	0	No	0	No	No;No;No;No;No;No;No;No;No	Asymptomatic	Personal vehicle	Private	Never	No	Never	No	Non vegetarian	NV
1172	0.062	0	Negative	Male	Staff	34	Technical Officer	S	O+	O	Positive	No	No	No	No	No	No	No	No		No	No	No	No	No	No	No	No	No	No	1	No	3	Yes	0	No	0	No	No;No;No;No;No;No;Yes;No;No	Symptomatic	Personal vehicle	Private	Never	No	Occasionally	Occ	Vegetarian	V
1173	0.061	0	Negative	Male	Faculty	31	Senior Scientist	S	B+	B	Positive	No	No	Yes	Yes	No	No	No	No		No	No	No	No	No	No	No	No	No	No	2	No	1	No	4	Yes	0	No	No;No;No;No;No;No;No;Yes;No	Symptomatic	Personal vehicle	Private	Never	No	Never	No	Vegetarian	V
1174	0.066	0	Negative	Male	Student	31	PhD Scholar	S	A+	A	Positive	No	No	No	No	No	No	No	No		No	No	No	No	No	No	No	No	No	No	1	No	0	No	0	No	0	No	No;No;No;No;No;No;No;No;No	Asymptomatic	Personal vehicle	Private	Never	No	Occasionally	Occ	Vegetarian	V
1175	0.061	0	Negative	Male	Staff	54	Service	S	A+	A	Positive	Yes	Yes	No	No	No	No	No	No		No	No	No	No	No	No	No	No	No	No	1	No	0	No	0	No	0	No	No;No;No;No;No;No;No;No;No	Asymptomatic	Personal vehicle	Private	Regular	Yes	Never	No	Non vegetarian	NV
1176	0.065	0	Negative	Female	Others	50	House wife	S		SU	SU	No	No	No	No	No	No	No	No		No	No	No	No	No	No	No	No	No	No	1	No	0	No	0	No	0	No	No;No;No;No;No;No;No;No;No	Asymptomatic	Personal vehicle	Private	Never	No	Never	No	Non vegetarian	NV
1177	0.071	0	Negative	Male	Student	19	Student	S	B+	B	Positive	No	No	No	No	No	No	No	No		No	No	No	No	No	No	No	No	No	No	0	No	0	No	0	No	0	No	No;No;No;No;No;No;No;No;No	Asymptomatic	Personal vehicle	Private	Never	No	Never	No	Non vegetarian	NV
1178	0.06	0	Negative	Female	Staff	51	Medical Doctor	S	O+	O	Positive	No	No	Yes	Yes	No	No	No	No		No	No	No	No	No	No	No	No	No	No	3	Yes	2	No	0	No	0	No	No;No;No;No;No;Yes;No;No;No	Symptomatic	Walking	Private	Never	No	Never	No	Vegetarian	V
1179	0.063	0	Negative	Male	Others	23	Medical student	S	B+	B	Positive	No	No	Yes	Yes	No	No	No	No		No	No	No	No	No	No	No	No	No	No	1	No	0	No	0	No	0	No	No;No;No;No;No;No;No;No;No	Asymptomatic	Personal vehicle	Private	Never	No	Never	No	Vegetarian	V
1180	0.066	0	Negative	Male	Contractual Staff	26	SPF	S	B+	B	Positive	No	No	No	No	No	No	No	No		No	No	No	No	No	No	No	No	No	No	0	No	0	No	2	No	0	No	No;No;No;No;No;No;No;No;No	Asymptomatic	Public transport	Public	Never	No	Never	No	Occasionally non veg	NV
1181	0.066	0	Negative	Female	Others	51	Teacher	S	AB+	AB	Positive	No	No	No	No	No	No	No	No		No	No	No	No	No	No	No	No	No	No	0	No	0	No	0	No	0	No	No;No;No;No;No;No;No;No;No	Asymptomatic	Personal vehicle	Private	Never	No	Never	No	Vegetarian	V
1182	0.063	0	Negative	Male	Staff	51	Service	S	O+	O	Positive	No	No	No	No	No	No	No	No		No	No	No	No	No	No	No	No	No	No	0	No	0	No	0	No	0	No	No;No;No;No;No;No;No;No;No	Asymptomatic	Personal vehicle	Private	Never	No	Never	No	Non vegetarian	NV
1183	0.062	0	Negative	Male	Contractual Staff	35	Peon	OS		SU	SU	No	No	No	No	No	No	No	No		No	No	No	No	No	No	No	No	No	No	0	No	0	No	0	No	0	No	No;No;No;No;No;No;No;No;No	Asymptomatic	Personal vehicle	Private	Never	No	Never	No	Vegetarian	V
1184	0.063	0	Negative	Male	Staff	48	service	S	B+	B	Positive	No	No	No	No	No	No	No	No		No	No	No	No	No	No	No	No	No	No	0	No	0	No	0	No	0	No	No;No;No;No;No;No;No;No;No	Asymptomatic	Personal vehicle	Private	Never	No	Never	No	Occasionally non veg	NV
1185	0.064	0	Negative	Male	Others	33	worker	OS		SU	SU	No	No	No	No	No	No	No	No		No	No	No	No	No	No	No	No	No	No	0	No	0	No	0	No	0	No	No;No;No;No;No;No;No;No;No	Asymptomatic	Personal vehicle	Private	Never	No	Never	No	Vegetarian	V
1186	0.061	0	Negative	Female	Contractual Staff	26	Nurse	S	B+	B	Positive	No	No	No	No	No	No	No	No		No	No	No	No	No	No	No	No	No	No	0	No	0	No	0	No	0	No	No;No;No;No;No;No;No;No;No	Asymptomatic	Personal vehicle	Private	Never	No	Never	No	Vegetarian	V
1187	0.06	0	Negative	SU		42		SU		SU	SU		SU		SU		SU		SU			SU		SU		SU		SU		SU	Blank	SU	Blank	SU	Blank	SU	Blank	SU	SU;SU;SU;SU;SU;SU;SU;SU;SU	SU		Private		SU		SU		SU
1188	0.06	0	Negative	Male	Staff	33	Govt Employee	S	B+	B	Positive	No	No	No	No	No	No	No	No		No	No	No	No	Yes	Yes	No	No	No	No	1	No	0	No	0	No	0	No	No;No;Yes;No;No;No;No;No;No	Symptomatic	Personal vehicle	Private	Never	No	Never	No	Vegetarian	V
1189	0.29	0	Negative	Female	Staff	46	Govt Employee	S	A+	A	Positive	No	No	No	No	No	No	No	No		No	No	No	No	Yes	Yes	No	No	No	No	1	No	0	No	0	No	0	No	No;No;Yes;No;No;No;No;No;No	Symptomatic	Personal vehicle	Private	Never	No	Never	No	Non vegetarian	NV
1190	0.537	0	Negative	Female	Others	20	H/W	S	O+	O	Positive	No	No	No	No	No	No	No	No		No	No	No	No	No	No	No	No	No	No	0	No	0	No	0	No	0	No	No;No;No;No;No;No;No;No;No	Asymptomatic	Personal vehicle	Private	Never	No	Never	No	Occasionally non veg	NV
1191	0.062	0	Negative	Female	Others	64	H/W	S		SU	SU	No	No	No	No	No	No	No	No		No	No	No	No	No	No	No	No	No	No	0	No	0	No	0	No	0	No	No;No;No;No;No;No;No;No;No	Asymptomatic	Personal vehicle	Private	Never	No	Never	No	Vegetarian	V
1192	0.066	0	Negative	Male	Student	30	STUDENT	S	B+	B	Positive	No	No	No	No	No	No	No	No		No	No	Yes	Yes	No	No	No	No	No	No	3	Yes	0	No	0	No	0	No	No;Yes;No;No;No;Yes;No;No;No	Symptomatic	Personal vehicle	Private	Never	No	Never	No	Vegetarian	V
1193	0.061	0	Negative	Male	Staff	43	Scientist	S	A+	A	Positive	No	No	No	No	No	No	No	No		No	No	No	No	No	No	No	No	No	No	4	Yes	3	Yes	3	Yes	0	No	No;No;No;No;No;Yes;Yes;Yes;No	Symptomatic	Personal vehicle	Private	Never	No	Never	No	Vegetarian	V
1194	0.059	0	Negative	Male	Student	28	Project Assistant-III	S	B+	B	Positive	No	No	No	No	No	No	No	No		No	No	No	No	No	No	No	No	No	No	1	No	1	No	1	No	0	No	No;No;No;No;No;No;No;No;No	Asymptomatic	Cycle	Private	Never	No	Never	No	Occasionally non veg	NV
1195	0.062	0	Negative	Male	Others	42	Service	S	A+	A	Positive	No	No	No	No	No	No	No	No		No	No	No	No	No	No	No	No	No	No	3	Yes	2	No	1	No	1	No	No;No;No;No;No;Yes;No;No;No	Symptomatic	Personal vehicle	Private	Never	No	Never	No	Vegetarian	V
1196	0.065	0	Negative	Male	Staff	58	Service	S	B+	B	Positive	No	No	Yes	Yes	No	No	No	No		No	No	No	No	No	No	No	No	No	No	1	No	0	No	0	No	0	No	No;No;No;No;No;No;No;No;No	Asymptomatic	Shared cab	Public	Never	No	Occasionally	Occ	Vegetarian	V
1197	0.058	0	Negative	Male	Student	30	PhD research scholar	S	B+	B	Positive	No	No	No	No	No	No	No	No		No	No	No	No	No	No	No	No	No	No	4	Yes	3	Yes	0	No	0	No	No;No;No;No;No;Yes;Yes;No;No	Symptomatic	Personal vehicle	Private	Sporadic	Yes	Occasionally	Occ	Non vegetarian	NV
1198	0.062	0	Negative	Female	Student	20	Student	S	A+	A	Positive	No	No	No	No	No	No	No	No		No	No	No	No	No	No	No	No	No	No	0	No	0	No	0	No	0	No	No;No;No;No;No;No;No;No;No	Asymptomatic	Peddler	Private	Never	No	Never	No	Occasionally non veg	NV
1199	0.06	0	Negative	Male	Student	26	student	S	B+	B	Positive	No	No	No	No	No	No	No	No		No	No	No	No	No	No	No	No	No	No	0	No	0	No	0	No	0	No	No;No;No;No;No;No;No;No;No	Asymptomatic	Personal vehicle	Private	Never	No	Never	No	Vegetarian	V
1200	0.064	0	Negative	Female	Others	52	homemaker	S	O+	O	Positive	No	No	No	No	No	No	No	No		No	No	No	No	No	No	No	No	No	No	0	No	0	No	0	No	0	No	No;No;No;No;No;No;No;No;No	Asymptomatic	Personal vehicle	Private	Never	No	Never	No	Vegetarian	V
1201	0.062	0	Negative	Female	Others	31	Makeup Educator	S	O+	O	Positive	No	No	No	No	No	No	No	No		No	No	No	No	No	No	No	No	No	No	0	No	0	No	0	No	0	No	No;No;No;No;No;No;No;No;No	Asymptomatic	Personal vehicle	Private	Never	No	Never	No	Vegetarian	V
1202	0.065	0	Negative	Male	Staff	51	Service	S	O+	O	Positive	Yes	Yes	No	No	No	No	No	No		No	No	No	No	No	No		SU		SU	1	No	1	No	0	No	0	No	No;No;No;SU;SU;No;No;No;No	Asymptomatic	Personal vehicle	Private	Never	No	Never	No	Non vegetarian	NV
1203	0.063	0	Negative	Female	Staff	31	Working in CSIR-CEERI as Permanent employee	S	O+	O	Positive	No	No	No	No	No	No	No	No		No	No	No	No	No	No	No	No	No	No	0	No	0	No	0	No	0	No	No;No;No;No;No;No;No;No;No	Asymptomatic	Personal vehicle	Private	Never	No	Never	No	Vegetarian	V
1204	0.064	0	Negative	Male	Staff	32	Senior Scientist	S	O+	O	Positive	No	No	No	No	No	No	No	No		No	No	No	No	No	No	No	No	No	No	2	No	1	No	2	No	0	No	No;No;No;No;No;No;No;No;No	Asymptomatic	Personal vehicle	Private	Never	No	Never	No	Vegetarian	V
1205	0.061	0	Negative	Male	Staff	54	WORKING IN DIRECTOR OFFICE AS PERMANENT EMPLOYEE	S	O+	O	Positive	No	No	No	No	No	No	No	No		No	No	No	No	No	No	No	No	No	No	0	No	0	No	0	No	0	No	No;No;No;No;No;No;No;No;No	Asymptomatic	Personal vehicle	Private	Never	No	Never	No	Vegetarian	V
1206	0.059	0	Negative	Male	Staff	55	Working in CSIR-CEERI, Pilani	S	AB+	AB	Positive	No	No	Yes	Yes	No	No	No	No		No	No	No	No	No	No	No	No	No	No	0	No	0	No	0	No	0	No	No;No;No;No;No;No;No;No;No	Asymptomatic	Personal vehicle	Private	Never	No	Occasionally	Occ	Vegetarian	V
1207	0.063	0	Negative	Female	Others	45	House-wife	S	O+	O	Positive	No	No	No	No	No	No	No	No		No	No	No	No	No	No	No	No	No	No	0	No	1	No	0	No	0	No	No;No;No;No;No;No;No;No;No	Asymptomatic	Personal vehicle	Private	Never	No	Never	No	Non vegetarian	NV
1208	0.063	0	Negative	Female	Student	19	Student	S	O+	O	Positive	No	No	No	No	No	No	No	No		No	No	No	No	No	No	No	No	No	No	0	No	0	No	0	No	0	No	No;No;No;No;No;No;No;No;No	Asymptomatic	Personal vehicle	Private	Never	No	Never	No	Non vegetarian	NV
1209	0.06	0	Negative	Male	Staff	54	Service	S	A+	A	Positive	No	No	Yes	Yes	No	No	No	No		No	No	No	No	No	No	No	No	No	No	2	No	0	No	0	No	0	No	No;No;No;No;No;No;No;No;No	Asymptomatic	Personal vehicle	Private	Never	No	Occasionally	Occ	Occasionally non veg	NV
1210	0.069	0	Negative	Male	Staff	50	Govt. Job	S	A+	A	Positive	Yes	Yes	No	No	No	No	Yes	Yes	Negative	No	No	No	No	No	No	No	No	No	No	5	Yes	0	No	0	No	0	No	No;No;No;No;No;Yes;No;No;No	Symptomatic	Personal vehicle	Private	Never	No	Occasionally	Occ	Non vegetarian	NV
1211	0.061	0	Negative	Male	Contractual Staff	31	SPF	S	O+	O	Positive	No	No	No	No	No	No	No	No		No	No	No	No	No	No	No	No	No	No	1	No	0	No	0	No	0	No	No;No;No;No;No;No;No;No;No	Asymptomatic	Personal vehicle	Private	Regular	Yes	Occasionally	Occ	Vegetarian	V
1212	0.064	0	Negative	Male	Staff	30	Scientist	S	A+	A	Positive	No	No	No	No	No	No	No	No		No	No	No	No	No	No	No	No	No	No	1	No	0	No	0	No	0	No	No;No;No;No;No;No;No;No;No	Asymptomatic	Personal vehicle	Private	Never	No	Never	No	Vegetarian	V
1213	0.063	0	Negative	Male	Staff	58	Service	S	O+	O	Positive	No	No	No	No	No	No	No	No		No	No	No	No	No	No	No	No	No	No	0	No	0	No	0	No	0	No	No;No;No;No;No;No;No;No;No	Asymptomatic	Personal vehicle	Private	Never	No	Never	No	Vegetarian	V
1214	0.058	0	Negative	Male	Staff	40	Service	S	B+	B	Positive	No	No	No	No	No	No	No	No		No	No	No	No	No	No	No	No	No	No	1	No	1	No	1	No	0	No	No;No;No;No;No;No;No;No;No	Asymptomatic	Personal vehicle	Private	Never	No	Occasionally	Occ	Non vegetarian	NV
1215	0.059	0	Negative	Male	Staff	34	Govt job	S	A+	A	Positive	No	No	No	No	No	No	No	No		No	No	No	No	No	No	No	No	No	No	0	No	0	No	0	No	0	No	No;No;No;No;No;No;No;No;No	Asymptomatic	Personal vehicle	Private	Never	No	Never	No	Vegetarian	V
1216	0.081	0	Negative	Male	Contractual Staff	60	Guard	OS		SU	SU	No	No	No	No	No	No	No	No		No	No	No	No	No	No		SU		SU	0	No	0	No	0	No	0	No	No;No;No;SU;SU;No;No;No;No	Asymptomatic	Personal vehicle	Private	Never	No	Never	No	Vegetarian	V
1217	0.062	0	Negative	Male	Contractual Staff	42	Security Guard	OS	A+	A	Positive	No	No	No	No	No	No	No	No		No	No	No	No	No	No	No	No	No	No	0	No	0	No	0	No	0	No	No;No;No;No;No;No;No;No;No	Asymptomatic	Personal vehicle	Private	Never	No	Never	No	Vegetarian	V
1218	0.069	0	Negative	Male	Contractual Staff	55	Security guard	OS	O+	O	Positive	No	No	No	No	No	No	No	No		No	No	No	No	No	No	No	No	No	No	0	No	0	No	0	No	0	No	No;No;No;No;No;No;No;No;No	Asymptomatic	Personal vehicle	Private	Never	No	Never	No	Vegetarian	V
1219	0.064	0	Negative	Male	Others	53	Labourer	OS	B+	B	Positive	No	No	No	No	No	No	No	No		No	No	No	No	No	No	No	No	No	No	0	No	0	No	0	No	0	No	No;No;No;No;No;No;No;No;No	Asymptomatic	cycle	Private	Regular	Yes	Occasionally	Occ	Occasionally non veg	NV
1220	0.073	0	Negative	Male	Contractual Staff	41	Security Guard	OS		SU	SU	No	No	No	No	No	No	No	No		No	No	No	No	No	No		SU		SU	0	No	0	No	0	No	0	No	No;No;No;SU;SU;No;No;No;No	Asymptomatic	Personal vehicle	Private	Regular	Yes	Never	No	Vegetarian	V
1221	0.067	0	Negative	Male	Contractual Staff	50	Security guard	OS		SU	SU	No	No	No	No	No	No	No	No		No	No	No	No	No	No	No	No	No	No	0	No	0	No	0	No	0	No	No;No;No;No;No;No;No;No;No	Asymptomatic	Personal vehicle	Private	Never	No	Never	No	Vegetarian	V
1222	0.062	0	Negative	Male	Contractual Staff	34	Sweeper	OS		SU	SU	No	No	No	No	No	No	No	No		No	No	No	No	No	No		SU		SU	0	No	0	No	0	No	0	No	No;No;No;SU;SU;No;No;No;No	Asymptomatic	Personal vehicle	Private	Never	No	Never	No	Non vegetarian	NV
1223	0.062	0	Negative	Male	Contractual Staff	30	Sweeper	OS	AB+	AB	Positive	No	No	No	No	No	No	No	No		No	No	No	No	No	No	No	No	No	No	1	No	0	No	0	No	0	No	No;No;No;No;No;No;No;No;No	Asymptomatic	Personal vehicle	Private	Sporadic	Yes	Never	No	Non vegetarian	NV
1224	0.067	0	Negative	Female	Others	34	House wife	S	AB+	AB	Positive	Yes	Yes	No	No	No	No	No	No		No	No	No	No	No	No	No	No	No	No	0	No	1	No	0	No	0	No	No;No;No;No;No;No;No;No;No	Asymptomatic	Personal vehicle	Private	Never	No	Never	No	Vegetarian	V
1225	0.064	0	Negative	Male	Faculty	44	Scientist	S	O+	O	Positive	No	No	No	No	No	No	No	No		No	No	No	No	No	No	No	No	No	No	1	No	0	No	0	No	0	No	No;No;No;No;No;No;No;No;No	Asymptomatic	Personal vehicle	Private	Never	No	Never	No	Vegetarian	V
1226	0.064	0	Negative	Male	Contractual Staff	28	Sweeper	OS		SU	SU	No	No	No	No	No	No	No	No		No	No	No	No	No	No		SU		SU	0	No	0	No	0	No	0	No	No;No;No;SU;SU;No;No;No;No	Asymptomatic	Personal vehicle	Private	Never	No	Never	No	Non vegetarian	NV
1227	0.061	0	Negative	Male	Faculty	47	Scientist	S	B+	B	Positive	Yes	Yes	No	No	No	No	No	No		No	No	No	No	No	No	No	No	No	No	1	No	1	No	1	No	0	No	No;No;No;No;No;No;No;No;No	Asymptomatic	Personal vehicle	Private	Regular	Yes	Never	No	Occasionally non veg	NV
1228	0.065	0	Negative	Female	Others	38	H/W	S	B+	B	Positive	No	No	No	No	No	No	No	No		No	No	No	No	No	No	No	No	No	No	0	No	0	No	0	No	0	No	No;No;No;No;No;No;No;No;No	Asymptomatic	Personal vehicle	Private	Never	No	Never	No	Vegetarian	V
1229	0.063	0	Negative	Female	Others	53	Housewife	S		SU	SU	No	No	No	No	No	No	No	No		No	No	No	No	No	No	Yes	Yes	No	No	1	No	1	No	0	No	0	No	No;No;No;Yes;No;No;No;No;No	Symptomatic	Personal vehicle	Private	Never	No	Never	No	Vegetarian	V
1230	0.062	0	Negative	Male	Contractual Staff	55	Security Guard	OS		SU	SU	No	No	No	No	No	No	No	No		No	No	No	No	No	No		SU		SU	0	No	0	No	0	No	0	No	No;No;No;SU;SU;No;No;No;No	Asymptomatic	Personal vehicle	Private	Never	No	Never	No	Vegetarian	V
1231	0.063	0	Negative	Female	Others	47	House wife	S	B+	B	Positive	No	No	Yes	Yes	No	No	No	No		No	No	No	No	No	No	No	No	No	No	1	No	1	No	1	No	0	No	No;No;No;No;No;No;No;No;No	Asymptomatic	Personal vehicle	Private	Never	No	Never	No	Occasionally non veg	NV
1232	0.063	0	Negative	Male	Faculty	59	Scientist	S	B+	B	Positive	No	No	No	No	No	No	No	No		No	No	No	No	No	No	No	No	No	No	2	No	1	No	0	No	0	No	No;No;No;No;No;No;No;No;No	Asymptomatic	Personal vehicle	Private	Never	No	Occasionally	Occ	Occasionally non veg	NV
1233	1.18	1	Positive	Male	Staff	37	Govt. Job	S	O-	O	Negative	No	No	No	No	No	No	No	No		Yes	Yes	Yes	Yes	Yes	Yes	No	No	No	No	1	No	0	No	0	No	0	No	Yes;Yes;Yes;No;No;No;No;No;No	Symptomatic	Personal vehicle	Private	Sporadic	Yes	Often	Yes	Occasionally non veg	NV
1234	0.062	0	Negative	Male	Staff	39	Sr. Scientist	S		SU	SU	No	No	No	No	No	No	No	No		No	No	No	No	No	No		SU		SU	1	No	0	No	0	No	0	No	No;No;No;SU;SU;No;No;No;No	Asymptomatic	Personal vehicle	Private	Never	No	Occasionally	Occ	Non vegetarian	NV
1235	0.061	0	Negative	Male	Contractual Staff	50	Security Guard	OS		SU	SU	No	No	No	No	No	No	No	No		No	No	No	No	No	No	No	No		SU	0	No	0	No	0	No	0	No	No;No;No;No;SU;No;No;No;No	Asymptomatic	Personal vehicle	Private	Regular	Yes	Never	No	Non vegetarian	NV
1236	0.064	0	Negative	Male	Others	30	Labourer	OS		SU	SU	No	No	No	No	No	No	No	No		No	No	No	No	No	No	No	No	No	No	0	No	0	No	0	No	0	No	No;No;No;No;No;No;No;No;No	Asymptomatic	cycle	Private	Never	No	Never	No	Vegetarian	V
1237	0.062	0	Negative	Male	Contractual Staff	37	Security Guard	OS		SU	SU	No	No	No	No	No	No	No	No		No	No	No	No	No	No		SU		SU	0	No	0	No	0	No	0	No	No;No;No;SU;SU;No;No;No;No	Asymptomatic	Personal vehicle	Private	Never	No	Never	No	Vegetarian	V
1238	0.063	0	Negative	Female	Others	49	H/W	S		SU	SU	No	No	No	No	No	No	No	No		No	No	No	No	No	No	No	No	No	No	0	No	0	No	0	No	0	No	No;No;No;No;No;No;No;No;No	Asymptomatic	Personal vehicle	Private	Never	No	Never	No	Vegetarian	V
1239	0.064	0	Negative	Male	Staff	38	CSIR Service	S	O+	O	Positive	No	No	No	No	No	No	No	No		No	No	No	No	No	No	No	No	No	No	0	No	0	No	0	No	0	No	No;No;No;No;No;No;No;No;No	Asymptomatic	Personal vehicle	Private	Never	No	Never	No	Vegetarian	V
1240	0.065	0	Negative	Female	Others	51	House wife	S	AB+	AB	Positive	No	No	No	No	No	No	No	No		No	No	No	No	No	No	No	No	No	No	1	No	1	No	0	No	0	No	No;No;No;No;No;No;No;No;No	Asymptomatic	Personal vehicle	Private	Never	No	Never	No	Vegetarian	V
1241	0.062	0	Negative	Female	Others	29	SPF	S		SU	SU	No	No	No	No	No	No	No	No		No	No	No	No	No	No		SU		SU	1	No	0	No	0	No	0	No	No;No;No;SU;SU;No;No;No;No	Asymptomatic	Personal vehicle	Private	Never	No	Never	No	Vegetarian	V
1242	1.49	1	Positive	Female	Others	31	House wifw	S	A+	A	Positive	No	No	No	No	No	No	No	No		No	No	Yes	Yes	No	No	No	No	No	No	1	No	1	No	0	No	0	No	No;Yes;No;No;No;No;No;No;No	Symptomatic	Personal vehicle	Private	Never	No	Never	No	Vegetarian	V
1243	0.067	0	Negative	Male	Staff	44	Scientist	S	AB+	AB	Positive	No	No	No	No	No	No	No	No		No	No	No	No	No	No	No	No	No	No	2	No	0	No	1	No	0	No	No;No;No;No;No;No;No;No;No	Asymptomatic	Personal vehicle	Private	Sporadic	Yes	Occasionally	Occ	Non vegetarian	NV
1244	0.075	0	Negative	Male	Staff	44	Service	S	B+	B	Positive	No	No	No	No	No	No	No	No		No	No	No	No	No	No	No	No	No	No	1	No	1	No	0	No	0	No	No;No;No;No;No;No;No;No;No	Asymptomatic	Personal vehicle	Private	Never	No	Never	No	Occasionally non veg	NV
1245	0.063	0	Negative	Male	Staff	39	CSIR STAFF	S	B+	B	Positive	No	No	No	No	No	No	No	No		No	No	No	No	No	No	No	No	No	No	0	No	0	No	0	No	0	No	No;No;No;No;No;No;No;No;No	Asymptomatic	Personal vehicle	Private	Never	No	Never	No	Non vegetarian	NV
1246	0.069	0	Negative	Female	Student	24	study	S	A-	A	Negative	No	No	No	No	No	No	No	No		No	No	Yes	Yes	No	No	No	No	No	No	1	No	0	No	0	No	0	No	No;Yes;No;No;No;No;No;No;No	Symptomatic	Personal vehicle	Private	Never	No	Never	No	Vegetarian	V
1247	0.063	0	Negative	Male	Faculty	30	Scientist	S	A+	A	Positive	No	No	Yes	Yes	No	No	No	No		No	No	No	No	No	No	No	No	No	No	1	No	0	No	1	No	1	No	No;No;No;No;No;No;No;No;No	Asymptomatic	Cycle	Private	Never	No	Never	No	Non vegetarian	NV
1248	0.065	0	Negative	Male	Student	28	PhD student (AcSIR)	S	B+	B	Positive	No	No	No	No	No	No	No	No		No	No	No	No	Yes	Yes	No	No	No	No	2	No	1	No	0	No	0	No	No;No;Yes;No;No;No;No;No;No	Symptomatic	Personal vehicle	Private	Never	No	Never	No	Occasionally non veg	NV
1249	0.062	0	Negative	Female	Others	36	Housewife	S	B+	B	Positive	No	No	No	No	No	No	No	No		No	No	No	No	No	No	No	No	No	No	0	No	0	No	0	No	0	No	No;No;No;No;No;No;No;No;No	Asymptomatic	Personal vehicle	Private	Never	No	Never	No	Vegetarian	V
1250	0.062	0	Negative	Male	Staff	59	Service	S	O+	O	Positive	No	No	Yes	Yes	No	No	No	No		No	No	No	No	No	No	No	No	No	No	0	No	1	No	0	No	0	No	No;No;No;No;No;No;No;No;No	Asymptomatic	Personal vehicle	Private	Never	No	Never	No	Vegetarian	V
1251	0.063	0	Negative	Male	Staff	26	Government Employee	S	O+	O	Positive	No	No	No	No	No	No	No	No		No	No	No	No	No	No		SU		SU	0	No	0	No	0	No	0	No	No;No;No;SU;SU;No;No;No;No	Asymptomatic	Personal vehicle	Private	Never	No	Never	No	Vegetarian	V
1252	0.098	0	Negative	Male	Others	59	Gardener	OS	B+	B	Positive	Yes	Yes	No	No	No	No	No	No		No	No	No	No	No	No	No	No	No	No	1	No	0	No	0	No	0	No	No;No;No;No;No;No;No;No;No	Asymptomatic	Personal vehicle	Private	Regular	Yes	Never	No	Occasionally non veg	NV
1253	0.067	0	Negative	Female	Student	27	Project Assistant at CEERI Pilani	S	O+	O	Positive	No	No	No	No	No	No	No	No		No	No	No	No	No	No	No	No	No	No	3	Yes	1	No	2	No	1	No	No;No;No;No;No;Yes;No;No;No	Symptomatic	Personal vehicle	Private	Never	No	Never	No	Vegetarian	V
1254	0.062	0	Negative	Female	Others	56	Housewife	S	O+	O	Positive	Yes	Yes	Yes	Yes	No	No	No	No		No	No	No	No	No	No	No	No	No	No	2	No	2	No	0	No	1	No	No;No;No;No;No;No;No;No;No	Asymptomatic	Personal vehicle	Private	Never	No	Never	No	Vegetarian	V
1255	0.061	0	Negative	Male	Contractual Staff	45	Contractual Staff	OS		SU	SU	No	No	No	No	No	No	No	No		No	No	No	No	No	No	No	No	No	No	0	No	0	No	0	No	0	No	No;No;No;No;No;No;No;No;No	Asymptomatic	Personal vehicle	Private	Never	No	Never	No	Non vegetarian	NV
1256	0.07	0	Negative	Male	Staff	31	researcher	S	B+	B	Positive	No	No	No	No	No	No	No	No		No	No	No	No	No	No	No	No	No	No	1	No	0	No	0	No	0	No	No;No;No;No;No;No;No;No;No	Asymptomatic	Personal vehicle	Private	Never	No	Never	No	Vegetarian	V
1257	0.062	0	Negative	Male	Contractual Staff	22	Plumber	OS	O+	O	Positive	No	No	No	No	No	No	No	No		No	No	No	No	No	No	No	No	No	No	0	No	0	No	0	No	0	No	No;No;No;No;No;No;No;No;No	Asymptomatic	Personal vehicle	Private	Never	No	Never	No	Non vegetarian	NV
1258	0.061	0	Negative	Male	Staff	38	service	S		SU	SU	No	No	No	No	No	No	No	No		No	No	No	No	No	No	No	No	No	No	0	No	0	No	0	No	0	No	No;No;No;No;No;No;No;No;No	Asymptomatic	Personal vehicle	Private	Never	No	Often	Yes	Occasionally non veg	NV
1259	0.063	0	Negative	Male	Staff	27	CSIR Service	S		SU	SU	No	No	No	No	No	No	No	No		No	No	No	No	No	No	No	No	No	No	0	No	0	No	0	No	0	No	No;No;No;No;No;No;No;No;No	Asymptomatic	Personal vehicle	Private	Never	No	Never	No	Vegetarian	V
1260	0.062	0	Negative	Male	Staff	57	Service	S	O+	O	Positive	No	No	No	No	No	No	No	No		No	No	No	No	No	No	No	No	No	No	0	No	0	No	0	No	0	No	No;No;No;No;No;No;No;No;No	Asymptomatic	Personal vehicle	Private	Regular	Yes	Occasionally	Occ	Occasionally non veg	NV
1261	0.064	0	Negative	Male	Contractual Staff	60	Security Guard	OS		SU	SU	No	No	No	No	No	No	No	No		No	No	No	No	No	No		SU		SU	0	No	0	No	0	No	0	No	No;No;No;SU;SU;No;No;No;No	Asymptomatic	Personal vehicle	Private	Regular	Yes	Never	No	Vegetarian	V
1262	1.32	1	Positive	Male	Contractual Staff	28	Contractual Staff	OS	B+	B	Positive	No	No	No	No	No	No	No	No		No	No	No	No	No	No	No	No	No	No	0	No	0	No	0	No	0	No	No;No;No;No;No;No;No;No;No	Asymptomatic	Personal vehicle	Private	Never	No	Never	No	Non vegetarian	NV
1263	0.059	0	Negative	Male	Contractual Staff	22	Contractual staff	OS	B+	B	Positive	No	No	No	No	No	No	No	No		No	No	No	No	No	No	No	No	No	No	0	No	0	No	0	No	0	No	No;No;No;No;No;No;No;No;No	Asymptomatic	cycle	Private	Never	No	Never	No	Occasionally non veg	NV
1264	0.064	0	Negative	Male	Contractual Staff	42	Security Guard	OS		SU	SU	No	No	No	No	No	No	No	No		No	No	No	No	No	No		SU		SU	0	No	0	No	0	No	0	No	No;No;No;SU;SU;No;No;No;No	Asymptomatic	Personal vehicle	Private	Regular	Yes	Never	No	Vegetarian	V
1265	0.061	0	Negative	Female	Faculty	46	Teacher	S	O+	O	Positive	No	No	No	No	No	No	No	No		No	No	No	No	No	No	No	No	No	No	0	No	0	No	0	No	0	No	No;No;No;No;No;No;No;No;No	Asymptomatic	Personal vehicle	Private	Never	No	Never	No	Vegetarian	V
1266	0.065	0	Negative	Female	Others	73	House Wife	S		SU	SU	No	No	No	No	No	No	No	No		No	No	No	No	No	No	No	No	No	No	0	No	0	No	0	No	0	No	No;No;No;No;No;No;No;No;No	Asymptomatic	Personal vehicle	Private	Never	No	Never	No	Vegetarian	V
1267	0.061	0	Negative	Male	Contractual Staff	22	Contractual staff	OS		SU	SU	No	No	No	No	No	No	No	No		No	No	No	No	No	No	No	No	No	No	0	No	0	No	0	No	0	No	No;No;No;No;No;No;No;No;No	Asymptomatic	cycle	Private	Never	No	Never	No	Vegetarian	V
1268	0.064	0	Negative	Male	Contractual Staff	22	Attendent	OS	O+	O	Positive	No	No	No	No	No	No	No	No		No	No	No	No	No	No	No	No	No	No	0	No	0	No	0	No	0	No	No;No;No;No;No;No;No;No;No	Asymptomatic	Personal vehicle	Private	Never	No	Never	No	Vegetarian	V
1269	0.061	0	Negative	Male	Staff	40	security gaurd	OS		SU	SU	No	No	No	No	No	No	No	No		No	No	No	No	No	No	No	No	No	No	1	No	0	No	0	No	0	No	No;No;No;No;No;No;No;No;No	Asymptomatic	Personal vehicle	Private	Never	No	Never	No	Vegetarian	V
1270	0.06	0	Negative	Male	Student	20	student	S		SU	SU	No	No	No	No	No	No	No	No		No	No	No	No	No	No	No	No	No	No	0	No	0	No	0	No	0	No	No;No;No;No;No;No;No;No;No	Asymptomatic	Personal vehicle	Private	Never	No	Never	No	Vegetarian	V
1271	0.07	0	Negative	Male	Contractual Staff	24	Attendent	OS	B+	B	Positive	No	No	No	No	No	No	No	No		No	No	No	No	No	No	No	No	No	No	0	No	0	No	0	No	0	No	No;No;No;No;No;No;No;No;No	Asymptomatic	Personal vehicle	Private	Never	No	Never	No	Non vegetarian	NV
1272	0.06	0	Negative	Male	Staff	57	security gaurd	OS		SU	SU	No	No	No	No	No	No	No	No		No	No	No	No	No	No	No	No	No	No	0	No	0	No	0	No	0	No	No;No;No;No;No;No;No;No;No	Asymptomatic	Personal vehicle	Private	Never	No	Occasionally	Occ	Occasionally non veg	NV
1273	0.059	0	Negative	Female	Student	22	student	S	O+	O	Positive	No	No	No	No	No	No	No	No		No	No	No	No	No	No	No	No	No	No	0	No	0	No	0	No	0	No	No;No;No;No;No;No;No;No;No	Asymptomatic	Personal vehicle	Private	Never	No	Never	No	Vegetarian	V
1274	0.068	0	Negative	Male	Staff	55	security gaurd	OS	O+	O	Positive	No	No	No	No	No	No	No	No		No	No	No	No	No	No	No	No	No	No	0	No	0	No	0	No	0	No	No;No;No;No;No;No;No;No;No	Asymptomatic	Personal vehicle	Private	Sporadic	Yes	Occasionally	Occ	Occasionally non veg	NV
1275	0.06	0	Negative	Male	Staff	46	Govt. Job	S	AB+	AB	Positive	No	No	No	No	No	No	No	No		No	No	No	No	No	No	No	No	No	No	1	No	0	No	1	No	0	No	No;No;No;No;No;No;No;No;No	Asymptomatic	Personal vehicle	Private	Never	No	Never	No	Vegetarian	V
1276	0.092	0	Negative	Male	Staff	53	GOVT JOB	S	B+	B	Positive	No	No	No	No	No	No	No	No		No	No	No	No	No	No	No	No	No	No	0	No	0	No	0	No	0	No	No;No;No;No;No;No;No;No;No	Asymptomatic	Personal vehicle	Private	Never	No	Never	No	Vegetarian	V
1277	0.06	0	Negative	Male	Staff	50	security gaurd	OS	A+	A	Positive	No	No	No	No	No	No	No	No		No	No	No	No	No	No	No	No	No	No	0	No	0	No	0	No	0	No	No;No;No;No;No;No;No;No;No	Asymptomatic	Personal vehicle	Private	Never	No	Never	No	Vegetarian	V
1278	0.063	0	Negative	Male	Others	31	SCIENTIST	S	A+	A	Positive	No	No	No	No	No	No	No	No		No	No	No	No	No	No	No	No	No	No	0	No	0	No	0	No	0	No	No;No;No;No;No;No;No;No;No	Asymptomatic	Personal vehicle	Private	Never	No	Never	No	Non vegetarian	NV
1279	0.062	0	Negative	Male	Staff	39	GOVERNMENT EMPLOYEE	S	B+	B	Positive	No	No	No	No	No	No	No	No		No	No	No	No	No	No	No	No	No	No	0	No	0	No	0	No	0	No	No;No;No;No;No;No;No;No;No	Asymptomatic	Personal vehicle	Private	Never	No	Never	No	Occasionally non veg	NV
1280	0.071	0	Negative	Female	Others	48	house wife	S		SU	SU	No	No	No	No	No	No	No	No		No	No	No	No	No	No	No	No	No	No	0	No	0	No	0	No	0	No	No;No;No;No;No;No;No;No;No	Asymptomatic	Personal vehicle	Private	Never	No	Never	No	Vegetarian	V
1281	0.061	0	Negative	Male	Staff	34	Service	S	A-	A	Negative	No	No	No	No	No	No	No	No		No	No	No	No	No	No	No	No	No	No	1	No	0	No	0	No	0	No	No;No;No;No;No;No;No;No;No	Asymptomatic	Personal vehicle	Private	Sporadic	Yes	Occasionally	Occ	Occasionally non veg	NV
1282	0.061	0	Negative	Female	Others	20	student	S	B-	B	Negative	No	No	No	No	No	No	No	No		No	No	No	No	No	No	No	No	No	No	0	No	0	No	0	No	0	No	No;No;No;No;No;No;No;No;No	Asymptomatic	Personal vehicle	Private	Never	No	Never	No	Vegetarian	V
1283	0.063	0	Negative	Male	Contractual Staff	52	Security Guard	OS		SU	SU	No	No	No	No	No	No	No	No		No	No	No	No	No	No		SU		SU	0	No	0	No	0	No	0	No	No;No;No;SU;SU;No;No;No;No	Asymptomatic	Personal vehicle	Private	Never	No	Never	No	Vegetarian	V
1284	0.064	0	Negative	Male	Others	26	student	S		SU	SU	No	No	No	No	No	No	No	No		No	No	No	No	No	No	No	No	No	No	0	No	0	No	0	No	0	No	No;No;No;No;No;No;No;No;No	Asymptomatic	Personal vehicle	Private	Never	No	Never	No	Vegetarian	V
1285	0.061	0	Negative	Female	Others	34	house wife	S	B+	B	Positive	No	No	No	No	No	No	No	No		No	No	No	No	No	No	No	No	No	No	0	No	0	No	0	No	0	No	No;No;No;No;No;No;No;No;No	Asymptomatic	Personal vehicle	Private	Never	No	Never	No	Vegetarian	V
1286	0.064	0	Negative	Male	Staff	56	security gaurd	OS		SU	SU	No	No	No	No	No	No	No	No		No	No	No	No	No	No	No	No	No	No	0	No	0	No	0	No	0	No	No;No;No;No;No;No;No;No;No	Asymptomatic	Personal vehicle	Private	Never	No	Never	No	Vegetarian	V
1287	0.063	0	Negative	Male	Contractual Staff	46	Security Guard	OS		SU	SU	No	No	No	No	No	No	No	No		No	No	No	No	No	No		SU		SU	0	No	0	No	0	No	0	No	No;No;No;SU;SU;No;No;No;No	Asymptomatic	Personal vehicle	Private	Sporadic	Yes	Never	No	Vegetarian	V
1288	0.128	0	Negative	Male	Contractual Staff	27	eme	OS	AB+	AB	Positive	No	No	No	No	No	No	No	No		No	No	No	No	No	No	No	No	No	No	0	No	0	No	0	No	0	No	No;No;No;No;No;No;No;No;No	Asymptomatic	Personal vehicle	Private	Never	No	Never	No	Vegetarian	V
1289	0.066	0	Negative	Female	Others	33	Teaching	S	O+	O	Positive	No	No	Yes	Yes	No	No	No	No		No	No	No	No	No	No	No	No	No	No	2	No	5	Yes	4	Yes	0	No	No;No;No;No;No;No;Yes;Yes;No	Symptomatic	Personal vehicle	Private	Never	No	Never	No	Vegetarian	V
1290	0.061	0	Negative	Male	Staff	39	SERVICE	S	O+	O	Positive	No	No	No	No	No	No	No	No		No	No	No	No	No	No	No	No	No	No	3	Yes	0	No	1	No	0	No	No;No;No;No;No;Yes;No;No;No	Symptomatic	Personal vehicle	Private	Never	No	Never	No	Vegetarian	V
1291	0.062	0	Negative	Female	Staff	39	SERVICE	S	B+	B	Positive	No	No	No	No	No	No	No	No		No	No	No	No	No	No	No	No	No	No	2	No	1	No	0	No	0	No	No;No;No;No;No;No;No;No;No	Asymptomatic	Personal vehicle	Private	Never	No	Never	No	Vegetarian	V
1292	6.77	1	Positive	Male	Staff	57	Service	S	AB-	AB	Negative	No	No	No	No	No	No	No	No		No	No	No	No	No	No	No	No	No	No	0	No	0	No	0	No	0	No	No;No;No;No;No;No;No;No;No	Asymptomatic	Personal vehicle	Private	Never	No	Never	No	Vegetarian	V
1293	0.063	0	Negative	Male	Staff	58	Service	S	A+	A	Positive	No	No	No	No	No	No	No	No		No	No	No	No	No	No	No	No	No	No	1	No	0	No	0	No	0	No	No;No;No;No;No;No;No;No;No	Asymptomatic	Personal vehicle	Private	Never	No	Never	No	Vegetarian	V
1294	0.649	0	Negative	Male	Staff	36	TECHNICAL OFFICER	S	B+	B	Positive	No	No	No	No	No	No	No	No		No	No	No	No	No	No	No	No	No	No	1	No	0	No	1	No	0	No	No;No;No;No;No;No;No;No;No	Asymptomatic	Cab	Public	Never	No	Never	No	Vegetarian	V
1295	0.062	0	Negative	Male	Staff	38	R&D	S	B+	B	Positive	No	No	No	No	No	No	No	No		No	No	No	No	No	No	No	No	No	No	0	No	0	No	0	No	0	No	No;No;No;No;No;No;No;No;No	Asymptomatic	Personal vehicle	Private	Never	No	Never	No	Vegetarian	V
1296	0.066	0	Negative	Male	Contractual Staff	37	gardener	OS	AB+	AB	Positive	No	No	No	No	No	No	No	No		No	No	No	No	No	No	No	No	No	No	0	No	0	No	0	No	0	No	No;No;No;No;No;No;No;No;No	Asymptomatic	Personal vehicle	Private	Sporadic	Yes	Never	No	Vegetarian	V
1297	0.062	0	Negative	Male	Contractual Staff	37	Security Guard	OS		SU	SU	No	No	No	No	No	No	No	No		No	No	No	No	No	No		SU		SU	0	No	0	No	0	No	0	No	No;No;No;SU;SU;No;No;No;No	Asymptomatic	Personal vehicle	Private	Never	No	Never	No	Vegetarian	V
1298	0.072	0	Negative	Male	Contractual Staff	49	Security Guard	OS		SU	SU	No	No	No	No	No	No	No	No		No	No	No	No	No	No		SU		SU	0	No	0	No	0	No	0	No	No;No;No;SU;SU;No;No;No;No	Asymptomatic	Personal vehicle	Private	Never	No	Never	No	Vegetarian	V
1299	0.062	0	Negative	Male	Staff	43	Scientist	S	O+	O	Positive	No	No	No	No	No	No	No	No		No	No	No	No	No	No	No	No	No	No	1	No	0	No	1	No	1	No	No;No;No;No;No;No;No;No;No	Asymptomatic	Personal vehicle	Private	Never	No	Never	No	Occasionally non veg	NV
1300	0.065	0	Negative	Male	Staff	27	PF	S		SU	SU	No	No	No	No	No	No	No	No		No	No	No	No	No	No	No	No	No	No	0	No	0	No	0	No	0	No	No;No;No;No;No;No;No;No;No	Asymptomatic	Personal vehicle	Private	Never	No	Never	No	Non vegetarian	NV
1301	0.063	0	Negative	Male	Staff	50	service	S	B+	B	Positive	No	No	No	No	No	No	No	No		No	No	No	No	No	No	No	No	No	No	1	No	0	No	0	No	0	No	No;No;No;No;No;No;No;No;No	Asymptomatic	Personal vehicle	Private	Never	No	Never	No	Vegetarian	V
1302	0.068	0	Negative	Male	Staff	44	security gaurd	OS	B+	B	Positive	No	No	No	No	No	No	No	No		No	No	No	No	No	No	No	No	No	No	0	No	0	No	0	No	0	No	No;No;No;No;No;No;No;No;No	Asymptomatic	Personal vehicle	Private	Never	No	Never	No	Vegetarian	V
1303	0.06	0	Negative	Male	Contractual Staff	27	FINANCIAL EXECUTIVE ASSISTANT	S	B+	B	Positive	No	No	No	No	No	No	No	No		No	No	No	No	No	No	No	No	No	No	4	Yes	0	No	0	No	0	No	No;No;No;No;No;Yes;No;No;No	Symptomatic	Personal vehicle	Private	Never	No	Never	No	Vegetarian	V
1304	0.065	0	Negative	Female	Faculty	40	teacher	S	A+	A	Positive	No	No	No	No	No	No	No	No		No	No	No	No	No	No	No	No	No	No	1	No	0	No	1	No	0	No	No;No;No;No;No;No;No;No;No	Asymptomatic	Personal vehicle	Private	Never	No	Never	No	Occasionally non veg	NV
1305	0.058	0	Negative	Male	Contractual Staff	45	Security Guard	OS	B+	B	Positive	No	No	No	No	No	No	No	No		No	No	No	No	No	No	No	No	No	No	0	No	0	No	0	No	0	No	No;No;No;No;No;No;No;No;No	Asymptomatic	Personal vehicle	Private	Never	No	Never	No	Vegetarian	V
1306	0.064	0	Negative	Male	Staff	59	Principal Technical Officer	S	A+	A	Positive	No	No	No	No	No	No	No	No		No	No	No	No	No	No	No	No	No	No	2	No	1	No	0	No	1	No	No;No;No;No;No;No;No;No;No	Asymptomatic	Personal vehicle	Private	Never	No	Never	No	Vegetarian	V
1307	0.063	0	Negative	Female	Others	54	HOUSE WIFE	S	A+	A	Positive	No	No	No	No	No	No	No	No		No	No	No	No	No	No	No	No	No	No	1	No	2	No	0	No	0	No	No;No;No;No;No;No;No;No;No	Asymptomatic	Personal vehicle	Private	Never	No	Never	No	Vegetarian	V
1308	0.064	0	Negative	Male	Contractual Staff	23	Safaiwala	OS	O+	O	Positive	No	No	No	No	No	No	No	No		No	No	No	No	No	No	No	No	No	No	0	No	0	No	0	No	0	No	No;No;No;No;No;No;No;No;No	Asymptomatic	Personal vehicle	Private	Never	No	Never	No	Occasionally non veg	NV
1309	0.061	0	Negative	Male	Contractual Staff	24	Housekeeper	OS	B+	B	Positive	No	No	No	No	No	No	No	No		No	No	No	No	No	No	No	No	No	No	0	No	0	No	0	No	0	No	No;No;No;No;No;No;No;No;No	Asymptomatic	Personal vehicle	Private	Never	No	Never	No	Occasionally non veg	NV
1310	0.064	0	Negative	Male	Contractual Staff	25	Housekeeper	OS	O+	O	Positive	No	No	No	No	No	No	No	No		No	No	No	No	No	No	No	No	No	No	0	No	0	No	0	No	0	No	No;No;No;No;No;No;No;No;No	Asymptomatic	Personal vehicle	Private	Never	No	Never	No	Occasionally non veg	NV
1311	0.062	0	Negative	Male	Contractual Staff	26	Housekeeper	OS	O+	O	Positive	No	No	No	No	No	No	No	No		No	No	No	No	No	No	No	No	No	No	0	No	0	No	0	No	0	No	No;No;No;No;No;No;No;No;No	Asymptomatic	Personal vehicle	Private	Never	No	Never	No	Non vegetarian	NV
1312	0.062	0	Negative	Male	Staff	42	Principal Scientist	S	A+	A	Positive	No	No	No	No	No	No	No	No		No	No	No	No	No	No	No	No	No	No	2	No	1	No	0	No	0	No	No;No;No;No;No;No;No;No;No	Asymptomatic	Personal vehicle	Private	Never	No	Occasionally	Occ	Vegetarian	V
1313	0.063	0	Negative	Male	Student	32	PhD Student	S	B+	B	Positive	No	No	No	No	No	No	No	No		No	No	No	No	No	No	No	No	No	No	0	No	0	No	0	No	0	No	No;No;No;No;No;No;No;No;No	Asymptomatic	Walking	Private	Never	No	Never	No	Occasionally non veg	NV
1314	0.064	0	Negative	Male	Staff	56	Govt Employee	S	B+	B	Positive	No	No	Yes	Yes	No	No	No	No		No	No	No	No	No	No	No	No	No	No	1	No	0	No	0	No	0	No	No;No;No;No;No;No;No;No;No	Asymptomatic	Personal vehicle	Private	Never	No	Occasionally	Occ	Vegetarian	V
1315	0.062	0	Negative	Male	Staff	32	Govt. Job	S	B+	B	Positive	No	No	No	No	No	No	No	No		No	No	No	No	No	No	No	No	No	No	0	No	0	No	0	No	0	No	No;No;No;No;No;No;No;No;No	Asymptomatic	Personal vehicle	Private	Never	No	Never	No	Non vegetarian	NV
1316	0.062	0	Negative	Male	Staff	33	J.S.A	S	B+	B	Positive	No	No	No	No	No	No	No	No		No	No	No	No	No	No	No	No	No	No	1	No	0	No	1	No	1	No	No;No;No;No;No;No;No;No;No	Asymptomatic	Personal vehicle	Private	Never	No	Occasionally	Occ	Vegetarian	V
1317	0.073	0	Negative	Male	Staff	37	GOVT SERVICE	S	A+	A	Positive	No	No	No	No	No	No	No	No		No	No	No	No	No	No	No	No	No	No	1	No	0	No	0	No	0	No	No;No;No;No;No;No;No;No;No	Asymptomatic	Personal vehicle	Private	Never	No	Occasionally	Occ	Vegetarian	V
1318	0.066	0	Negative	Male	Contractual Staff	29	Project Assistant	S		SU	SU	No	No	No	No	No	No	No	No		Yes	Yes	Yes	Yes	Yes	Yes	No	No	No	No	3	Yes	1	No	3	Yes	0	No	Yes;Yes;Yes;No;No;Yes;No;Yes;No	Symptomatic	Personal vehicle	Private	Never	No	Occasionally	Occ	Occasionally non veg	NV
1319	0.064	0	Negative	Female	Student	25	student	S	B+	B	Positive	No	No	No	No	No	No	No	No		No	No	No	No	No	No	No	No	No	No	0	No	0	No	0	No	0	No	No;No;No;No;No;No;No;No;No	Asymptomatic	cycle	Private	Never	No	Never	No	Vegetarian	V
1320	0.065	0	Negative	Male	Contractual Staff	24	Research	S	A+	A	Positive	No	No	No	No	No	No	No	No		No	No	No	No	No	No	No	No	No	No	2	No	2	No	3	Yes	0	No	No;No;No;No;No;No;No;Yes;No	Symptomatic	Walking	Private	Never	No	Never	No	Occasionally non veg	NV
1321	0.062	0	Negative	Male	Staff	33	Technical Officer	S	B+	B	Positive	No	No	No	No	No	No	No	No		No	No	No	No	No	No	No	No	No	No	1	No	0	No	0	No	0	No	No;No;No;No;No;No;No;No;No	Asymptomatic	Personal vehicle	Private	Never	No	Never	No	Vegetarian	V
1322	0.064	0	Negative	Male	Staff	30	Government Job	S	B+	B	Positive	No	No	No	No	No	No	No	No		No	No	No	No	No	No	No	No	No	No	2	No	2	No	1	No	0	No	No;No;No;No;No;No;No;No;No	Asymptomatic	Personal vehicle	Private	Regular	Yes	Occasionally	Occ	Occasionally non veg	NV
1323	0.065	0	Negative	Male	Staff	36	Scientist	S	O+	O	Positive	No	No	No	No	No	No	No	No		No	No	No	No	No	No	No	No	No	No	1	No	0	No	0	No	0	No	No;No;No;No;No;No;No;No;No	Asymptomatic	Personal vehicle	Private	Never	No	Never	No	Vegetarian	V
1324	0.062	0	Negative	Male	Contractual Staff	21	Contract Worker	OS	AB+	AB	Positive	No	No	No	No	No	No	No	No		No	No	No	No	No	No	No	No	No	No	0	No	0	No	0	No	0	No	No;No;No;No;No;No;No;No;No	Asymptomatic	Personal vehicle	Private	Never	No	Never	No	Vegetarian	V
1325	0.065	0	Negative	Female	Others	32	House Wife	S	A+	A	Positive	No	No	No	No	No	No	No	No		No	No	No	No	No	No	No	No	No	No	1	No	0	No	0	No	0	No	No;No;No;No;No;No;No;No;No	Asymptomatic	Personal vehicle	Private	Never	No	Never	No	Vegetarian	V
1326	0.066	0	Negative	Male	Faculty	41	Scientist	S	A+	A	Positive	No	No	No	No	No	No	No	No		No	No	No	No	No	No	No	No	No	No	1	No	0	No	0	No	0	No	No;No;No;No;No;No;No;No;No	Asymptomatic	Personal vehicle	Private	Never	No	Never	No	Vegetarian	V
1327	0.065	0	Negative	Male	Faculty	45	Scientist	S	B+	B	Positive	No	No	No	No	No	No	No	No		No	No	No	No	No	No	No	No	No	No	0	No	0	No	0	No	0	No	No;No;No;No;No;No;No;No;No	Asymptomatic	Personal vehicle	Private	Never	No	Never	No	Vegetarian	V
1328	0.063	0	Negative	Male	Staff	42	Technical Officer	S	A+	A	Positive	No	No	No	No	No	No	No	No		No	No	No	No	No	No	No	No		SU	0	No	0	No	0	No	0	No	No;No;No;No;SU;No;No;No;No	Asymptomatic	Personal vehicle	Private	Never	No	Never	No	Occasionally non veg	NV
1329	0.063	0	Negative	Female	Staff	35	House Wife	S	O+	O	Positive	No	No	No	No	No	No	No	No		No	No	No	No	No	No	No	No	No	No	0	No	0	No	0	No	0	No	No;No;No;No;No;No;No;No;No	Asymptomatic	Personal vehicle	Private	Never	No	Never	No	Occasionally non veg	NV
1330	0.067	0	Negative	Female	Staff	55	House wife	S	O+	O	Positive	Yes	Yes	No	No	No	No	No	No		No	No	No	No	No	No	No	No	No	No	1	No	0	No	0	No	0	No	No;No;No;No;No;No;No;No;No	Asymptomatic	Personal vehicle	Private	Never	No	Never	No	Vegetarian	V
1331	0.062	0	Negative	Male	Faculty	49	R&D	S	A+	A	Positive	No	No	No	No	No	No	No	No		No	No	Yes	Yes	No	No	No	No	No	No	0	No	0	No	0	No	1	No	No;Yes;No;No;No;No;No;No;No	Symptomatic	Personal vehicle	Private	Never	No	Never	No	Vegetarian	V
1332	0.063	0	Negative	Male	Staff	40	CSIR-CEERI	S		SU	SU	No	No	Yes	Yes	No	No	No	No		No	No	No	No	No	No	No	No	No	No	1	No	1	No	1	No	0	No	No;No;No;No;No;No;No;No;No	Asymptomatic	Personal vehicle	Private	Never	No	Never	No	Vegetarian	V
1333	0.061	0	Negative	Male	Others	23	Doctor	S	AB+	AB	Positive	No	No	No	No	No	No	Yes	Yes	Negative	No	No	No	No	No	No	No	No	No	No	0	No	0	No	0	No	0	No	No;No;No;No;No;No;No;No;No	Asymptomatic	Personal vehicle	Private	Never	No	Never	No	Vegetarian	V
1334	0.337	0	Negative	Female	Faculty	37	Assistant Professor	S	O+	O	Positive	No	No	No	No	No	No	No	No		No	No	No	No	No	No	No	No	No	No	1	No	1	No	1	No	0	No	No;No;No;No;No;No;No;No;No	Asymptomatic	Personal vehicle	Private	Never	No	Never	No	Non vegetarian	NV
1335	0.061	0	Negative	Male	Staff	32	T O	S	B+	B	Positive	No	No	No	No	No	No	No	No		No	No	No	No	No	No	No	No		SU	0	No	0	No	0	No	0	No	No;No;No;No;SU;No;No;No;No	Asymptomatic	Personal vehicle	Private	Never	No	Never	No	Vegetarian	V
1336	0.063	0	Negative	Male	Contractual Staff	54	Security Staff	OS		SU	SU	No	No	Yes	Yes	No	No	No	No		No	No	No	No	No	No	No	No	No	No	0	No	0	No	0	No	0	No	No;No;No;No;No;No;No;No;No	Asymptomatic	Personal vehicle	Private	Never	No	Never	No	Non vegetarian	NV
1337	0.064	0	Negative	Male	Contractual Staff	40	Securtiy staff	OS	O+	O	Positive	No	No	No	No	No	No	No	No		No	No	No	No	No	No	No	No	No	No	0	No	0	No	0	No	0	No	No;No;No;No;No;No;No;No;No	Asymptomatic	Personal vehicle	Private	Never	No	Never	No	Vegetarian	V
1338	0.062	0	Negative	Male	Contractual Staff	50	Security Staff	OS	B+	B	Positive	No	No	No	No	Yes	Yes	No	No		No	No	No	No	No	No	No	No	No	No	0	No	0	No	0	No	0	No	No;No;No;No;No;No;No;No;No	Asymptomatic	Personal vehicle	Private	Never	No	Never	No	Vegetarian	V
1339	0.062	0	Negative	Female	Others	42	House wife	S	B+	B	Positive	No	No	No	No	No	No	No	No		No	No	No	No	No	No	No	No	No	No	0	No	0	No	0	No	0	No	No;No;No;No;No;No;No;No;No	Asymptomatic	Personal vehicle	Private	Never	No	Never	No	Vegetarian	V
1340	0.062	0	Negative	Male	Student	18	Student	S	O+	O	Positive	No	No	No	No	No	No	No	No		No	No	No	No	No	No	No	No	No	No	0	No	0	No	0	No	0	No	No;No;No;No;No;No;No;No;No	Asymptomatic	Personal vehicle	Private	Never	No	Never	No	Occasionally non veg	NV
1341	0.064	0	Negative	Male	Staff	57	Employee	S		SU	SU	No	No	No	No	No	No	No	No		No	No	Yes	Yes	No	No		SU		SU	1	No	0	No	0	No	0	No	No;Yes;No;SU;SU;No;No;No;No	Symptomatic	Personal vehicle	Private	Regular	Yes	Occasionally	Occ	Occasionally non veg	NV
1342	0.064	0	Negative	Male	Staff	55	Service	S	O+	O	Positive	No	No	No	No	No	No	No	No		No	No	No	No	No	No	No	No	No	No	0	No	0	No	0	No	0	No	No;No;No;No;No;No;No;No;No	Asymptomatic	Personal vehicle	Private	Never	No	Occasionally	Occ	Vegetarian	V
1343	0.066	0	Negative	Male	Staff	59	Service	S	B+	B	Positive	No	No	No	No	No	No	No	No		No	No	No	No	No	No	No	No	No	No	1	No	0	No	0	No	0	No	No;No;No;No;No;No;No;No;No	Asymptomatic	Personal vehicle	Private	Never	No	Never	No	Vegetarian	V
1344	0.064	0	Negative	Male	Staff	75	ex employee	S	B+	B	Positive	No	No	No	No	No	No	No	No		No	No	No	No	No	No	No	No	No	No	0	No	0	No	0	No	0	No	No;No;No;No;No;No;No;No;No	Asymptomatic	Personal vehicle	Private	Never	No	Never	No	Vegetarian	V
1345	0.061	0	Negative	Male	Contractual Staff	26	Contract Worker	OS		SU	SU	No	No	No	No	No	No	No	No		No	No	No	No	No	No	No	No	No	No	0	No	0	No	0	No	0	No	No;No;No;No;No;No;No;No;No	Asymptomatic	Personal vehicle	Private	Never	No	Never	No	Vegetarian	V
1346	0.064	0	Negative	Male	Staff	44	Research	S		SU	SU	No	No	No	No	No	No	No	No		No	No	No	No	No	No	No	No	No	No	0	No	0	No	0	No	0	No	No;No;No;No;No;No;No;No;No	Asymptomatic	Personal vehicle	Private	Never	No	Never	No	Non vegetarian	NV
1347	0.069	0	Negative	Female	Others	73	house wife	S		SU	SU	No	No	Yes	Yes	No	No	No	No		No	No	No	No	No	No		SU		SU	1	No	0	No	0	No	0	No	No;No;No;SU;SU;No;No;No;No	Asymptomatic	Personal vehicle	Private	Never	No	Never	No	Vegetarian	V
1348	0.064	0	Negative	Male	Staff	25	Political Analyst	S	A+	A	Positive	No	No	No	No	No	No	No	No		No	No	No	No	No	No	No	No	No	No	4	Yes	0	No	0	No	0	No	No;No;No;No;No;Yes;No;No;No	Symptomatic	Personal vehicle	Private	Sporadic	Yes	Occasionally	Occ	Vegetarian	V
1349	0.067	0	Negative	Female	Student	30	phd scholar	S	B+	B	Positive	No	No	No	No	No	No	No	No		No	No	No	No	No	No	No	No	No	No	2	No	1	No	2	No	0	No	No;No;No;No;No;No;No;No;No	Asymptomatic	Personal vehicle	Private	Never	No	Never	No	Vegetarian	V
1350	0.068	0	Negative	Male	Staff	34	Govt employee	S	O+	O	Positive	No	No	No	No	No	No	No	No		No	No	No	No	No	No	No	No	No	No	0	No	0	No	0	No	0	No	No;No;No;No;No;No;No;No;No	Asymptomatic	Personal vehicle	Private	Never	No	Never	No	Non vegetarian	NV
1351	0.064	0	Negative	Female	Others	30	Self employed	S	A+	A	Positive	No	No	No	No	No	No	No	No		No	No	No	No	No	No	No	No	No	No	0	No	1	No	0	No	0	No	No;No;No;No;No;No;No;No;No	Asymptomatic	on feet	Private	Never	No	Never	No	Vegetarian	V
1352	0.075	0	Negative	Male	Staff	46	Govt. Job	S		SU	SU	No	No	No	No	No	No	No	No		No	No	No	No	No	No	No	No	No	No	2	No	1	No	1	No	0	No	No;No;No;No;No;No;No;No;No	Asymptomatic	Personal vehicle	Private	Regular	Yes	Never	No	Non vegetarian	NV
1353	0.061	0	Negative	Male	Staff	51	Staff	S	B+	B	Positive	No	No	Yes	Yes	No	No	No	No		No	No	No	No	No	No		SU		SU	1	No	0	No	0	No	0	No	No;No;No;SU;SU;No;No;No;No	Asymptomatic	Personal vehicle	Private	Regular	Yes	Never	No	Vegetarian	V
1354	0.059	0	Negative	Male	Others	22	STUDENT	S	B+	B	Positive	No	No	No	No	No	No	No	No		Yes	Yes	No	No	Yes	Yes	No	No	No	No	1	No	0	No	2	No	0	No	Yes;No;Yes;No;No;No;No;No;No	Symptomatic	Personal vehicle	Private	Never	No	Never	No	Non vegetarian	NV
1355	0.063	0	Negative	Male	Staff	34	Staff	S	B+	B	Positive	No	No	No	No	No	No	No	No		No	No	No	No	No	No	No	No	No	No	0	No	0	No	0	No	0	No	No;No;No;No;No;No;No;No;No	Asymptomatic	Personal vehicle	Private	Never	No	Never	No	Vegetarian	V
1356	143.3	1	Positive	Male	Student	35	Project staff	S	A+	A	Positive	No	No	No	No	No	No	No	No		No	No	No	No	No	No	No	No	No	No	0	No	0	No	0	No	0	No	No;No;No;No;No;No;No;No;No	Asymptomatic	Personal vehicle	Private	Sporadic	Yes	Occasionally	Occ	Occasionally non veg	NV
1357	0.097	0	Negative	Male	Others	26	Job	S	A+	A	Positive	No	No	No	No	No	No	No	No		No	No	No	No	No	No	No	No	No	No	2	No	2	No	0	No	1	No	No;No;No;No;No;No;No;No;No	Asymptomatic	Personal vehicle	Private	Never	No	Never	No	Vegetarian	V
1358	0.065	0	Negative	Male	Staff	56	service	S	O+	O	Positive	No	No	No	No	No	No	No	No		No	No	No	No	No	No	No	No	No	No	0	No	0	No	0	No	0	No	No;No;No;No;No;No;No;No;No	Asymptomatic	Personal vehicle	Private	Regular	Yes	Never	No	Vegetarian	V
1359	0.061	0	Negative	Male	Contractual Staff	47	staff	S		SU	SU	No	No	No	No	No	No	No	No		No	No	No	No	No	No	No	No	No	No	0	No	0	No	0	No	0	No	No;No;No;No;No;No;No;No;No	Asymptomatic	Public transport	Public	Regular	Yes	Never	No	Vegetarian	V
1360	0.065	0	Negative	Male	Student	26	STUDENT	S	O+	O	Positive	No	No	No	No	No	No	No	No		No	No	No	No	No	No	No	No	No	No	0	No	0	No	0	No	0	No	No;No;No;No;No;No;No;No;No	Asymptomatic	Did not go anywhere since march-20	Private	Sporadic	Yes	Occasionally	Occ	Vegetarian	V
1361	0.065	0	Negative	Male	Contractual Staff	37	Staff	S		SU	SU	No	No	No	No	No	No	No	No		No	No	No	No	No	No		SU		SU	0	No	0	No	0	No	0	No	No;No;No;SU;SU;No;No;No;No	Asymptomatic	Public transport	Public	Never	No	Never	No	Vegetarian	V
1362	0.091	0	Negative	Male	Contractual Staff	38	Staff	S	O+	O	Positive	No	No	No	No	No	No	No	No		No	No	No	No	No	No		SU		SU	0	No	0	No	0	No	0	No	No;No;No;SU;SU;No;No;No;No	Asymptomatic	Personal vehicle	Private	Sporadic	Yes	Never	No	Vegetarian	V
1363	0.063	0	Negative	Female	Contractual Staff	24	Junior Research Fellow	S	A+	A	Positive	No	No	No	No	No	No	No	No		No	No	No	No	No	No	No	No	No	No	0	No	0	No	0	No	0	No	No;No;No;No;No;No;No;No;No	Asymptomatic	Personal vehicle	Private	Never	No	Never	No	Vegetarian	V
1364	0.163	0	Negative	Male	Staff	52	staff	S		SU	SU	No	No	No	No	No	No	No	No		No	No	No	No	No	No		SU		SU	0	No	0	No	0	No	0	No	No;No;No;SU;SU;No;No;No;No	Asymptomatic	Personal vehicle	Private	Never	No	Occasionally	Occ	Vegetarian	V
1365	0.069	0	Negative	Male	Staff	54	Service	S	AB+	AB	Positive	No	No	No	No	No	No	No	No		No	No	No	No	No	No	No	No	No	No	1	No	0	No	0	No	0	No	No;No;No;No;No;No;No;No;No	Asymptomatic	Personal vehicle	Private	Never	No	Never	No	Vegetarian	V
1366	0.065	0	Negative	Female	Others	49	staff	S		SU	SU	Yes	Yes	Yes	Yes	No	No	No	No		No	No	No	No	No	No		SU		SU	1	No	0	No	0	No	0	No	No;No;No;SU;SU;No;No;No;No	Asymptomatic	Personal vehicle	Private	Never	No	Never	No	Vegetarian	V
1367	0.062	0	Negative	Male	Staff	39	Sr. Technical Officer (1) in CSIR-CEERI	S	O+	O	Positive	No	No	Yes	Yes	No	No	No	No		No	No	No	No	Yes	Yes	No	No	No	No	1	No	1	No	1	No	0	No	No;No;Yes;No;No;No;No;No;No	Symptomatic	Personal vehicle	Private	Never	No	Never	No	Occasionally non veg	NV
1368	0.064	0	Negative	Male	Contractual Staff	31	staff	S		SU	SU	No	No	No	No	No	No	No	No		No	No	No	No	No	No		SU		SU	0	No	0	No	0	No	0	No	No;No;No;SU;SU;No;No;No;No	Asymptomatic	Personal vehicle	Private	Never	No	Occasionally	Occ	Vegetarian	V
1369	0.06	0	Negative	Male	Contractual Staff	26	Contractual staff	OS	O+	O	Positive	No	No	No	No	No	No	No	No		No	No	No	No	No	No	No	No	No	No	0	No	0	No	0	No	0	No	No;No;No;No;No;No;No;No;No	Asymptomatic	Personal vehicle	Private	Never	No	Never	No	Vegetarian	V
1370	0.063	0	Negative	Female	Contractual Staff	27	Research fellow	S	B+	B	Positive	No	No	Yes	Yes	No	No	No	No		No	No	No	No	No	No	No	No	No	No	3	Yes	3	Yes	1	No	1	No	No;No;No;No;No;Yes;Yes;No;No	Symptomatic	Personal vehicle	Private	Never	No	Never	No	Vegetarian	V
1371	0.059	0	Negative	Male	Staff	33	Gov.gob	S	O+	O	Positive	No	No	No	No	No	No	No	No		No	No	No	No	No	No	No	No	No	No	1	No	0	No	0	No	0	No	No;No;No;No;No;No;No;No;No	Asymptomatic	Personal vehicle	Private	Never	No	Never	No	Vegetarian	V
1372	0.062	0	Negative	Male	Contractual Staff	30	staff	S	AB	AB	Negative	No	No	No	No	No	No	No	No		No	No	No	No	No	No	No	No	No	No	0	No	0	No	0	No	0	No	No;No;No;No;No;No;No;No;No	Asymptomatic	Personal vehicle	Private	Never	No	Occasionally	Occ	Vegetarian	V
1373	0.06	0	Negative	Male	Staff	45	Scientist	S	B+	B	Positive	No	No	No	No	No	No	No	No		No	No	No	No	No	No	No	No	No	No	0	No	0	No	0	No	0	No	No;No;No;No;No;No;No;No;No	Asymptomatic	Personal vehicle	Private	Never	No	Never	No	Occasionally non veg	NV
1374	0.06	0	Negative	Male	Staff	32	Scientist, CEERI, Pilani	S	B+	B	Positive	No	No	No	No	No	No	No	No		No	No	No	No	No	No	No	No	No	No	2	No	0	No	0	No	0	No	No;No;No;No;No;No;No;No;No	Asymptomatic	Personal vehicle	Private	Never	No	Never	No	Vegetarian	V
1375	0.062	0	Negative	Female	Others	29	staff	S		SU	SU	No	No	No	No	No	No	No	No		No	No	No	No	No	No		SU		SU	0	No	0	No	0	No	0	No	No;No;No;SU;SU;No;No;No;No	Asymptomatic	Personal vehicle	Private	Never	No	Never	No	Vegetarian	V
1376	0.072	0	Negative	Male	Contractual Staff	23	staff	S		SU	SU	No	No	No	No	No	No	No	No		No	No	No	No	No	No		SU		SU	0	No	0	No	0	No	0	No	No;No;No;SU;SU;No;No;No;No	Asymptomatic	Personal vehicle	Private	Never	No	Never	No	Occasionally non veg	NV
1377	0.062	0	Negative	Male	Staff	54	Service	S		SU	SU	No	No	No	No	No	No	No	No		No	No	No	No	No	No	No	No	No	No	0	No	0	No	0	No	0	No	No;No;No;No;No;No;No;No;No	Asymptomatic	Personal vehicle	Private	Never	No	Never	No	Vegetarian	V
1378	0.061	0	Negative	Male	Contractual Staff	25	Contractual staff	OS		SU	SU	No	No	No	No	No	No	No	No		No	No	No	No	No	No	No	No	No	No	0	No	0	No	0	No	0	No	No;No;No;No;No;No;No;No;No	Asymptomatic	Personal vehicle	Private	Never	No	Never	No	Non vegetarian	NV
1379	0.065	0	Negative	Male	Contractual Staff	39	mems lab	S	O+	O	Positive	No	No	No	No	No	No	No	No		No	No	No	No	No	No	No	No	No	No	0	No	0	No	0	No	0	No	No;No;No;No;No;No;No;No;No	Asymptomatic	Personal vehicle	Private	Never	No	Never	No	Vegetarian	V
1380	0.058	0	Negative	Male	Contractual Staff	44	staff	S	AB+	AB	Positive	No	No	No	No	No	No	No	No		No	No	No	No	No	No	No	No	No	No	0	No	0	No	0	No	0	No	No;No;No;No;No;No;No;No;No	Asymptomatic	Personal vehicle	Private	Never	No	Never	No	Vegetarian	V
1381	0.062	0	Negative	Male	Contractual Staff	36	staff	S		SU	SU	No	No	Yes	Yes	No	No	No	No		No	No	No	No	No	No		SU		SU	0	No	0	No	0	No	0	No	No;No;No;SU;SU;No;No;No;No	Asymptomatic	Personal vehicle	Private	Never	No	Never	No	Occasionally non veg	NV
1382	0.062	0	Negative	Male	Contractual Staff	21	staff	S		SU	SU	No	No	No	No	No	No	No	No		No	No	No	No	No	No		SU		SU	0	No	0	No	0	No	0	No	No;No;No;SU;SU;No;No;No;No	Asymptomatic	Personal vehicle	Private	Never	No	Never	No	Occasionally non veg	NV
1383	0.07	0	Negative	Male	Contractual Staff	28	staff	S		SU	SU	No	No	No	No	No	No	No	No		No	No	No	No	No	No		SU		SU	0	No	0	No	0	No	0	No	No;No;No;SU;SU;No;No;No;No	Asymptomatic	Personal vehicle	Private	Never	No	Occasionally	Occ	Occasionally non veg	NV
1384	0.065	0	Negative	Male	Staff	38	Govt job	S	AB+	AB	Positive	No	No	No	No	No	No	No	No		No	No	No	No	No	No	No	No	No	No	0	No	0	No	0	No	0	No	No;No;No;No;No;No;No;No;No	Asymptomatic	Personal vehicle	Private	Never	No	Occasionally	Occ	Vegetarian	V
1385	0.064	0	Negative	Male	Staff	59	staff	S	O+	O	Positive	No	No	No	No	No	No	No	No		No	No	No	No	No	No	No	No	No	No	0	No	0	No	0	No	0	No	No;No;No;No;No;No;No;No;No	Asymptomatic	Personal vehicle	Private	Never	No	Never	No	Vegetarian	V
1386	0.323	0	Negative	Male	Others	77	staff	S		SU	SU	No	No	No	No	No	No	No	No		No	No	No	No	No	No		SU		SU	1	No	0	No	0	No	0	No	No;No;No;SU;SU;No;No;No;No	Asymptomatic	Personal vehicle	Private	Sporadic	Yes	Occasionally	Occ	Occasionally non veg	NV
1387	0.061	0	Negative	Male	Staff	39	staff	S		SU	SU	No	No	No	No	No	No	No	No		No	No	No	No	No	No		SU		SU	0	No	0	No	0	No	0	No	No;No;No;SU;SU;No;No;No;No	Asymptomatic	Personal vehicle	Private	Never	No	Often	Yes	Vegetarian	V
1388	0.058	0	Negative	Female	Others	48	Service	S	B+	B	Positive	No	No	Yes	Yes	No	No	No	No		No	No	No	No	No	No	No	No	No	No	3	Yes	3	Yes	0	No	0	No	No;No;No;No;No;Yes;Yes;No;No	Symptomatic	Personal vehicle	Private	Never	No	Never	No	Vegetarian	V
1389	0.061	0	Negative	Female	Others	41	staff	S	B+	B	Positive	No	No	No	No	No	No	No	No		No	No	No	No	No	No	No	No	No	No	0	No	0	No	0	No	0	No	No;No;No;No;No;No;No;No;No	Asymptomatic	Personal vehicle	Private	Never	No	Never	No	Occasionally non veg	NV
1390	0.064	0	Negative	Female	Student	19	student	S	AB+	AB	Positive	No	No	No	No	No	No	No	No		No	No	No	No	No	No		SU		SU	0	No	0	No	0	No	0	No	No;No;No;SU;SU;No;No;No;No	Asymptomatic	Personal vehicle	Private	Never	No	Never	No	Vegetarian	V
1391	0.062	0	Negative	Male	Staff	37	government service	S		SU	SU	No	No	No	No	No	No	No	No		No	No	No	No	No	No	No	No	No	No	0	No	0	No	0	No	0	No	No;No;No;No;No;No;No;No;No	Asymptomatic	Personal vehicle	Private	Never	No	Never	No	Vegetarian	V
1392	0.064	0	Negative	Male	Others	50	staff	S	B+	B	Positive	No	No	No	No	No	No	No	No		No	No	No	No	No	No	No	No	No	No	0	No	0	No	0	No	0	No	No;No;No;No;No;No;No;No;No	Asymptomatic	Personal vehicle	Private	Never	No	Never	No	Vegetarian	V
1393	0.063	0	Negative	Female	Staff	43	staff	S		SU	SU	No	No	No	No	No	No	No	No		No	No	No	No	No	No		SU		SU	0	No	0	No	0	No	0	No	No;No;No;SU;SU;No;No;No;No	Asymptomatic	Personal vehicle	Private	Never	No	Never	No	Vegetarian	V
1394	0.059	0	Negative	Female	Others	51	House wife	S		SU	SU	No	No	Yes	Yes	No	No	No	No		No	No	No	No	No	No	No	No	No	No	0	No	0	No	0	No	0	No	No;No;No;No;No;No;No;No;No	Asymptomatic	Personal vehicle	Private	Never	No	Never	No	Vegetarian	V
1395	0.062	0	Negative	Male	Contractual Staff	41	Retired	S	B+	B	Positive	No	No	No	No	No	No	No	No		No	No	No	No	No	No	No	No	No	No	1	No	0	No	0	No	0	No	No;No;No;No;No;No;No;No;No	Asymptomatic	Personal vehicle	Private	Never	No	Never	No	Vegetarian	V
1396	0.063	0	Negative	Male	Contractual Staff	32	EME	OS		SU	SU	No	No	No	No	No	No	No	No		No	No	No	No	No	No	No	No	No	No	0	No	0	No	0	No	0	No	No;No;No;No;No;No;No;No;No	Asymptomatic	Personal vehicle	Private	Never	No	Never	No	Vegetarian	V
1397	0.065	0	Negative	Male	Contractual Staff	41	Retired	S	O+	O	Positive	No	No	No	No	No	No	No	No		No	No	No	No	No	No	No	No	No	No	1	No	0	No	0	No	0	No	No;No;No;No;No;No;No;No;No	Asymptomatic	Personal vehicle	Private	Never	No	Never	No	Vegetarian	V
1398	0.06	0	Negative	Male	Staff	52	Assistant Section Officer, CSIR-CEERI, Pilani	S	B+	B	Positive	No	No	No	No	No	No	No	No		No	No	No	No	No	No	No	No	No	No	0	No	0	No	0	No	0	No	No;No;No;No;No;No;No;No;No	Asymptomatic	Personal vehicle	Private	Never	No	Never	No	Vegetarian	V
1399	0.062	0	Negative	Female	Staff	23	Student	S	O+	O	Positive	No	No	No	No	No	No	No	No		No	No	No	No	No	No	No	No	No	No	0	No	0	No	0	No	0	No	No;No;No;No;No;No;No;No;No	Asymptomatic	Personal vehicle	Private	Never	No	Never	No	Vegetarian	V
1400	0.058	0	Negative	Male	Contractual Staff	48	Security Guard	OS	B+	B	Positive	No	No	No	No	No	No	No	No		No	No	No	No	No	No	No	No	No	No	1	No	1	No	0	No	0	No	No;No;No;No;No;No;No;No;No	Asymptomatic	Personal vehicle	Private	Never	No	Never	No	Vegetarian	V
1401	0.094	0	Negative	Male	Student	29	Student	S	B+	B	Positive	No	No	No	No	No	No	No	No		No	No	No	No	Yes	Yes	No	No	No	No	3	Yes	2	No	2	No	2	No	No;No;Yes;No;No;Yes;No;No;No	Symptomatic	Personal vehicle	Private	Never	No	Never	No	Vegetarian	V
1402	0.062	0	Negative	Female	Others	63	Housewife	S	A+	A	Positive	No	No	Yes	Yes	No	No	No	No		No	No	No	No	No	No	No	No	No	No	0	No	0	No	0	No	0	No	No;No;No;No;No;No;No;No;No	Asymptomatic	Personal vehicle	Private	Never	No	Never	No	Non vegetarian	NV
1403	0.065	0	Negative	Male	Staff	55	Govt. worker	S	B+	B	Positive	No	No	No	No	No	No	No	No		No	No	No	No	No	No	May be	Yes	May be	Yes	0	No	0	No	0	No	0	No	No;No;No;Yes;Yes;No;No;No;No	Symptomatic	Personal vehicle	Private	Never	No	Never	No	Vegetarian	V
1404	0.061	0	Negative	Male	Staff	54	MTS	S	A+	A	Positive	No	No	No	No	No	No	No	No		No	No	No	No	No	No	No	No	No	No	0	No	0	No	0	No	0	No	No;No;No;No;No;No;No;No;No	Asymptomatic	Personal vehicle	Private	Never	No	Never	No	Occasionally non veg	NV
1405	0.063	0	Negative	Male	Staff	54	LAb Assistant	S	O+	O	Positive	No	No	No	No	No	No	No	No		No	No	No	No	No	No	No	No	No	No	0	No	0	No	0	No	0	No	No;No;No;No;No;No;No;No;No	Asymptomatic	Personal vehicle	Private	Never	No	Never	No	Occasionally non veg	NV
1406	0.06	0	Negative	Male	Contractual Staff	30	SERVICE	S	O+	O	Positive	No	No	No	No	No	No	No	No		No	No	No	No	No	No	No	No	No	No	3	Yes	1	No	2	No	1	No	No;No;No;No;No;Yes;No;No;No	Symptomatic	Personal vehicle	Private	Regular	Yes	Occasionally	Occ	Vegetarian	V
1407	1.36	1	Positive	Male	Staff	60	service	S	A+	A	Positive	No	No	No	No	No	No	No	No		No	No	No	No	No	No	No	No	No	No	0	No	0	No	0	No	0	No	No;No;No;No;No;No;No;No;No	Asymptomatic	Personal vehicle	Private	Regular	Yes	Never	No	Vegetarian	V
1408	0.062	0	Negative	Male	Contractual Staff	34	Contract labour	OS		SU	SU	No	No	No	No	No	No	No	No		No	No	No	No	No	No	No	No	No	No	0	No	0	No	0	No	0	No	No;No;No;No;No;No;No;No;No	Asymptomatic	cycle	Private	Never	No	Never	No	Occasionally non veg	NV
1409	0.071	0	Negative	Male	Contractual Staff	48	contract labour	OS		SU	SU	No	No	No	No	No	No	No	No		No	No	No	No	No	No	No	No	No	No	0	No	0	No	0	No	0	No	No;No;No;No;No;No;No;No;No	Asymptomatic	cycle	Private	Regular	Yes	Occasionally	Occ	Occasionally non veg	NV
1410	0.063	0	Negative	Male	Staff	58	Service	S	AB+	AB	Positive	No	No	Yes	Yes	No	No	No	No		No	No	No	No	No	No	No	No	No	No	0	No	0	No	0	No	0	No	No;No;No;No;No;No;No;No;No	Asymptomatic	Personal vehicle	Private	Regular	Yes	Occasionally	Occ	Non vegetarian	NV
1411	0.06	0	Negative	Male	Contractual Staff	34	CONTRACT LABOUR	OS		SU	SU	No	No	No	No	No	No	No	No		No	No	No	No	No	No	No	No	No	No	0	No	0	No	0	No	0	No	No;No;No;No;No;No;No;No;No	Asymptomatic	CYCLE	Private	Never	No	Never	No	Vegetarian	V
1412	0.067	0	Negative	Male	Contractual Staff	43	CONTRACT LABOUR	OS		SU	SU	No	No	No	No	No	No	No	No		No	No	No	No	No	No	No	No	No	No	0	No	0	No	0	No	0	No	No;No;No;No;No;No;No;No;No	Asymptomatic	CYCLE	Private	Never	No	Never	No	Vegetarian	V
1413	0.063	0	Negative	Male	Others	25	student	S	O-	O	Negative	No	No	No	No	No	No	No	No		No	No	No	No	No	No	No	No	No	No	0	No	0	No	1	No	0	No	No;No;No;No;No;No;No;No;No	Asymptomatic	Personal vehicle	Private	Never	No	Never	No	Vegetarian	V
1414	0.088	0	Negative	Male	Contractual Staff	36	CONTRACT WORKER	OS		SU	SU	No	No	No	No	No	No	No	No		No	No	No	No	No	No	May be	Yes	May be	Yes	0	No	0	No	0	No	0	No	No;No;No;Yes;Yes;No;No;No;No	Symptomatic	CYCLE	Private	Never	No	Occasionally	Occ	Vegetarian	V
1415	0.062	0	Negative	Male	Staff	29	SERVICE	S	AB+	AB	Positive	No	No	No	No	No	No	No	No		No	No	No	No	No	No	No	No	No	No	0	No	0	No	0	No	0	No	No;No;No;No;No;No;No;No;No	Asymptomatic	Personal vehicle	Private	Never	No	Never	No	Non vegetarian	NV
1416	0.069	0	Negative	Male	Contractual Staff	35	CONTRACT WORKER	OS		SU	SU	No	No	No	No	No	No	No	No		No	No	No	No	No	No	No	No	No	No	0	No	0	No	0	No	0	No	No;No;No;No;No;No;No;No;No	Asymptomatic	CYCLE	Private	Regular	Yes	Never	No	Occasionally non veg	NV
1417	0.161	0	Negative	Male	Contractual Staff	34	CONTRACT WORKER	OS		SU	SU	No	No	No	No	No	No	No	No		No	No	No	No	No	No	No	No	No	No	0	No	0	No	0	No	0	No	No;No;No;No;No;No;No;No;No	Asymptomatic	CYCLE	Private	Never	No	Never	No	Vegetarian	V
1418	0.062	0	Negative	Female	Others	62	Senior Citizen	S	AB+	AB	Positive	No	No	No	No	No	No	No	No		No	No	No	No	No	No	No	No	No	No	1	No	3	Yes	0	No	0	No	No;No;No;No;No;No;Yes;No;No	Symptomatic	Home stay	Private	Never	No	Never	No	Vegetarian	V
1419	0.085	0	Negative	Male	Contractual Staff	34	CONTRACT WORKER	OS		SU	SU	No	No	No	No	No	No	No	No		No	No	No	No	No	No	No	No	No	No	0	No	0	No	0	No	0	No	No;No;No;No;No;No;No;No;No	Asymptomatic	CYCLE	Private	Regular	Yes	Never	No	Occasionally non veg	NV
1420	0.073	0	Negative	Male	Contractual Staff	42	CONTRACT WORKER	OS		SU	SU	No	No	No	No	No	No	No	No		No	No	No	No	No	No	No	No	No	No	0	No	0	No	0	No	0	No	No;No;No;No;No;No;No;No;No	Asymptomatic	CYCLE	Private	Never	No	Never	No	Vegetarian	V
1421	0.062	0	Negative	Male	Contractual Staff	49	CONTRACT WORKER	OS		SU	SU	No	No	No	No	No	No	No	No		No	No	No	No	No	No	No	No	No	No	0	No	0	No	0	No	0	No	No;No;No;No;No;No;No;No;No	Asymptomatic	CYCLE	Private	Regular	Yes	Never	No	Vegetarian	V
1422	0.06	0	Negative	Male	Contractual Staff	47	CONTRACT WORKER	OS		SU	SU	No	No	No	No	No	No	No	No		No	No	No	No	No	No	No	No	No	No	0	No	0	No	0	No	0	No	No;No;No;No;No;No;No;No;No	Asymptomatic	CYCLE	Private	Never	No	Often	Yes	Occasionally non veg	NV
1423	0.062	0	Negative	Male	Contractual Staff	32	CONTRACT WORKER	OS		SU	SU	No	No	No	No	No	No	No	No		No	No	No	No	No	No	No	No	No	No	0	No	0	No	0	No	0	No	No;No;No;No;No;No;No;No;No	Asymptomatic	CYCLE	Private	Never	No	Never	No	Vegetarian	V
1424	0.064	0	Negative	Male	Contractual Staff	36	CONTRACT STAFF	OS		SU	SU	No	No	No	No	No	No	No	No		No	No	No	No	No	No	No	No	No	No	0	No	0	No	0	No	0	No	No;No;No;No;No;No;No;No;No	Asymptomatic	CYCLE	Private	Never	No	Never	No	Vegetarian	V
1425	0.065	0	Negative	Male	Contractual Staff	46	CONTRACT WORKER	OS		SU	SU	No	No	No	No	No	No	No	No		No	No	No	No	No	No	No	No	No	No	0	No	0	No	0	No	0	No	No;No;No;No;No;No;No;No;No	Asymptomatic	CYCLE	Private	Regular	Yes	Often	Yes	Occasionally non veg	NV
1426	0.215	0	Negative	Male	Contractual Staff	37	CONTRACT WORKER	OS		SU	SU	No	No	No	No	No	No	No	No		No	No	No	No	No	No	No	No	No	No	0	No	0	No	0	No	0	No	No;No;No;No;No;No;No;No;No	Asymptomatic	CYCLE	Private	Never	No	Never	No	Vegetarian	V
1427	0.062	0	Negative	Male	Contractual Staff	46	CONTRACT WORKER	OS		SU	SU	No	No	No	No	No	No	No	No		No	No	No	No	No	No	No	No	No	No	0	No	0	No	0	No	0	No	No;No;No;No;No;No;No;No;No	Asymptomatic	CYCLE	Private	Regular	Yes	Never	No	Vegetarian	V
1428	0.072	0	Negative	Male	Staff	58	SERVICE	S	AB+	AB	Positive	No	No	No	No	No	No	No	No		No	No	No	No	No	No	No	No	No	No	0	No	0	No	0	No	0	No	No;No;No;No;No;No;No;No;No	Asymptomatic	CYCLE	Private	Never	No	Never	No	Vegetarian	V
1429	0.061	0	Negative	Female	Others	54	SERVICE	S	B+	B	Positive	Yes	Yes	No	No	No	No	No	No		No	No	No	No	No	No	No	No	No	No	0	No	0	No	0	No	0	No	No;No;No;No;No;No;No;No;No	Asymptomatic	CYCLE	Private	Never	No	Never	No	Vegetarian	V
1430	0.069	0	Negative	Male	Staff	35	Govt. Service	S	A+	A	Positive	No	No	No	No	No	No	Yes	Yes	Negative	No	No	No	No	No	No	No	No	No	No	2	No	1	No	1	No	1	No	No;No;No;No;No;No;No;No;No	Asymptomatic	Personal vehicle	Private	Never	No	Never	No	Vegetarian	V
1431	0.065	0	Negative	Male	Others	30	STUDY	S		SU	SU	No	No	No	No	No	No	No	No		No	No	No	No	No	No	No	No	No	No	0	No	0	No	0	No	0	No	No;No;No;No;No;No;No;No;No	Asymptomatic	Personal vehicle	Private	Never	No	Never	No	Vegetarian	V
1432	0.065	0	Negative	Female	Others	25	STUDENT	S	B-	B	Negative	No	No	No	No	No	No	No	No		No	No	No	No	No	No	No	No	No	No	0	No	0	No	0	No	0	No	No;No;No;No;No;No;No;No;No	Asymptomatic	Personal vehicle	Private	Never	No	Never	No	Vegetarian	V
1433	0.059	0	Negative	Male	Others	23	NONE	S	B+	B	Positive	No	No	No	No	No	No	No	No		No	No	No	No	No	No	No	No	No	No	0	No	0	No	0	No	0	No	No;No;No;No;No;No;No;No;No	Asymptomatic	Public transport	Public	Never	No	Never	No	Vegetarian	V
1434	0.062	0	Negative	Male	Staff	44	Government servants	S	O+	O	Positive	No	No	No	No	No	No	Yes	Yes	Negative	No	No	No	No	No	No	No	No	No	No	1	No	0	No	0	No	0	No	No;No;No;No;No;No;No;No;No	Asymptomatic	On foot	Private	Never	No	Never	No	Vegetarian	V
1435	0.088	0	Negative	Male	Faculty	54	Scientists	S	A+	A	Positive	No	No	No	No	No	No	Yes	Yes	Negative	No	No	No	No	No	No	No	No	No	No	1	No	0	No	0	No	0	No	No;No;No;No;No;No;No;No;No	Asymptomatic	Personal vehicle	Private	Never	No	Never	No	Vegetarian	V
1436	0.062	0	Negative	Male	Others	75	RETD.	S	A+	A	Positive	Yes	Yes	Yes	Yes	No	No	No	No		No	No	No	No	No	No	No	No	No	No	0	No	0	No	0	No	0	No	No;No;No;No;No;No;No;No;No	Asymptomatic	Personal vehicle	Private	Never	No	Never	No	Vegetarian	V
1437	0.064	0	Negative	Male	Others	40	SERVICE	S		SU	SU	No	No	No	No	No	No	No	No		No	No	No	No	No	No	No	No	No	No	0	No	0	No	0	No	0	No	No;No;No;No;No;No;No;No;No	Asymptomatic	Personal vehicle	Private	Never	No	Never	No	Vegetarian	V
1438	0.063	0	Negative	Male	Staff	55	SERVICE	S	O+	O	Positive	No	No	No	No	No	No	No	No		No	No	No	No	No	No	No	No	No	No	0	No	0	No	0	No	0	No	No;No;No;No;No;No;No;No;No	Asymptomatic	Personal vehicle	Private	Never	No	Never	No	Vegetarian	V
1439	0.062	0	Negative	Male	Staff	SU	Ao	S		SU	SU	No	No	No	No	No	No	No	No		No	No	No	No	No	No	No	No	No	No	0	No	0	No	0	No	0	No	No;No;No;No;No;No;No;No;No	Asymptomatic	Personal vehicle	Private	Never	No	Never	No	Vegetarian	V
1440	0.063	0	Negative	Female	Others	30	Staff	S		SU	SU	No	No	No	No	No	No	No	No		No	No	No	No	No	No		SU		SU	0	No	0	No	0	No	0	No	No;No;No;SU;SU;No;No;No;No	Asymptomatic	Personal vehicle	Private	Never	No	Never	No	Occasionally non veg	NV
1441	0.063	0	Negative	Male	Others	48	Assistant Professor	S	B+	B	Positive	No	No	No	No	No	No	No	No		No	No	No	No	No	No	No	No	No	No	0	No	0	No	0	No	0	No	No;No;No;No;No;No;No;No;No	Asymptomatic	Personal vehicle	Private	Never	No	Never	No	Vegetarian	V
1442	0.06	0	Negative	Male	Contractual Staff	35	gaurd	OS		SU	SU	No	No	No	No	No	No	No	No		No	No	No	No	No	No		SU		SU	0	No	0	No	0	No	0	No	No;No;No;SU;SU;No;No;No;No	Asymptomatic	Personal vehicle	Private	Never	No	Never	No	Occasionally non veg	NV
1443	0.068	0	Negative	Male	Contractual Staff	48	gaurd	OS	B+	B	Positive	No	No	No	No	No	No	No	No		No	No	No	No	No	No		SU		SU	0	No	0	No	0	No	0	No	No;No;No;SU;SU;No;No;No;No	Asymptomatic	Personal vehicle	Private	Never	No	Occasionally	Occ	Occasionally non veg	NV
1444	0.06	0	Negative	Male	Contractual Staff	55	gardener	OS		SU	SU	No	No	No	No	No	No	No	No		No	No	No	No	No	No		SU		SU	0	No	0	No	0	No	0	No	No;No;No;SU;SU;No;No;No;No	Asymptomatic	Personal vehicle	Private	Never	No	Never	No	Vegetarian	V
1445	0.061	0	Negative	Male	Staff	60	staff	S	O+	O	Positive	No	No	No	No	No	No	No	No		No	No	No	No	No	No		SU		SU	1	No	0	No	0	No	0	No	No;No;No;SU;SU;No;No;No;No	Asymptomatic	Personal vehicle	Private	Never	No	Never	No	Vegetarian	V
1446	0.072	0	Negative	Female	Others	54	housewife	S		SU	SU	No	No	No	No	No	No	No	No		No	No	No	No	No	No		SU		SU	0	No	0	No	0	No	0	No	No;No;No;SU;SU;No;No;No;No	Asymptomatic	Personal vehicle	Private	Never	No	Never	No	Vegetarian	V
1447	0.06	0	Negative	Male	Staff	57	staff	S		SU	SU	No	No	No	No	Yes	Yes	No	No		No	No	No	No	No	No		SU		SU	0	No	0	No	0	No	0	No	No;No;No;SU;SU;No;No;No;No	Asymptomatic	Personal vehicle	Private	Regular	Yes	Occasionally	Occ	Vegetarian	V
1448	0.064	0	Negative	Female	Others	28	TEACHING	S		SU	SU	No	No	No	No	No	No	No	No		No	No	No	No	No	No	No	No	No	No	0	No	0	No	0	No	0	No	No;No;No;No;No;No;No;No;No	Asymptomatic	Personal vehicle	Private	Never	No	Never	No	Vegetarian	V
1449	0.062	0	Negative	Female	Others	52	housewife	S		SU	SU	No	No	No	No	No	No	No	No		No	No	No	No	No	No		SU		SU	0	No	0	No	0	No	0	No	No;No;No;SU;SU;No;No;No;No	Asymptomatic	Personal vehicle	Private	Never	No	Never	No	Vegetarian	V
1450	0.061	0	Negative	Female	Others	26	SERVICE	S	O+	O	Positive	No	No	No	No	No	No	No	No		No	No	No	No	No	No	No	No	No	No	0	No	0	No	0	No	0	No	No;No;No;No;No;No;No;No;No	Asymptomatic	Personal vehicle	Private	Never	No	Never	No	Vegetarian	V
1451	0.063	0	Negative	Male	Others	77	Retired	S	O+	O	Positive	No	No	No	No	No	No	No	No		No	No	No	No	No	No	Yes	Yes	Yes	Yes	2	No	0	No	0	No	0	No	No;No;No;Yes;Yes;No;No;No;No	Symptomatic	Personal vehicle	Private	Regular	Yes	Never	No	Vegetarian	V
1452	0.062	0	Negative	Male	Contractual Staff	34	CONTRACT WORKER	OS		SU	SU	No	No	No	No	No	No	No	No		No	No	No	No	No	No	No	No	No	No	0	No	0	No	0	No	0	No	No;No;No;No;No;No;No;No;No	Asymptomatic	CYCLE	Private	Never	No	Never	No	Vegetarian	V
1453	0.063	0	Negative	Male	Contractual Staff	30	staff	S		SU	SU	No	No	No	No	No	No	No	No		No	No	No	No	No	No	No	No	No	No	0	No	0	No	0	No	0	No	No;No;No;No;No;No;No;No;No	Asymptomatic	Personal vehicle	Private	Never	No	Never	No	Vegetarian	V
1454	0.063	0	Negative	Male	Contractual Staff	57	CONTRACT WORKER	OS		SU	SU	No	No	No	No	No	No	No	No		No	No	No	No	No	No	No	No	No	No	0	No	0	No	0	No	0	No	No;No;No;No;No;No;No;No;No	Asymptomatic	CYCLE	Private	Regular	Yes	Never	No	Vegetarian	V
1455	0.078	0	Negative	Male	Contractual Staff	50	CONTRACT WORKER	OS		SU	SU	No	No	No	No	No	No	No	No		No	No	No	No	No	No	No	No	No	No	0	No	0	No	0	No	0	No	No;No;No;No;No;No;No;No;No	Asymptomatic	CYCLE	Private	Never	No	Never	No	Vegetarian	V
1456	0.059	0	Negative	Male	Contractual Staff	40	gaurd	OS	A+	A	Positive	No	No	No	No	No	No	No	No		No	No	No	No	No	No		SU		SU	0	No	0	No	0	No	0	No	No;No;No;SU;SU;No;No;No;No	Asymptomatic	Personal vehicle	Private	Never	No	Never	No	Vegetarian	V
1457	0.057	0	Negative	Male	Contractual Staff	30	CONTRACT WORKER	OS		SU	SU	No	No	No	No	No	No	No	No		No	No	No	No	No	No	No	No	No	No	0	No	0	No	0	No	0	No	No;No;No;No;No;No;No;No;No	Asymptomatic	CYCLE	Private	Never	No	Never	No	Vegetarian	V
1458	0.066	0	Negative	Male	Staff	57	staff	S		SU	SU	No	No	Yes	Yes	No	No	No	No		No	No	No	No	No	No		SU		SU	0	No	0	No	0	No	0	No	No;No;No;SU;SU;No;No;No;No	Asymptomatic	Personal vehicle	Private	Never	No	Never	No	Vegetarian	V
1459	0.061	0	Negative	Male	Contractual Staff	44	CONTRACT WORKER	OS		SU	SU	No	No	No	No	No	No	No	No		No	No	No	No	No	No	No	No	No	No	0	No	0	No	0	No	0	No	No;No;No;No;No;No;No;No;No	Asymptomatic	CYCLE	Private	Never	No	Never	No	Vegetarian	V
1460	0.06	0	Negative	Female	Staff	59	housewife	S		SU	SU	No	No	No	No	No	No	No	No		No	No	No	No	No	No	No	No		SU	0	No	0	No	0	No	0	No	No;No;No;No;SU;No;No;No;No	Asymptomatic	Personal vehicle	Private	Never	No	Never	No	Vegetarian	V
1461	0.063	0	Negative	Male	Staff	58	SERVICE	S		SU	SU	No	No	No	No	No	No	No	No		No	No	No	No	No	No	No	No	No	No	0	No	0	No	0	No	0	No	No;No;No;No;No;No;No;No;No	Asymptomatic	CYCLE	Private	Never	No	Never	No	Non vegetarian	NV
1462	0.059	0	Negative	Male	Contractual Staff	34	CONTRACTUAL STAFF	OS	B+	B	Positive	No	No	No	No	No	No	No	No		No	No	No	No	No	No	No	No	No	No	0	No	0	No	0	No	0	No	No;No;No;No;No;No;No;No;No	Asymptomatic	Personal vehicle	Private	Never	No	Never	No	Non vegetarian	NV
1463	0.079	0	Negative	Male	Staff	56	SERVICE	S		SU	SU	No	No	No	No	No	No	No	No		No	No	No	No	No	No	No	No	No	No	0	No	0	No	0	No	0	No	No;No;No;No;No;No;No;No;No	Asymptomatic	CYCLE	Private	Regular	Yes	Never	No	Non vegetarian	NV
1464	0.061	0	Negative	Male	Others	31	staff	S	B-	B	Negative	No	No	No	No	No	No	No	No		No	No	No	No	No	No		SU		SU	0	No	0	No	0	No	0	No	No;No;No;SU;SU;No;No;No;No	Asymptomatic	Personal vehicle	Private	Never	No	Never	No	Occasionally non veg	NV
1465	0.061	0	Negative	Female	Others	30	CONTRACT WORKER	OS		SU	SU	No	No	No	No	No	No	No	No		No	No	No	No	No	No	No	No	No	No	1	No	1	No	0	No	0	No	No;No;No;No;No;No;No;No;No	Asymptomatic	Personal vehicle	Private	Never	No	Never	No	Vegetarian	V
1466	0.066	0	Negative	Male	Contractual Staff	45	CONTRACT WORKER	OS		SU	SU	No	No	No	No	No	No	No	No		No	No	No	No	No	No	No	No	No	No	0	No	0	No	0	No	0	No	No;No;No;No;No;No;No;No;No	Asymptomatic	CYCLE	Private	Regular	Yes	Never	No	Vegetarian	V
1467	0.061	0	Negative	Male	Contractual Staff	29	CONTRACT WORKER	OS		SU	SU	No	No	No	No	No	No	No	No		No	No	No	No	No	No	No	No	No	No	0	No	0	No	0	No	0	No	No;No;No;No;No;No;No;No;No	Asymptomatic	CYCLE	Private	Never	No	Occasionally	Occ	Vegetarian	V
1468	0.06	0	Negative	Female	Others	34	CONTRACT WORKER	OS		SU	SU	No	No	No	No	No	No	No	No		No	No	No	No	No	No	No	No	No	No	1	No	0	No	0	No	0	No	No;No;No;No;No;No;No;No;No	Asymptomatic	Personal vehicle	Private	Never	No	Never	No	Vegetarian	V
1469	0.067	0	Negative	Male	Contractual Staff	26	staff	S		SU	SU	No	No	No	No	No	No	No	No		No	No	Yes	Yes	No	No		SU		SU	0	No	0	No	0	No	0	No	No;Yes;No;SU;SU;No;No;No;No	Symptomatic	Personal vehicle	Private	Never	No	Never	No	Occasionally non veg	NV
1470	0.065	0	Negative	Male	Staff	32	Govt. Job	S	B+	B	Positive	No	No	No	No	No	No	Yes	Yes	Negative	No	No	No	No	No	No	No	No	No	No	0	No	0	No	0	No	0	No	No;No;No;No;No;No;No;No;No	Asymptomatic	Personal vehicle	Private	Never	No	Never	No	Occasionally non veg	NV
1471	0.064	0	Negative	Female	Others	27	Govt. Job	S		SU	SU	No	No	No	No	No	No	No	No		No	No	No	No	No	No	No	No	No	No	0	No	0	No	0	No	0	No	No;No;No;No;No;No;No;No;No	Asymptomatic	Personal vehicle	Private	Never	No	Never	No	Vegetarian	V
1472	0.061	0	Negative	Male	Others	60	staff	S	O+	O	Positive	No	No	No	No	No	No	No	No		No	No	No	No	No	No		SU		SU	0	No	0	No	0	No	0	No	No;No;No;SU;SU;No;No;No;No	Asymptomatic	Personal vehicle	Private	Regular	Yes	Never	No	Vegetarian	V
1473	0.062	0	Negative	Male	Contractual Staff	36	gardner	OS		SU	SU	No	No	No	No	No	No	No	No		No	No	No	No	No	No		SU		SU	0	No	0	No	0	No	0	No	No;No;No;SU;SU;No;No;No;No	Asymptomatic	Personal vehicle	Private	Never	No	Never	No	Vegetarian	V
1474	0.063	0	Negative	Male	Contractual Staff	37	Staff	S		SU	SU	No	No	No	No	No	No	No	No		No	No	No	No	No	No	No	No	No	No	0	No	0	No	0	No	0	No	No;No;No;No;No;No;No;No;No	Asymptomatic	Personal vehicle	Private	Never	No	Never	No	Vegetarian	V
1475	0.071	0	Negative	Male	Contractual Staff	47	gardner	OS		SU	SU	No	No	No	No	No	No	No	No		No	No	No	No	No	No		SU		SU	0	No	0	No	0	No	0	No	No;No;No;SU;SU;No;No;No;No	Asymptomatic	Personal vehicle	Private	Never	No	Never	No	Vegetarian	V
1476	0.066	0	Negative	Male	Contractual Staff	43	sweeper	OS	O	O	SU	No	No	No	No	No	No	No	No		No	No	No	No	No	No	No	No	No	No	0	No	0	No	0	No	0	No	No;No;No;No;No;No;No;No;No	Asymptomatic	Personal vehicle	Private	Never	No	Never	No	Occasionally non veg	NV
1477	0.1	0	Negative	Male	Staff	53	Service	S	A+	A	Positive	No	No	No	No	No	No	No	No		No	No	No	No	No	No	No	No	No	No	1	No	1	No	0	No	0	No	No;No;No;No;No;No;No;No;No	Asymptomatic	Personal vehicle	Private	Never	No	Never	No	Vegetarian	V
1478	0.062	0	Negative	Male	Others	43	reporter	S		SU	SU	No	No	No	No	No	No	No	No		No	No	No	No	No	No		SU		SU	0	No	0	No	0	No	0	No	No;No;No;SU;SU;No;No;No;No	Asymptomatic	Personal vehicle	Private	Never	No	Never	No	Vegetarian	V
1479	0.065	0	Negative	Male	Contractual Staff	38	Staff	S		SU	SU	No	No	No	No	No	No	No	No		No	No	No	No	No	No	No	No	No	No	0	No	0	No	0	No	1	No	No;No;No;No;No;No;No;No;No	Asymptomatic	Personal vehicle	Private	Never	No	Never	No	Occasionally non veg	NV
1480	0.063	0	Negative	Female	Others	39	None	S	B+	B	Positive	No	No	No	No	No	No	No	No		No	No	No	No	No	No	No	No	No	No	3	Yes	1	No	2	No	1	No	No;No;No;No;No;Yes;No;No;No	Symptomatic	Personal vehicle	Private	Never	No	Never	No	Vegetarian	V
1481	0.075	0	Negative	Male	Contractual Staff	43	gaurd	OS	O+	O	Positive	No	No	No	No	No	No	No	No		No	No	No	No	No	No	No	No	No	No	0	No	0	No	0	No	0	No	No;No;No;No;No;No;No;No;No	Asymptomatic	Personal vehicle	Private	Never	No	Never	No	Vegetarian	V
1482	0.063	0	Negative	Male	Staff	41	Principal Scientist	S	B+	B	Positive	No	No	No	No	No	No	No	No		No	No	No	No	No	No	No	No	No	No	3	Yes	2	No	0	No	1	No	No;No;No;No;No;Yes;No;No;No	Symptomatic	Personal vehicle	Private	Regular	Yes	Never	No	Vegetarian	V
1483	0.062	0	Negative	Male	Contractual Staff	37	cook	OS	A+	A	Positive	No	No	No	No	No	No	No	No		No	No	No	No	No	No	No	No	No	No	0	No	0	No	0	No	0	No	No;No;No;No;No;No;No;No;No	Asymptomatic	Personal vehicle	Private	Sporadic	Yes	Never	No	Occasionally non veg	NV
1484	0.064	0	Negative	Female	Others	38	housewife	S		SU	SU	No	No	No	No	No	No	No	No		No	No	Yes	Yes	No	No		SU		SU	0	No	0	No	0	No	0	No	No;Yes;No;SU;SU;No;No;No;No	Symptomatic	Personal vehicle	Private	Never	No	Never	No	Occasionally non veg	NV
1485	0.063	0	Negative	Male	Student	26	Student	S	AB-	AB	Negative	No	No	No	No	No	No	No	No		No	No	No	No	No	No	No	No	No	No	1	No	0	No	0	No	0	No	No;No;No;No;No;No;No;No;No	Asymptomatic	Personal vehicle	Private	Never	No	Never	No	Vegetarian	V
1486	0.065	0	Negative	Female	Others	22	housewife	S		SU	SU	Yes	Yes	Yes	Yes	No	No	No	No		No	No	Yes	Yes	Yes	Yes		SU		SU	0	No	0	No	0	No	0	No	No;Yes;Yes;SU;SU;No;No;No;No	Symptomatic	Personal vehicle	Private	Never	No	Never	No	Occasionally non veg	NV
1487	0.062	0	Negative	Male	Contractual Staff	28	sweeper	OS	A+	A	Positive	No	No	No	No	No	No	No	No		No	No	No	No	No	No	No	No	No	No	0	No	0	No	0	No	0	No	No;No;No;No;No;No;No;No;No	Asymptomatic	Personal vehicle	Private	Never	No	Never	No	Occasionally non veg	NV
1488	0.083	0	Negative	Male	Staff	43	staff	S	O+	O	Positive	No	No	No	No	No	No	No	No		No	No	No	No	No	No	No	No	No	No	0	No	0	No	0	No	0	No	No;No;No;No;No;No;No;No;No	Asymptomatic	Personal vehicle	Private	Never	No	Never	No	Vegetarian	V
1489	0.062	0	Negative	Male	Staff	44	staff	S		SU	SU	No	No	No	No	No	No	No	No		No	No	No	No	No	No		SU		SU	0	No	0	No	0	No	0	No	No;No;No;SU;SU;No;No;No;No	Asymptomatic	Personal vehicle	Private	Never	No	Never	No	Vegetarian	V
1490	0.062	0	Negative	Female	Others	38	House wife	S		SU	SU	No	No	No	No	No	No	No	No		No	No	No	No	No	No	No	No	No	No	0	No	0	No	0	No	0	No	No;No;No;No;No;No;No;No;No	Asymptomatic	Personal vehicle	Private	Never	No	Never	No	Vegetarian	V
1491	0.062	0	Negative	Male	Staff	53	TEACHER	S	B+	B	Positive	Yes	Yes	No	No	No	No	No	No		No	No	No	No	No	No	No	No	No	No	1	No	0	No	0	No	0	No	No;No;No;No;No;No;No;No;No	Asymptomatic	Personal vehicle	Private	Sporadic	Yes	Occasionally	Occ	Non vegetarian	NV
1492	0.062	0	Negative	Male	Contractual Staff	26	Student	S		SU	SU	No	No	No	No	No	No	No	No		No	No	No	No	No	No	No	No	No	No	1	No	0	No	0	No	0	No	No;No;No;No;No;No;No;No;No	Asymptomatic	Personal vehicle	Private	Never	No	Never	No	Vegetarian	V
1493	0.065	0	Negative	Male	Staff	32	Government Employe	S	A+	A	Positive	No	No	No	No	No	No	Yes	Yes	Negative	No	No	No	No	No	No	No	No	No	No	0	No	0	No	0	No	0	No	No;No;No;No;No;No;No;No;No	Asymptomatic	Personal vehicle	Private	Never	No	Never	No	Vegetarian	V
1494	0.061	0	Negative	Female	Others	32	Housewife	S	O+	O	Positive	No	No	No	No	No	No	No	No		No	No	No	No	No	No	No	No	No	No	1	No	1	No	1	No	0	No	No;No;No;No;No;No;No;No;No	Asymptomatic	Personal vehicle	Private	Never	No	Never	No	Vegetarian	V
1495	0.063	0	Negative	Female	Others	29	House maker	S	A+	A	Positive	No	No	No	No	No	No	No	No		No	No	No	No	No	No	No	No	No	No	2	No	0	No	1	No	0	No	No;No;No;No;No;No;No;No;No	Asymptomatic	Personal vehicle	Private	Never	No	Never	No	Vegetarian	V
1496	0.06	0	Negative	Male	Staff	33	Scientist	S	O+	O	Positive	No	No	No	No	No	No	No	No		No	No	No	No	No	No	No	No	No	No	1	No	0	No	0	No	0	No	No;No;No;No;No;No;No;No;No	Asymptomatic	Personal vehicle	Private	Never	No	Never	No	Non vegetarian	NV
1497	0.06	0	Negative	Male	Staff	35	Government Employee	S	AB-	AB	Negative	No	No	No	No	No	No	Yes	Yes	Negative	No	No	No	No	No	No	No	No	No	No	0	No	0	No	0	No	0	No	No;No;No;No;No;No;No;No;No	Asymptomatic	Personal vehicle	Private	Never	No	Never	No	Occasionally non veg	NV
1498	0.389	0	Negative	Female	Others	33	No	S	B+	B	Positive	No	No	No	No	No	No	No	No		No	No	No	No	No	No	No	No	No	No	0	No	0	No	0	No	0	No	No;No;No;No;No;No;No;No;No	Asymptomatic	Personal vehicle	Private	Never	No	Never	No	Occasionally non veg	NV
1499	0.064	0	Negative	Female	Student	18	Student	S		SU	SU	No	No	No	No	No	No	No	No		No	No	No	No	No	No	No	No	No	No	0	No	0	No	0	No	0	No	No;No;No;No;No;No;No;No;No	Asymptomatic	On foot	Private	Never	No	Never	No	Vegetarian	V
1500	0.068	0	Negative	Male	Faculty	46	ceeri employee	S	B+	B	Positive	No	No	No	No	No	No	No	No		No	No	Yes	Yes	No	No	No	No	No	No	0	No	0	No	1	No	0	No	No;Yes;No;No;No;No;No;No;No	Symptomatic	Personal vehicle	Private	Never	No	Occasionally	Occ	Vegetarian	V
1501	0.061	0	Negative	Male	Others	21	student	S	B+	B	Positive	No	No	No	No	No	No	No	No		No	No	No	No	No	No	No	No	No	No	0	No	0	No	0	No	0	No	No;No;No;No;No;No;No;No;No	Asymptomatic	Personal vehicle	Private	Never	No	Never	No	Vegetarian	V
1502	0.062	0	Negative	Male	Others	20	student	S	O+	O	Positive	No	No	No	No	No	No	No	No		No	No	No	No	No	No	No	No	No	No	0	No	0	No	0	No	0	No	No;No;No;No;No;No;No;No;No	Asymptomatic	Personal vehicle	Private	Never	No	Never	No	Vegetarian	V
1503	0.068	0	Negative	Female	Staff	31	Service	S	B+	B	Positive	No	No	No	No	No	No	No	No		No	No	No	No	No	No	No	No	No	No	0	No	0	No	0	No	0	No	No;No;No;No;No;No;No;No;No	Asymptomatic	Cab	Public	Never	No	Never	No	Non vegetarian	NV
1504	0.062	0	Negative	Male	Others	24	Student	S		SU	SU	No	No	No	No	No	No	No	No		No	No	No	No	No	No	No	No	No	No	0	No	0	No	0	No	0	No	No;No;No;No;No;No;No;No;No	Asymptomatic	Personal vehicle	Private	Never	No	Never	No	Vegetarian	V
1505	0.064	0	Negative	Male	Staff	36	Scientist	S	O+	O	Positive	No	No	No	No	No	No	No	No		No	No	No	No	No	No	No	No	No	No	5	Yes	0	No	0	No	0	No	No;No;No;No;No;Yes;No;No;No	Symptomatic	Personal vehicle	Private	Never	No	Never	No	Occasionally non veg	NV
1506	0.061	0	Negative	Male	Staff	53	school staff	S		SU	SU	Yes	Yes	No	No	Yes	Yes	No	No		No	No	No	No	No	No		SU		SU	0	No	0	No	0	No	0	No	No;No;No;SU;SU;No;No;No;No	Asymptomatic	Personal vehicle	Private	Never	No	Occasionally	Occ	Occasionally non veg	NV
1507	0.064	0	Negative	Male	Staff	55	school staff	S		SU	SU	No	No	No	No	No	No	No	No		No	No	Yes	Yes	No	No		SU		SU	1	No	0	No	0	No	0	No	No;Yes;No;SU;SU;No;No;No;No	Symptomatic	Personal vehicle	Private	Regular	Yes	Occasionally	Occ	Occasionally non veg	NV
1508	0.064	0	Negative	Male	Staff	71	staff	S		SU	SU	No	No	No	No	No	No	No	No		No	No	No	No	No	No		SU		SU	1	No	0	No	0	No	0	No	No;No;No;SU;SU;No;No;No;No	Asymptomatic	Personal vehicle	Private	Never	No	Never	No	Occasionally non veg	NV
1509	0.063	0	Negative	Female	Others	65	housewifw	S		SU	SU	Yes	Yes	No	No	No	No	No	No		No	No	No	No	No	No		SU		SU	1	No	0	No	0	No	0	No	No;No;No;SU;SU;No;No;No;No	Asymptomatic	Personal vehicle	Private	Never	No	Never	No	Occasionally non veg	NV
1510	0.065	0	Negative	Female	Others	45	housewife	S		SU	SU	No	No	No	No	No	No	No	No		No	No	No	No	No	No		SU		SU	1	No	0	No	0	No	0	No	No;No;No;SU;SU;No;No;No;No	Asymptomatic	Personal vehicle	Private	Never	No	Never	No	Vegetarian	V
1511	0.064	0	Negative	Female	Others	25	student	S		SU	SU	No	No	No	No	No	No	No	No		No	No	No	No	No	No		SU		SU	0	No	0	No	0	No	0	No	No;No;No;SU;SU;No;No;No;No	Asymptomatic	Personal vehicle	Private	Never	No	Never	No	Vegetarian	V
1512	0.062	0	Negative	Male	Contractual Staff	43	staff	S		SU	SU	No	No	No	No	No	No	No	No		No	No	No	No	No	No		SU		SU	0	No	0	No	0	No	0	No	No;No;No;SU;SU;No;No;No;No	Asymptomatic	Personal vehicle	Private	Regular	Yes	Never	No	Vegetarian	V
1513	0.061	0	Negative	Male	Others	43	service	S		SU	SU	No	No	No	No	No	No	No	No		No	No	No	No	No	No	No	No	No	No	0	No	0	No	0	No	0	No	No;No;No;No;No;No;No;No;No	Asymptomatic	Personal vehicle	Private	Sporadic	Yes	Occasionally	Occ	Occasionally non veg	NV
1514	0.06	0	Negative	Male	Staff	34	service	S	A+	A	Positive	No	No	No	No	No	No	No	No		No	No	No	No	No	No	No	No	No	No	0	No	0	No	0	No	0	No	No;No;No;No;No;No;No;No;No	Asymptomatic	Personal vehicle	Private	Never	No	Occasionally	Occ	Occasionally non veg	NV
1515	0.061	0	Negative	Female	Others	27	H/W	S		SU	SU	No	No	No	No	No	No	No	No		No	No	No	No	No	No	No	No	No	No	0	No	0	No	0	No	0	No	No;No;No;No;No;No;No;No;No	Asymptomatic	Personal vehicle	Private	Never	No	Never	No	Occasionally non veg	NV
1516	0.061	0	Negative	Male	Others	78	ex employee	OS		SU	SU	No	No	Yes	Yes	No	No	No	No		No	No	No	No	No	No		SU		SU	0	No	0	No	0	No	0	No	No;No;No;SU;SU;No;No;No;No	Asymptomatic	Personal vehicle	Private	Never	No	Never	No	Vegetarian	V
1517	0.081	0	Negative	Female	Others	29	Teacher	S	O+	O	Positive	No	No	No	No	No	No	No	No		No	No	No	No	No	No	No	No	No	No	0	No	0	No	0	No	0	No	No;No;No;No;No;No;No;No;No	Asymptomatic	Personal vehicle	Private	Never	No	Never	No	Vegetarian	V
1518	0.101	0	Negative	Male	Contractual Staff	25	Contract worker	OS	B+	B	Positive	No	No	No	No	No	No	Yes	Yes	Negative	No	No	No	No	No	No	No	No	No	No	0	No	0	No	0	No	0	No	No;No;No;No;No;No;No;No;No	Asymptomatic	Personal vehicle	Private	Never	No	Occasionally	Occ	Occasionally non veg	NV
1519	0.066	0	Negative	Female	Others	39	Teacher	S	B+	B	Positive	No	No	No	No	No	No	No	No		No	No	No	No	No	No	No	No	No	No	0	No	0	No	0	No	0	No	No;No;No;No;No;No;No;No;No	Asymptomatic	Personal vehicle	Private	Never	No	Never	No	Vegetarian	V
1520	0.143	0	Negative	Male	Contractual Staff	46	Dhobi	OS		SU	SU	No	No	No	No	No	No	No	No		No	No	No	No	No	No	No	No	No	No	0	No	0	No	0	No	0	No	No;No;No;No;No;No;No;No;No	Asymptomatic	Personal vehicle	Private	Never	No	Never	No	Non vegetarian	NV
1521	0.067	0	Negative	Male	Student	23	student	S	A+	A	Positive	No	No	No	No	No	No	No	No		No	No	No	No	No	No		SU		SU	0	No	0	No	0	No	0	No	No;No;No;SU;SU;No;No;No;No	Asymptomatic	Personal vehicle	Private	Never	No	Never	No	Occasionally non veg	NV
1522	0.063	0	Negative	Female	Others	45	housewife	S		SU	SU	No	No	No	No	No	No	No	No		No	No	No	No	No	No		SU		SU	0	No	0	No	0	No	0	No	No;No;No;SU;SU;No;No;No;No	Asymptomatic	Personal vehicle	Private	Never	No	Never	No	Occasionally non veg	NV
1523	0.088	0	Negative	Female	Student	23	student	S		SU	SU	No	No	No	No	No	No	No	No		No	No	No	No	No	No		SU		SU	0	No	0	No	0	No	0	No	No;No;No;SU;SU;No;No;No;No	Asymptomatic	Personal vehicle	Private	Never	No	Never	No	Vegetarian	V
1524	0.064	0	Negative	Female	Staff	55	HOUSE WIFE	S	O+	O	Positive	No	No	No	No	No	No	No	No		No	No	No	No	No	No	No	No	No	No	0	No	0	No	0	No	0	No	No;No;No;No;No;No;No;No;No	Asymptomatic	Personal vehicle	Private	Never	No	Never	No	Vegetarian	V
1525	0.062	0	Negative	Female	Staff	43	housewife	S		SU	SU	No	No	No	No	No	No	No	No		No	No	No	No	No	No		SU		SU	0	No	0	No	0	No	0	No	No;No;No;SU;SU;No;No;No;No	Asymptomatic	Personal vehicle	Private	Never	No	Never	No	Vegetarian	V
1526	0.065	0	Negative	Male	Staff	39	Government Job in CEERI	S	O+	O	Positive	No	No	No	No	No	No	Yes	Yes	Negative	No	No	No	No	No	No	No	No	No	No	1	No	0	No	0	No	0	No	No;No;No;No;No;No;No;No;No	Asymptomatic	Personal vehicle	Private	Never	No	Never	No	Occasionally non veg	NV
1527	0.06	0	Negative	Male	Staff	26	SERVICE	S	B+	B	Positive	No	No	No	No	No	No	No	No		No	No	No	No	No	No	No	No	No	No	0	No	0	No	0	No	0	No	No;No;No;No;No;No;No;No;No	Asymptomatic	Personal vehicle	Private	Never	No	Never	No	Vegetarian	V
1528	0.062	0	Negative	Male	Contractual Staff	25	staff	S		SU	SU	No	No	No	No	No	No	No	No		No	No	No	No	No	No		SU		SU	0	No	0	No	0	No	0	No	No;No;No;SU;SU;No;No;No;No	Asymptomatic	Personal vehicle	Private	Never	No	Never	No	Occasionally non veg	NV
1529	0.063	0	Negative	Female	Staff	30	HOUSE WIFE	S		SU	SU	No	No	No	No	No	No	No	No		No	No	No	No	No	No	No	No	No	No	0	No	0	No	0	No	0	No	No;No;No;No;No;No;No;No;No	Asymptomatic	Personal vehicle	Private	Never	No	Never	No	Vegetarian	V
1530	0.061	0	Negative	Male	Student	27	student	S	B+	B	Positive	No	No	No	No	No	No	No	No		No	No	No	No	No	No		SU		SU	0	No	0	No	0	No	0	No	No;No;No;SU;SU;No;No;No;No	Asymptomatic	Personal vehicle	Private	Never	No	Never	No	Vegetarian	V
1531	0.061	0	Negative	Male	Contractual Staff	28	staff	S		SU	SU	No	No	No	No	No	No	No	No		No	No	No	No	No	No		SU		SU	0	No	0	No	0	No	0	No	No;No;No;SU;SU;No;No;No;No	Asymptomatic	Personal vehicle	Private	Never	No	Never	No	Occasionally non veg	NV
1532	0.07	0	Negative	Female	Contractual Staff	20	STUDENT	S	AB+	AB	Positive	No	No	No	No	No	No	No	No		No	No	No	No	No	No	No	No	No	No	0	No	0	No	0	No	0	No	No;No;No;No;No;No;No;No;No	Asymptomatic	Personal vehicle	Private	Never	No	Never	No	Vegetarian	V
1533	0.063	0	Negative	Male	Staff	58	staff	S		SU	SU	No	No	No	No	No	No	No	No		No	No	No	No	No	No		SU		SU	0	No	0	No	0	No	0	No	No;No;No;SU;SU;No;No;No;No	Asymptomatic	Personal vehicle	Private	Regular	Yes	Occasionally	Occ	Occasionally non veg	NV
1534	0.07	0	Negative	Male	Contractual Staff	38	staff	S		SU	SU	No	No	No	No	No	No	No	No		No	No	No	No	No	No		SU		SU	1	No	0	No	0	No	0	No	No;No;No;SU;SU;No;No;No;No	Asymptomatic	Personal vehicle	Private	Never	No	Never	No	Occasionally non veg	NV
1535	0.067	0	Negative	Female	Contractual Staff	35	houswife	S		SU	SU	No	No	No	No	No	No	No	No		No	No	No	No	No	No		SU		SU	0	No	0	No	0	No	0	No	No;No;No;SU;SU;No;No;No;No	Asymptomatic	Personal vehicle	Private	Never	No	Never	No	Occasionally non veg	NV
1536	0.066	0	Negative	Male	Staff	64	EX EMPLOYEE	S	A+	A	Positive	No	No	No	No	No	No	No	No		No	No	No	No	No	No	No	No	No	No	0	No	0	No	0	No	0	No	No;No;No;No;No;No;No;No;No	Asymptomatic	Personal vehicle	Private	Never	No	Never	No	Vegetarian	V
1537	0.078	0	Negative	Female	Staff	58	HOUSE WIFE	S		SU	SU	No	No	No	No	No	No	No	No		No	No	No	No	No	No	No	No	No	No	0	No	0	No	0	No	0	No	No;No;No;No;No;No;No;No;No	Asymptomatic	Personal vehicle	Private	Never	No	Never	No	Vegetarian	V
1538	0.061	0	Negative	Female	Student	19	student	S		SU	SU	No	No	No	No	No	No	No	No		No	No	No	No	No	No		SU		SU	0	No	0	No	0	No	0	No	No;No;No;SU;SU;No;No;No;No	Asymptomatic	Personal vehicle	Private	Never	No	Never	No	Vegetarian	V
1539	0.062	0	Negative	Female	Others	45	housewife	S		SU	SU	No	No	No	No	No	No	No	No		No	No	No	No	No	No		SU		SU	1	No	0	No	0	No	0	No	No;No;No;SU;SU;No;No;No;No	Asymptomatic	Personal vehicle	Private	Never	No	Never	No	Vegetarian	V
1540	0.066	0	Negative	Male	Student	18	Student	S	B+	B	Positive	No	No	No	No	No	No	No	No		No	No	No	No	No	No	No	No	No	No	0	No	1	No	0	No	0	No	No;No;No;No;No;No;No;No;No	Asymptomatic	Personal vehicle	Private	Never	No	Never	No	Occasionally non veg	NV
1541	0.065	0	Negative	Female	Student	21	student	S	B+	B	Positive	No	No	No	No	No	No	No	No		No	No	No	No	No	No	No	No	No	No	1	No	0	No	0	No	0	No	No;No;No;No;No;No;No;No;No	Asymptomatic	Personal vehicle	Private	Never	No	Never	No	Occasionally non veg	NV
1542	0.065	0	Negative	Male	Contractual Staff	50	staff	S		SU	SU	No	No	No	No	No	No	No	No		No	No	No	No	No	No		SU		SU	1	No	0	No	0	No	0	No	No;No;No;SU;SU;No;No;No;No	Asymptomatic	Personal vehicle	Private	Regular	Yes	Never	No	Vegetarian	V
1543	0.065	0	Negative	Male	Staff	50		S	B +ve	B	Positive		SU		SU		SU		SU			SU		SU		SU		SU		SU	Blank	SU	Blank	SU	Blank	SU	Blank	SU	SU;SU;SU;SU;SU;SU;SU;SU;SU	SU		SU		SU		SU		SU
1544	0.077	0	Negative	Male	Staff	41		S	O +ve	O	Positive		SU		SU		SU		SU			SU		SU		SU		SU		SU	Blank	SU	Blank	SU	Blank	SU	Blank	SU	SU;SU;SU;SU;SU;SU;SU;SU;SU	SU		SU		SU		SU		SU
1545	0.07	0	Negative	Female	Student	32		S	A +ve	A	Positive		SU		SU		SU		SU			SU		SU		SU		SU		SU	Blank	SU	Blank	SU	Blank	SU	Blank	SU	SU;SU;SU;SU;SU;SU;SU;SU;SU	SU		SU		SU		SU		SU
1546	0.067	0	Negative	Male	Student	28		S	B +ve	B	Positive		SU		SU		SU		SU			SU		SU		SU		SU		SU	Blank	SU	Blank	SU	Blank	SU	Blank	SU	SU;SU;SU;SU;SU;SU;SU;SU;SU	SU		SU		SU		SU		SU
1547	0.066	0	Negative	Female	Student	25		S	A +ve	A	Positive		SU		SU		SU		SU			SU		SU		SU		SU		SU	Blank	SU	Blank	SU	Blank	SU	Blank	SU	SU;SU;SU;SU;SU;SU;SU;SU;SU	SU		SU		SU		SU		SU
1548	0.066	0	Negative	Female	student	28		S	O +ve	O	Positive		SU		SU		SU		SU			SU		SU		SU		SU		SU	Blank	SU	Blank	SU	Blank	SU	Blank	SU	SU;SU;SU;SU;SU;SU;SU;SU;SU	SU		SU		SU		SU		SU
1549	0.111	0	Negative	Male	Staff	42		S	O +ve	O	Positive		SU		SU		SU		SU			SU		SU		SU		SU		SU	Blank	SU	Blank	SU	Blank	SU	Blank	SU	SU;SU;SU;SU;SU;SU;SU;SU;SU	SU		SU		SU		SU		SU
1550	0.064	0	Negative	Male	Staff	54		S	B +ve	B	Positive		SU		SU		SU		SU			SU		SU		SU		SU		SU	Blank	SU	Blank	SU	Blank	SU	Blank	SU	SU;SU;SU;SU;SU;SU;SU;SU;SU	SU		SU		SU		SU		SU
1551	0.067	0	Negative	Female	Student	26		S	AB +ve	AB	Positive		SU		SU		SU		SU			SU		SU		SU		SU		SU	Blank	SU	Blank	SU	Blank	SU	Blank	SU	SU;SU;SU;SU;SU;SU;SU;SU;SU	SU		SU		SU		SU		SU
1552	0.069	0	Negative	Male	Staff	38		S	O +ve	O	Positive		SU		SU		SU		SU			SU		SU		SU		SU		SU	Blank	SU	Blank	SU	Blank	SU	Blank	SU	SU;SU;SU;SU;SU;SU;SU;SU;SU	SU		SU		SU		SU		SU
1553	0.069	0	Negative	Female	Student	27		S	AB +ve	AB	Positive		SU		SU		SU		SU			SU		SU		SU		SU		SU	Blank	SU	Blank	SU	Blank	SU	Blank	SU	SU;SU;SU;SU;SU;SU;SU;SU;SU	SU		SU		SU		SU		SU
1554	0.066	0	Negative	Male	Staff	37		S	O +ve	O	Positive		SU		SU		SU		SU			SU		SU		SU		SU		SU	Blank	SU	Blank	SU	Blank	SU	Blank	SU	SU;SU;SU;SU;SU;SU;SU;SU;SU	SU		SU		SU		SU		SU
1555	0.068	0	Negative	Male	Staff	53		S	B +ve	B	Positive		SU		SU		SU		SU			SU		SU		SU		SU		SU	Blank	SU	Blank	SU	Blank	SU	Blank	SU	SU;SU;SU;SU;SU;SU;SU;SU;SU	SU		SU		SU		SU		SU
1556	0.065	0	Negative	Male	Staff	47		S	B +ve	B	Positive		SU		SU		SU		SU			SU		SU		SU		SU		SU	Blank	SU	Blank	SU	Blank	SU	Blank	SU	SU;SU;SU;SU;SU;SU;SU;SU;SU	SU		SU		SU		SU		SU
1557	0.06	0	Negative	Male	Staff	48		S	A +ve	A	Positive		SU		SU		SU		SU			SU		SU		SU		SU		SU	Blank	SU	Blank	SU	Blank	SU	Blank	SU	SU;SU;SU;SU;SU;SU;SU;SU;SU	SU		SU		SU		SU		SU
1558	0.07	0	Negative	Female	Staff	43		S	B +ve	B	Positive		SU		SU		SU		SU			SU		SU		SU		SU		SU	Blank	SU	Blank	SU	Blank	SU	Blank	SU	SU;SU;SU;SU;SU;SU;SU;SU;SU	SU		SU		SU		SU		SU
1559	0.08	0	Negative	Female	Staff	47		S	A -ve	A	Negative		SU		SU		SU		SU			SU		SU		SU		SU		SU	Blank	SU	Blank	SU	Blank	SU	Blank	SU	SU;SU;SU;SU;SU;SU;SU;SU;SU	SU		SU		SU		SU		SU
1560	0.07	0	Negative	Female	Student	23		S	A+ ve	A	Positive		SU		SU		SU		SU			SU		SU		SU		SU		SU	Blank	SU	Blank	SU	Blank	SU	Blank	SU	SU;SU;SU;SU;SU;SU;SU;SU;SU	SU		SU		SU		SU		SU
1561	0.198	0	Negative	Female	student	29		S	B +ve	B	Positive		SU		SU		SU		SU			SU		SU		SU		SU		SU	Blank	SU	Blank	SU	Blank	SU	Blank	SU	SU;SU;SU;SU;SU;SU;SU;SU;SU	SU		SU		SU		SU		SU
1562	0.102	0	Negative	Male	student	36		S	O +ve	O	Positive		SU		SU		SU		SU			SU		SU		SU		SU		SU	Blank	SU	Blank	SU	Blank	SU	Blank	SU	SU;SU;SU;SU;SU;SU;SU;SU;SU	SU		SU		SU		SU		SU
1563	0.063	0	Negative	Female	Student	27		S	B +ve	B	Positive		SU		SU		SU		SU			SU		SU		SU		SU		SU	Blank	SU	Blank	SU	Blank	SU	Blank	SU	SU;SU;SU;SU;SU;SU;SU;SU;SU	SU		SU		SU		SU		SU
1564	0.065	0	Negative	Female	Student	33		S	A +ve	A	Positive		SU		SU		SU		SU			SU		SU		SU		SU		SU	Blank	SU	Blank	SU	Blank	SU	Blank	SU	SU;SU;SU;SU;SU;SU;SU;SU;SU	SU		SU		SU		SU		SU
1565	0.066	0	Negative	Female	Student	25		S	A +ve	A	Positive		SU		SU		SU		SU			SU		SU		SU		SU		SU	Blank	SU	Blank	SU	Blank	SU	Blank	SU	SU;SU;SU;SU;SU;SU;SU;SU;SU	SU		SU		SU		SU		SU
1566	32.21	1	Positive	Female	Student	25		S	B+ve	B	Positive		SU		SU		SU		SU			SU		SU		SU		SU		SU	Blank	SU	Blank	SU	Blank	SU	Blank	SU	SU;SU;SU;SU;SU;SU;SU;SU;SU	SU		SU		SU		SU		SU
1567	0.075	0	Negative	Female	Student	26		S	B+ve	B	Positive		SU		SU		SU		SU			SU		SU		SU		SU		SU	Blank	SU	Blank	SU	Blank	SU	Blank	SU	SU;SU;SU;SU;SU;SU;SU;SU;SU	SU		SU		SU		SU		SU
1568	0.065	0	Negative	Female	Student	28		S	B+ve	B	Positive		SU		SU		SU		SU			SU		SU		SU		SU		SU	Blank	SU	Blank	SU	Blank	SU	Blank	SU	SU;SU;SU;SU;SU;SU;SU;SU;SU	SU		SU		SU		SU		SU
1569	49.96	1	Positive	Male	Labour	30		OS	O +ve	O	Positive		SU		SU		SU		SU			SU		SU		SU		SU		SU	Blank	SU	Blank	SU	Blank	SU	Blank	SU	SU;SU;SU;SU;SU;SU;SU;SU;SU	SU		SU		SU		SU		SU
1570	0.069	0	Negative	Male	Labour	49		OS	O +ve	O	Positive		SU		SU		SU		SU			SU		SU		SU		SU		SU	Blank	SU	Blank	SU	Blank	SU	Blank	SU	SU;SU;SU;SU;SU;SU;SU;SU;SU	SU		SU		SU		SU		SU
1571	0.067	0	Negative	Male	Student	29		S	B+ve	B	Positive		SU		SU		SU		SU			SU		SU		SU		SU		SU	Blank	SU	Blank	SU	Blank	SU	Blank	SU	SU;SU;SU;SU;SU;SU;SU;SU;SU	SU		SU		SU		SU		SU
1572	0.067	0	Negative	Male	Student	29		S	B+ve	B	Positive		SU		SU		SU		SU			SU		SU		SU		SU		SU	Blank	SU	Blank	SU	Blank	SU	Blank	SU	SU;SU;SU;SU;SU;SU;SU;SU;SU	SU		SU		SU		SU		SU
1573	0.067	0	Negative	Female	Student	25		S	A+ve	A	Positive		SU		SU		SU		SU			SU		SU		SU		SU		SU	Blank	SU	Blank	SU	Blank	SU	Blank	SU	SU;SU;SU;SU;SU;SU;SU;SU;SU	SU		SU		SU		SU		SU
1574	0.07	0	Negative	Male	Staff	60		S	B+ve	B	Positive		SU		SU		SU		SU			SU		SU		SU		SU		SU	Blank	SU	Blank	SU	Blank	SU	Blank	SU	SU;SU;SU;SU;SU;SU;SU;SU;SU	SU		SU		SU		SU		SU
1575	0.661	0	Negative	Male	Student	27		S	A+ve	A	Positive		SU		SU		SU		SU			SU		SU		SU		SU		SU	Blank	SU	Blank	SU	Blank	SU	Blank	SU	SU;SU;SU;SU;SU;SU;SU;SU;SU	SU		SU		SU		SU		SU
1576	0.068	0	Negative	Female	Staff	49		S	O+ve	O	Positive		SU		SU		SU		SU			SU		SU		SU		SU		SU	Blank	SU	Blank	SU	Blank	SU	Blank	SU	SU;SU;SU;SU;SU;SU;SU;SU;SU	SU		SU		SU		SU		SU
1577	0.067	0	Negative	Male	Student	36		S	O+ve	O	Positive		SU		SU		SU		SU			SU		SU		SU		SU		SU	Blank	SU	Blank	SU	Blank	SU	Blank	SU	SU;SU;SU;SU;SU;SU;SU;SU;SU	SU		SU		SU		SU		SU
1578	0.07	0	Negative	Male	Student	27		S	B+ve	B	Positive		SU		SU		SU		SU			SU		SU		SU		SU		SU	Blank	SU	Blank	SU	Blank	SU	Blank	SU	SU;SU;SU;SU;SU;SU;SU;SU;SU	SU		SU		SU		SU		SU
1579	0.071	0	Negative	Female	Student	26		S	A+ve	A	Positive		SU		SU		SU		SU			SU		SU		SU		SU		SU	Blank	SU	Blank	SU	Blank	SU	Blank	SU	SU;SU;SU;SU;SU;SU;SU;SU;SU	SU		SU		SU		SU		SU
1580	0.067	0	Negative	Female	Student	25		S	A+ve	A	Positive		SU		SU		SU		SU			SU		SU		SU		SU		SU	Blank	SU	Blank	SU	Blank	SU	Blank	SU	SU;SU;SU;SU;SU;SU;SU;SU;SU	SU		SU		SU		SU		SU
1581	0.066	0	Negative	Female	Student	23		S	O+ve	O	Positive		SU		SU		SU		SU			SU		SU		SU		SU		SU	Blank	SU	Blank	SU	Blank	SU	Blank	SU	SU;SU;SU;SU;SU;SU;SU;SU;SU	SU		SU		SU		SU		SU
1582	0.069	0	Negative	Male	Student	29		S	B+ve	B	Positive		SU		SU		SU		SU			SU		SU		SU		SU		SU	Blank	SU	Blank	SU	Blank	SU	Blank	SU	SU;SU;SU;SU;SU;SU;SU;SU;SU	SU		SU		SU		SU		SU
1583	0.065	0	Negative	Female	Student	30		S	B+ve	B	Positive		SU		SU		SU		SU			SU		SU		SU		SU		SU	Blank	SU	Blank	SU	Blank	SU	Blank	SU	SU;SU;SU;SU;SU;SU;SU;SU;SU	SU		SU		SU		SU		SU
1584	0.066	0	Negative	Male	Student	34		S	B +ve	B	Positive		SU		SU		SU		SU			SU		SU		SU		SU		SU	Blank	SU	Blank	SU	Blank	SU	Blank	SU	SU;SU;SU;SU;SU;SU;SU;SU;SU	SU		SU		SU		SU		SU
1585	0.972	0	Negative	Male	Labor	53		OS	O +ve	O	Positive		SU		SU		SU		SU			SU		SU		SU		SU		SU	Blank	SU	Blank	SU	Blank	SU	Blank	SU	SU;SU;SU;SU;SU;SU;SU;SU;SU	SU		SU		SU		SU		SU
1586	0.128	0	Negative	Male	Labor	40		OS	O +ve	O	Positive		SU		SU		SU		SU			SU		SU		SU		SU		SU	Blank	SU	Blank	SU	Blank	SU	Blank	SU	SU;SU;SU;SU;SU;SU;SU;SU;SU	SU		SU		SU		SU		SU
1587	0.07	0	Negative	Male	Labor	50		OS	O +ve	O	Positive		SU		SU		SU		SU			SU		SU		SU		SU		SU	Blank	SU	Blank	SU	Blank	SU	Blank	SU	SU;SU;SU;SU;SU;SU;SU;SU;SU	SU		SU		SU		SU		SU
1588	13.25	1	Positive	Male	Staff	59		S	A +ve	A	Positive		SU		SU		SU		SU			SU		SU		SU		SU		SU	Blank	SU	Blank	SU	Blank	SU	Blank	SU	SU;SU;SU;SU;SU;SU;SU;SU;SU	SU		SU		SU		SU		SU
1589	0.067	0	Negative	Male	Staff	44		S	O-ve	O	Negative		SU		SU		SU		SU			SU		SU		SU		SU		SU	Blank	SU	Blank	SU	Blank	SU	Blank	SU	SU;SU;SU;SU;SU;SU;SU;SU;SU	SU		SU		SU		SU		SU
1590	0.068	0	Negative	Female	Student	30		S	O +ve	O	Positive		SU		SU		SU		SU			SU		SU		SU		SU		SU	Blank	SU	Blank	SU	Blank	SU	Blank	SU	SU;SU;SU;SU;SU;SU;SU;SU;SU	SU		SU		SU		SU		SU
1591	0.073	0	Negative	Female	Student	26		S	B+ve	B	Positive		SU		SU		SU		SU			SU		SU		SU		SU		SU	Blank	SU	Blank	SU	Blank	SU	Blank	SU	SU;SU;SU;SU;SU;SU;SU;SU;SU	SU		SU		SU		SU		SU
1592	0.064	0	Negative	Female	Student	26		S	A +ve	A	Positive		SU		SU		SU		SU			SU		SU		SU		SU		SU	Blank	SU	Blank	SU	Blank	SU	Blank	SU	SU;SU;SU;SU;SU;SU;SU;SU;SU	SU		SU		SU		SU		SU
1593	0.071	0	Negative	Male	Labor	39		OS	O + ve	O	Positive		SU		SU		SU		SU			SU		SU		SU		SU		SU	Blank	SU	Blank	SU	Blank	SU	Blank	SU	SU;SU;SU;SU;SU;SU;SU;SU;SU	SU		SU		SU		SU		SU
1594	0.066	0	Negative	Female	Staff	49		S	A +ve	A	Positive		SU		SU		SU		SU			SU		SU		SU		SU		SU	Blank	SU	Blank	SU	Blank	SU	Blank	SU	SU;SU;SU;SU;SU;SU;SU;SU;SU	SU		SU		SU		SU		SU
1595	0.067	0	Negative	Female	Student	24		S	B +ve	B	Positive		SU		SU		SU		SU			SU		SU		SU		SU		SU	Blank	SU	Blank	SU	Blank	SU	Blank	SU	SU;SU;SU;SU;SU;SU;SU;SU;SU	SU		SU		SU		SU		SU
1596	0.067	0	Negative	Female	Student	25		S	O +ve	O	Positive		SU		SU		SU		SU			SU		SU		SU		SU		SU	Blank	SU	Blank	SU	Blank	SU	Blank	SU	SU;SU;SU;SU;SU;SU;SU;SU;SU	SU		SU		SU		SU		SU
1597	0.063	0	Negative	Female	Student	24		S	B +ve	B	Positive		SU		SU		SU		SU			SU		SU		SU		SU		SU	Blank	SU	Blank	SU	Blank	SU	Blank	SU	SU;SU;SU;SU;SU;SU;SU;SU;SU	SU		SU		SU		SU		SU
1598	0.067	0	Negative	Male	Student	26		S	A +ve	A	Positive		SU		SU		SU		SU			SU		SU		SU		SU		SU	Blank	SU	Blank	SU	Blank	SU	Blank	SU	SU;SU;SU;SU;SU;SU;SU;SU;SU	SU		SU		SU		SU		SU
1599	0.062	0	Negative	Male	Staff	40		S	O +ve	O	Positive		SU		SU		SU		SU			SU		SU		SU		SU		SU	Blank	SU	Blank	SU	Blank	SU	Blank	SU	SU;SU;SU;SU;SU;SU;SU;SU;SU	SU		SU		SU		SU		SU
1600	0.074	0	Negative	Male	Staff	53		S	B +ve	B	Positive		SU		SU		SU		SU			SU		SU		SU		SU		SU	Blank	SU	Blank	SU	Blank	SU	Blank	SU	SU;SU;SU;SU;SU;SU;SU;SU;SU	SU		SU		SU		SU		SU
1601	0.068	0	Negative	Male	Labor	47		OS	A +ve	A	Positive		SU		SU		SU		SU			SU		SU		SU		SU		SU	Blank	SU	Blank	SU	Blank	SU	Blank	SU	SU;SU;SU;SU;SU;SU;SU;SU;SU	SU		SU		SU		SU		SU
1602	0.069	0	Negative	Male	Staff	44		S	O +ve	O	Positive		SU		SU		SU		SU			SU		SU		SU		SU		SU	Blank	SU	Blank	SU	Blank	SU	Blank	SU	SU;SU;SU;SU;SU;SU;SU;SU;SU	SU		SU		SU		SU		SU
1603	0.069	0	Negative	Female	Student	29		S	O +ve	O	Positive		SU		SU		SU		SU			SU		SU		SU		SU		SU	Blank	SU	Blank	SU	Blank	SU	Blank	SU	SU;SU;SU;SU;SU;SU;SU;SU;SU	SU		SU		SU		SU		SU
1604	0.066	0	Negative	Female	Student	27		S	O +ve	O	Positive		SU		SU		SU		SU			SU		SU		SU		SU		SU	Blank	SU	Blank	SU	Blank	SU	Blank	SU	SU;SU;SU;SU;SU;SU;SU;SU;SU	SU		SU		SU		SU		SU
1605	0.07	0	Negative	Female	Student	31		S	B +ve	B	Positive		SU		SU		SU		SU			SU		SU		SU		SU		SU	Blank	SU	Blank	SU	Blank	SU	Blank	SU	SU;SU;SU;SU;SU;SU;SU;SU;SU	SU		SU		SU		SU		SU
1606	0.064	0	Negative	Male	Staff	42		S	O +ve	O	Positive		SU		SU		SU		SU			SU		SU		SU		SU		SU	Blank	SU	Blank	SU	Blank	SU	Blank	SU	SU;SU;SU;SU;SU;SU;SU;SU;SU	SU		SU		SU		SU		SU
1607	4.81	1	Positive	Male	Staff	46		S	AB -ve	AB	Negative		SU		SU		SU		SU			SU		SU		SU		SU		SU	Blank	SU	Blank	SU	Blank	SU	Blank	SU	SU;SU;SU;SU;SU;SU;SU;SU;SU	SU		SU		SU		SU		SU
1608	0.129	0	Negative	Male	Staff	49		S	A +ve	A	Positive		SU		SU		SU		SU			SU		SU		SU		SU		SU	Blank	SU	Blank	SU	Blank	SU	Blank	SU	SU;SU;SU;SU;SU;SU;SU;SU;SU	SU		SU		SU		SU		SU
1609	0.068	0	Negative	Male	Staff	46		S	O+ve	O	Positive		SU		SU		SU		SU			SU		SU		SU		SU		SU	Blank	SU	Blank	SU	Blank	SU	Blank	SU	SU;SU;SU;SU;SU;SU;SU;SU;SU	SU		SU		SU		SU		SU
1610	0.07	0	Negative	Male	Staff	55		S	B +ve	B	Positive		SU		SU		SU		SU			SU		SU		SU		SU		SU	Blank	SU	Blank	SU	Blank	SU	Blank	SU	SU;SU;SU;SU;SU;SU;SU;SU;SU	SU		SU		SU		SU		SU
1611	0.072	0	Negative	Female	Staff	45		S	O +ve	O	Positive		SU		SU		SU		SU			SU		SU		SU		SU		SU	Blank	SU	Blank	SU	Blank	SU	Blank	SU	SU;SU;SU;SU;SU;SU;SU;SU;SU	SU		SU		SU		SU		SU
1612	0.073	0	Negative	Female	NPIC staff	37		S	A +ve	A	Positive		SU		SU		SU		SU			SU		SU		SU		SU		SU	Blank	SU	Blank	SU	Blank	SU	Blank	SU	SU;SU;SU;SU;SU;SU;SU;SU;SU	SU		SU		SU		SU		SU
1613	0.067	0	Negative	Female	Staff	42		S	O +ve	O	Positive		SU		SU		SU		SU			SU		SU		SU		SU		SU	Blank	SU	Blank	SU	Blank	SU	Blank	SU	SU;SU;SU;SU;SU;SU;SU;SU;SU	SU		SU		SU		SU		SU
1614	0.068	0	Negative	Male	Staff	50		S	O +ve	O	Positive		SU		SU		SU		SU			SU		SU		SU		SU		SU	Blank	SU	Blank	SU	Blank	SU	Blank	SU	SU;SU;SU;SU;SU;SU;SU;SU;SU	SU		SU		SU		SU		SU
1615	0.064	0	Negative	Male	Staff	52		S	O +ve	O	Positive		SU		SU		SU		SU			SU		SU		SU		SU		SU	Blank	SU	Blank	SU	Blank	SU	Blank	SU	SU;SU;SU;SU;SU;SU;SU;SU;SU	SU		SU		SU		SU		SU
1616	0.063	0	Negative	Male	Labor	48		OS	O +ve	O	Positive		SU		SU		SU		SU			SU		SU		SU		SU		SU	Blank	SU	Blank	SU	Blank	SU	Blank	SU	SU;SU;SU;SU;SU;SU;SU;SU;SU	SU		SU		SU		SU		SU
1617	0.066	0	Negative	Male	Labor	42		OS	O +ve	O	Positive		SU		SU		SU		SU			SU		SU		SU		SU		SU	Blank	SU	Blank	SU	Blank	SU	Blank	SU	SU;SU;SU;SU;SU;SU;SU;SU;SU	SU		SU		SU		SU		SU
1618	0.064	0	Negative	Male	Staff	54		S	O +ve	O	Positive		SU		SU		SU		SU			SU		SU		SU		SU		SU	Blank	SU	Blank	SU	Blank	SU	Blank	SU	SU;SU;SU;SU;SU;SU;SU;SU;SU	SU		SU		SU		SU		SU
1619	0.073	0	Negative	Male	Student	32		S	O -ve	O	Negative		SU		SU		SU		SU			SU		SU		SU		SU		SU	Blank	SU	Blank	SU	Blank	SU	Blank	SU	SU;SU;SU;SU;SU;SU;SU;SU;SU	SU		SU		SU		SU		SU
1620	33.68	1	Positive	Male	Staff	51		S	B +ve	B	Positive		SU		SU		SU		SU			SU		SU		SU		SU		SU	Blank	SU	Blank	SU	Blank	SU	Blank	SU	SU;SU;SU;SU;SU;SU;SU;SU;SU	SU		SU		SU		SU		SU
1621	4.55	1	Positive	Female	Student	29		S	B +ve	B	Positive		SU		SU		SU		SU			SU		SU		SU		SU		SU	Blank	SU	Blank	SU	Blank	SU	Blank	SU	SU;SU;SU;SU;SU;SU;SU;SU;SU	SU		SU		SU		SU		SU
1622	55.72	1	Positive	Male	Student	29		S	O +ve	O	Positive		SU		SU		SU		SU			SU		SU		SU		SU		SU	Blank	SU	Blank	SU	Blank	SU	Blank	SU	SU;SU;SU;SU;SU;SU;SU;SU;SU	SU		SU		SU		SU		SU
1623	0.089	0	Negative	Female	Student	27		S	O +ve	O	Positive		SU		SU		SU		SU			SU		SU		SU		SU		SU	Blank	SU	Blank	SU	Blank	SU	Blank	SU	SU;SU;SU;SU;SU;SU;SU;SU;SU	SU		SU		SU		SU		SU
1624	0.066	0	Negative	Male	Student	27		S	O +ve	O	Positive		SU		SU		SU		SU			SU		SU		SU		SU		SU	Blank	SU	Blank	SU	Blank	SU	Blank	SU	SU;SU;SU;SU;SU;SU;SU;SU;SU	SU		SU		SU		SU		SU
1625	13.96	1	Positive	Female	Student	27		S	AB +ve	AB	Positive		SU		SU		SU		SU			SU		SU		SU		SU		SU	Blank	SU	Blank	SU	Blank	SU	Blank	SU	SU;SU;SU;SU;SU;SU;SU;SU;SU	SU		SU		SU		SU		SU
1626	0.068	0	Negative	Male	Staff	39		S	A +ve	A	Positive		SU		SU		SU		SU			SU		SU		SU		SU		SU	Blank	SU	Blank	SU	Blank	SU	Blank	SU	SU;SU;SU;SU;SU;SU;SU;SU;SU	SU		SU		SU		SU		SU
1627	0.06	0	Negative	Female	Student	28		S	B +ve	B	Positive		SU		SU		SU		SU			SU		SU		SU		SU		SU	Blank	SU	Blank	SU	Blank	SU	Blank	SU	SU;SU;SU;SU;SU;SU;SU;SU;SU	SU		SU		SU		SU		SU
1628	0.08	0	Negative	Female	Student	29		S	B +ve	B	Positive		SU		SU		SU		SU			SU		SU		SU		SU		SU	Blank	SU	Blank	SU	Blank	SU	Blank	SU	SU;SU;SU;SU;SU;SU;SU;SU;SU	SU		SU		SU		SU		SU
1629	0.065	0	Negative	Female	Student	32		S	O +ve	O	Positive		SU		SU		SU		SU			SU		SU		SU		SU		SU	Blank	SU	Blank	SU	Blank	SU	Blank	SU	SU;SU;SU;SU;SU;SU;SU;SU;SU	SU		SU		SU		SU		SU
1630	0.068	0	Negative	Male	Labor	45		OS	O +ve	O	Positive		SU		SU		SU		SU			SU		SU		SU		SU		SU	Blank	SU	Blank	SU	Blank	SU	Blank	SU	SU;SU;SU;SU;SU;SU;SU;SU;SU	SU		SU		SU		SU		SU
1631	0.068	0	Negative	Male	Staff	39		S	B -ve	B	Negative		SU		SU		SU		SU			SU		SU		SU		SU		SU	Blank	SU	Blank	SU	Blank	SU	Blank	SU	SU;SU;SU;SU;SU;SU;SU;SU;SU	SU		SU		SU		SU		SU
1632	11.56	1	Positive	Male	Staff	66		S	O +ve	O	Positive		SU		SU		SU		SU			SU		SU		SU		SU		SU	Blank	SU	Blank	SU	Blank	SU	Blank	SU	SU;SU;SU;SU;SU;SU;SU;SU;SU	SU		SU		SU		SU		SU
1633	0.069	0	Negative	Male	Labor	48		OS	O +ve	O	Positive		SU		SU		SU		SU			SU		SU		SU		SU		SU	Blank	SU	Blank	SU	Blank	SU	Blank	SU	SU;SU;SU;SU;SU;SU;SU;SU;SU	SU		SU		SU		SU		SU
1634	0.084	0	Negative	Female	Student	28		S	A +ve	A	Positive		SU		SU		SU		SU			SU		SU		SU		SU		SU	Blank	SU	Blank	SU	Blank	SU	Blank	SU	SU;SU;SU;SU;SU;SU;SU;SU;SU	SU		SU		SU		SU		SU
1635	0.065	0	Negative	Female	Student	27		S	AB +Ve	AB	Positive		SU		SU		SU		SU			SU		SU		SU		SU		SU	Blank	SU	Blank	SU	Blank	SU	Blank	SU	SU;SU;SU;SU;SU;SU;SU;SU;SU	SU		SU		SU		SU		SU
1636	27.86	1	Positive	Female	Student	33		S	B +ve	B	Positive		SU		SU		SU		SU			SU		SU		SU		SU		SU	Blank	SU	Blank	SU	Blank	SU	Blank	SU	SU;SU;SU;SU;SU;SU;SU;SU;SU	SU		SU		SU		SU		SU
1637	0.305	0	Negative	Male	Staff	51		S	B +ve	B	Positive		SU		SU		SU		SU			SU		SU		SU		SU		SU	Blank	SU	Blank	SU	Blank	SU	Blank	SU	SU;SU;SU;SU;SU;SU;SU;SU;SU	SU		SU		SU		SU		SU
1638	0.065	0	Negative	Female	Staff	57		S	A +ve	A	Positive		SU		SU		SU		SU			SU		SU		SU		SU		SU	Blank	SU	Blank	SU	Blank	SU	Blank	SU	SU;SU;SU;SU;SU;SU;SU;SU;SU	SU		SU		SU		SU		SU
1639	0.095	0	Negative	Male	Staff	37		S	B +ve	B	Positive		SU		SU		SU		SU			SU		SU		SU		SU		SU	Blank	SU	Blank	SU	Blank	SU	Blank	SU	SU;SU;SU;SU;SU;SU;SU;SU;SU	SU		SU		SU		SU		SU
1640	0.068	0	Negative	Female	Student	36		S	A +ve	A	Positive		SU		SU		SU		SU			SU		SU		SU		SU		SU	Blank	SU	Blank	SU	Blank	SU	Blank	SU	SU;SU;SU;SU;SU;SU;SU;SU;SU	SU		SU		SU		SU		SU
1641	0.066	0	Negative	Male	Labor	31		OS	AB +ve	AB	Positive		SU		SU		SU		SU			SU		SU		SU		SU		SU	Blank	SU	Blank	SU	Blank	SU	Blank	SU	SU;SU;SU;SU;SU;SU;SU;SU;SU	SU		SU		SU		SU		SU
1642	0.065	0	Negative	Male	Labor	29		OS	B +ve	B	Positive		SU		SU		SU		SU			SU		SU		SU		SU		SU	Blank	SU	Blank	SU	Blank	SU	Blank	SU	SU;SU;SU;SU;SU;SU;SU;SU;SU	SU		SU		SU		SU		SU
1643	0.067	0	Negative	Male	Labor	31		OS	O +ve	O	Positive		SU		SU		SU		SU			SU		SU		SU		SU		SU	Blank	SU	Blank	SU	Blank	SU	Blank	SU	SU;SU;SU;SU;SU;SU;SU;SU;SU	SU		SU		SU		SU		SU
1644	0.069	0	Negative	Male	NPIC labor	31		OS	AB +ve	AB	Positive		SU		SU		SU		SU			SU		SU		SU		SU		SU	Blank	SU	Blank	SU	Blank	SU	Blank	SU	SU;SU;SU;SU;SU;SU;SU;SU;SU	SU		SU		SU		SU		SU
1645	0.066	0	Negative	Male	Labor	26		OS	O +ve	O	Positive		SU		SU		SU		SU			SU		SU		SU		SU		SU	Blank	SU	Blank	SU	Blank	SU	Blank	SU	SU;SU;SU;SU;SU;SU;SU;SU;SU	SU		SU		SU		SU		SU
1646	152.9	1	Positive	Male	NPIC staff	29		S	AB +ve	AB	Positive		SU		SU		SU		SU			SU		SU		SU		SU		SU	Blank	SU	Blank	SU	Blank	SU	Blank	SU	SU;SU;SU;SU;SU;SU;SU;SU;SU	SU		SU		SU		SU		SU
1647	0.065	0	Negative	Male	Student	24		S	O +ve	O	Positive		SU		SU		SU		SU			SU		SU		SU		SU		SU	Blank	SU	Blank	SU	Blank	SU	Blank	SU	SU;SU;SU;SU;SU;SU;SU;SU;SU	SU		SU		SU		SU		SU
1648	0.066	0	Negative	Female	NPIC staff	35		S	O -ve	O	Negative		SU		SU		SU		SU			SU		SU		SU		SU		SU	Blank	SU	Blank	SU	Blank	SU	Blank	SU	SU;SU;SU;SU;SU;SU;SU;SU;SU	SU		SU		SU		SU		SU
1649	0.062	0	Negative	Male	Student	20		S	O +ve	O	Positive		SU		SU		SU		SU			SU		SU		SU		SU		SU	Blank	SU	Blank	SU	Blank	SU	Blank	SU	SU;SU;SU;SU;SU;SU;SU;SU;SU	SU		SU		SU		SU		SU
1650	0.065	0	Negative	Female	Student	23		S	O +ve	O	Positive		SU		SU		SU		SU			SU		SU		SU		SU		SU	Blank	SU	Blank	SU	Blank	SU	Blank	SU	SU;SU;SU;SU;SU;SU;SU;SU;SU	SU		SU		SU		SU		SU
1651	0.065	0	Negative	Male	Student	25		S	O +ve	O	Positive		SU		SU		SU		SU			SU		SU		SU		SU		SU	Blank	SU	Blank	SU	Blank	SU	Blank	SU	SU;SU;SU;SU;SU;SU;SU;SU;SU	SU		SU		SU		SU		SU
1652	0.061	0	Negative	Female	Staff	54		S	O -ve	O	Negative		SU		SU		SU		SU			SU		SU		SU		SU		SU	Blank	SU	Blank	SU	Blank	SU	Blank	SU	SU;SU;SU;SU;SU;SU;SU;SU;SU	SU		SU		SU		SU		SU
1653	0.07	0	Negative	Female	Student	27		S	A +ve	A	Positive		SU		SU		SU		SU			SU		SU		SU		SU		SU	Blank	SU	Blank	SU	Blank	SU	Blank	SU	SU;SU;SU;SU;SU;SU;SU;SU;SU	SU		SU		SU		SU		SU
1654	0.061	0	Negative	Female	Student	25		S	O +ve	O	Positive		SU		SU		SU		SU			SU		SU		SU		SU		SU	Blank	SU	Blank	SU	Blank	SU	Blank	SU	SU;SU;SU;SU;SU;SU;SU;SU;SU	SU		SU		SU		SU		SU
1655	0.065	0	Negative	Male	Student	33		S	O +ve	O	Positive		SU		SU		SU		SU			SU		SU		SU		SU		SU	Blank	SU	Blank	SU	Blank	SU	Blank	SU	SU;SU;SU;SU;SU;SU;SU;SU;SU	SU		SU		SU		SU		SU
1656	0.067	0	Negative	Male	Staff	57		S	O +ve	O	Positive		SU		SU		SU		SU			SU		SU		SU		SU		SU	Blank	SU	Blank	SU	Blank	SU	Blank	SU	SU;SU;SU;SU;SU;SU;SU;SU;SU	SU		SU		SU		SU		SU
1657	0.064	0	Negative	Female	Student	26		S	AB +ve	AB	Positive		SU		SU		SU		SU			SU		SU		SU		SU		SU	Blank	SU	Blank	SU	Blank	SU	Blank	SU	SU;SU;SU;SU;SU;SU;SU;SU;SU	SU		SU		SU		SU		SU
1658	0.065	0	Negative	Female	Student	31		S	O +ve	O	Positive		SU		SU		SU		SU			SU		SU		SU		SU		SU	Blank	SU	Blank	SU	Blank	SU	Blank	SU	SU;SU;SU;SU;SU;SU;SU;SU;SU	SU		SU		SU		SU		SU
1659	0.067	0	Negative	Female	Student	27		S	B +ve	B	Positive		SU		SU		SU		SU			SU		SU		SU		SU		SU	Blank	SU	Blank	SU	Blank	SU	Blank	SU	SU;SU;SU;SU;SU;SU;SU;SU;SU	SU		SU		SU		SU		SU
1660	0.07	0	Negative	Female	Student	27		S	B +ve	B	Positive		SU		SU		SU		SU			SU		SU		SU		SU		SU	Blank	SU	Blank	SU	Blank	SU	Blank	SU	SU;SU;SU;SU;SU;SU;SU;SU;SU	SU		SU		SU		SU		SU
1661	0.066	0	Negative	Male	Student	27		S	O +ve	O	Positive		SU		SU		SU		SU			SU		SU		SU		SU		SU	Blank	SU	Blank	SU	Blank	SU	Blank	SU	SU;SU;SU;SU;SU;SU;SU;SU;SU	SU		SU		SU		SU		SU
1662	20.51	1	Positive	Female	Student	25		S	B +ve	B	Positive		SU		SU		SU		SU			SU		SU		SU		SU		SU	Blank	SU	Blank	SU	Blank	SU	Blank	SU	SU;SU;SU;SU;SU;SU;SU;SU;SU	SU		SU		SU		SU		SU
1663	0.067	0	Negative	Female	Student	29		S	B +ve	B	Positive		SU		SU		SU		SU			SU		SU		SU		SU		SU	Blank	SU	Blank	SU	Blank	SU	Blank	SU	SU;SU;SU;SU;SU;SU;SU;SU;SU	SU		SU		SU		SU		SU
1664	0.075	0	Negative	Male	Student	22		S	O +ve	O	Positive		SU		SU		SU		SU			SU		SU		SU		SU		SU	Blank	SU	Blank	SU	Blank	SU	Blank	SU	SU;SU;SU;SU;SU;SU;SU;SU;SU	SU		SU		SU		SU		SU
1665	0.065	0	Negative	Male	Student	25		S	O +ve	O	Positive		SU		SU		SU		SU			SU		SU		SU		SU		SU	Blank	SU	Blank	SU	Blank	SU	Blank	SU	SU;SU;SU;SU;SU;SU;SU;SU;SU	SU		SU		SU		SU		SU
1666	0.064	0	Negative	Male	Student	27		S	B +ve	B	Positive		SU		SU		SU		SU			SU		SU		SU		SU		SU	Blank	SU	Blank	SU	Blank	SU	Blank	SU	SU;SU;SU;SU;SU;SU;SU;SU;SU	SU		SU		SU		SU		SU
1667	0.064	0	Negative	Female	Student	27		S	A +ve	A	Positive		SU		SU		SU		SU			SU		SU		SU		SU		SU	Blank	SU	Blank	SU	Blank	SU	Blank	SU	SU;SU;SU;SU;SU;SU;SU;SU;SU	SU		SU		SU		SU		SU
1668	0.073	0	Negative	Male	Staff	46		S	O +ve	O	Positive		SU		SU		SU		SU			SU		SU		SU		SU		SU	Blank	SU	Blank	SU	Blank	SU	Blank	SU	SU;SU;SU;SU;SU;SU;SU;SU;SU	SU		SU		SU		SU		SU
1669	0.065	0	Negative	Male	Student	27		S	O +ve	O	Positive		SU		SU		SU		SU			SU		SU		SU		SU		SU	Blank	SU	Blank	SU	Blank	SU	Blank	SU	SU;SU;SU;SU;SU;SU;SU;SU;SU	SU		SU		SU		SU		SU
1670	0.061	0	Negative	Male	Student	25		S	A +ve	A	Positive		SU		SU		SU		SU			SU		SU		SU		SU		SU	Blank	SU	Blank	SU	Blank	SU	Blank	SU	SU;SU;SU;SU;SU;SU;SU;SU;SU	SU		SU		SU		SU		SU
1671	0.055	0	Negative	Male	Staff	60		S	B +ve	B	Positive		SU		SU		SU		SU			SU		SU		SU		SU		SU	Blank	SU	Blank	SU	Blank	SU	Blank	SU	SU;SU;SU;SU;SU;SU;SU;SU;SU	SU		SU		SU		SU		SU
[truncated: 7,767 more rows]
