# Supplementary material for: Insights from a Pan India Sero-Epidemiological survey (Phenome-India Cohort) for SARS-CoV2
Source: eLife. 2021 Apr 20;10:e66537. doi: 10.7554/eLife.66537 (PMC8118652; doi:10.7554/eLife.66537)
Supplement: Figure 4—source data 1. [file elife-66537-fig4-data1.xlsx]

## Sheet: Figure-4A-data
Sample IDs	Baseline	3 months followup
1	15.43	12.65
2	84.33	140.2
3	71.75	16.46
4	3.71	2.37
5	21.46	10.8
6	15.97	25.85
7	182.1	150.6
8	2.66	4.26
9	17.26	25.77
10	68.34	111.9
11	3.31	8.95
12	69.39	157.5
13	10.59	10.26
14	10.63	54.44
15	50.16	73.83
16	9.24	23.15
17	86.77	200.2
18	73.45	171.8
19	14.43	28.81
20	26.63	28.34
21	14.03	39.74
22	3.5	2.3
23	7.06	9.75
24	10.54	13.32
25	3.58	0.967
26	55.9	113.8
27	8.35	26.74
28	1.15	5.48
29	49.33	57.8
30	68.77	125.4
31	17.73	22.1
32	32.9	141.3
33	23.51	71.57
34	10.54	17.81
35	1.2	1.13
36	28.13	41.94
37	2.23	4.01
38	13.34	20.48
39	8.8	10.11
40	10.96	19.99
41	34.33	173.3
42	29.79	53.89
43	31.28	94.07
44	49.94	148.1
45	36.17	24.47
46	6.53	30.57
47	48.64	53.68
48	9.05	8.98
49	70.89	81.14
50	1.89	5.82
51	28.54	61.34
52	41.38	147.2
53	13.69	47.93
54	11.13	8.84
55	59.33	117.6
56	9.03	10.15
57	4.32	7.64
58	3.2	2.83
59	9.54	6.57
60	37.69	28.71
61	43.03	56.04
62	19.3	16.12
63	64.46	76.49
64	16.82	9.86
65	19.29	46.65
66	1.85	9.95
67	42.67	41.26
68	86.66	27.74
69	32.92	37.53
70	26.09	36.39
71	114.1	89.86
72	3.63	2.95
73	7.89	4.88
74	11.56	8.96
75	26.26	12.03
76	16.68	6.88
77	69.86	37.56
78	9.03	96.12
79	9.18	9.69
80	34.38	27.13
81	23.34	44.17
82	40.31	113.7
83	20	24.83
84	7.54	9.41
85	40.75	30.88
86	7.31	2.92
87	13.45	14.49
88	50.25	42.82
89	63.64	85.04
90	64.91	195.8
91	1.18	1.3
92	1.49	3.92
93	1.32	2.1
94	6.77	39.41
95	143.3	172.9
96	1.36	1.49
97	14.57	12.44
98	45.87	60.99
99	44.67	43.89
100	74.09	57.13
101	88.89	157.9
102	2.75	0.975
103	12.97	27.73
104	23.05	20.08
105	10.29	11.67
106	4.55	3.51
107	7.63	13.85
108	33.34	81.48
109	8.19	10.72
110	1.31	0.684
111	38.93	23.24
112	5.08	4.52
113	108.4	44.65
114	38.37	47.05
115	3.02	6.9
116	114.7	100.7
117	1.17	0.796
118	25.7	21.97
119	22.18	31.26
120	4.45	15.41
121	7.77	47.5
122	6.61	37.03
123	13.23	46.34
124	1.47	24.36
125	81.28	164.8
126	7.29	11.14
127	23.1	127
128	1.8	89.59
129	38.04	161
130	13.7	10
131	1.22	6.41
132	6.88	38.24
133	34.57	183.5
134	4.3	3.72
135	39.84	72.4
136	11.58	35.64
137	38.91	163.6
138	69.28	95.61
139	24.05	18.3
140	2.81	29.26
141	1.06	77.31
142	1.89	14.43
143	33.64	131.3
144	19.77	64.67
145	3.34	21.85
146	60.46	86.96
147	13.33	152.6
148	1.61	1.38
149	75.92	53.09
150	6.91	67.6
151	16.01	76.9
152	5.99	6.74
153	7.78	61.91
154	8.31	37
155	1.02	4.22
156	55.65	164.3
157	4.09	10.64
158	21.28	86.57
159	6.96	66.88
160	31	52.34
161	4.75	1.82
162	63.71	175.5
163	5.17	5.75
164	31.9	48.4
165	6.39	65.17
166	1.13	3.14
167	30.39	12.09
168	59.38	120.1
169	47.19	115.6
170	4.12	68.45
171	53.02	120
172	66.03	46.83
173	58.92	33.05
174	27.61	3.27
175	52.79	38.18
176	4.41	2.18
177	16.3	46.45
178	6.76	17.94
179	15.22	130.5
180	2.21	42.82
181	15.22	12.22
182	19.94	86.43
183	18.52	137.7
184	3.93	4.72
185	2.56	4.53
186	2.24	23.49
187	45.71	28.88
188	7.83	46.19
189	64.71	93.76
190	2.07	1.63
191	2.32	27.41
192	2.78	23.88
193	3.12	12.49
194	1.52	24.78
195	21.15	23.64
196	8.99	19.05
197	2.64	10.17
198	7.32	16.68
199	15.23	128.7
200	54.53	53.16
201	3.67	4.26
202	28.57	118.3
203	24.51	10.66
204	76.83	131.9
205	66.02	97.47
206	2.12	49.22
207	1.8	23.85
208	1.51	7.13
209	2.76	9.32
210	1.13	77.44
211	7.68	16.37
212	1.52	50.55
213	5.15	131.6
214	15.37	11.09
215	12.91	62.75
216	3.27	22.55
217	8.51	115.5
218	20.1	91.77
219	5.22	8.81
220	47.81	130.6
221	36.42	50.66
222	17.01	54.18
223	27.44	59.2
224	76.59	133.9
225	1.55	2.07
226	23.21	54.98
227	40.97	125
228	62.14	125.8
229	13.45	142.7
230	1.5	12.72
231	55.07	97.07
232	106.7	119.4
233	13.94	86.53
234	43.88	30.26
235	9.25	53.48
236	8.67	42.02
237	41.38	89.51
238	54.16	94.38
239	55.97	45.93
240	7.23	135.1
241	9.87	9.5
242	15.19	76.85
243	24.82	35.85
244	3.41	15.82
245	16.38	31.1
246	15.21	47.38
247	30.39	83.45
248	4.18	10.16
249	57.69	84.8
250	4.21	9.76
251	1.27	1.35
252	1.19	7.42
253	2.63	3.56
254	34.1	139.7
255	38.96	54.2
256	22.73	139.4
257	1.73	109.7
258	20.39	21.14
259	2.92	42.8
260	75.48	150.5
261	1.27	9.95
262	48.71	130
263	13.18	13.54
264	1.41	46.68
265	38.88	29.67
266	24.61	112.8
267	4.74	16.24
268	70.87	84.31
269	10.1	19.7
270	1.19	10.39
271	1.19	6.36
272	1.88	11.24
273	12.06	93.82
274	18.35	113
275	5.93	29.58
276	66.18	53.69
277	17.75	108.5
278	50.44	106.2
279	25.35	95.73
280	16.05	14.88
281	88.41	71.87
282	12.95	24.18
283	80.49	201.5
284	65.96	70.43
285	9.81	6.84
286	118.2	147.1
287	40.81	32.99
288	3.17	150.5
289	8.72	19.16
290	69.77	65.18
291	68.75	65.96
292	14.44	62.3
293	2.29	5.89
294	9.91	9.87
295	3.41	14.01
296	32.32	28.69
297	5.58	34.55
298	44.31	21.37
299	51.36	30.22
300	40.36	50.21
301	5.89	3.35
302	80.8	69.68
303	1.48	4.15
304	56.32	21.17
305	3.5	1.68
306	43.62	15.3
307	74.44	14.53
308	5.6	2.39
309	4.83	18.2
310	12.89	19.92
311	6.38	46.42
312	44.09	27.36
313	5.67	19.34
314	33.93	77.34
315	57.06	87.97
316	18.97	45.84
317	15.04	115.3
318	3.52	55.25
319	20.74	92.9
320	2.81	58.59
321	45.65	51.97
322	30.6	12.95
323	6.19	54.15
324	33.93	205.1
325	16.06	78.57
326	117	134.3
327	16.41	46.82
328	25.6	0.104
329	20.74	2.56
330	4.1	13.02
331	3.27	69.05
332	28.02	25.99
333	6.25	20.83
334	56.92	164.6
335	20.54	72.9
336	11.08	22.33
337	46.58	55.88
338	64.22	60.69
339	4.72	62.41
340	144	92.78
341	5.58	48.31
342	5.38	4.2
343	2.58	7.39
344	14.11	30.67
345	22.64	6.94
346	12.19	4.33
347	85.09	105.5
348	5.09	11.91
349	11.22	52.77
350	3.61	11.44
351	20.1	23.45
352	4.44	71.81
353	6.69	18.2
354	1.07	7.95
355	59.08	95.94
356	10.97	21.71
357	63.68	119.4
358	31.04	77.81
359	20.23	0.079
360	4.15	3.48
361	1.39	26.59
362	1.44	14.98
363	10.14	20.29
364	31.87	28.19
365	28.81	13.9
366	12.49	32.46
367	58.02	85.08
368	82.17	86.01
369	11.34	22.06
370	23.1	17.01
371	35.67	53.89
372	4.72	115.5
373	1.66	4.2
374	8.52	12.2
375	38.83	29.35
376	23.37	126.8
377	1.69	0.848
378	3.78	48.67
379	4.84	13.35
380	1.28	0.242
381	50.09	122.6
382	1.91	80.61
383	49.96	33.35
384	13.25	11.77
385	4.81	23.64
386	33.68	141.6
387	4.55	19.33
388	55.72	132.6
389	13.96	10.31
390	27.86	22.85
391	152.9	208.9
392	20.51	22.47
393	3.46	1.42
394	45.99	61.31
395	4.94	29.94
396	1.82	7.26
397	6.03	20.7
398	43.11	54.62
399	6.61	18.86
400	25.46	38.7
401	21.55	0.078
402	106.5	0.084
403	15.57	97.59
404	49.79	169.9
405	11.29	8.52
406	68.01	139.6
407	69.29	71.89
408	70.12	182.6
409	34.35	136.5
410	118.5	64.55
411	151.6	185.9
412	1.6	1.07
413	125	163.1
414	76.04	147
415	83.74	106.5
416	2.11	207.5
417	49.95	109.7
418	21.22	20.41
419	163.6	209.7
420	15.24	13.62
421	59.52	99.76
422	4.28	5.02
423	70.96	75.91
424	13.74	10.97
425	5.27	30.5
426	95.14	147.5
427	3.91	29.78
428	4.01	139
429	2.36	4.33
430	74.1	164.3
431	18.53	53.44
432	43.89	42.78
433	109.9	0.076
434	75.21	77.14
435	39.2	17.38
436	3.74	6.67
437	1.06	137.3
438	238.6	149.2
439	102	185.8
440	150.6	188
441	172.7	216.9
442	47.58	66.32
443	9.79	184
444	12.11	195.6
445	43.76	152.3
446	6.11	83.57
447	74.81	145.1
448	1.98	27.2
449	99.43	142.8
450	42.03	101.4
451	26.67	19.01
452	108.5	91.38
453	82.58	135
454	4.95	0.081
455	1.81	95.37
456	22.55	7.91
457	1.03	0.305
458	69.53	25.74
459	64.46	19
460	60.13	20.69
461	63.51	89.74
462	63.59	17.8
463	35.34	51.12
464	122.4	193.8
465	24.5	18.2
466	3.53	9.02
467	162.1	198.1
468	41.06	22.02
469	5.99	22.65
470	4.59	2.02
471	65.85	12.2
472	10.91	164.5
473	106.9	79.94
474	27.9	12.53
475	40.19	26.89
476	89.33	39.09
477	5.46	5.98
478	14.62	16.84
479	9.03	5.24
480	108.3	99.85
481	17.17	11.95
482	3.43	1.49
483	10.83	56.81
484	94.7	133.4
485	12.17	6.74
486	1.19	88.18
487	59.23	91.46
488	35.55	7.56
489	11.85	23.95
490	16.66	29.57
491	42.68	98.44
492	30.37	205.2
493	8.99	6.99
494	1.4	0.358
495	3.81	2.57
496	50.8	20.58
497	26.26	28.66
498	9.49	2.51
499	101	96.95
500	2.13	0.574
501	3.37	6.3
502	8.14	3.97
503	64.12	67.72
504	4.24	3.83
505	1.58	0.98
506	41.81	78.54
507	26.67	20.06
508	118.5	178.1
509	1.94	1.39
510	41.46	170.5
511	10.94	3.74
512	31.38	32.85
513	42.06	40.48
514	1.49	56
515	27.34	15.99
516	95.62	153.9
517	92.08	83.79
518	54.75	48.16
519	2.61	5.65
520	4.4	5.33
521	26.59	44.23
522	10.72	3.35
523	73.26	19.89
524	5.06	1.23
525	8.43	3.72
526	149.3	130.7
527	22.65	5.44
528	31.9	10.53
529	4.01	1.31
530	61.22	182.5
531	15.04	12.47
532	24.13	12.9
533	13.93	2.54
534	40.67	36.14
535	41.33	127.3
536	30.47	78.26
537	102.3	150.9
538	10.11	25.37
539	34.33	5.48
540	9.08	86.65
541	126.9	207.6
542	8.69	3.04
543	24.71	6.77
544	26.65	12.41
545	2.35	3.39
546	128.1	41.89
547	176	182.6
548	101.8	130.7
549	19.56	36.76
550	8.52	3.11
551	7.6	14.46
552	6.31	2.3
553	114.8	42.49
554	1.77	0.477
555	92.73	12.88
556	114.4	274.7
557	22.85	21.95
558	12.25	8.66
559	40	38.49
560	14.15	9.84
561	169.8	186.9
562	8.19	9.25
563	28.57	39.64
564	82.22	86.98
565	132.8	207
566	44.49	24.63
567	2.26	53.4
568	56.33	20.04
569	13.98	7.51
570	44.96	126.4
571	1.06	41.88
572	79.81	83.65
573	58.59	58.68
574	2.25	3.44
575	22.26	25.12
576	57.74	51.14
577	113.4	208.9
578	12.52	5.14
579	140.6	330.6
580	143.4	305.3
581	10.9	23.63
582	19.81	156.6
583	39.72	20.06
584	28.01	33.07
585	82.3	112
586	139.1	116
587	163.6	110.4
588	35.75	58.68
589	34.77	25.64
590	24.19	66.61
591	1.6	1.11
592	15.84	29.39
593	31.5	13.44
594	12.52	17.38
595	76.24	108.4
596	1.26	1.9
597	28.59	20.41
598	5.39	31.82
599	6.6	78.07
600	33.04	37.16
601	65.36	70.64
602	9.6	204.7
603	117	282.2
604	116	84.92
605	105.4	51.84
606	11.76	8.46
607	46.98	266.2

## Sheet: Figure 4B Data
Sample IDs	Baseline	3 months followup
1	55.686	32.0182
2	92.0389	89.1611
3	82.156	47.4149
4	64.5077	55.9749
5	33.9642	80.8574
6	58.8987	26.8908
7	94.2444	48.4333
8	30.6193	80.3589
9	61.6568	40.3148
10	93.0316	95.6986
11	71.2902	95.7698
12	95.6331	95.9051
13	45.0911	61.1665
14	90.8164	95.663
15	73.1729	84.4253
16	80.5619	61.5582
17	95.7505	94.1532
18	96.7236	95.3497
19	42.1551	16.9135
20	73.9065	36.5902
21	78.0924	69.9117
22	45.3238	37.3237
23	47.3777	46.2114
24	90.1024	77.8664
25	45.1087	28.3578
26	70.6888	28.9204
27	61.8426	94.2743
28	48.2335	20.3959
29	92.303	85.1374
30	92.8458	86.9178
31	80.9531	83.4354
32	83.9263	77.2611
33	82.1414	75.8581
34	22.36	17.2483
35	53.0453	30.302
36	74.4004	41.3545
37	44.8593	31.477
38	78.0092	60.7321
39	52.9622	35.9493
40	39.5095	51.937
41	96.5134	94.1461
42	62.9575	46.2968
43	87.7845	66.6073
44	92.4008	82.0254
45	54.6395	16.6429
46	90.1856	57.7838
47	75.7549	76.7483
48	51.1382	57.7767
49	6.82412	46.4108
50	33.7141	73.7003
51	71.9573	54.0949
52	91.7364	86.0134
53	92.7295	93.9183
54	20.2867	32.8586
55	94.4086	96.1259
56	61.5112	49.9573
57	29.916	36.811
58	20.6065	17.7895
59	47.8268	40.7705
60	53.7781	71.9769
61	78.9023	73.3656
62	85.2247	88.8264
63	93.4491	78.1014
64	77.8837	66.5005
65	61.5839	91.0412
66	59.5413	77.7881
67	95.1968	83.6633
68	76.7891	71.9698
69	68.5714	56.9648
70	39.221	9.98433
71	74.421	67.4334
72	48.0828	43.2559
73	21.3317	30.1026
74	63.0579	54.28
75	97.6746	96.0048
76	40.1061	39.9801
77	96.9789	95.4707
78	66.7425	76.8053
79	70.6312	52.9483
80	62.1653	46.2897
81	72.3816	66.2726
82	97.8112	94.8084
83	37.7776	33.0936
84	80.3663	71.6209
85	74.7958	89.2893
86	30.5786	27.4462
87	68.3249	67.177
88	88.2895	81.655
89	94.934	95.7698
90	91.4501	94.9936
91	64.5691	40.3916
92	9.4928	16.5404
93	1.71656	15.7242
94	77.6934	53.6475
95	93.013	78.1658
96	9.94566	12.3573
97	91.6351	78.9716
98	84.1958	58.771
99	66.0578	55.9002
100	86.3079	95.8666
101	90.4485	92.2519
102	36.0199	34.1279
103	79.9911	67.3102
104	81.931	74.1153
105	0.986379	24.8134
106	69.3023	49.4774
107	40.6775	40.4301
108	71.7543	89.938
109	36.7133	37.9006
110	11.9296	27.5251
111	85.2444	63.1229
112	2.84655	16.4268
113	64.9813	62.5728
114	13.7971	22.8107
115	28.9593	30.8322
116	95.6742	93.9359
117	33.9986	39.5382
118	36.7894	33.1158
119	74.1123	82.7173
120	72.4734	88.7733
121	38.3299	75.3883
122	68.4988	78.6835
123	62.4895	62.1762
124	32.9673	79.7889
125	64.4852	57.2465
126	52.9182	55.0253
127	92.8257	96.8044
128	40.9687	65.8283
129	73.1367	52.5908
130	50.6996	37.0572
131	36.9474	34.7443
132	42.2432	31.6005
133	89.1187	95.4078
134	39.7347	21.299
135	93.8904	87.0769
136	88.1432	93.69
137	77.089	81.1261
138	92.9316	56.5317
139	90.1388	69.0675
140	65.6503	52.3126
141	42.4829	9.48184
142	53.9941	35.5437
143	87.7139	58.4057
144	77.652	72.2225
145	71.7821	50.2386
146	74.1569	40.4592
147	94.3141	95.8457
148	20.8229	-4.9346
149	33.4578	36.2263
150	78.3321	64.8347
151	80.5452	47.9537
152	25.6536	0.808402
153	72.7688	64.9357
154	54.3955	50.3634
155	20.4779	7.2419
156	46.4463	83.3605
157	66.9603	29.3213
158	88.1654	68.9609
159	54.8934	37.293
160	83.0091	80.1208
161	60.1148	73.8031
162	90.0942	97.1145
163	62.7906	44.5492
164	74.513	81.5715
165	62.8168	47.1678
166	24.945	37.8991
167	60.8873	75.0868
168	50.6439	94.0638
169	73.4727	77.0486
170	76.2255	81.4495
171	71.1261	85.2492
172	71.1527	62.0866
173	71.421	46.7217
174	34.1675	22.4909
175	45.9049	61.4278
176	36.9357	31.9452
177	83.1386	85.4505
178	55.0632	81.8687
179	81.9379	79.155
180	78.0893	93.2069
181	54.5012	46.4769
182	89.6501	93.7133
183	83.1332	91.9163
184	10.4592	35.1756
185	54.9325	86.1792
186	57.4999	64.5711
187	66.8619	72.5066
188	67.0538	92.9908
189	85.7138	76.9654
190	37.7138	49.6326
191	0.6386	54.8447
192	27.5585	78.7254
193	72.5356	66.8746
194	64.5791	62.3788
195	71.186	71.6729
196	69.09	57.0055
197	63.8707	69.9191
198	75.2858	74.174
199	52.9229	59.0811
200	93.0565	77.1444
201	44.4218	36.3182
202	82.6567	82.0787
203	94.1669	90.0306
204	88.9734	85.0429
205	84.0179	78.4104
206	69.9802	94.5347
207	80.9631	92.8673
208	63.1497	56.0983
209	65.77	81.1771
210	63.072	87.2279
211	55.0883	91.0579
212	32.8238	62.6505
213	61.8985	80.779
214	48.9185	42.611
215	86.9396	80.5286
216	62.2077	67.1339
217	95.1014	91.5766
218	92.0115	89.5819
219	62.9211	78.2128
220	94.4027	92.6264
221	75.1413	86.031
222	62.8909	68.6716
223	90.9111	91.3481
224	96.6589	96.7764
225	41.5517	93.2193
226	94.7141	92.9853
227	84.0993	87.2384
228	96.139	95.0389
229	52.5426	95.9489
230	70.4429	71.6174
231	89.9585	90.8294
232	80.3936	83.0915
233	67.9801	92.4597
234	95.2093	96.5541
235	76.0851	63.8177
236	67.0535	87.686
237	95.0389	89.2237
238	84.4776	91.3049
239	84.3521	93.4972
240	77.9396	93.5713
241	73.1484	73.4268
242	36.6634	53.7084
243	92.5505	72.7351
244	45.28	50.981
245	94.5779	88.2442
246	74.2652	69.6728
247	82.6543	71.5274
248	90.6939	86.4945
249	94.144	97.0611
250	85.714	71.5797
251	33.1956	31.2989
252	83.6031	62.0033
253	8.56844	33.4521
254	80.1802	88.8467
255	71.1056	95.3637
256	93.866	93.4568
257	52.2119	93.4568
258	64.1828	71.0716
259	30.481	45.6165
260	91.8923	97.0349
261	67.8417	39.5762
262	70.7198	85.1272
263	46.9524	41.8603
264	86.236	82.5604
265	76.9253	49.7437
266	96.0642	93.9789
267	75.0233	59.4825
268	94.8657	91.1814
269	32.206	38.0967
270	45.7476	93.1822
271	75.3547	73.7047
272	67.1199	84.6724
273	74.6465	89.1249
274	89.8722	93.8801
275	90.3806	90.1748
276	64.9772	52.2077
277	72.7535	93.6763
278	96.6407	95.8995
279	82.6452	59.2293
280	71.7788	81.2882
281	90.8963	90.1538
282	41.8069	78.1898
283	92.5013	93.2787
284	87.1531	73.0989
285	42.1636	50.3616
286	41.3834	51.4645
287	91.73	82.993
288	25.1599	57.8182
289	58.9265	19.2088
290	96.6073	91.3686
291	74.0666	68.5195
292	76.6612	73.4506
293	44.4506	43.7522
294	54.6243	48.6194
295	34.9145	77.7343
296	31.8339	28.8392
297	33.7197	74.8651
298	20.3986	24.1079
299	72.3591	59.7283
300	92.458	89.7063
301	26.2111	34.1836
302	85.5064	88.408
303	62.0101	59.2042
304	62.038	70.4116
305	17.558	38.1078
306	60.0312	62.6339
307	39.1382	46.6546
308	11.6838	24.2789
309	67.9479	43.595
310	86.0814	73.7622
311	69.073	73.1309
312	93.2206	52.6793
313	88.3317	63.9481
314	84.5108	73.8981
315	92.1241	93.1189
316	70.8242	56.1159
317	93.0314	92.024
318	72.3717	79.7083
319	94.3578	92.3037
320	76.999	37.4785
321	86.0276	58.1299
322	52.33	45.047
323	74.1955	40.7153
324	70.2341	93.3347
325	92.522	93.3347
326	86.715	69.7982
327	52.6256	50.4895
328	75.9439	93.7343
329	43.6531	36.7353
330	82.591	75.6324
331	86.4295	93.966
332	82.9025	74.2418
333	55.5907	48.8352
334	95.9756	93.5105
335	93.8051	69.4625
336	66.7144	13.031
337	84.8117	81.8981
338	87.1178	77.6863
339	57.309	77.7582
340	90.0821	91.041
341	55.5606	44.7433
342	80.7119	71.8122
343	64.142	38.7493
344	76.7528	38.5574
345	64.976	49.962
346	51.1744	48.0599
347	93.8693	83.4884
348	66.6581	45.8702
349	64.0688	27.3965
350	83.6194	54.2656
351	43.6557	11.3619
352	85.2358	92.6439
353	69.6408	25.8919
354	52.4048	29.6843
355	90.8866	86.7923
356	63.2521	55.8089
357	94.5815	63.8398
358	86.7117	81.2161
359	80.9836	7.63146
360	36.8717	40.6003
361	64.0727	40.0458
362	76.7623	85.4157
363	77.2113	78.1643
364	46.4186	21.2579
365	90.3078	69.8309
366	77.0358	37.3817
367	86.7788	92.8494
368	85.5506	80.9601
369	77.7634	51.0354
370	93.8951	94.3113
371	88.2134	88.0526
372	87.6716	81.1618
373	55.3101	41.496
374	90.964	79.1492
375	88.6108	93.7103
376	76.5559	92.9812
377	13.1283	6.50303
378	67.0399	58.2403
379	90.7834	96.9443
380	43.1881	0.255929
381	43.5442	62.8781
382	22.6804	75.9229
383	76.7432	54.3702
384	36.005	27.443
385	28.959	22.1653
386	94.4984	89.7627
387	47.2367	83.027
388	88.2859	91.1587
389	67.1806	40.9881
390	57.7243	37.7036
391	67.0905	40.6546
392	37.2147	42.1902
393	55.9922	77.0591
394	61.0232	47.7742
395	53.8446	33.1278
396	33.0697	29.789
397	61.8742	80.0644
398	75.2853	77.1095
399	83.2799	50.4498
400	37.5651	44.986
401	15.7353	19.3927
402	10.2606	20.684
403	93.619	62.0261
404	44.7762	46.9855
405	43.847	33.2723
406	96.4508	96.8387
407	59.7225	17.134
408	90.0242	88.6057
409	96.8263	97.579
410	87.0364	71.1228
411	93.6604	97.5748
412	35.5877	18.019
413	86.7101	80.662
414	91.2753	58.9584
415	83.4293	72.1525
416	33.6153	82.0831
417	92.1843	88.2398
418	36.2635	56.3247
419	63.7146	41.3479
420	63.9768	81.8576
421	93.919	78.424
422	75.3327	93.771
423	66.6544	56.4524
424	24.2059	31.2939
425	25.5807	47.0791
426	94.4827	89.4864
427	65.5737	46.6323
428	37.1971	74.199
429	44.5309	24.3331
430	96.2591	97.5875
431	71.2655	57.7799
432	29.7697	40.9309
433	92.0615	12.9175
434	96.5546	96.46
435	90.2822	58.0692
436	55.9722	35.6337
437	66.7229	69.706
438	94.0732	89.6481
439	97.3474	93.3583
440	85.4324	58.0394
441	91.9719	96.4983
442	85.8174	75.8286
443	8.73548	92.8052
444	69.4119	92.0265
445	70.9902	75.1479
446	20.1132	42.5095
447	76.5218	74.8841
448	27.7537	38.6419
449	96.7511	97.6301
450	94.6769	97.0174
451	75.8401	42.3095
452	89.3894	95.0517
453	94.4308	94.6517
454	90.1123	16.0022
455	23.4747	64.362
456	69.9388	48.5071
457	29.6146	9.79875
458	69.1135	45.7516
459	86.126	65.4172
460	69.0256	42.7052
461	56.8222	50.6106
462	81.0644	59.5796
463	63.0904	52.0955
464	91.8994	83.2192
465	67.3168	73.8757
466	49.7648	29.6941
467	75.8379	92.0436
468	22.4499	31.813
469	52.3045	62.7494
470	26.4245	13.1175
471	81.5696	75.5946
472	26.2168	34.5062
473	85.9035	94.5284
474	65.8732	73.697
475	94.6278	81.9215
476	81.0749	74.0799
477	28.1469	50.3978
478	66.0641	24.1586
479	62.885	36.0209
480	92.5624	97.3791
481	53.0786	21.0356
482	49.909	28.7495
483	82.0215	30.0472
484	94.5873	87.6952
485	61.952	36.8761
486	65.7899	30.2302
487	66.1936	51.0573
488	49.2142	16.7298
489	94.9313	96.7876
490	92.9198	93.4519
491	88.5327	58.116
492	79.7188	57.0565
493	49.1318	22.7503
494	33.34	46.6323
495	59.0914	74.199
496	57.8699	24.3331
497	85.9433	97.5875
498	24.246	57.7799
499	95.1232	40.9309
500	33.2115	12.9175
501	55.8974	96.46
502	90.134	58.0692
503	85.7605	35.6337
504	43.5188	69.706
505	58.3736	89.6481
506	84.5294	93.3583
507	67.3581	58.0394
508	73.6316	96.4983
509	75.4129	75.8286
510	77.2582	92.8052
511	31.1299	92.0265
512	48.0618	75.1479
513	78.1102	42.5095
514	87.1894	74.8841
515	55.9768	38.6419
516	77.9541	97.6301
517	78.2696	97.0174
518	77.1291	42.3095
519	5.26582	95.0517
520	55.2796	94.6517
521	92.1937	16.0022
522	54.8586	64.362
523	97.878	97.6617
524	54.2396	46.5914
525	37.4062	34.7216
526	96.5453	87.3236
527	24.4199	16.5969
528	34.7235	31.7551
529	23.2684	18.4698
530	55.5076	97.875
531	44.4277	50.3335
532	61.6061	65.7825
533	50.6901	37.0133
534	51.3456	97.8129
535	90.7401	97.7742
536	89.5239	46.541
537	95.8553	85.373
538	45.3161	48.1736
539	86.7032	39.4718
540	52.0271	66.911
541	71.9702	64.3749
542	31.3249	37.2654
543	56.1805	29.2384
544	13.5427	13.6071
545	6.56431	18.6754
546	50.7936	47.8478
547	86.9231	89.1888
548	7.99621	92.8998
549	56.5039	42.9153
550	34.7494	31.8249
551	62.0633	44.7689
552	30.7039	31.6581
553	53.4892	50.4925
554	20.4477	19.1446
555	68.2136	71.1726
556	94.6142	52.0955
557	47.8268	92.0436
558	30.9726	50.6106
559	91.6744	51.0573
560	59.1182	73.8757
561	73.3223	62.7494
562	56.154	34.5062
563	53.6691	13.1175
564	94.2544	42.7052
565	86.9896	75.5946
566	73.3623	9.79875
567	69.6499	45.7516
568	51.7105	29.6941
569	68.7904	24.1586
570	72.7854	30.2302
571	56.2975	28.7495
572	59.5206	50.3978
573	81.651	21.0356
574	36.3176	74.0799
575	68.3637	87.6952
576	52.0361	97.3791
577	87.3208	81.9215
578	53.3383	30.0472
579	84.7507	36.0209
580	95.356	73.697
581	17.1891	94.5284
582	76.9604	97.5748
583	78.7094	57.0565
584	32.3649	71.1228
585	65.1452	33.2723
586	92.3982	97.579
587	91.2749	46.9855
588	62.8648	93.4519
589	42.0977	88.6057
590	81.2211	62.0261
591	39.3695	96.7876
592	82.3805	18.019
593	79.8389	17.134
594	40.8076	22.7503
595	67.5995	16.7298
596	5.66566	82.0831
597	60.329	72.1525
598	68.4905	58.9584
599	49.2604	80.662
600	78.5539	89.4864
601	74.8072	47.0791
602	72.1815	31.2939
603	84.488	78.424
604	81.678	81.8576
605	93.272	41.3479
606	80.5871	56.3247
607	33.2115	88.2398

## Sheet: Figure 4C Data
Sample IDs	Baseline	5,6 months followup
1	41.49	288.6
2	74.38	318.6
3	32.15	94.18
4	6.77	32.47
5	143.3	144.7
6	4.19	4.42
7	46.85	126.4
8	9.27	43.33
9	3.12	147.9
10	23.45	10.97
11	28.19	120.4
12	90.56	129.8
13	1.61	1.64
14	76.15	72.73
15	35.03	41.88
16	9.81	7.6
17	12.95	15.35
18	1.57	1.6
19	80.49	192.8
20	88.41	35.32
21	3.41	14.95
22	68.75	37.47
23	51.36	17.64
24	44.31	21.11
25	2.29	6.41
26	32.32	24.37
27	40.36	48.19
28	43.76	38
29	1.03	37.75
30	29.77	17.43
31	50.55	356.4
32	10.83	38.37
33	26.65	13.65
34	26.67	15.82
35	5.46	10.15
36	12.17	9.44
37	50.8	26.21
38	16.66	28.83
39	59.23	106.1
40	8.14	5.69
41	11.85	22.11
42	108.6	38.82
43	40.19	20.96
44	63.51	83.18
45	14.89	5.21
46	31.83	8.12
47	13.68	4.19
48	120.1	54.04
49	2.26	0.697
50	1.15	0.377
51	70.34	70.19
52	6.38	24.65
53	39.36	27.07
54	1.15	1.92
55	13.27	7.36
56	17.63	4.71
57	8.46	5.58
58	120.5	63.78
59	28.25	9.7
60	1.26	0.846
61	56.33	0.082
62	24.19	41.43
63	14.52	5.86
64	126.4	98.09
65	1.14	3.05
66	37.45	9.42
67	123.5	162.9
68	69.57	16.99
69	1.81	2.62
70	51.71	153.3
71	19.7	23.33
72	137.1	380.4
73	25.6	69.72
74	20.74	49.24
75	4.1	5.07
76	3.27	51.04
77	2.26	30
78	1.07	21.34
79	6.25	93.67
80	56.92	28.52
81	20.54	136.4
82	11.08	3.14
83	7.75	18.4
84	17.4	77.36
85	144	5.74
86	1.24	396
87	5.38	109.8
88	2.58	39.71
89	22.64	29.57
90	15.04	8.29
91	3.52	144.4
92	11.82	40.8
93	45.65	72.75
94	7.19	149
95	80.8	46.67
96	3.5	1.31
97	9.15	25.19
98	3.89	40.82
99	6.11	6.93
100	5.21	13.41
101	131.4	25.08
102	9.18	0.063
103	1.8	47.15
104	38.04	73.88
105	13.7	2.11
106	1.22	1.88
107	6.88	21.92
108	39.84	25.46
109	38.91	116.5
110	69.28	45.27
111	24.05	17.42
112	1.06	38.69
113	1.89	5.21
114	33.64	136.3
115	19.77	15.49
116	3.34	7.72
117	60.46	28.25
118	13.33	137.6
119	1.61	0.768
120	75.92	22.16
121	16.01	32.59
122	5.99	3.26
123	7.78	38.51
124	8.31	24.27
125	55.65	178.9
126	21.28	86.7
127	6.96	22.93
128	63.71	145.3
129	6.39	34.55
130	31.9	31.93
131	4.75	1.33
132	5.17	3.2
133	4.09	3.7
134	33.34	43.68
135	5.08	2.93
136	108.4	27.11
137	1.17	0.429
138	88.89	150.8
139	10.29	27.3
140	6.61	22.71
141	7.29	12.47
142	152.9	409.1
143	45.99	69.12
144	28.91	203
145	32.21	80.43
146	6.03	31.03
147	43.11	42.56
148	6.61	22.96
149	21.55	0.133
150	4.55	31.1
151	55.72	228.9
152	11.56	17.76
153	74.81	193.4
154	21.22	13.98
155	43.89	28.42
156	39.2	11.9
157	83.74	119.6
158	1.98	31.56
159	46.7	13.36
160	4.37	41.9
161	12.58	1.28
162	1.2	14.23
163	6.98	40.41
164	1.57	3.02
165	19.56	21.23
166	79.62	39.94
167	7.6	15.17
168	34.33	5.24
169	24.13	14.09
170	13.93	2.58
171	15.04	16.57
172	8.69	3.4
173	126.9	299.2
174	12.18	6.54
175	8.52	3.28

## Sheet: Figure 4D Data
Sample IDs	Baseline	5,6 months followup
1	95.8576	83.3119
2	91.4165	55.2052
3	80.514	87.4709
4	77.6934	32.1688
5	93.013	65.6077
6	38.2559	58.4841
7	39.0389	70.5838
8	38.361	92.8502
9	62.6101	76.9793
10	76.7417	53.8486
11	15.5236	11.8403
12	52.8334	33.8292
13	25.3404	13.2179
14	62.6602	41.9742
15	93.9828	75.5389
16	42.1636	31.0269
17	41.8069	77.9954
18	34.7763	12.3694
19	92.5013	80.8449
20	90.8963	72.2337
21	34.9145	50.9677
22	74.0666	19.1577
23	72.3591	24.38
24	20.3986	14.8993
25	44.4506	19.4039
26	31.8339	19.8387
27	92.458	78.9959
28	72.9609	16.7902
29	77.6108	62.1978
30	85.1249	52.9319
31	83.1663	84.1186
32	82.0215	22.2795
33	46.9909	0.447846
34	67.3581	25.129
35	28.1469	60.7155
36	61.952	78.6921
37	57.8699	47.6835
38	92.9198	91.4936
39	66.1935	55.7395
40	90.134	36.2753
41	94.9313	95.752
42	51.9669	16.1826
43	94.6279	73.2342
44	56.8222	92.8136
45	32.751	6.57623
46	28.3119	17.1307
47	62.9197	2.86777
48	61.927	14.5012
49	26.2048	17.3716
50	29.8739	4.722
51	90.7647	5.54435
52	69.073	3.25538
53	27.4256	30.186
54	13.3529	23.2396
55	27.1802	23.0009
56	31.9416	27.7313
57	28.961	26.2166
58	31.995	32.8011
59	77.5796	29.6413
60	5.66565	4.65016
61	51.7105	7.50032
62	81.2211	51.9837
63	58.6555	33.7449
64	82.2606	61.5154
65	14.5139	25.878
66	57.7717	30.1784
67	88.2615	83.3015
68	78.5025	31.9278
69	13.9431	-4.87914
70	80.2853	68.6038
71	85.457	74.8317
72	95.1174	76.775
73	75.9439	85.4071
74	43.6531	53.6495
75	82.591	31.8178
76	86.4295	52.6334
77	35.6596	24.7414
78	21.9735	78.4721
79	55.5907	87.717
80	95.9756	25.2966
81	93.8051	76.445
82	66.7144	24.71
83	57.4497	41.838
84	92.3481	31.0898
85	90.0821	8.81806
86	57.2638	96.6215
87	80.7119	44.2003
88	64.142	7.42477
89	64.976	34.7615
90	93.0314	24.5738
91	72.3717	83.9981
92	54.822	57.7194
93	86.0276	48.223
94	83.8018	55.6504
95	85.5064	83.9824
96	17.558	15.3026
97	83.76	58.14
98	66.98	31.66
99	22.72	25.53
100	34.49	25.6
101	92.1225	85.9885
102	37.748	3.71632
103	40.97	60.89
104	73.14	51.88
105	50.7	35.46
106	36.95	36.89
107	42.24	38.32
108	93.89	77.07
109	77.09	90.65
110	92.93	36.26
111	90.14	62.99
112	42.48	18.28
113	53.99	32.35
114	87.71	67.23
115	77.65	37.82
116	71.78	50.4
117	74.16	38.76
118	94.31	90.95
119	20.82	18.64
120	33.46	45.02
121	80.55	48.33
122	25.65	24.54
123	72.77	65.93
124	54.4	48.33
125	46.45	84.13
126	88.17	64.75
127	54.89	55.47
128	90.09	95.64
129	62.82	45.39
130	74.51	73.72
131	60.11	61.94
132	62.79	43.06
133	66.96	40.63
134	71.75	76.18
135	2.85	13.33
136	64.98	49.73
137	34	23.4
138	90.45	20.35
139	0.99	59.07
140	68.5	51.5
141	52.92	37.9
142	67.0905	46.8225
143	61.0232	56.5562
144	90.6738	96.1537
145	62.467	75.4869
146	61.8742	82.2118
147	75.2853	80.3903
148	83.2799	61.9394
149	15.7353	18.6949
150	47.2367	89.6564
151	88.2859	94.8851
152	42.1606	80.8416
153	76.5218	70.8762
154	36.2635	69.323
155	29.7697	34.0394
156	90.2822	48.9408
157	83.4293	74.6412
158	27.7537	23.517
159	33.5425	7.63976
160	61.2297	35.495
161	87.0918	20.3944
162	60.841	42.0126
163	87.021	34.6574
164	-4.29869	18.455
165	42.0425	27.5219
166	82.4636	73.706
167	62.0633	38.6745
168	86.7032	26.3753
169	61.6061	67.8715
170	50.6901	37.3165
171	44.4277	39.1218
172	31.3249	30.0102
173	71.9702	58.7477
174	52.7775	54.9624
175	34.7494	25.7979
